# Supplementary material for: Mass spectrometry-based absolute quantification of amyloid proteins in pathology tissue specimens: Merits and limitations
Source: PubMed Central journal article supplement (PMC7329117; doi:10.1371/journal.pone.0235143), 2020-07-01

# S2 Appendix Signal linearity of each MS-QBIC peptide measured by the mass spectrometry

SAA (EANYIGSDK)

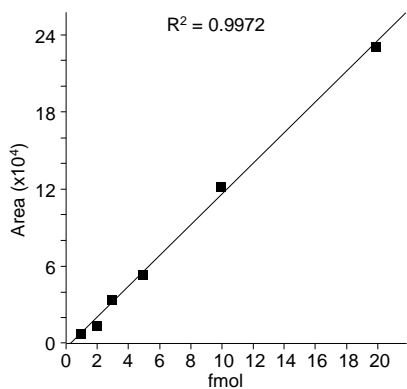

SAA (DPNHFRPAGLPEK)

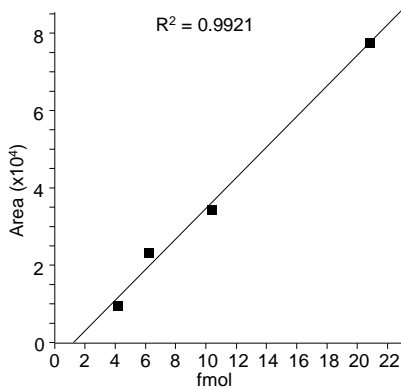

TTR (GSPAINVAVHVFR)

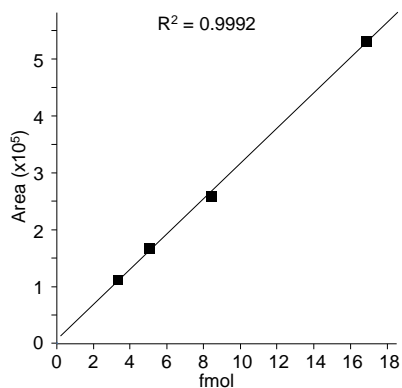

TTR (AADDTWEPFASGK)

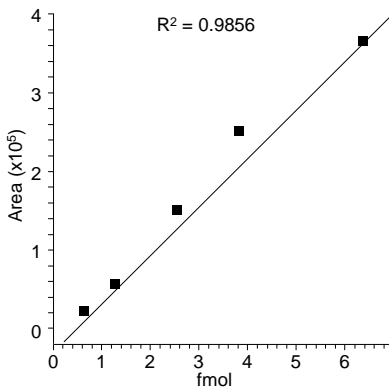

IGK (TVAAPSVFIFPPSDEQLK)

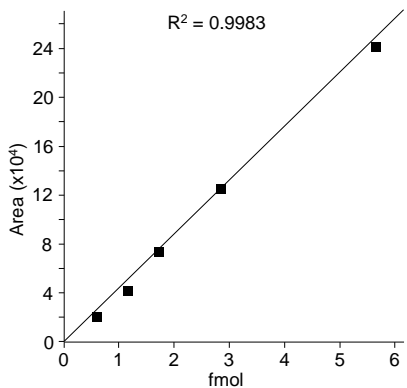

IGK (SGTASVCLLNIFYPR)

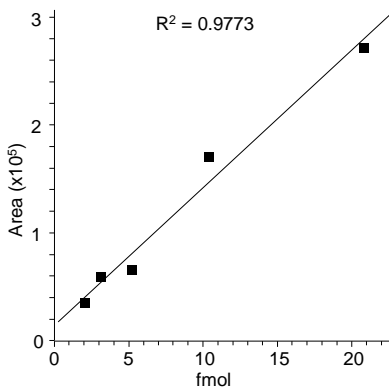

IGK (VDNALQSGNSQESVTEQDSK)

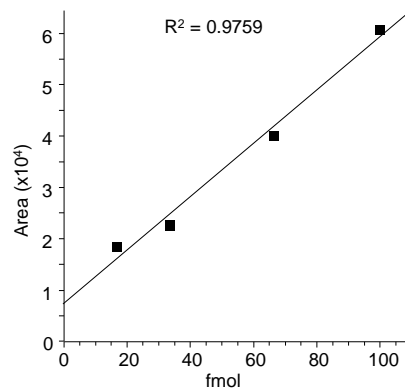

IGL (AAPSVTLFPPSSEELQANK)

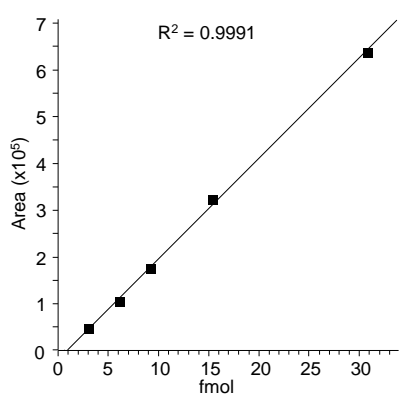

IGL (AGVETTPSK)

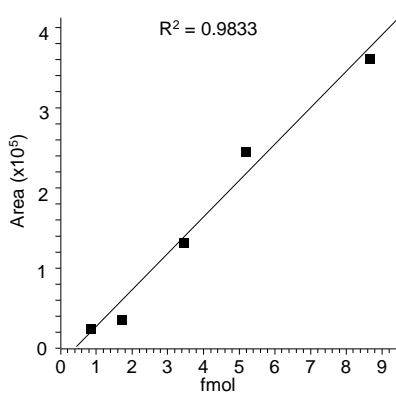

IGL (YAASSYLSLTPEQWK)

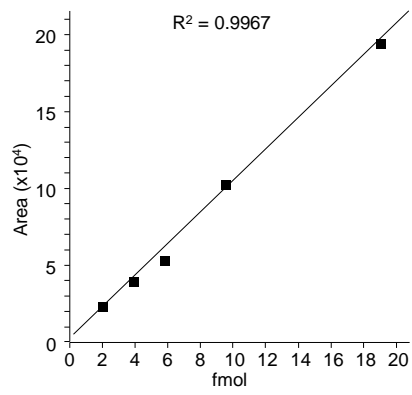

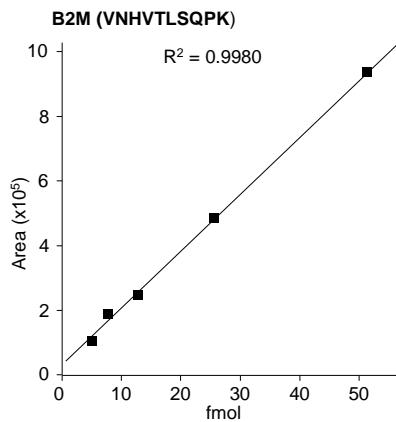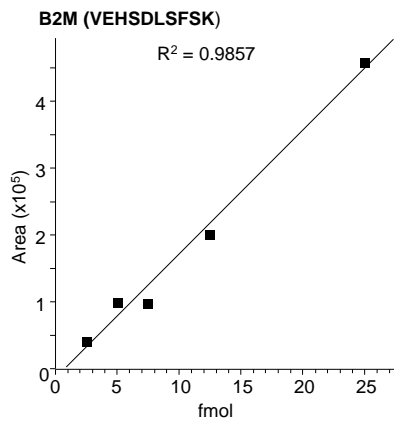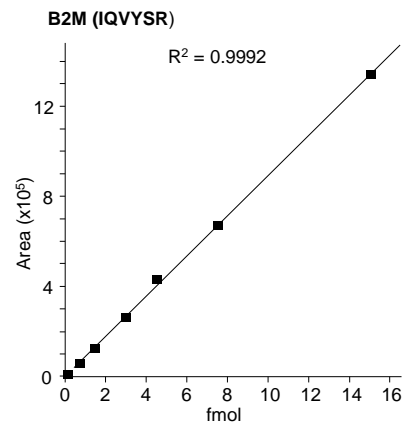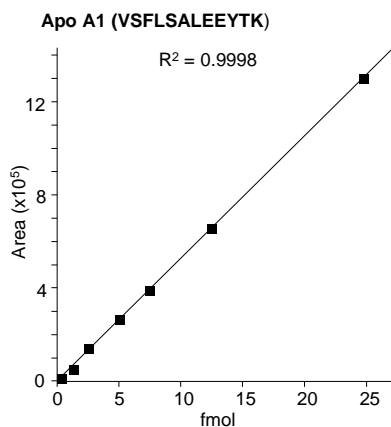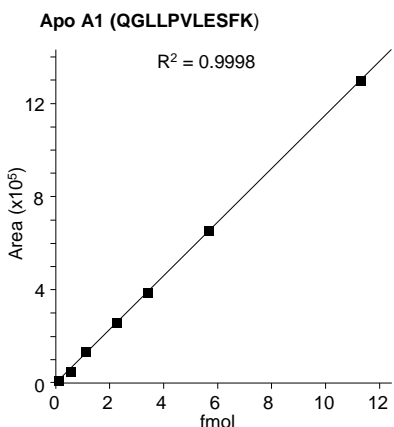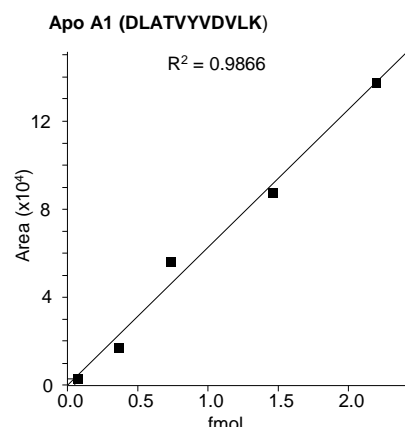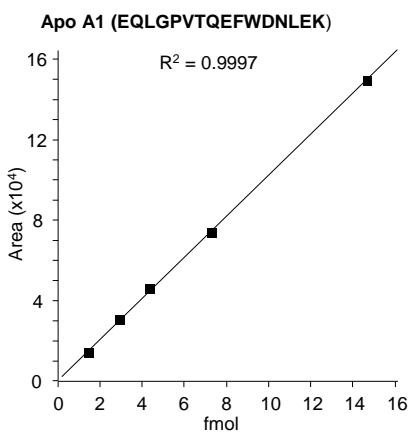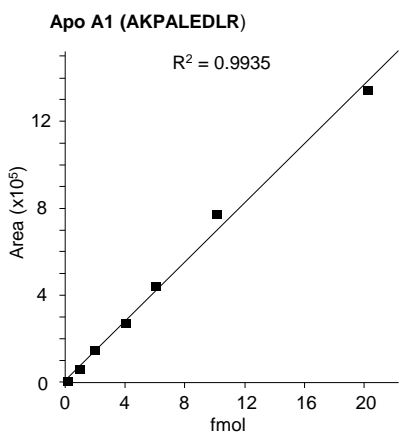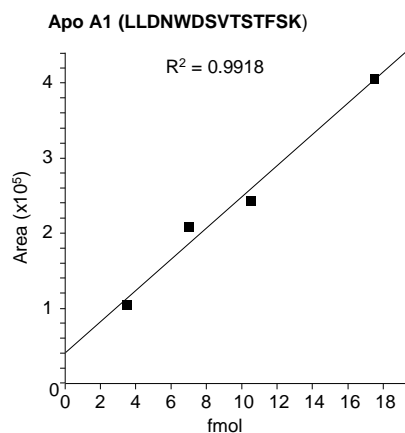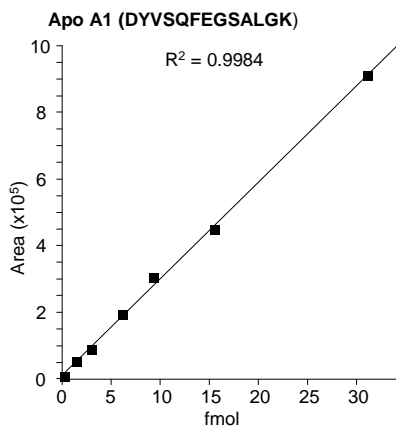

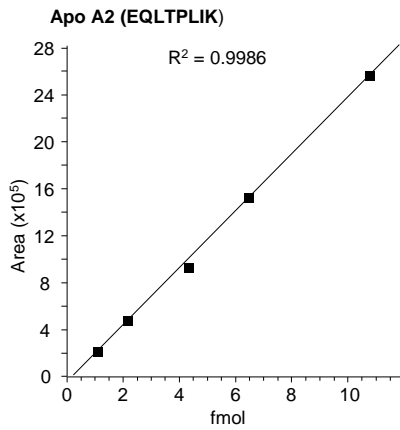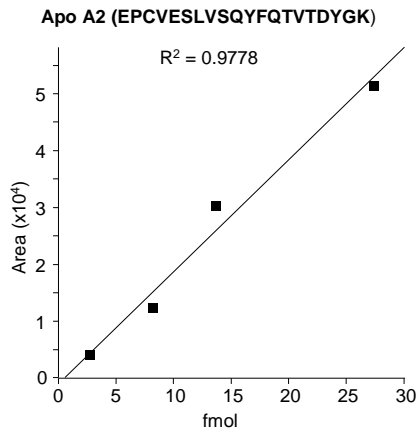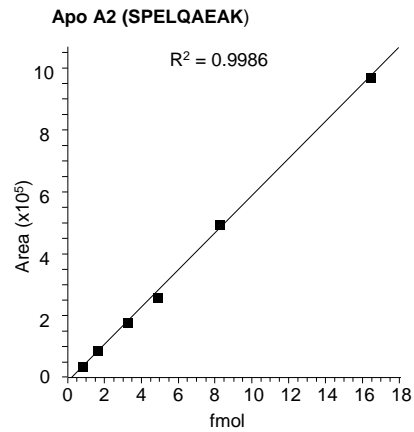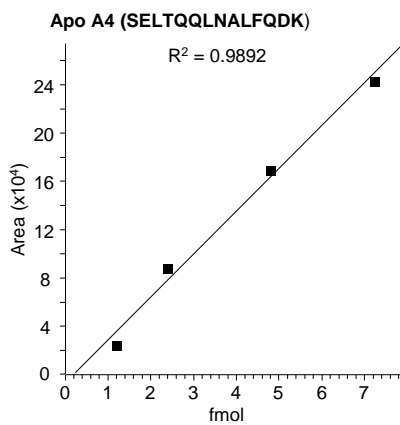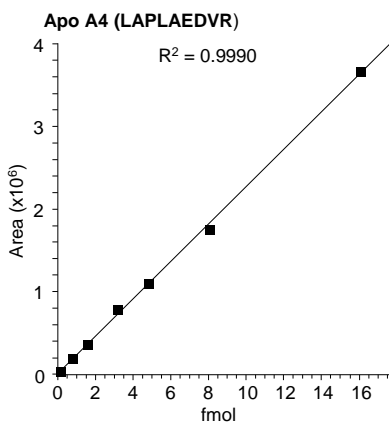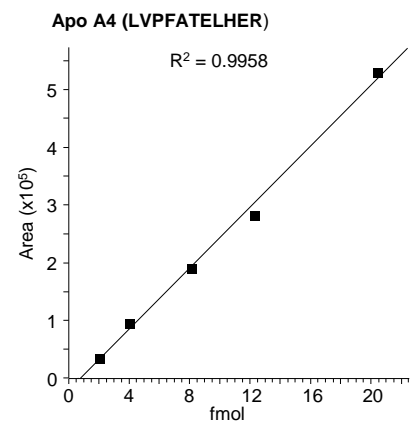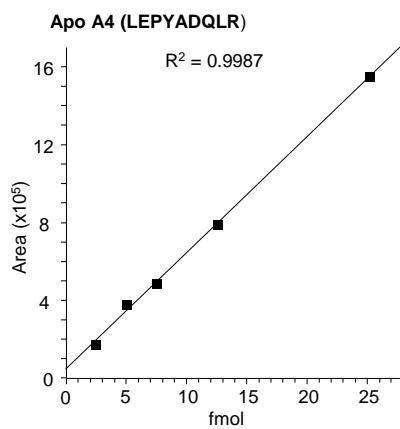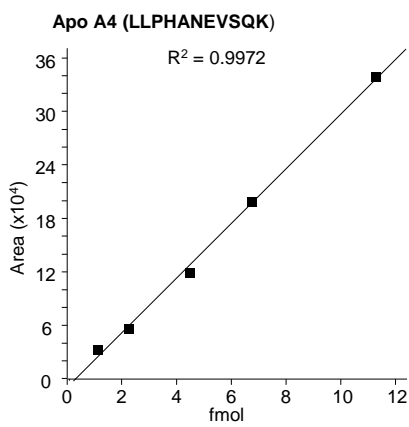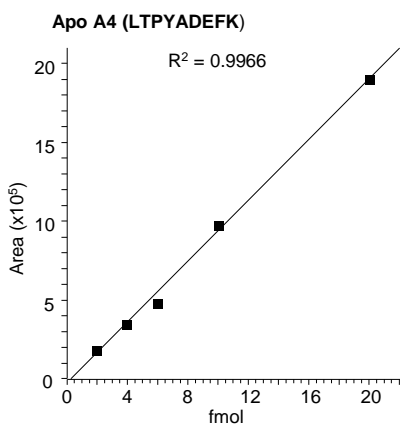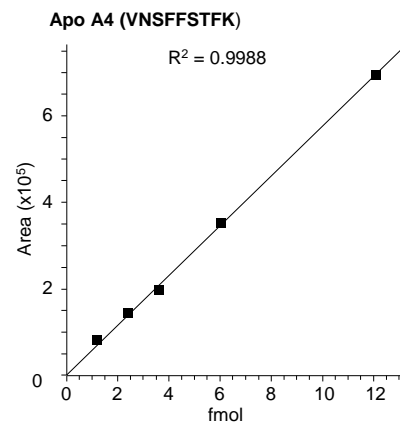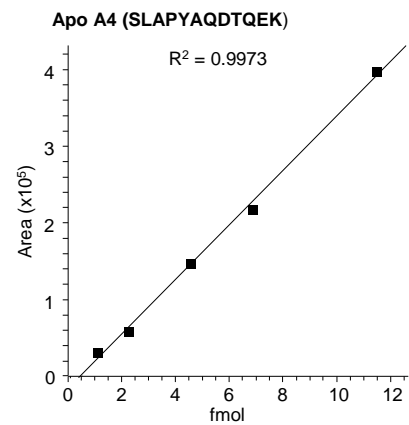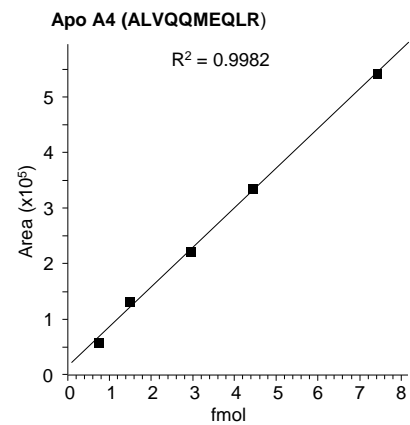

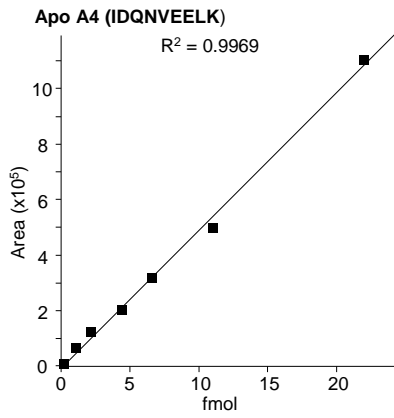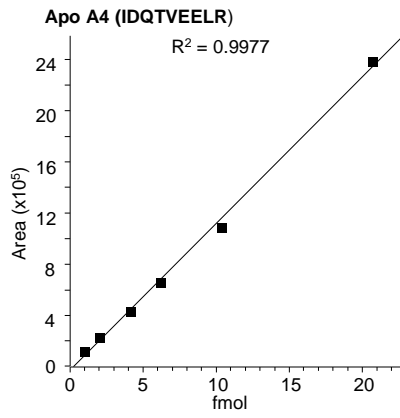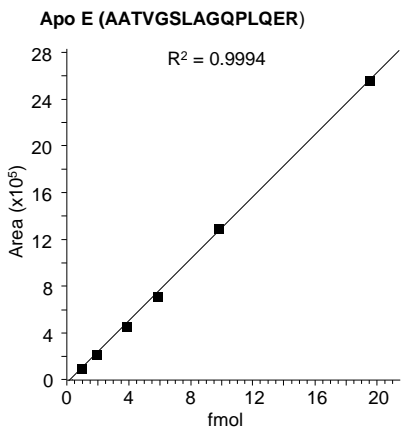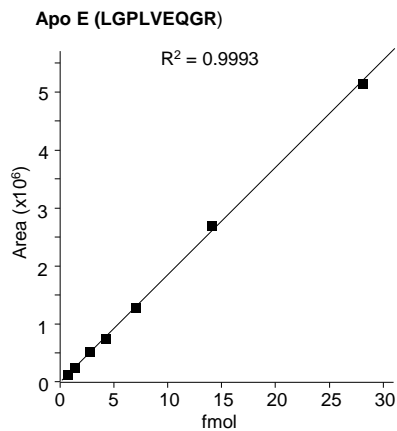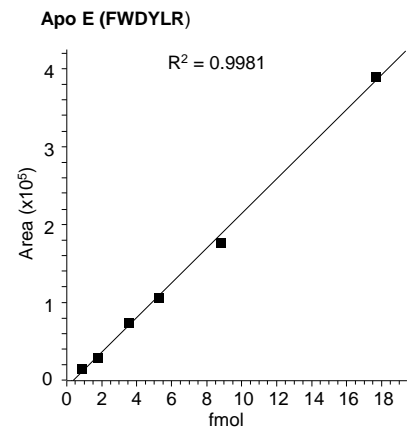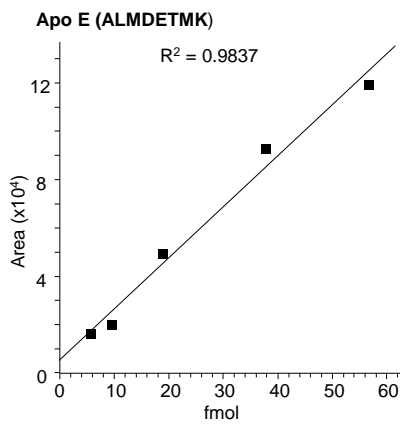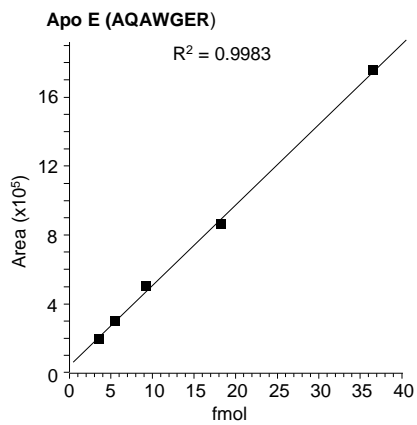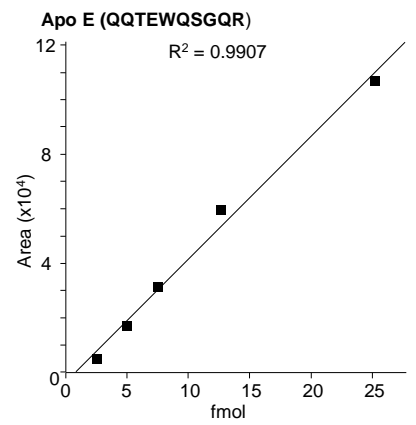

Gelsolin (HVPNEVVVQR)

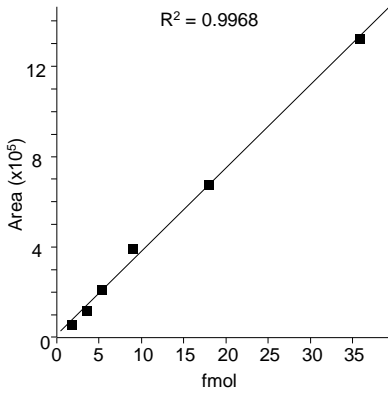

Gelsolin (EVQGFESATFLGYFK)

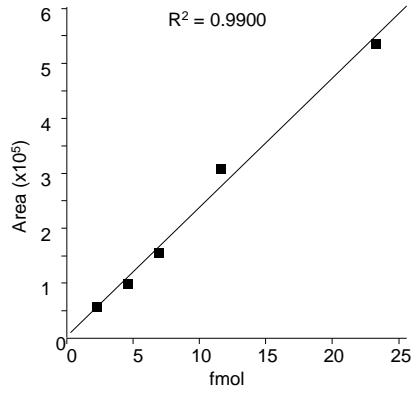

Gelsolin (TGAQELLR)

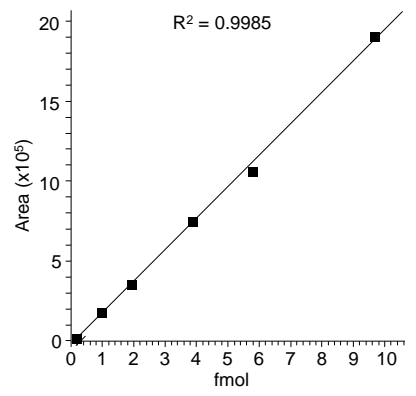

Gelsolin (QTQVSVLPEGGETPLFK)

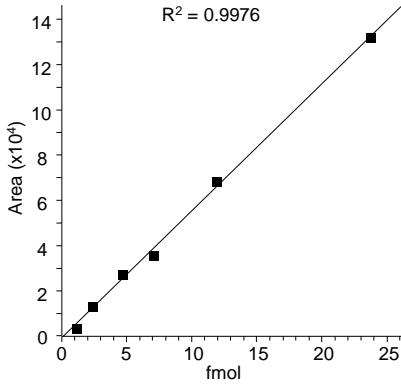

Gelsolin (AGALNSNDAFVLK)

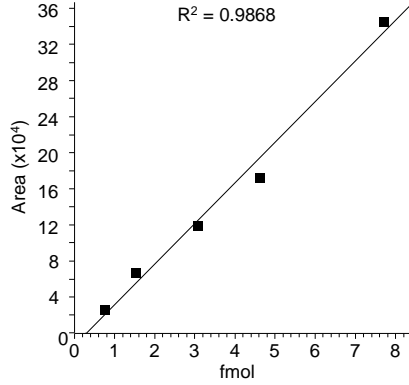

Gelsolin (AVEVLPK)

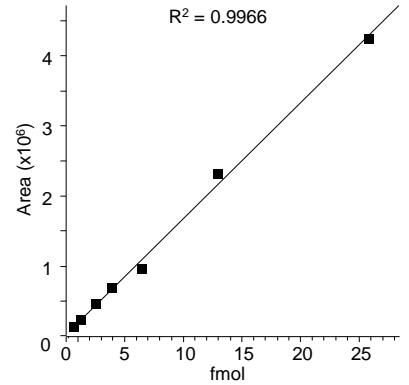

Gelsolin (TPITVVK)

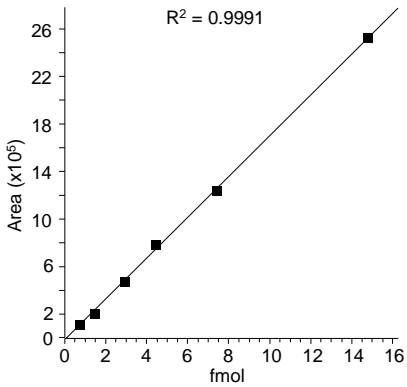

Gelsolin (EPGLQIWR)

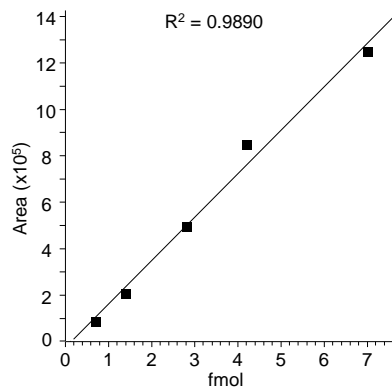

Gelsolin (AQPVQVAEGSEPDGFWEALGGK)

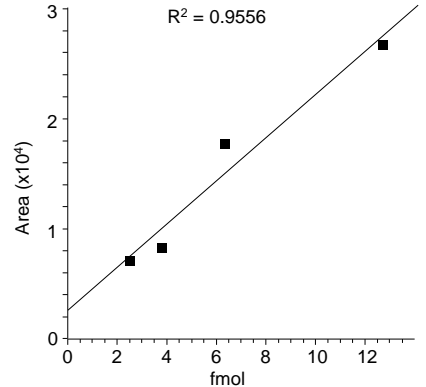

FGA (GLIDEVNQDFTNR)

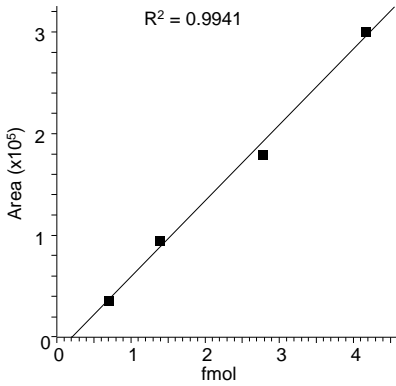

FGA (HPDEAAFFDTASTGK)

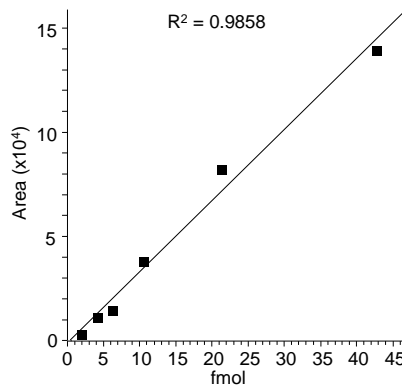

FGA (QLEQVIK)

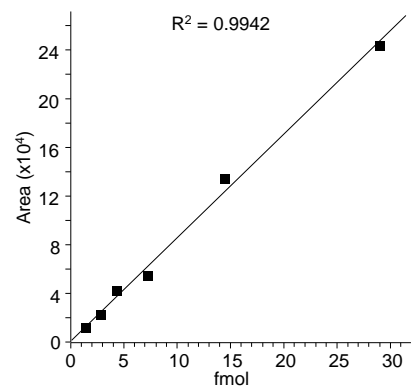

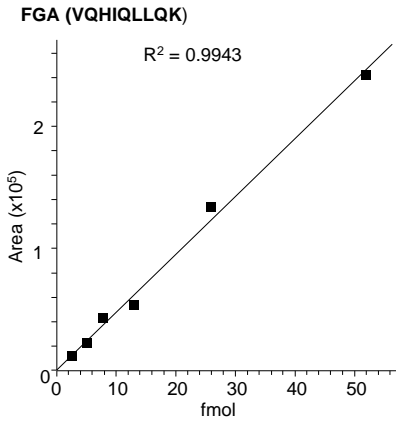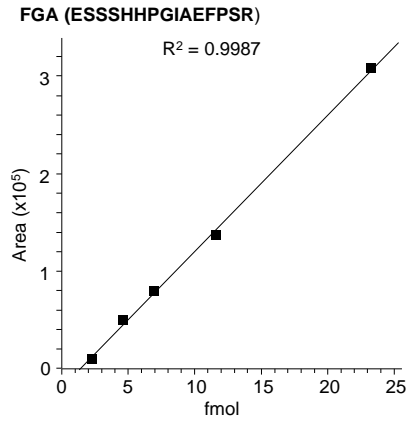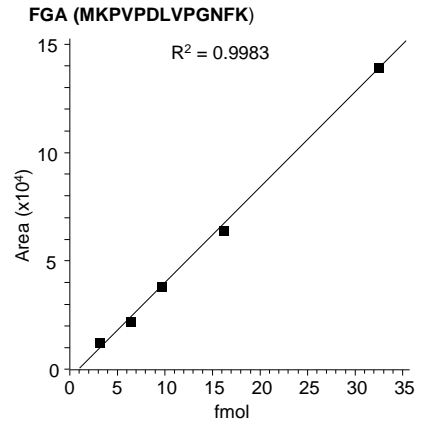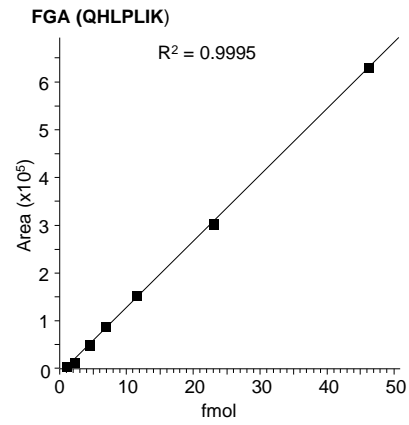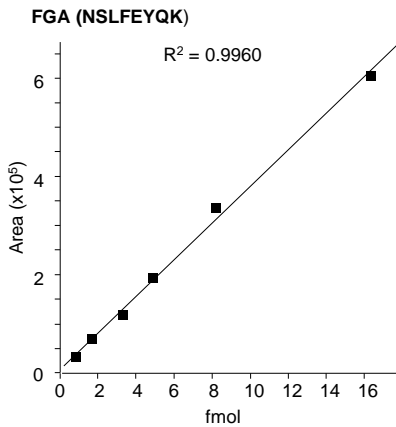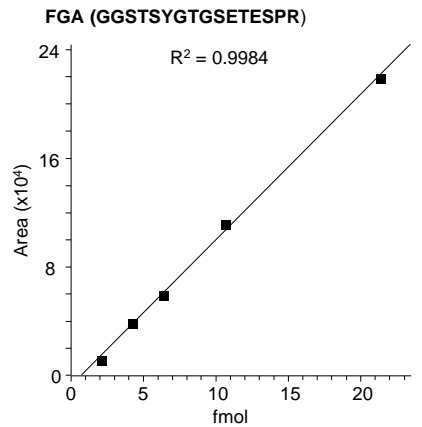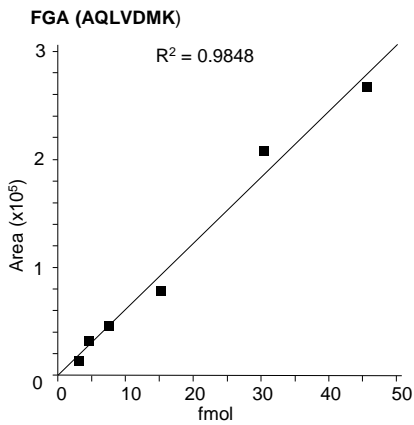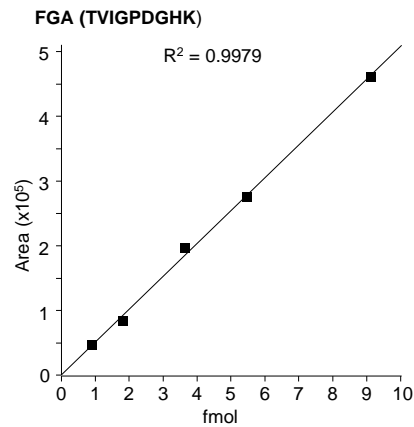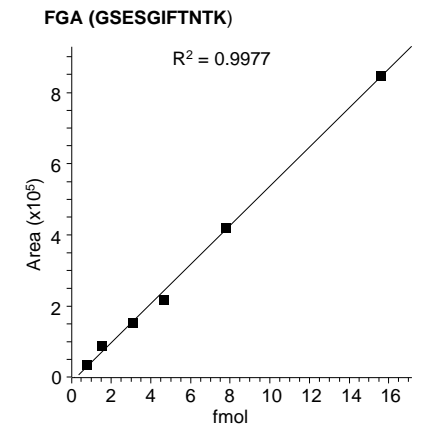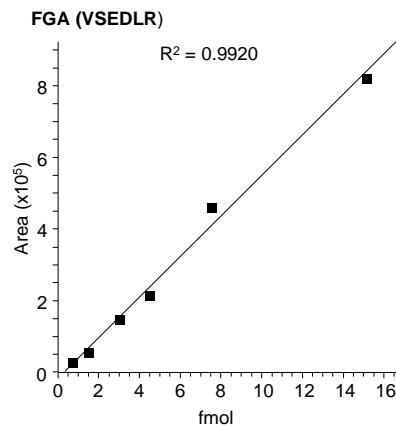

LECT2 (LGTLPLQK)

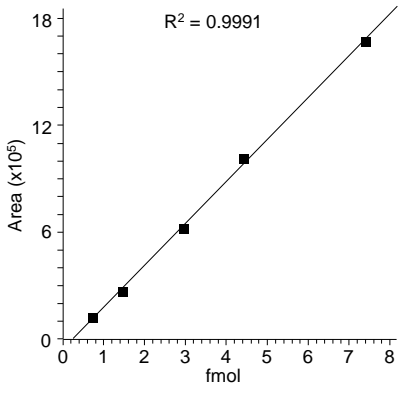

LECT2 (SSNEIR)

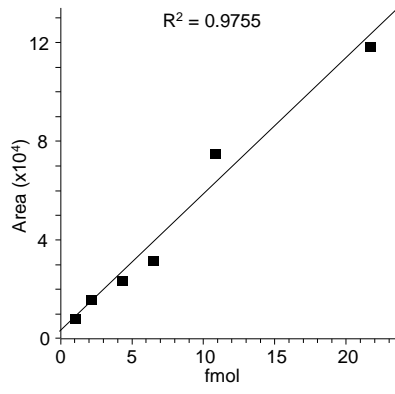

LECT2 (NAINNGVR)

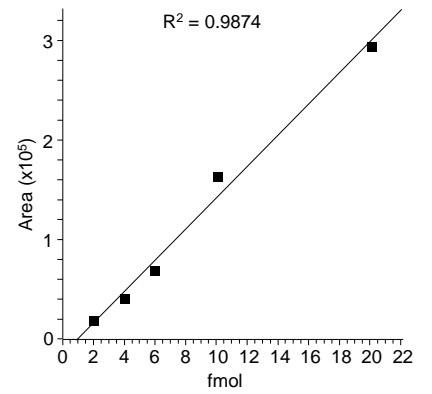

Lysozyme (STDYGFQINSR)

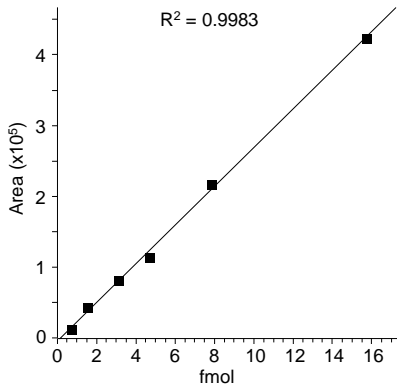

Lysozyme (AWVAWR)

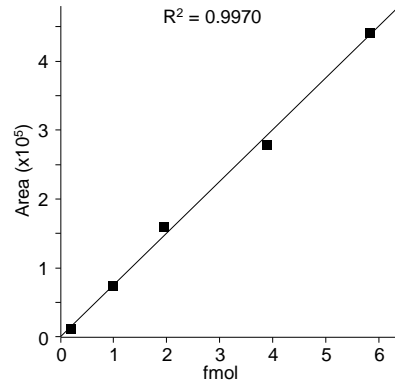

Lysozyme (TPGAVNACHLSCSALLQDNIADAVACAK)

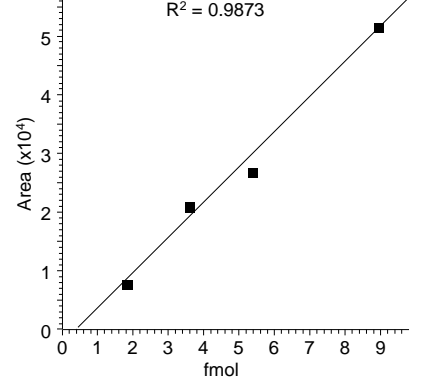

Lysozyme (LGMDGYR)

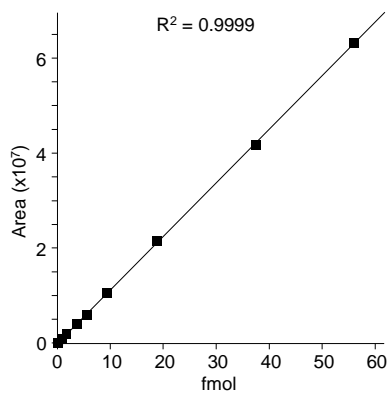

Lysozyme (WESGYNTR)

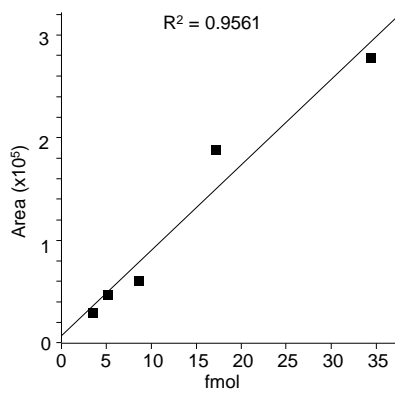

Supplement: pone.0235143.s002.pdf [file pone.0235143.s002.pdf]
