# Supplementary material for: Mass spectrometry-based absolute quantification of amyloid proteins in pathology tissue specimens: Merits and limitations
Source: PubMed Central journal article supplement (PMC7329117; doi:10.1371/journal.pone.0235143), 2020-07-01

### **S3 Appendix.**

#### **Chromatogram of precursor ions and spectrum of fragmentation ions for a representative peptide of quantified amyloid proteins.**

Case ID (e.g. P1) and raw file ID (e.g. A003) correspond to the ID numbers shown in S3 Table.

(A) and (M) serum amyloid A (SAA)  
(B) and (N) transthyretin (TTR),  
(C) and (O) immunoglobulin kappa light chain (IGK),  
(D) and (P) immunoglobulin lambda light chain (IGL),  
(E) and (Q) beta-2-microglobulin (B2M),  
(F) and (R) apolipoprotein (Apo) A1,  
(G) and (S) Apo A2,  
(H) and (T) Apo A4,  
(I) and (U) Apo E  
(J) and (V) gelsolin,  
(K) and (W) fibrinogen alpha chain (FGA),  
(L) and (X) lysozyme

(A-L) specimens are derived from the heart, and (M-X) from other organs.

# A SAA (EANYIGSDK) Heart

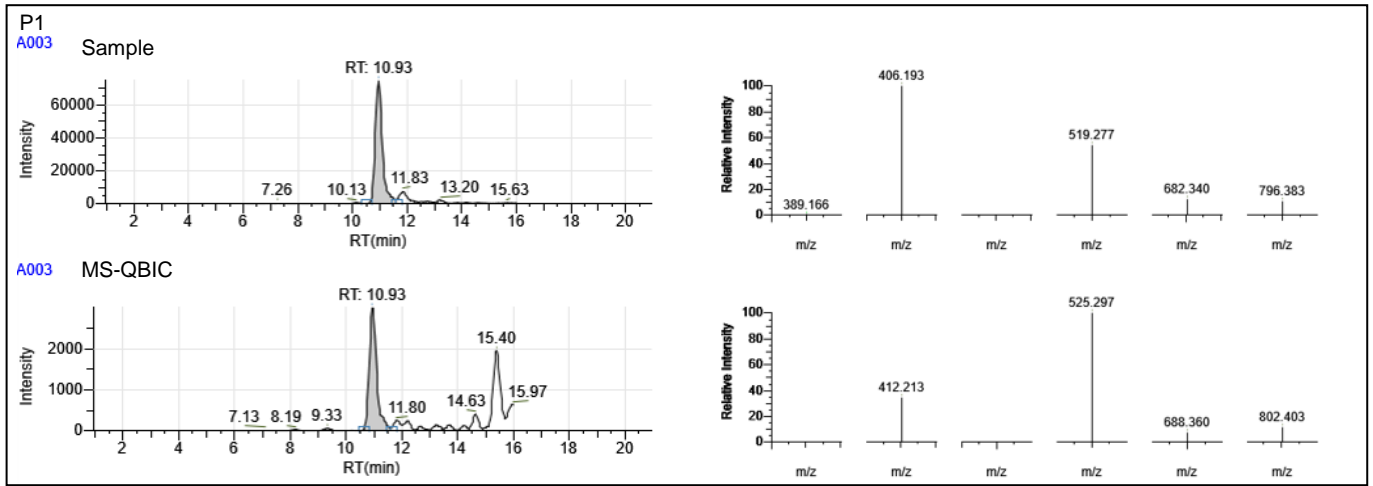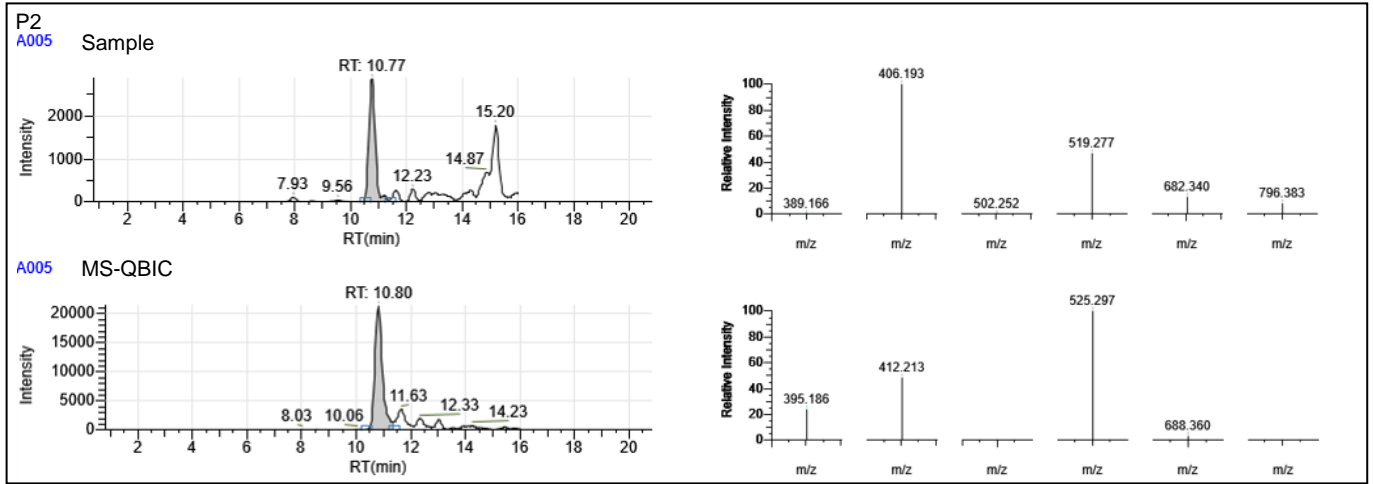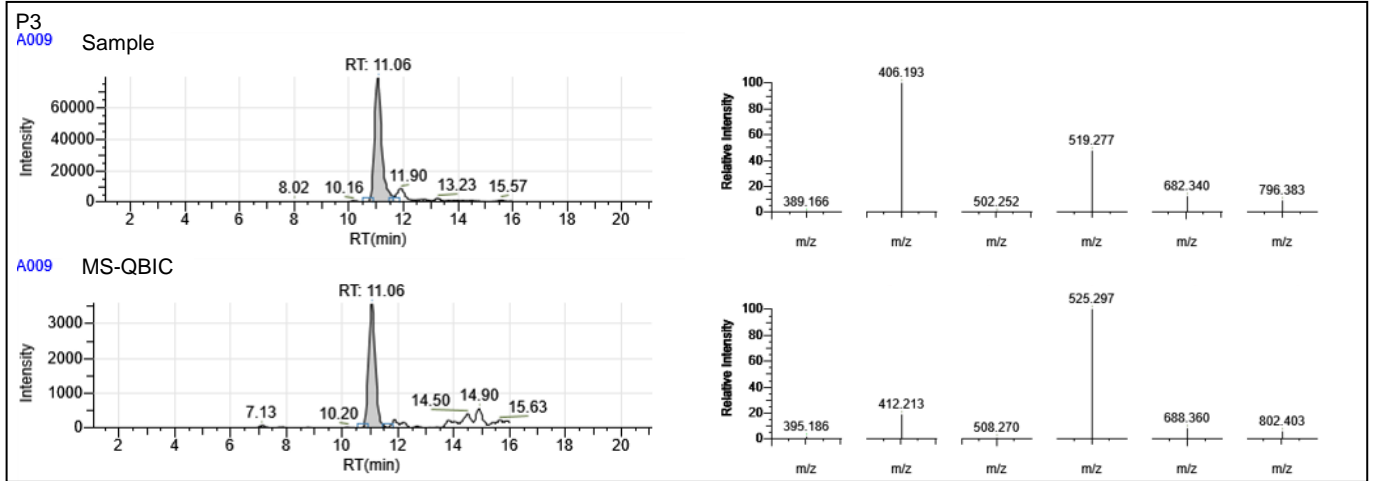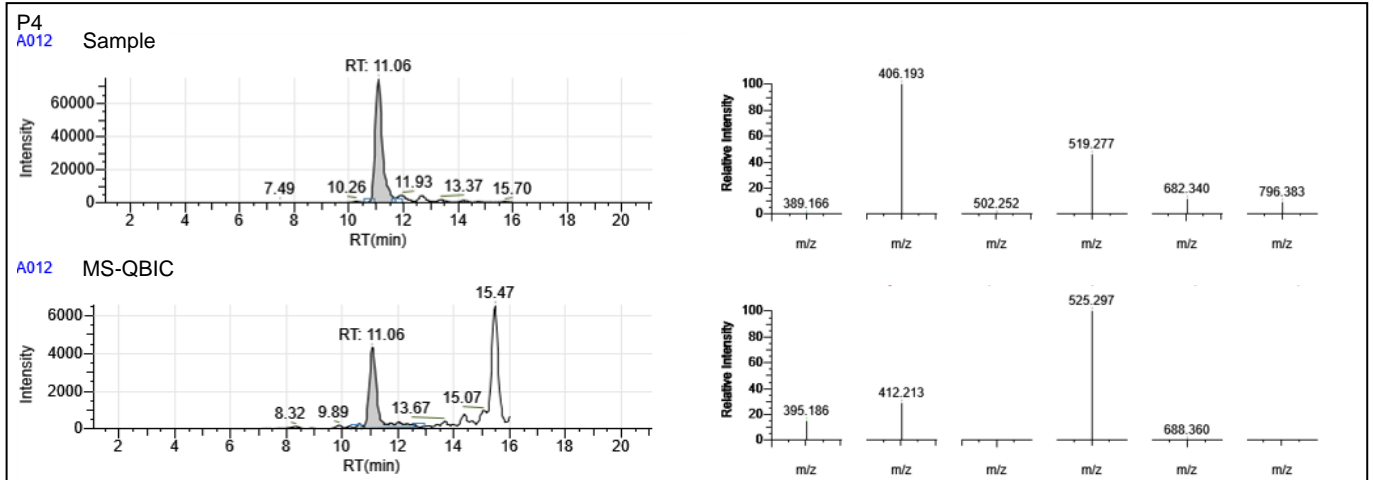



P5  
A015 Sample

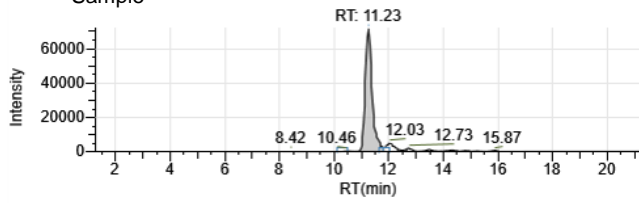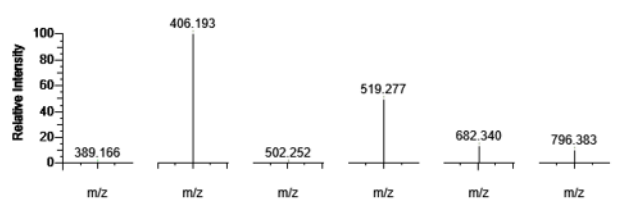

A015 MS-QBIC

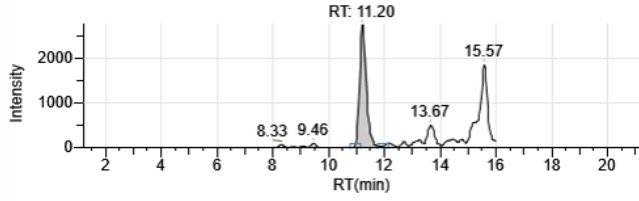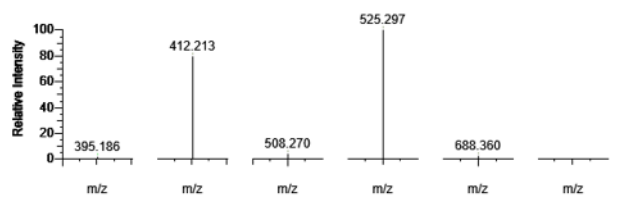

P6  
A018 Sample

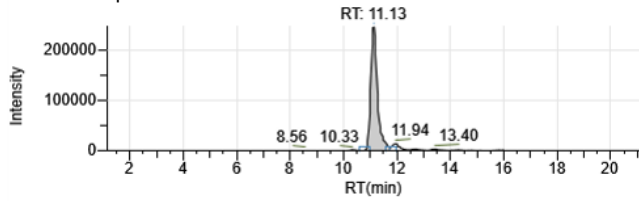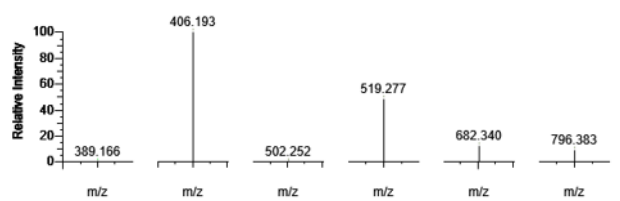

A018 MS-QBIC

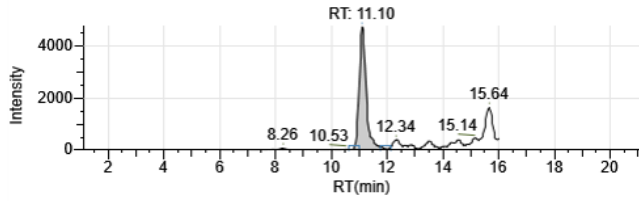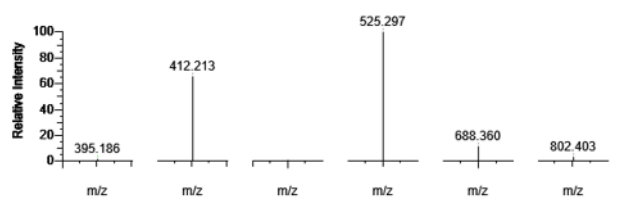

P7  
A077 Sample

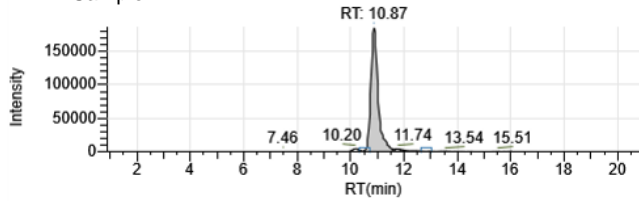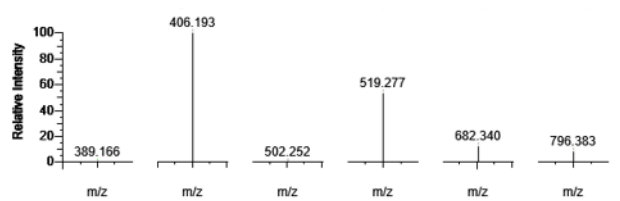

A077 MS-QBIC

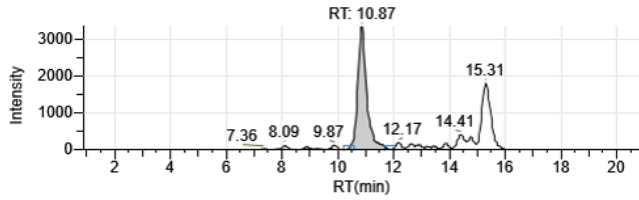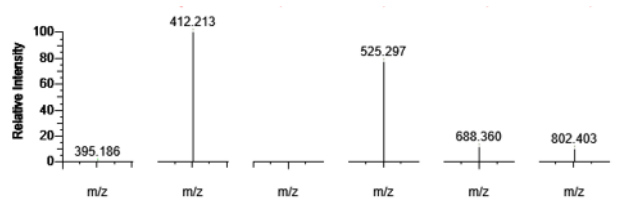

P8  
A019 Sample

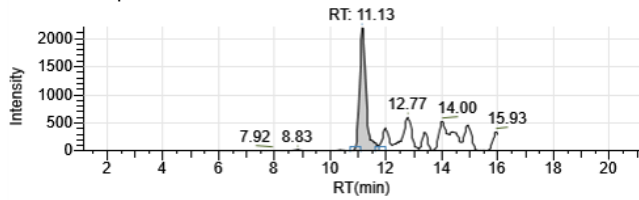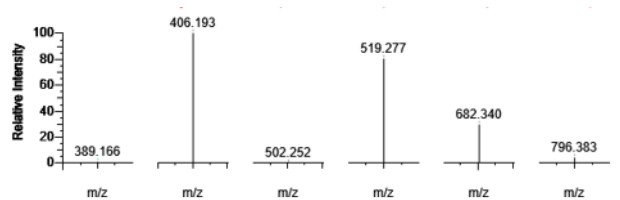

A019 MS-QBIC

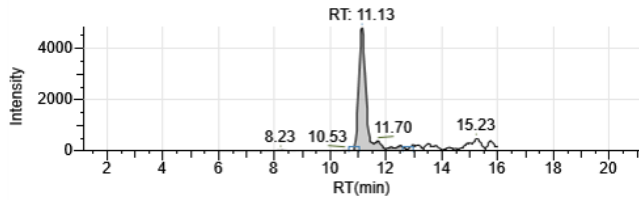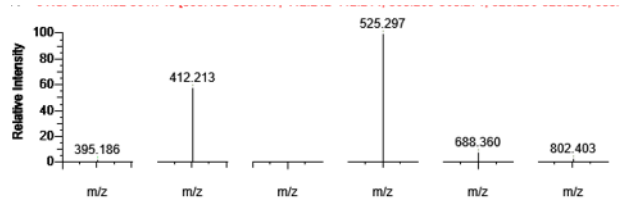

P15  
A033 Sample

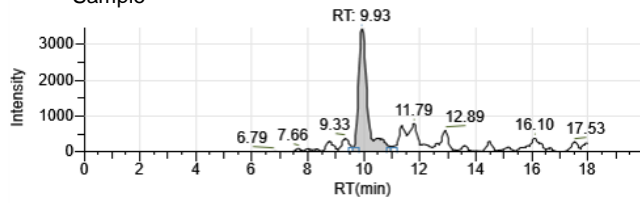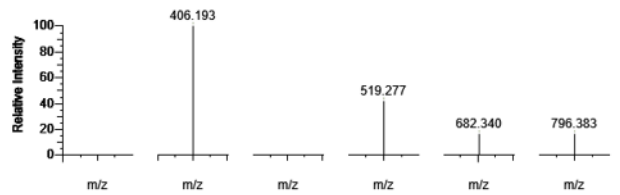

A033 MS-QBIC

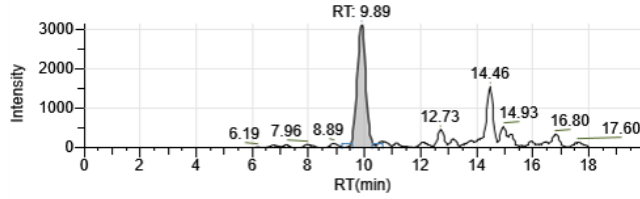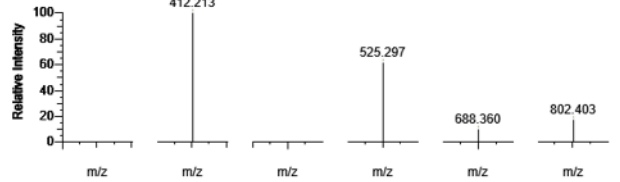

P16  
A090 Sample

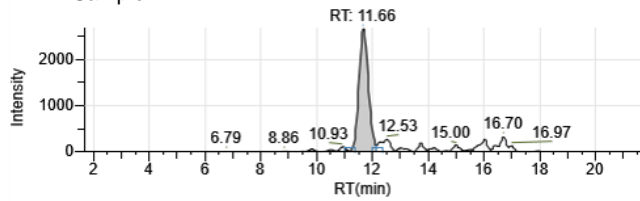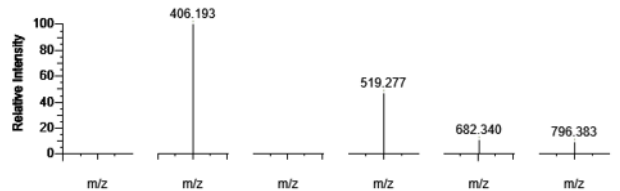

A090 MS-QBIC

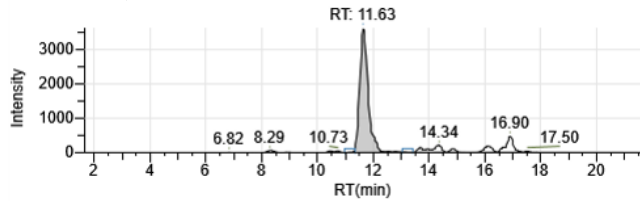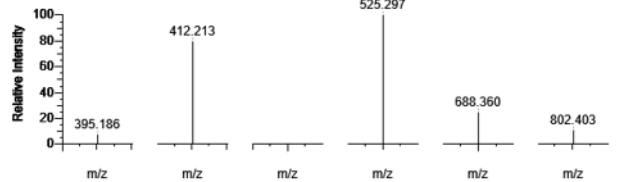

P17  
A048 Sample

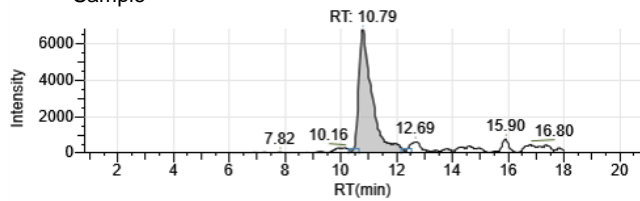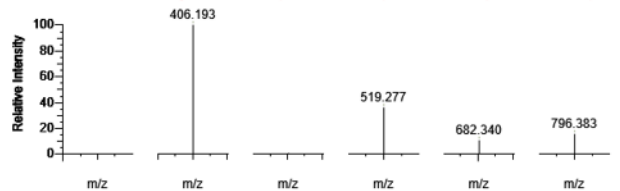

A048 MS-QBIC

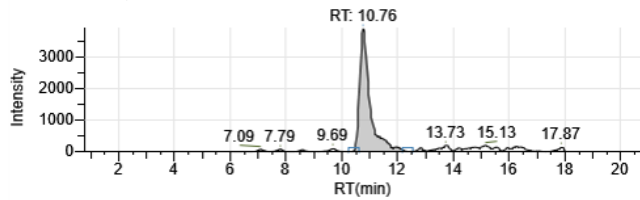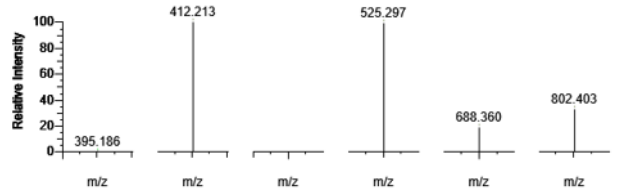

P18  
A051 Sample

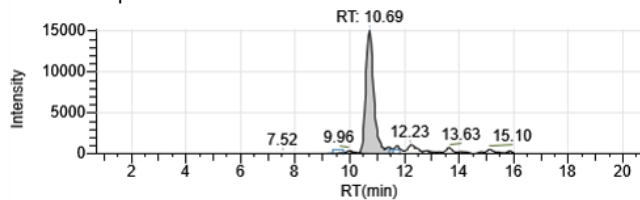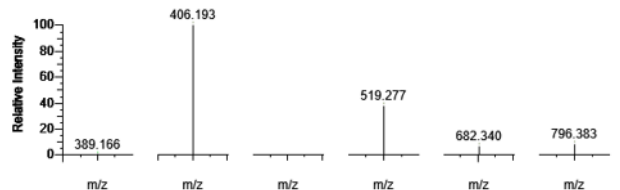

A051 MS-QBIC

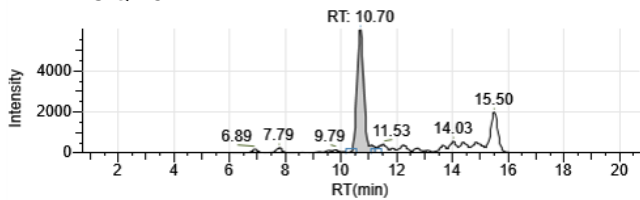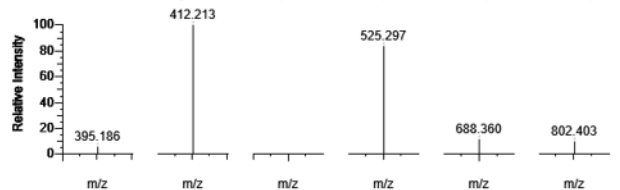

P19  
A053

Sample

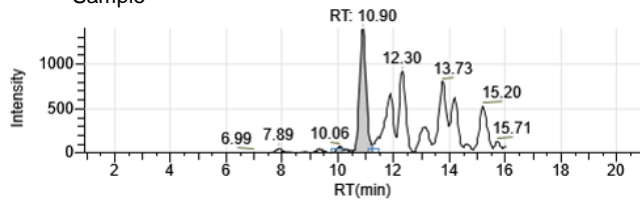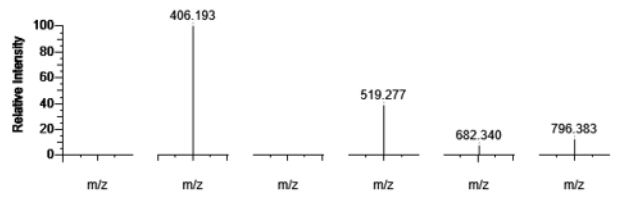

A053 MS-QBIC

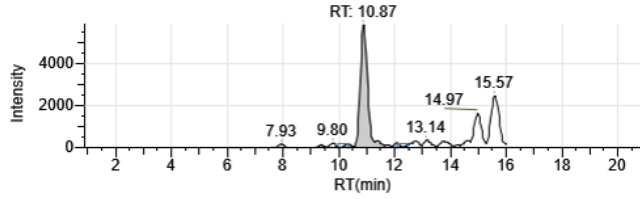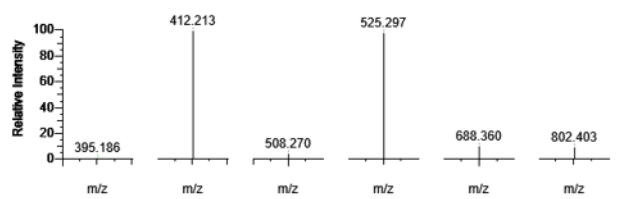

P21  
A064

Sample

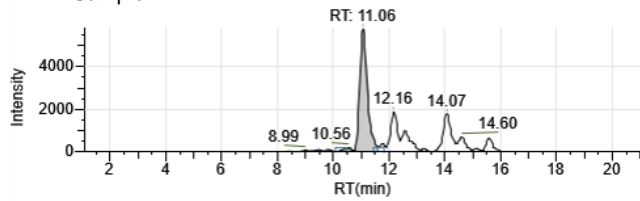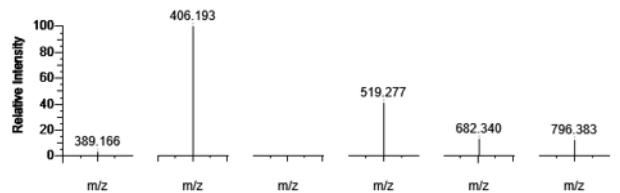

A064 MS-QBIC

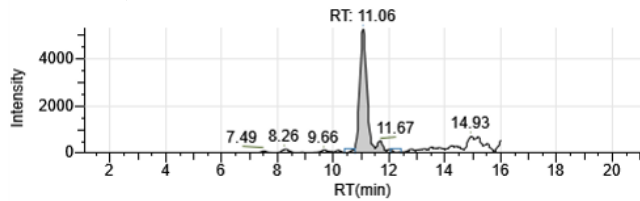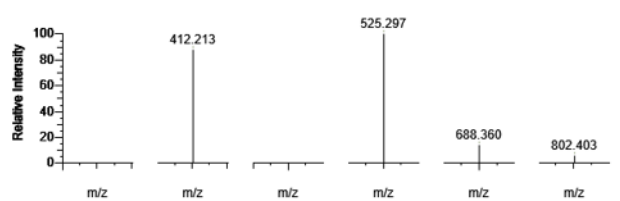

P23  
A083

Sample

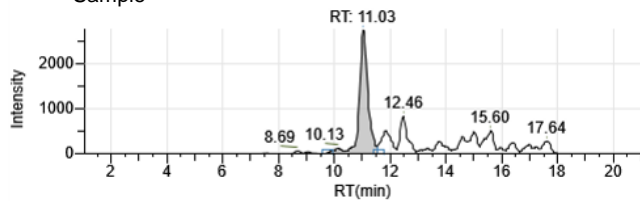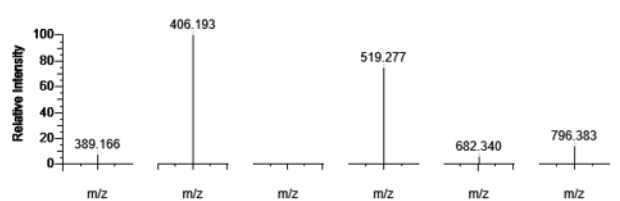

A083 MS-QBIC

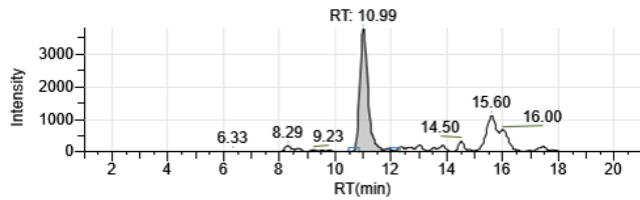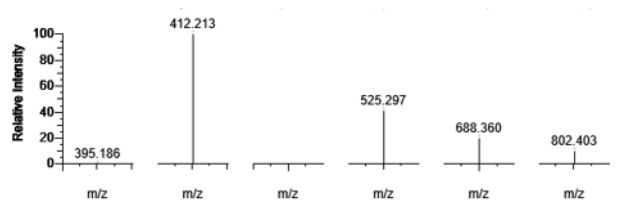

P30  
A081

Sample

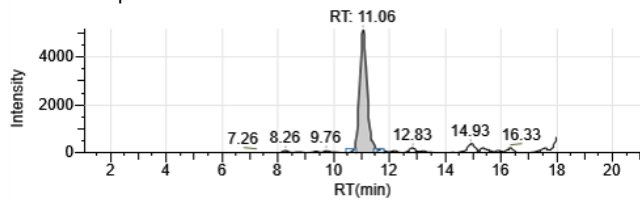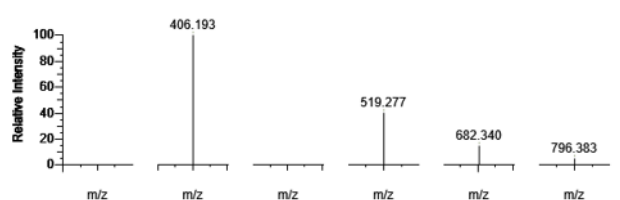

A081 MS-QBIC

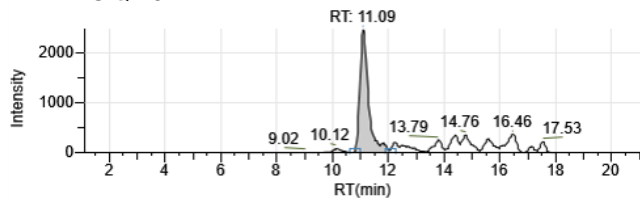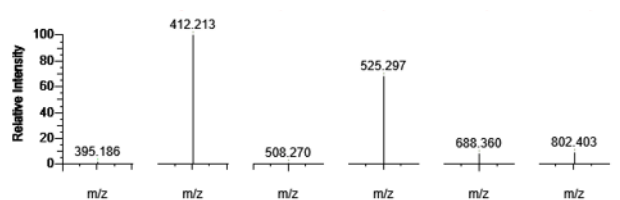

# B TTR (AADDTWEPFASGK) Heart

P6  
A017 Sample

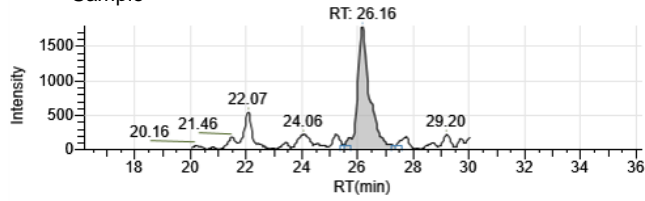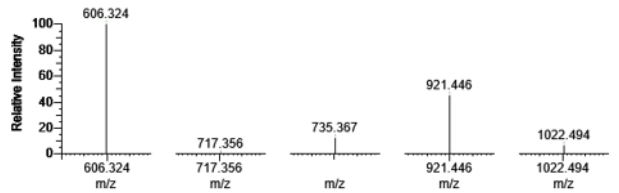

A017 MS-QBIC

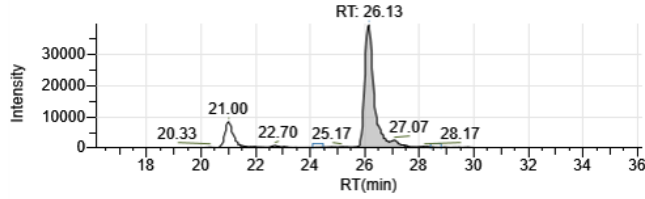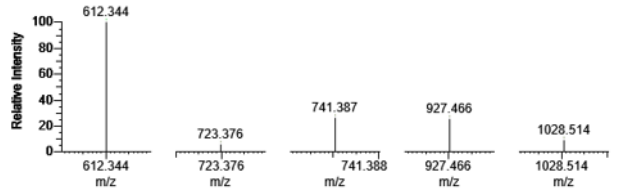

P8  
A019 Sample

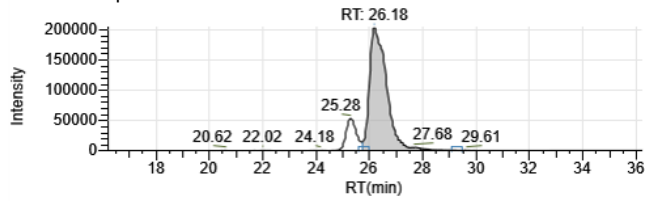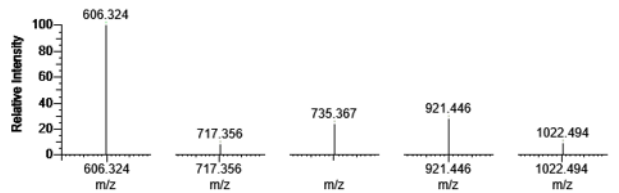

A019 MS-QBIC

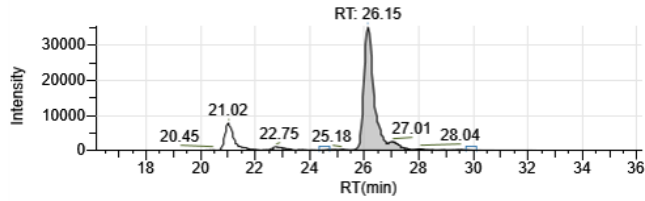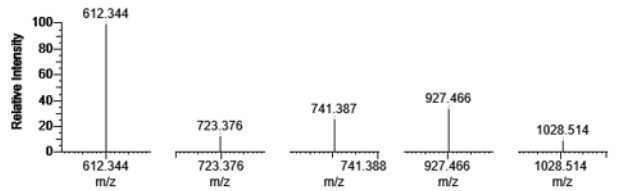

P9  
A022 Sample

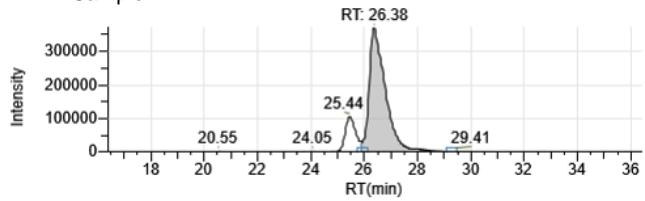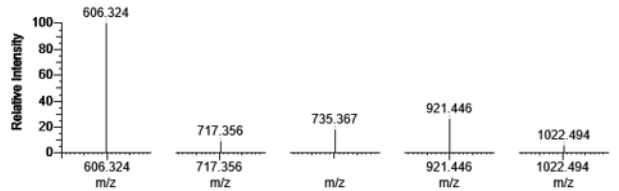

A022 MS-QBIC

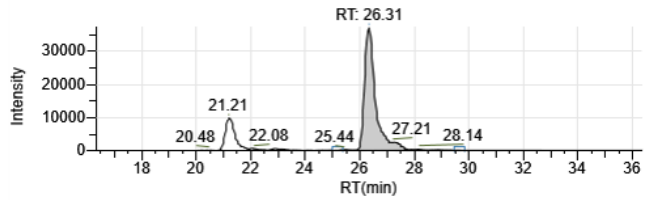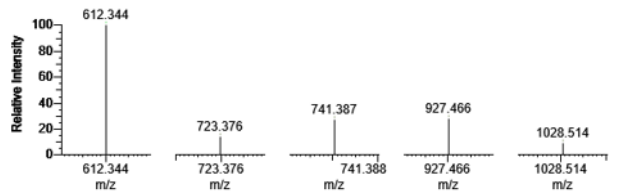

P10  
A026 Sample

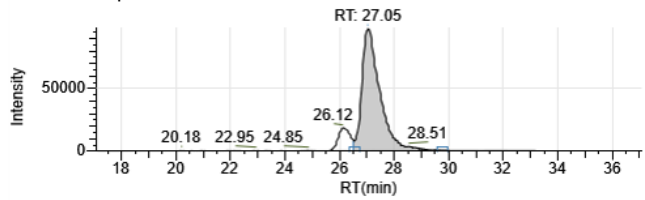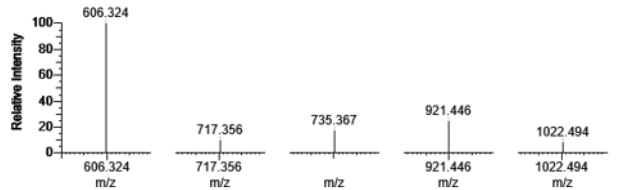

A026 MS-QBIC

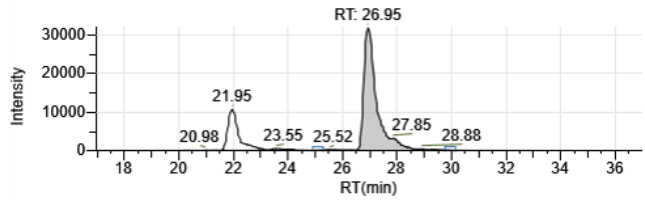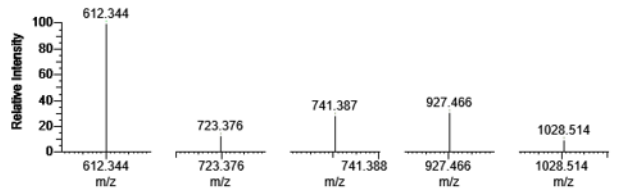

P11  
A029

Sample

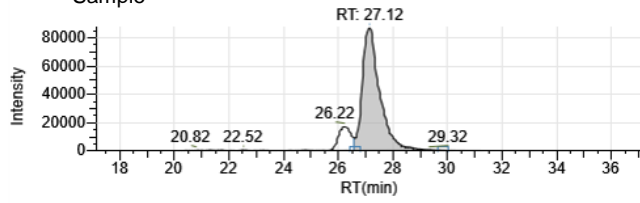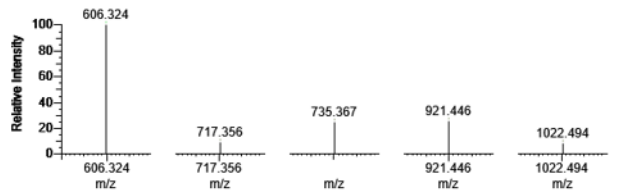

A029 MS-QBIC

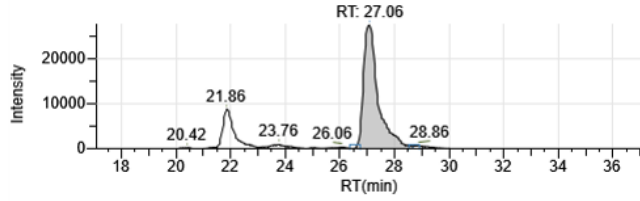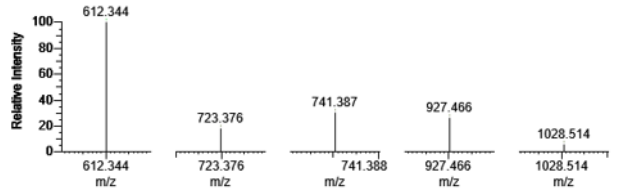

P12  
A032

Sample

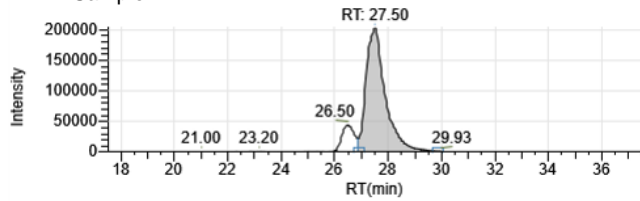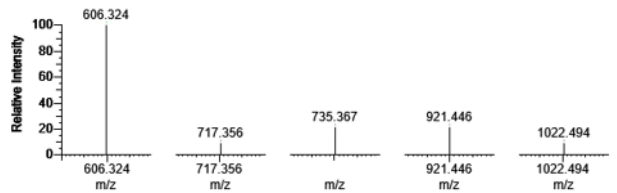

A032 MS-QBIC

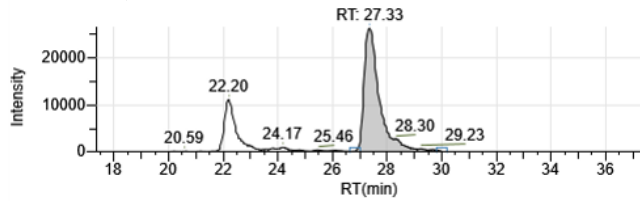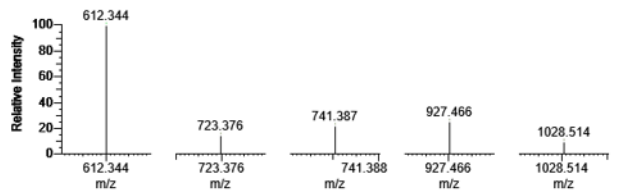

P13  
A035

Sample

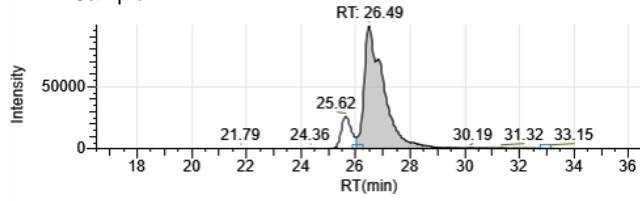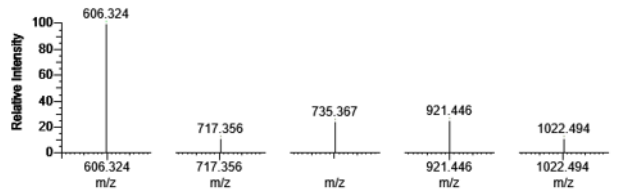

A035 MS-QBIC

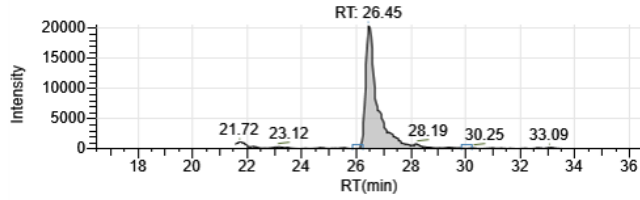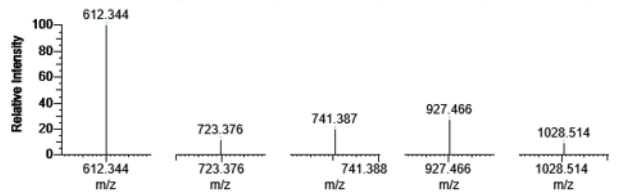

P14  
A039

Sample

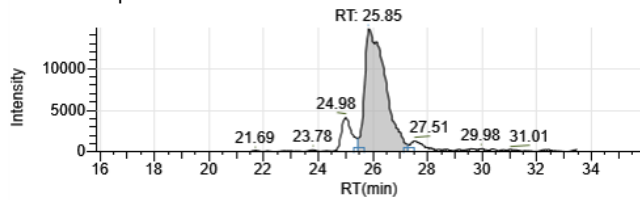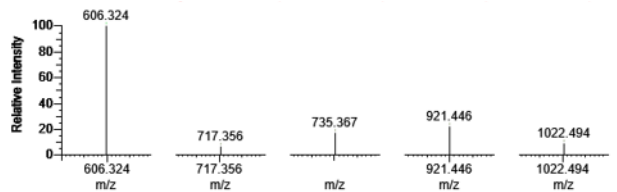

A039 MS-QBIC

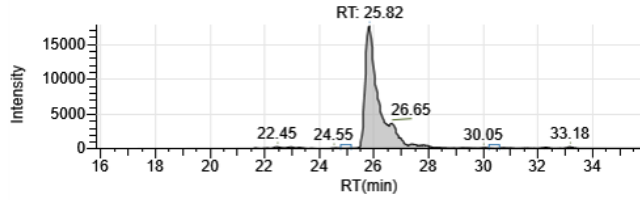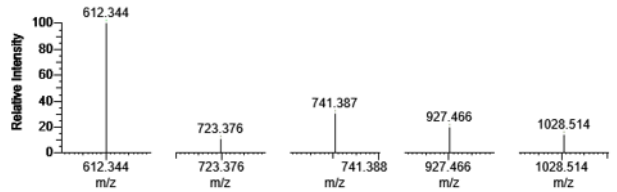

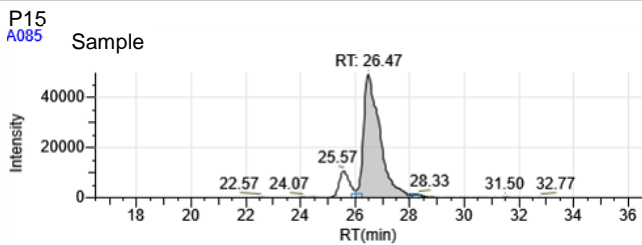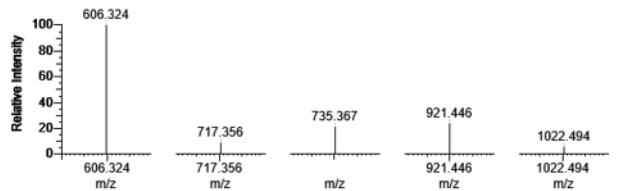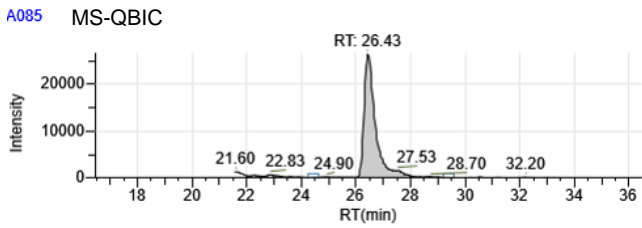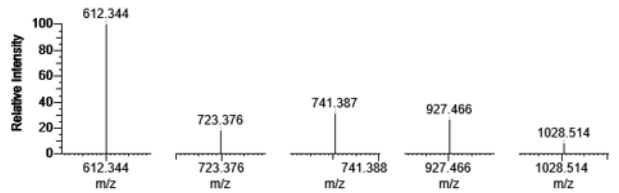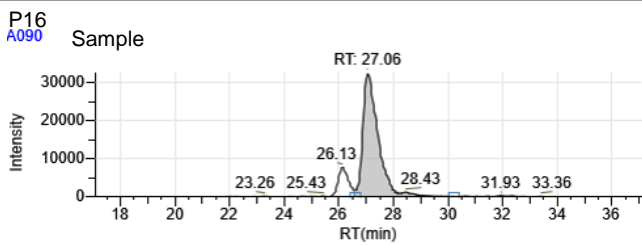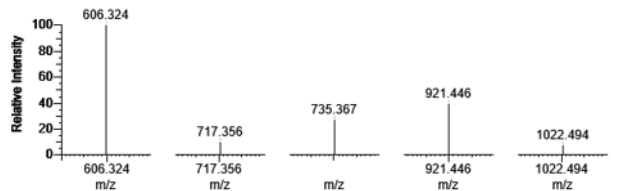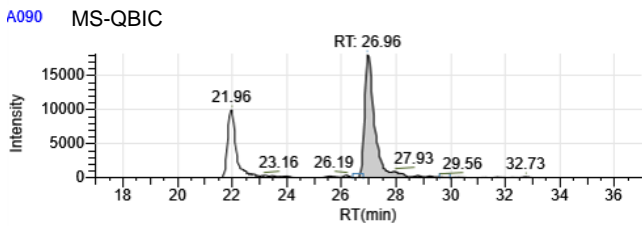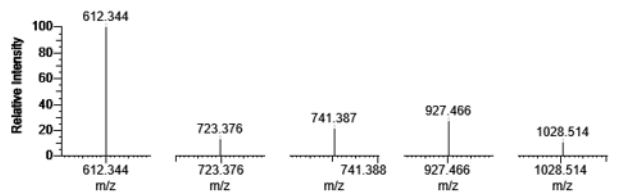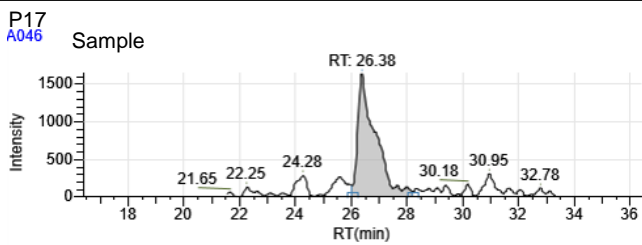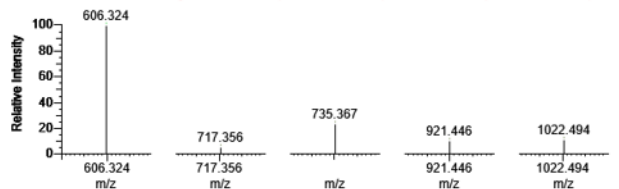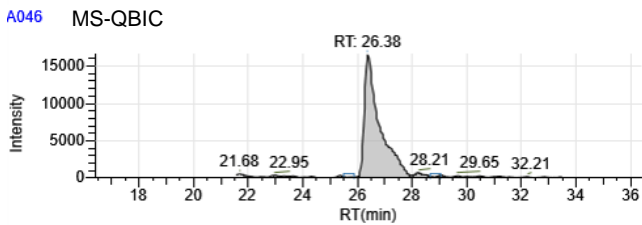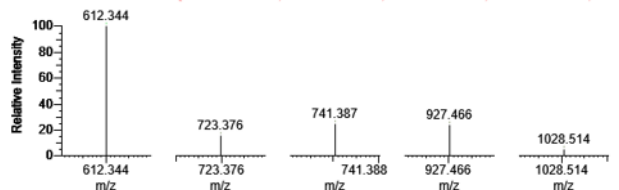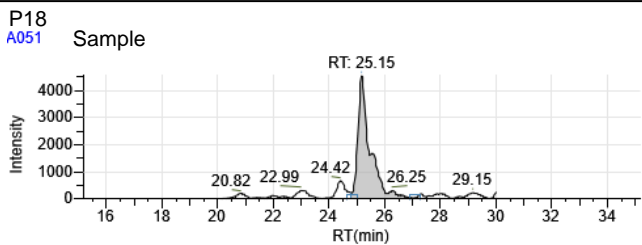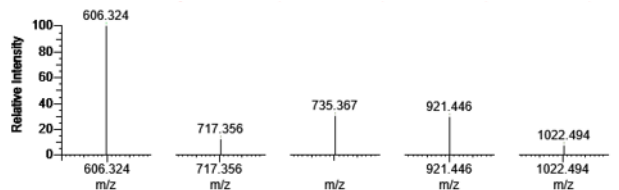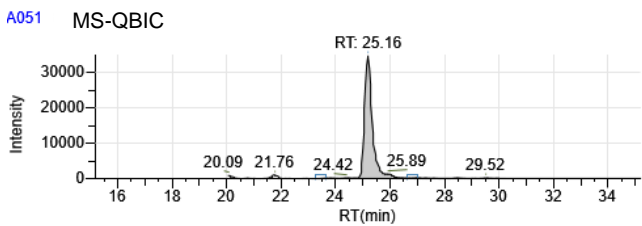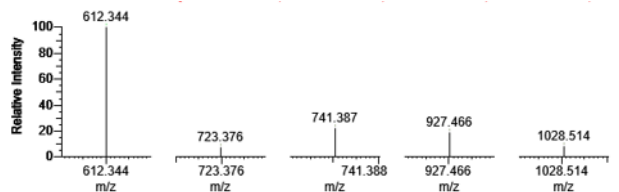

P19  
A053

Sample

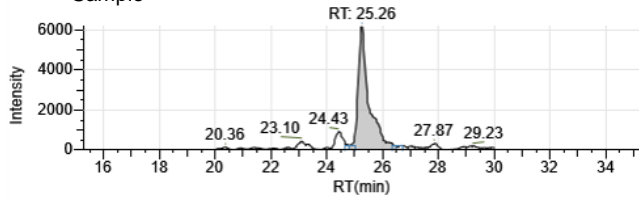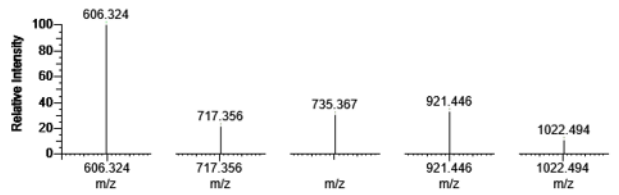

A053 MS-QBIC

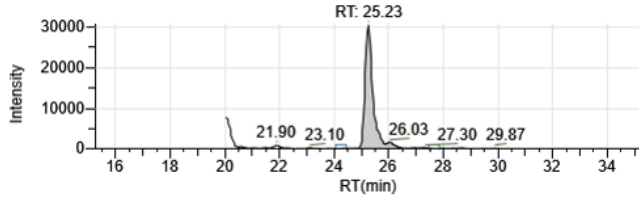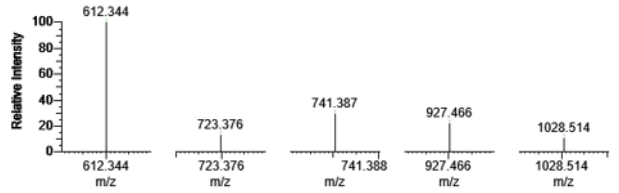

P20  
A063

Sample

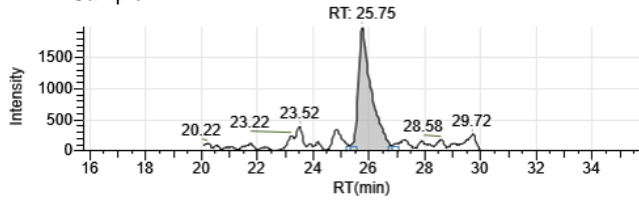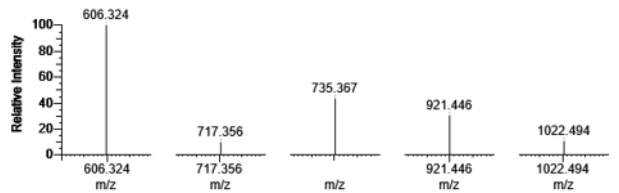

A063 MS-QBIC

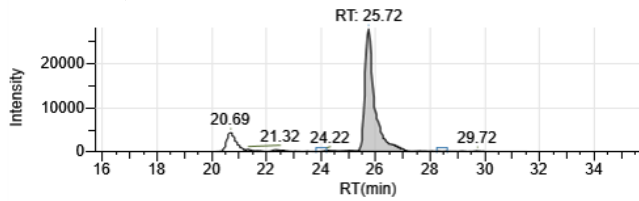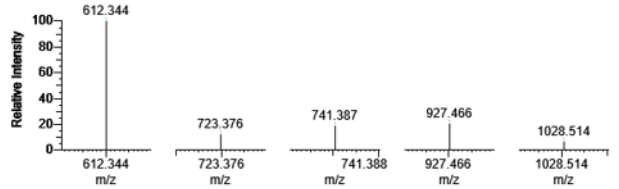

P22  
A042

Sample

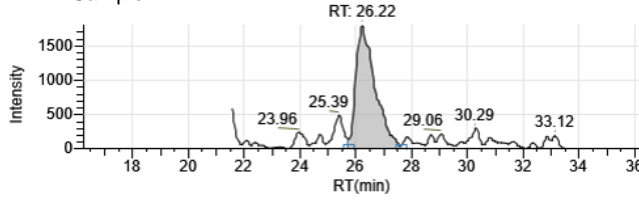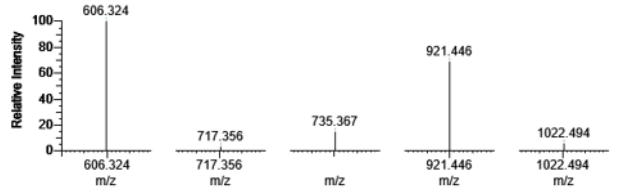

A042 MS-QBIC

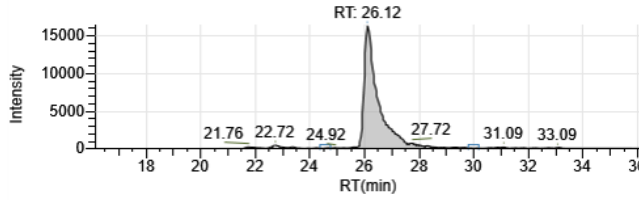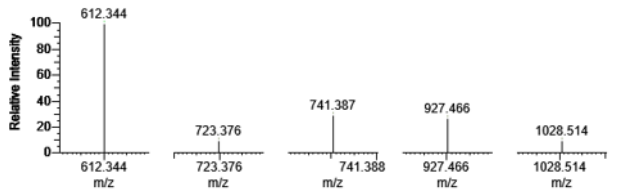

P23  
A082

Sample

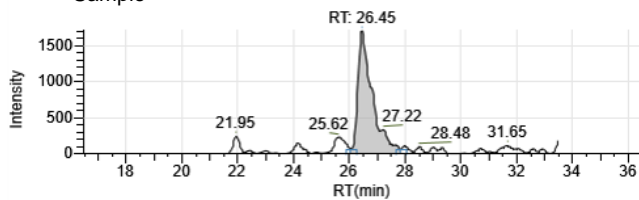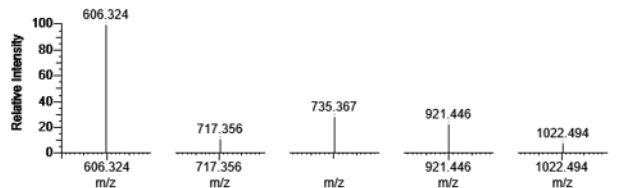

A082 MS-QBIC

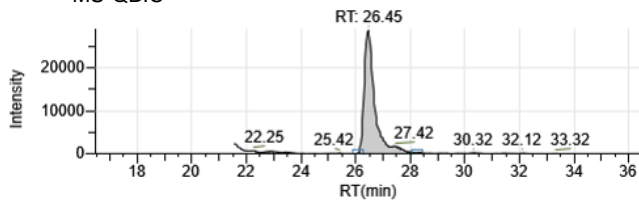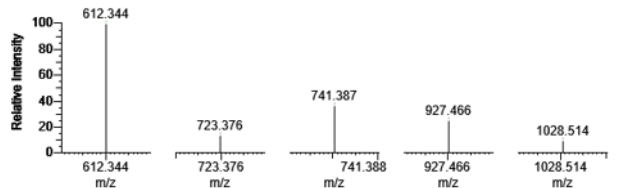



P24  
A071

Sample

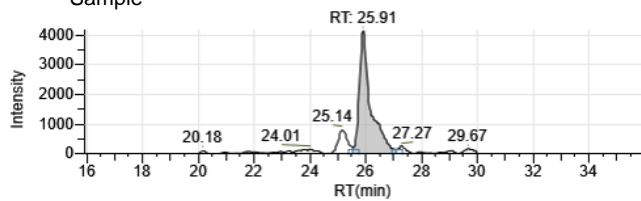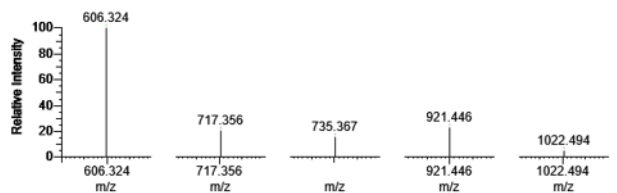

A071 MS-QBIC

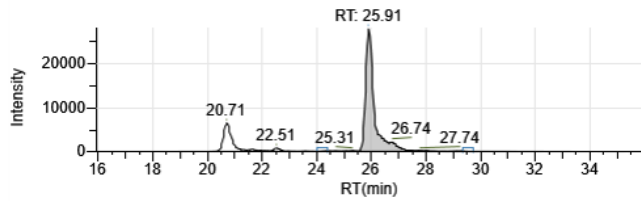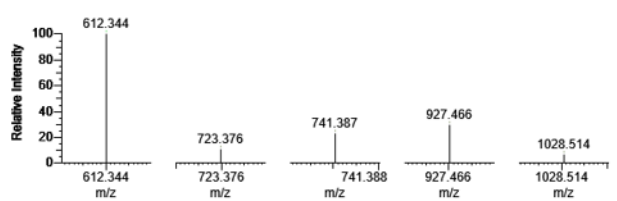

P26  
A043

Sample

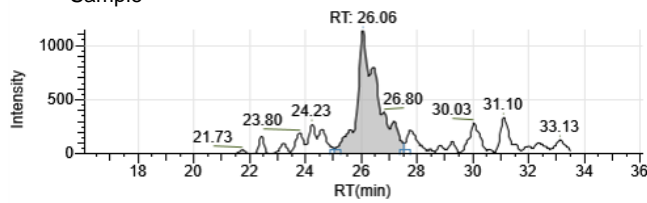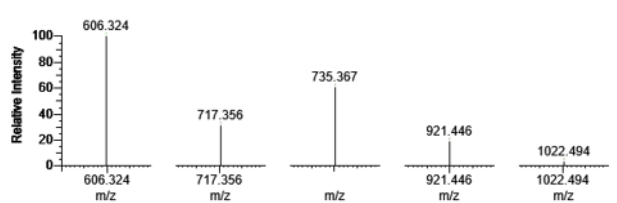

A043 MS-QBIC

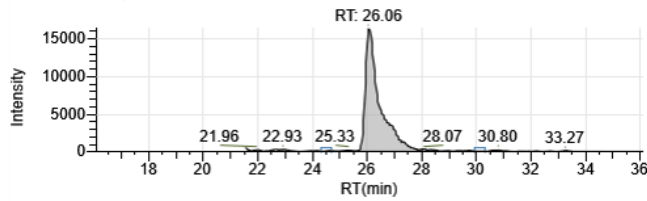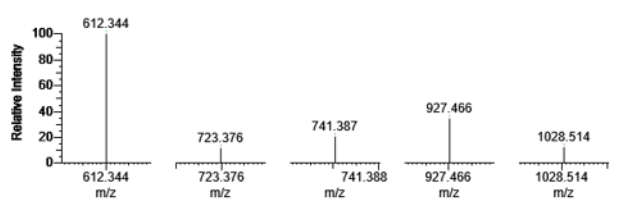

P28  
A067

Sample

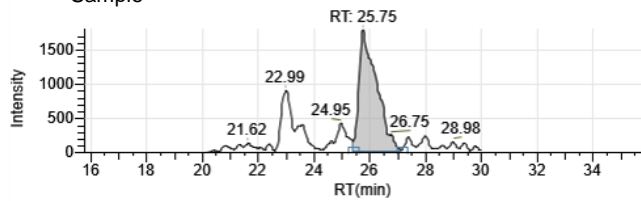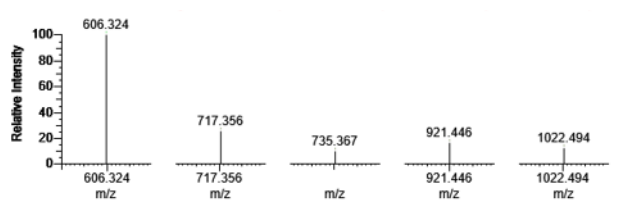

A067 MS-QBIC

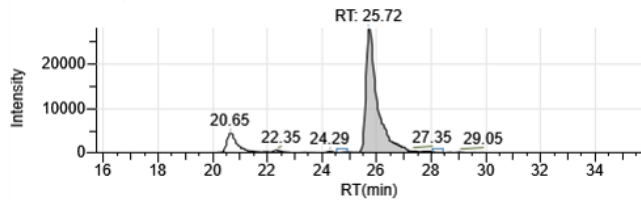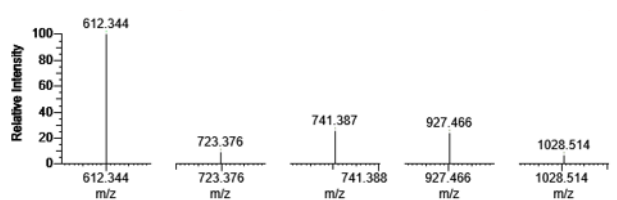

P29  
A056

Sample

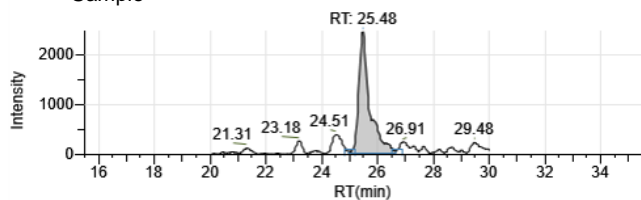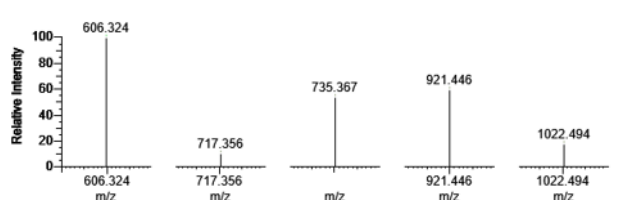

A056 MS-QBIC

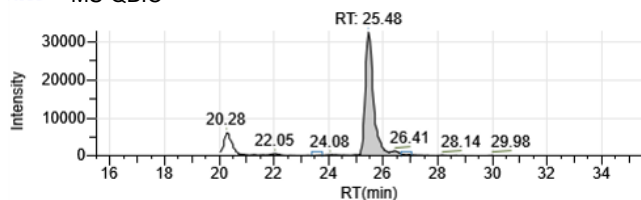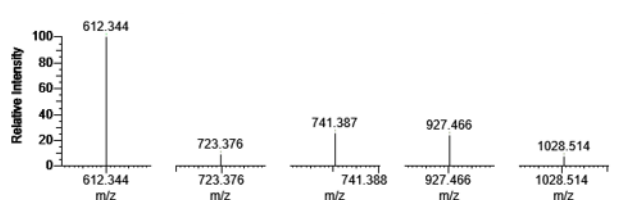



# C IGK (TVAAPSVFIFPPSDEQLK) Heart

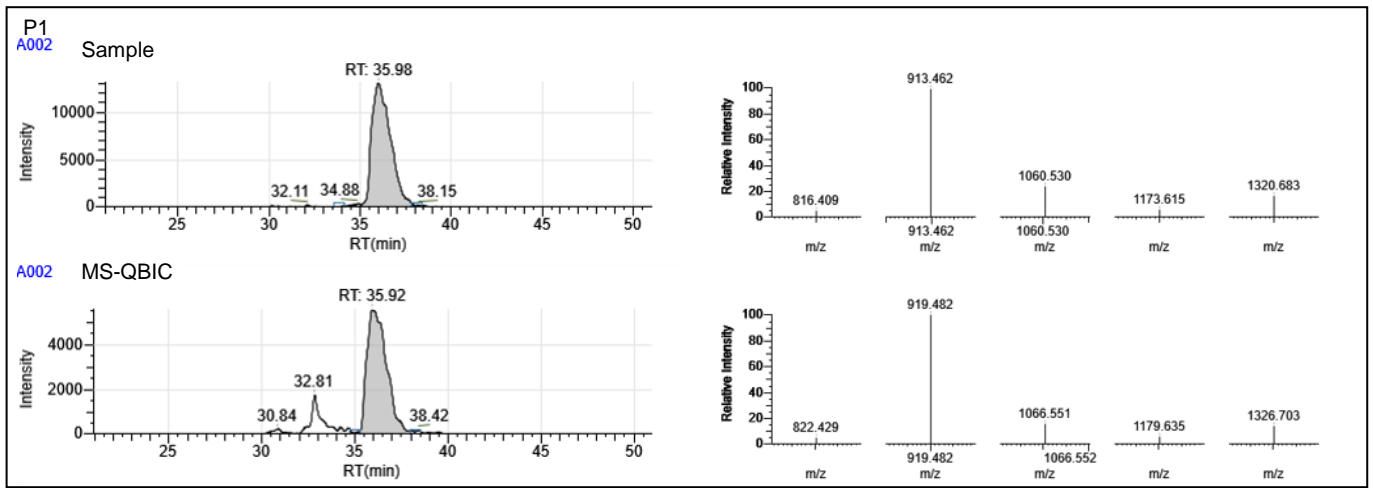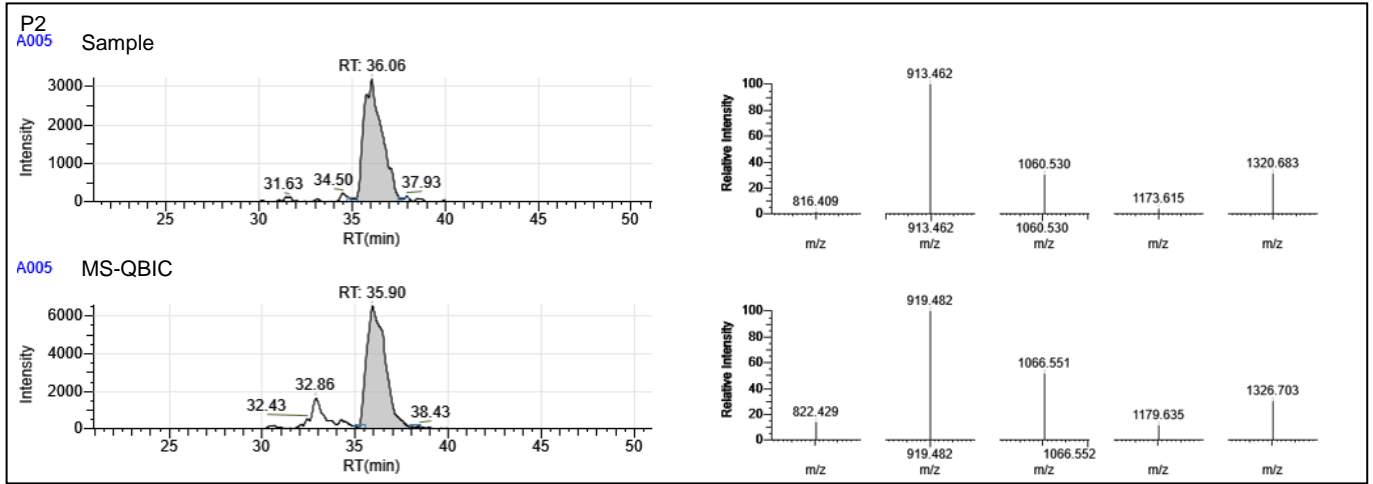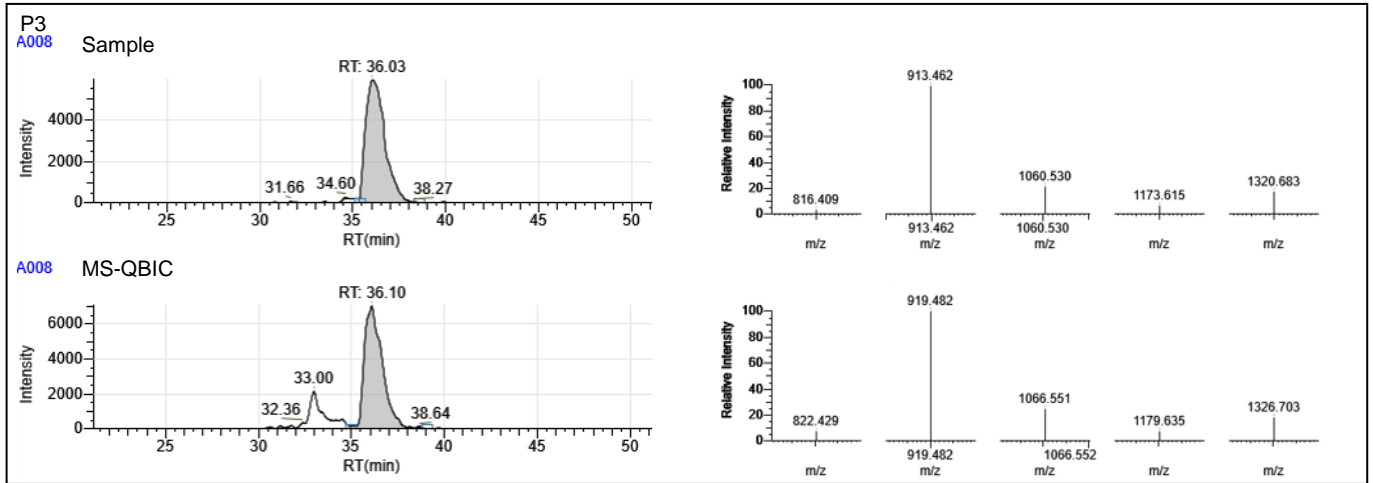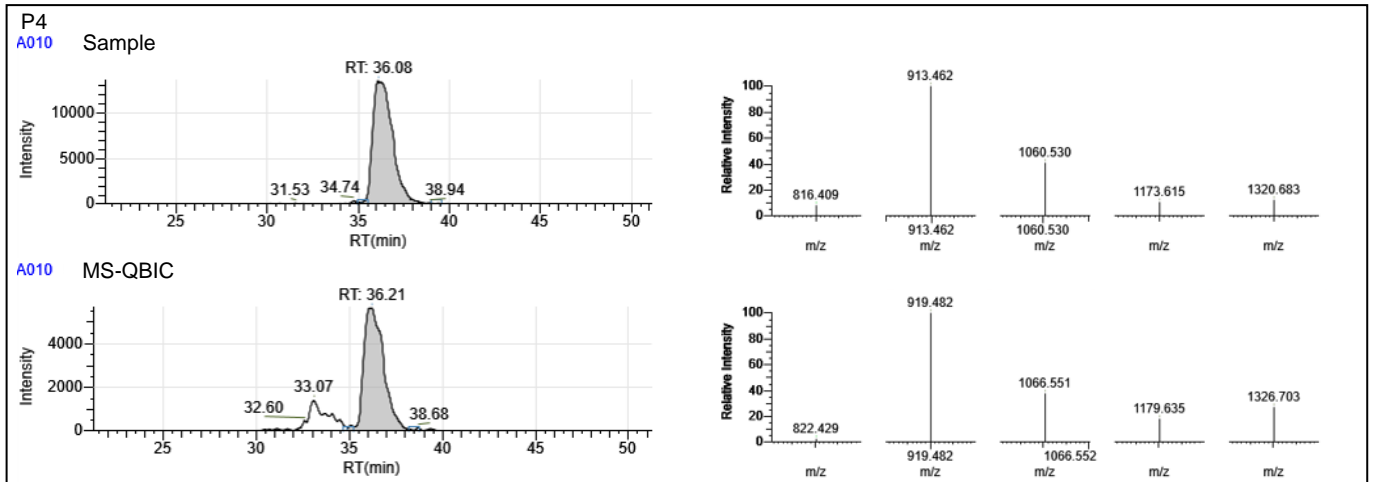

P5  
A013

Sample

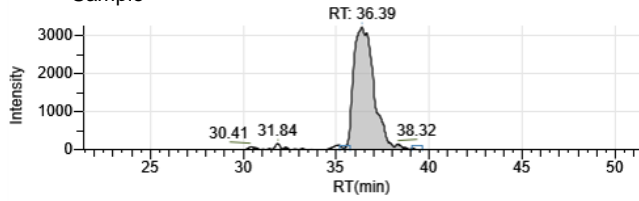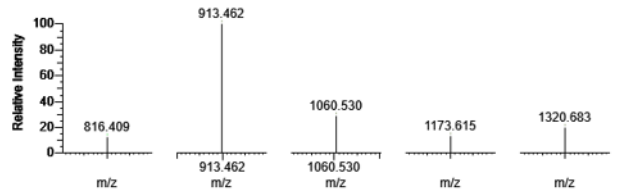

A013 MS-QBIC

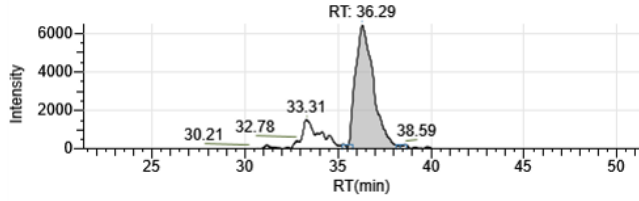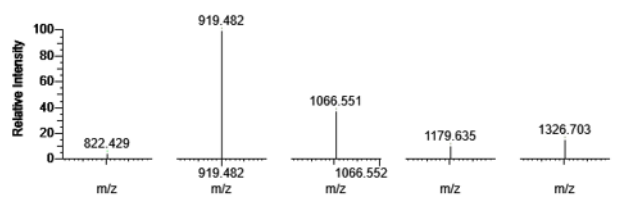

P6  
A017

Sample

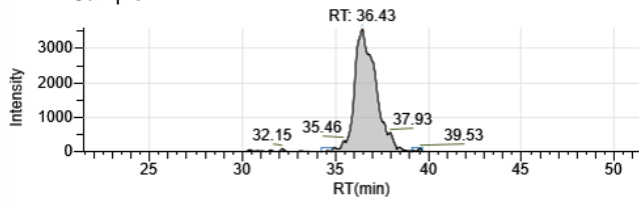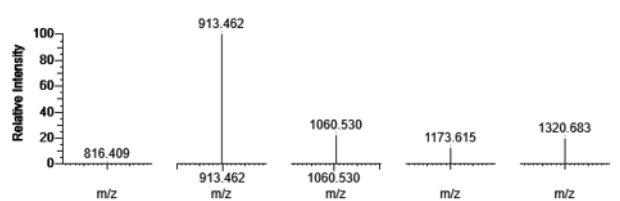

A017 MS-QBIC

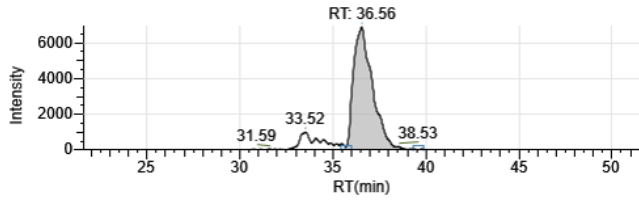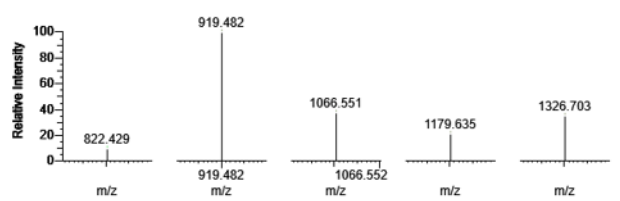

P7  
A076

Sample

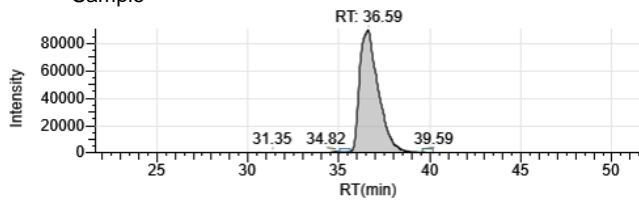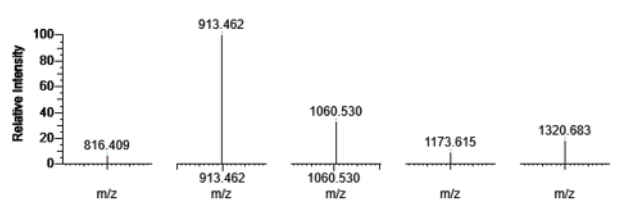

A076 MS-QBIC

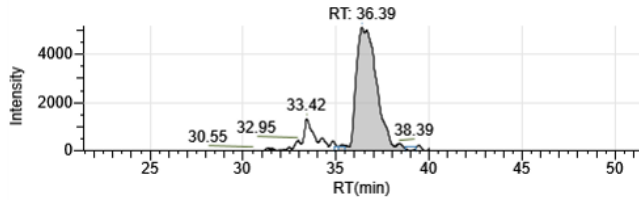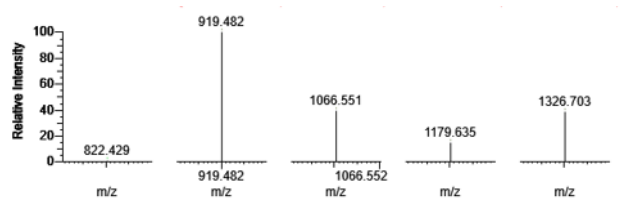

P8  
A020

Sample

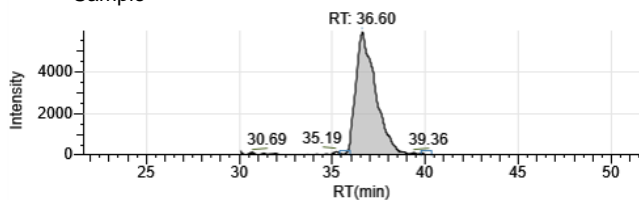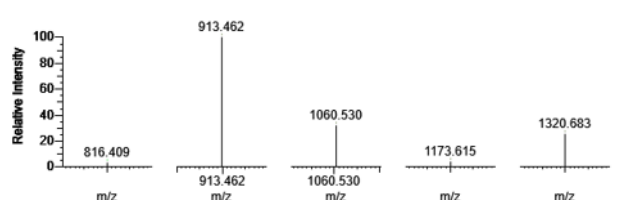

A020 MS-QBIC

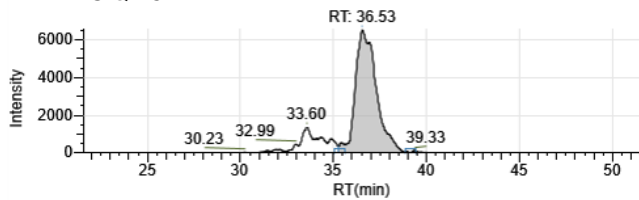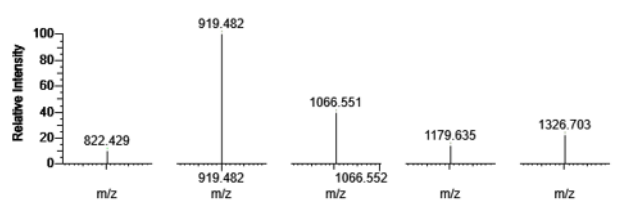

P9  
A023

Sample

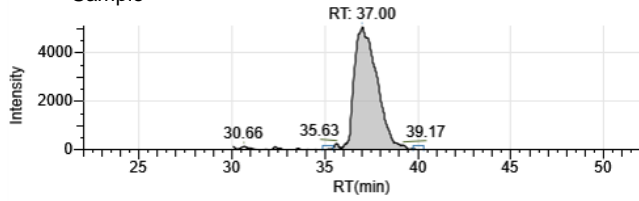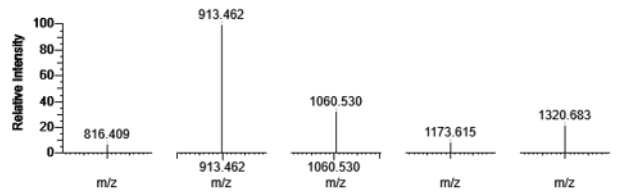

A023 MS-QBIC

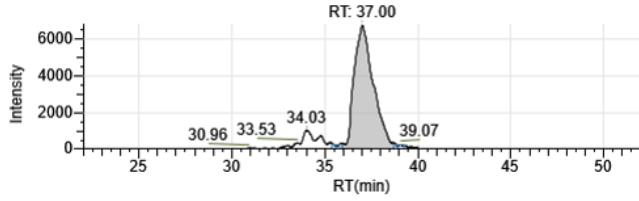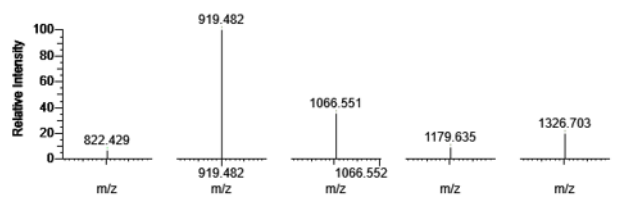

P10  
A026

Sample

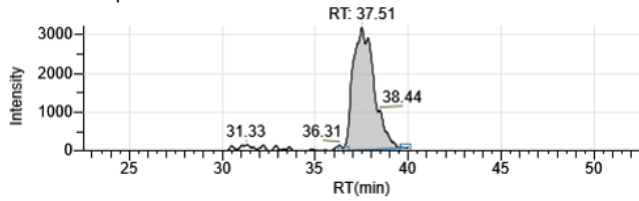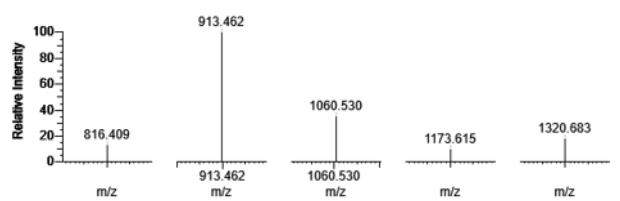

A026 MS-QBIC

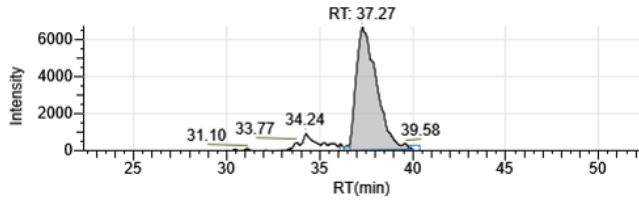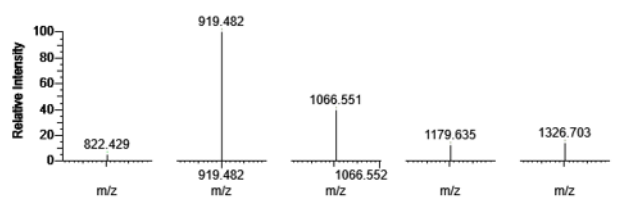

P11  
A029

Sample

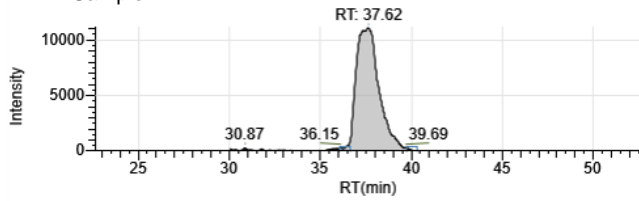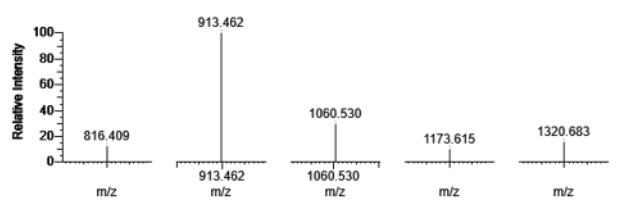

A029 MS-QBIC

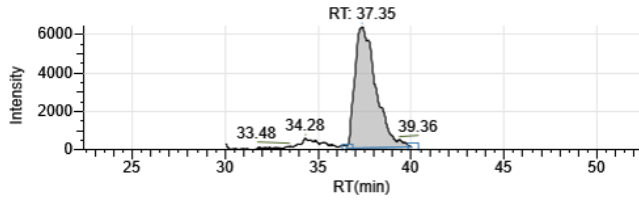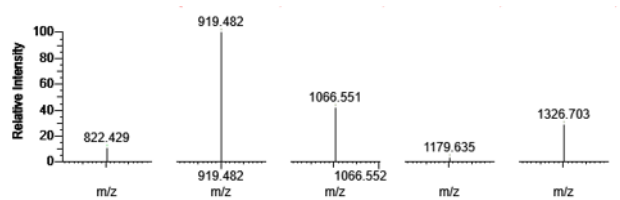

P12  
A032

Sample

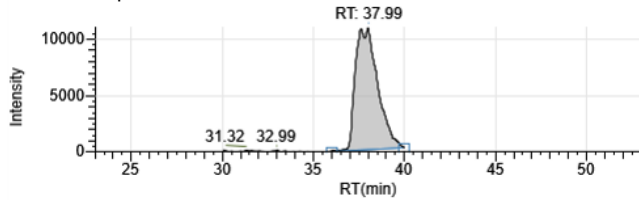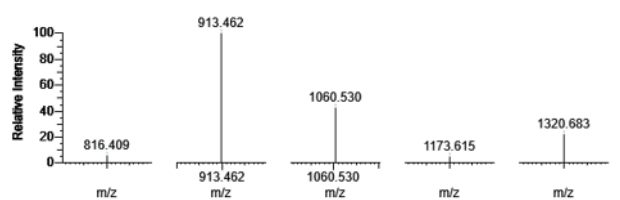

A032 MS-QBIC

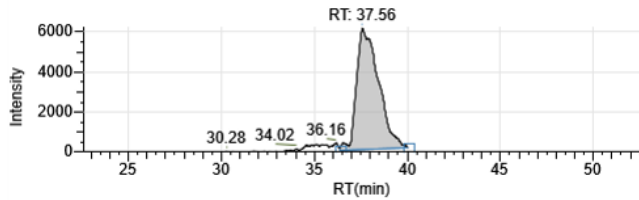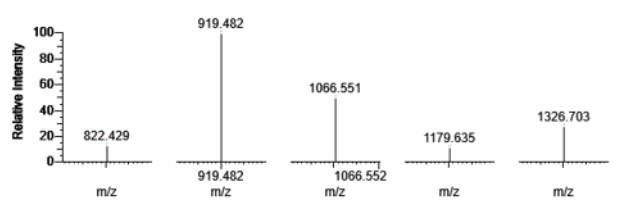

P13  
A034 Sample

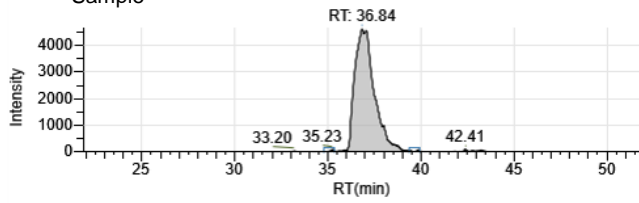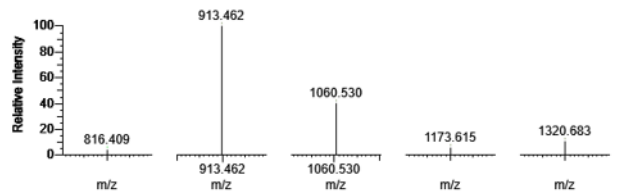

A034 MS-QBIC

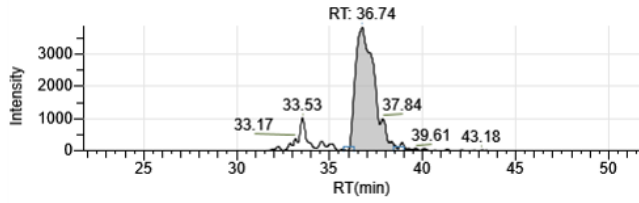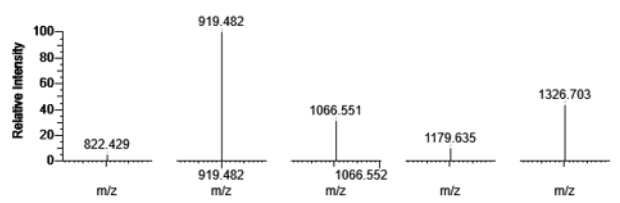

P14  
A038 Sample

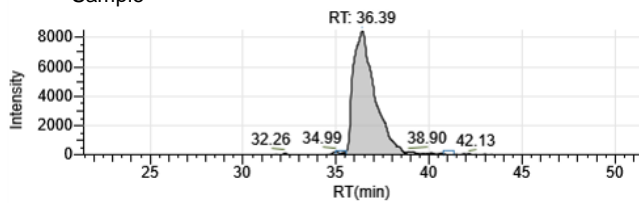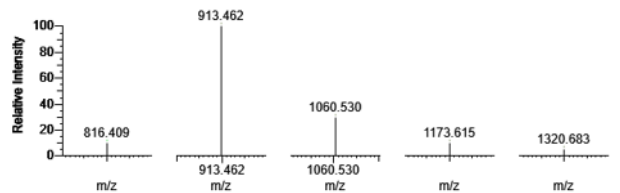

A038 MS-QBIC

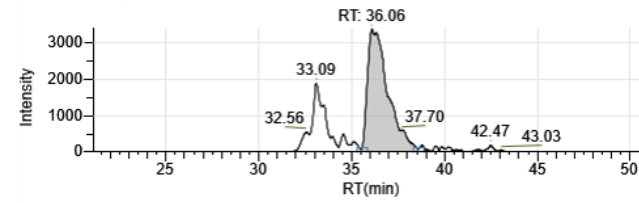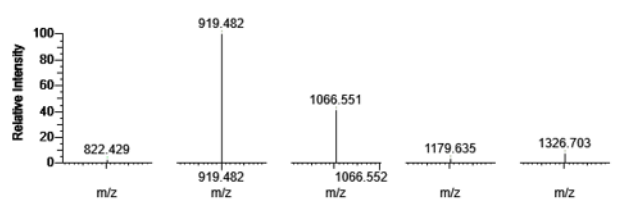

P15  
A087 Sample

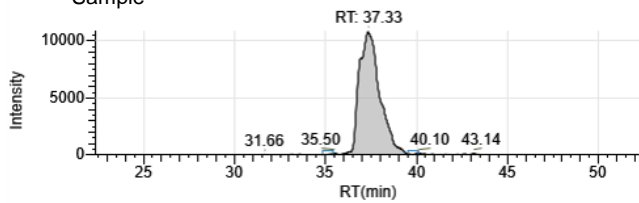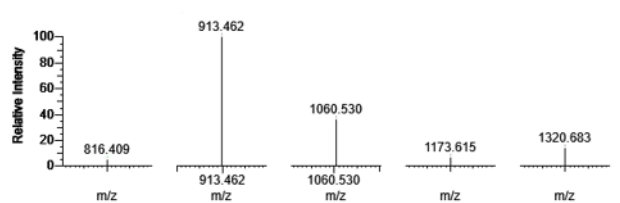

A087 MS-QBIC

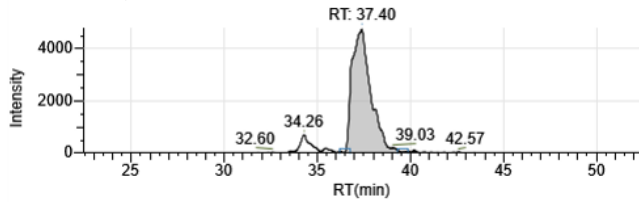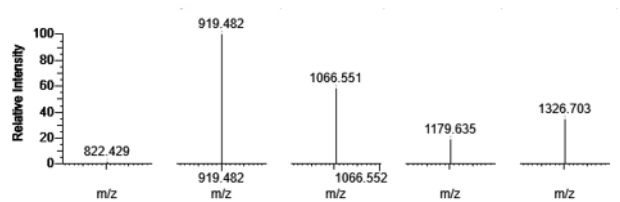

P16  
A089 Sample

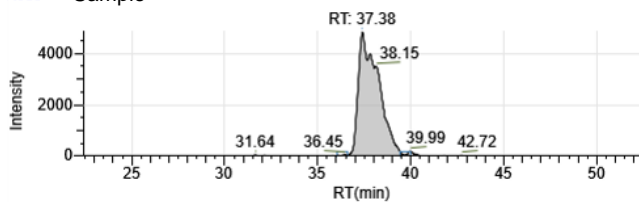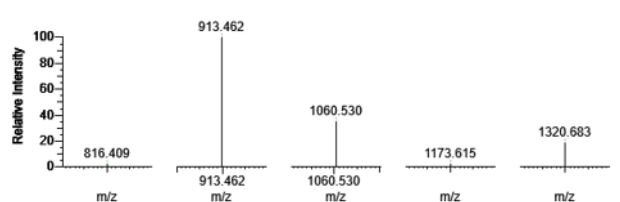

A089 MS-QBIC

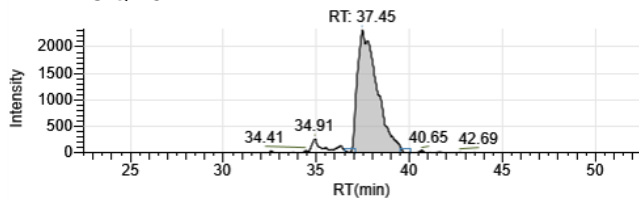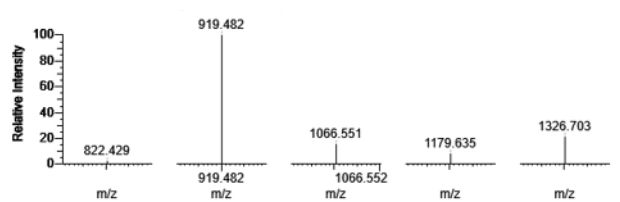

P17  
A046 Sample

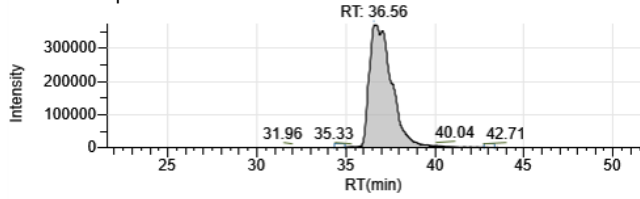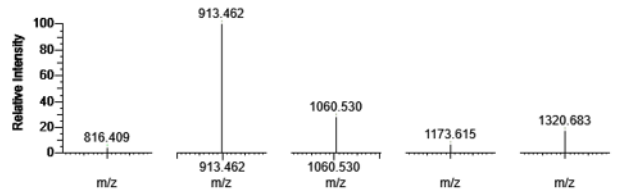

A046 MS-QBIC

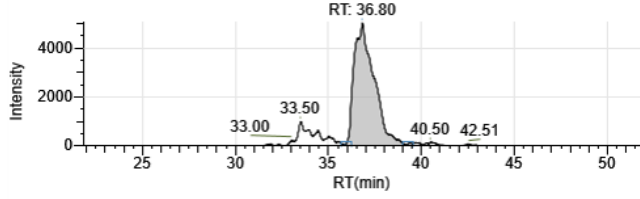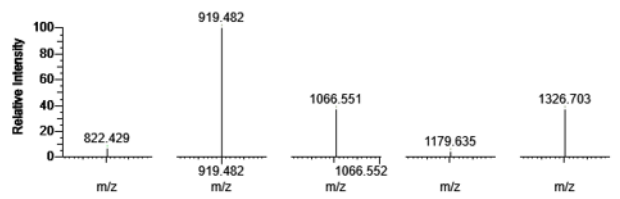

P18  
A050 Sample

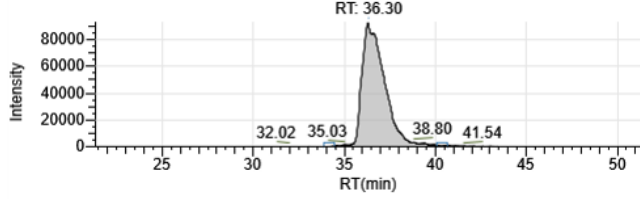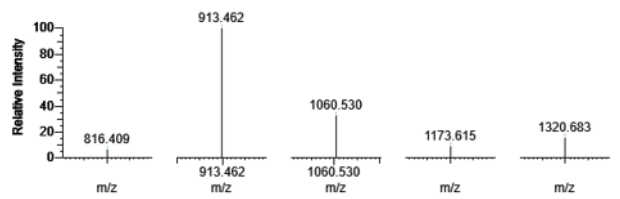

A050 MS-QBIC

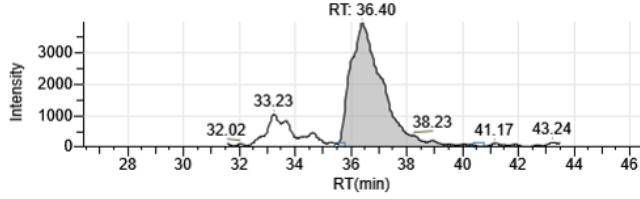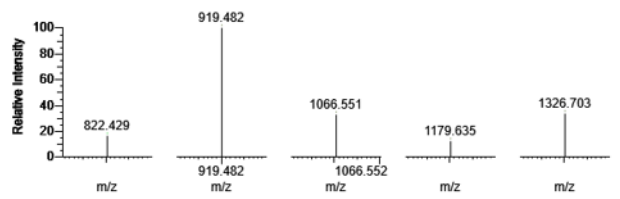

P19  
A053 Sample

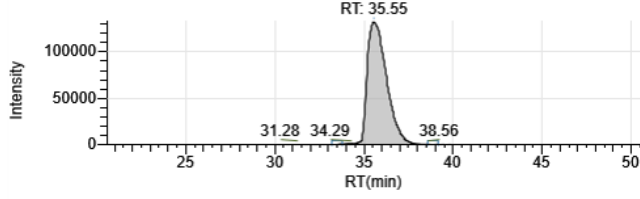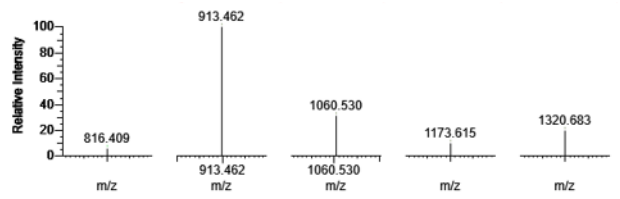

A053 MS-QBIC

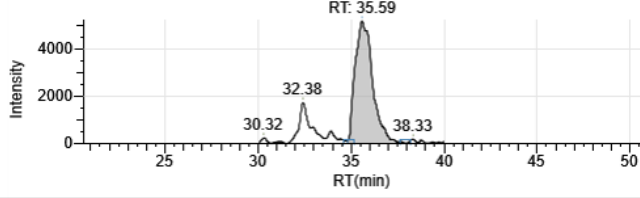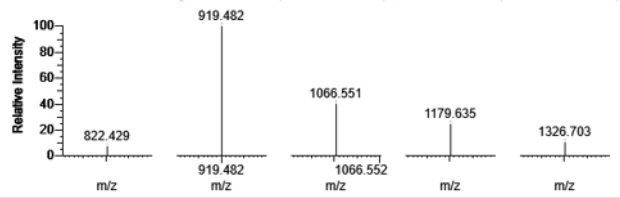

P20  
A063 Sample

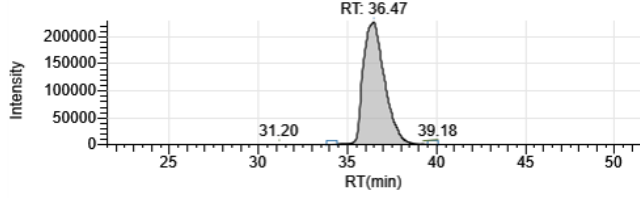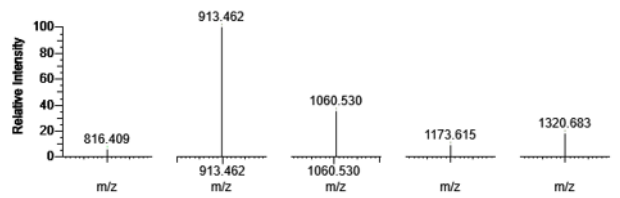

A063 MS-QBIC

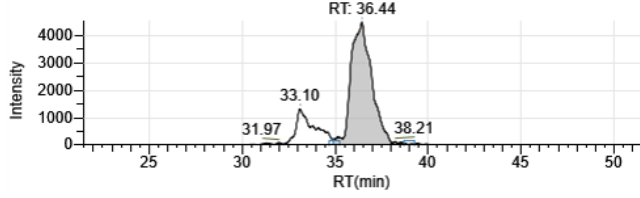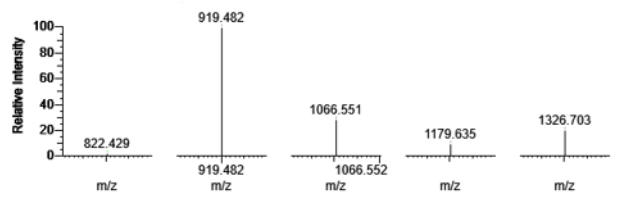

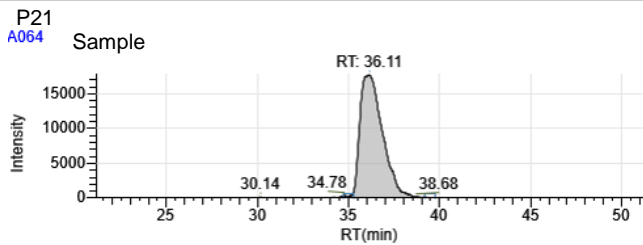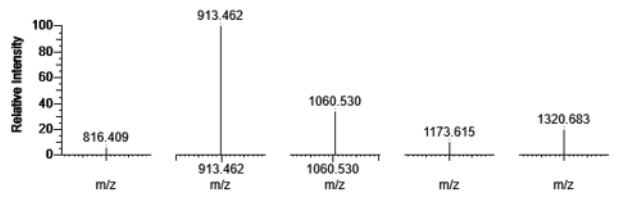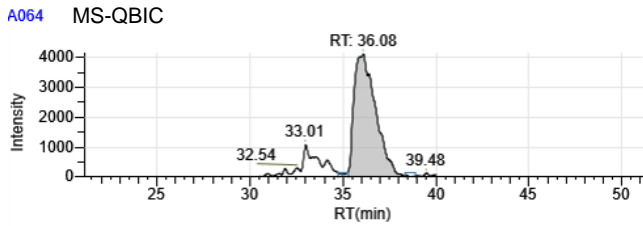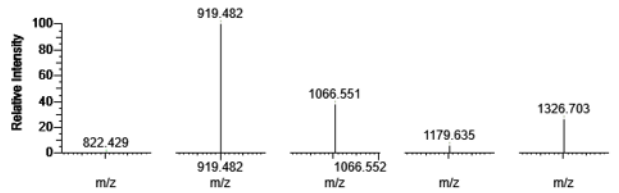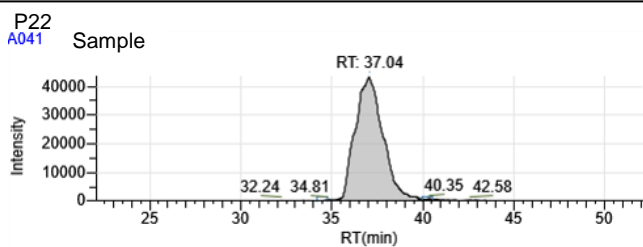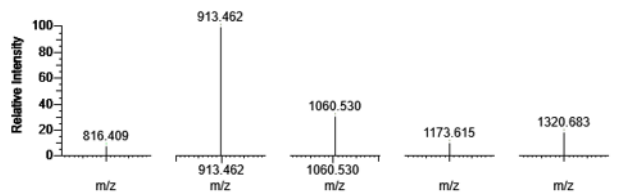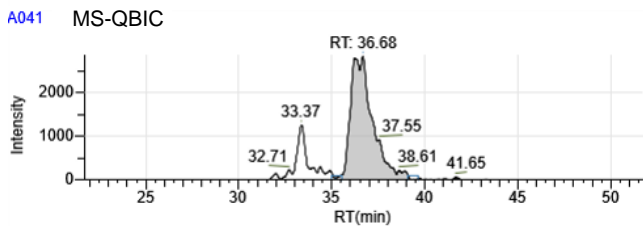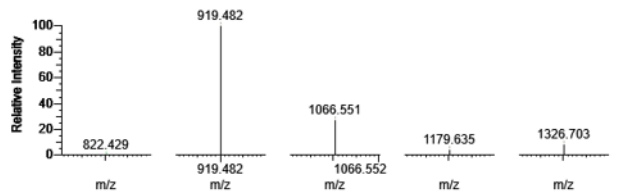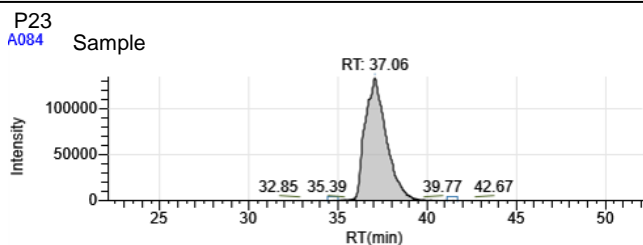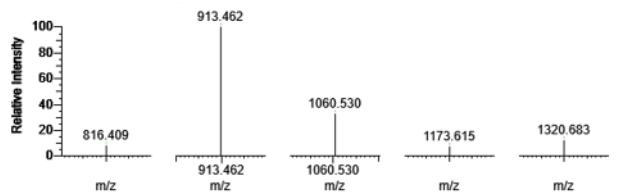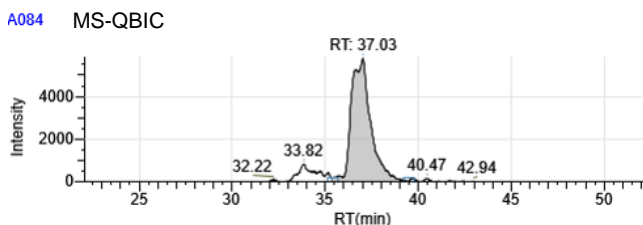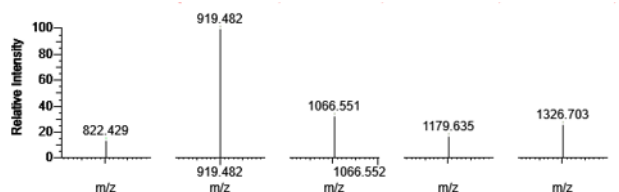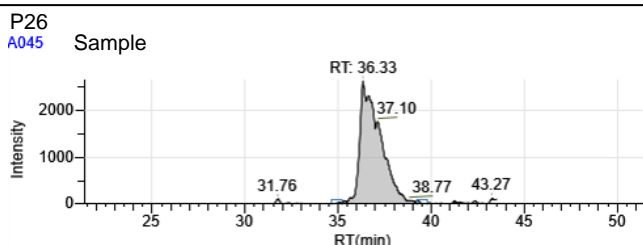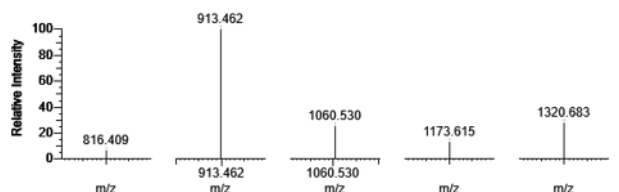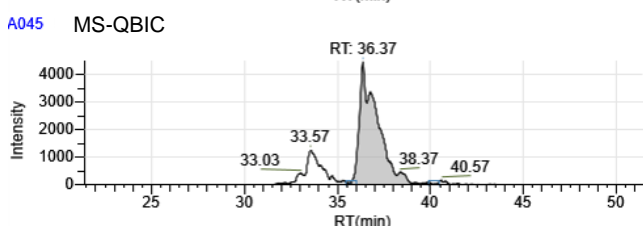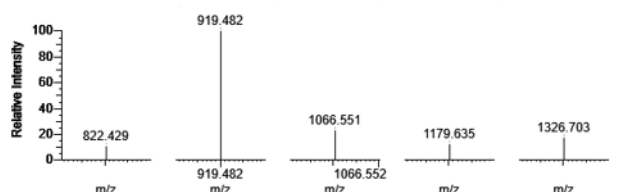

P27  
A059

Sample

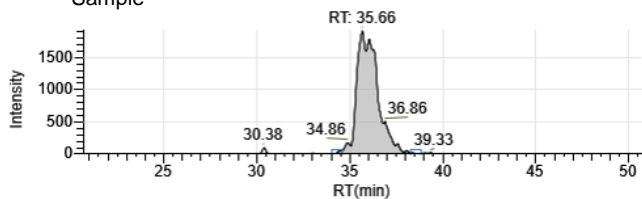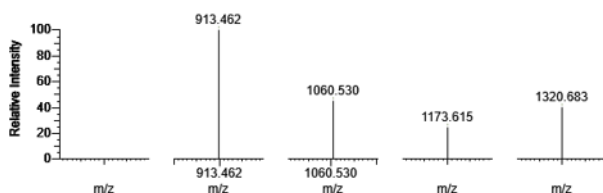

A059 MS-QBIC

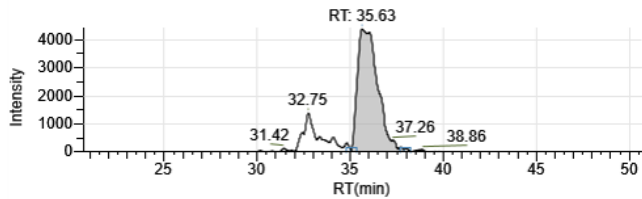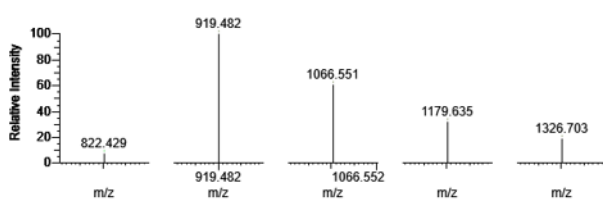

P28

A067

Sample

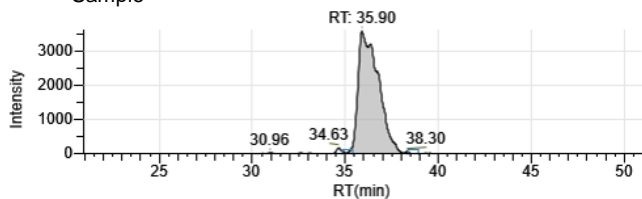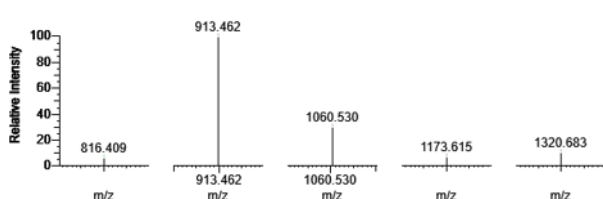

A067 MS-QBIC

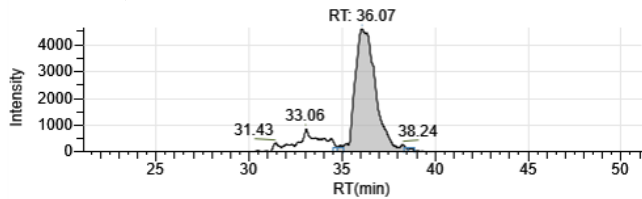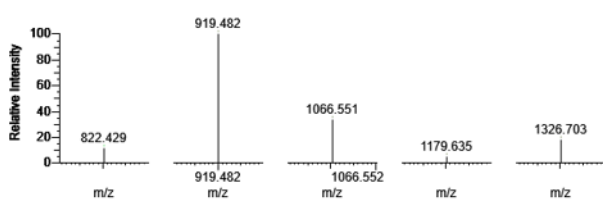

P29

A055

Sample

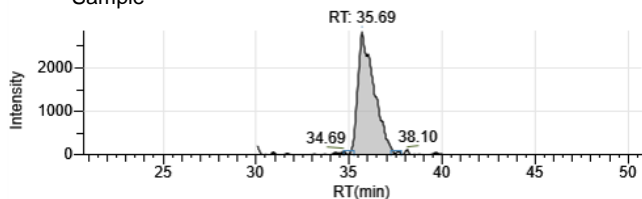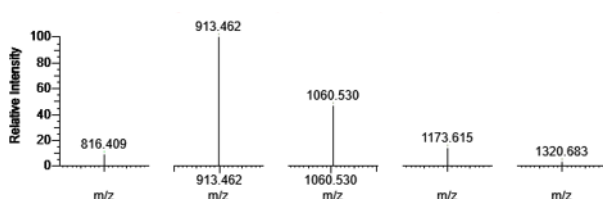

A055 MS-QBIC

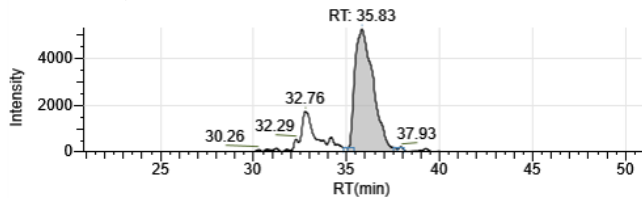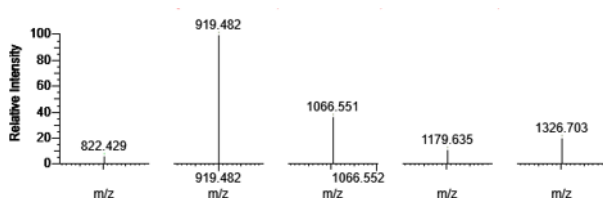

P30

A081

Sample

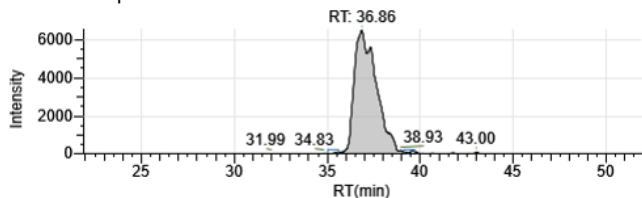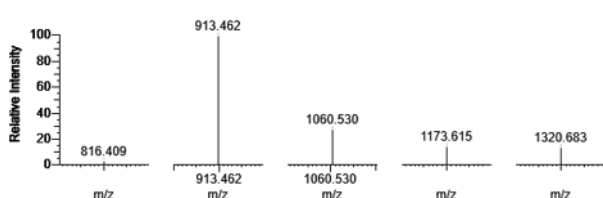

A081 MS-QBIC

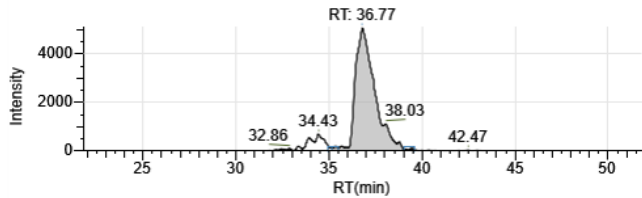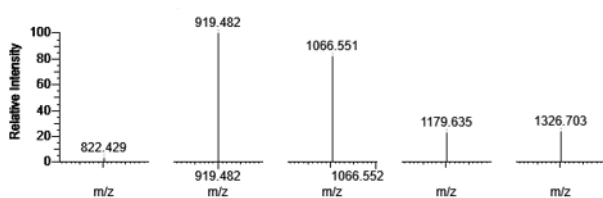



# D IGL (YAASSYLSLTPEQWK) Heart

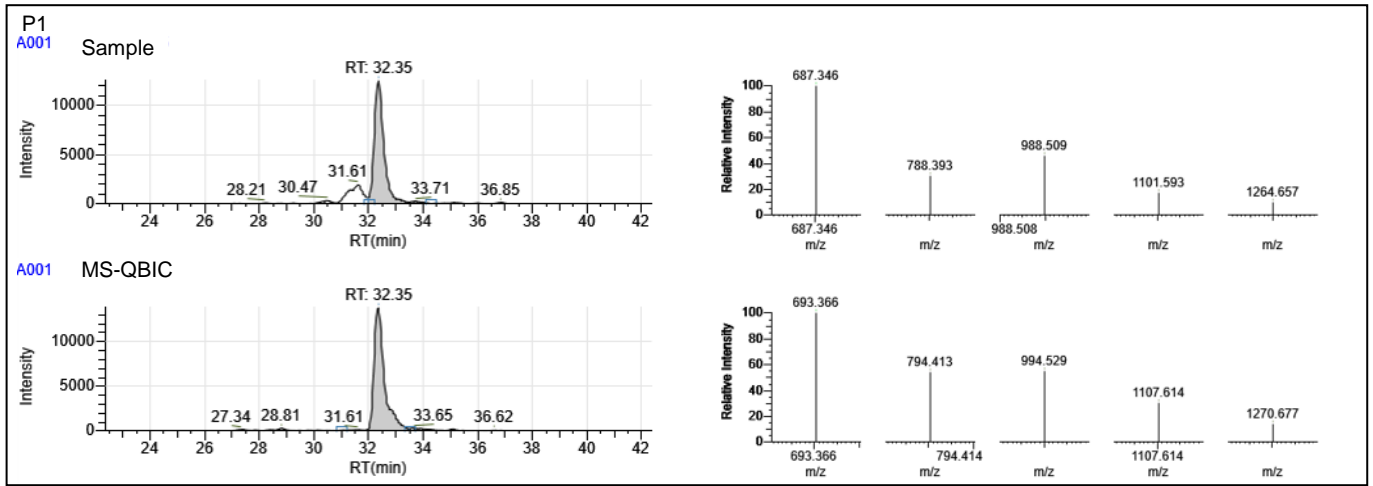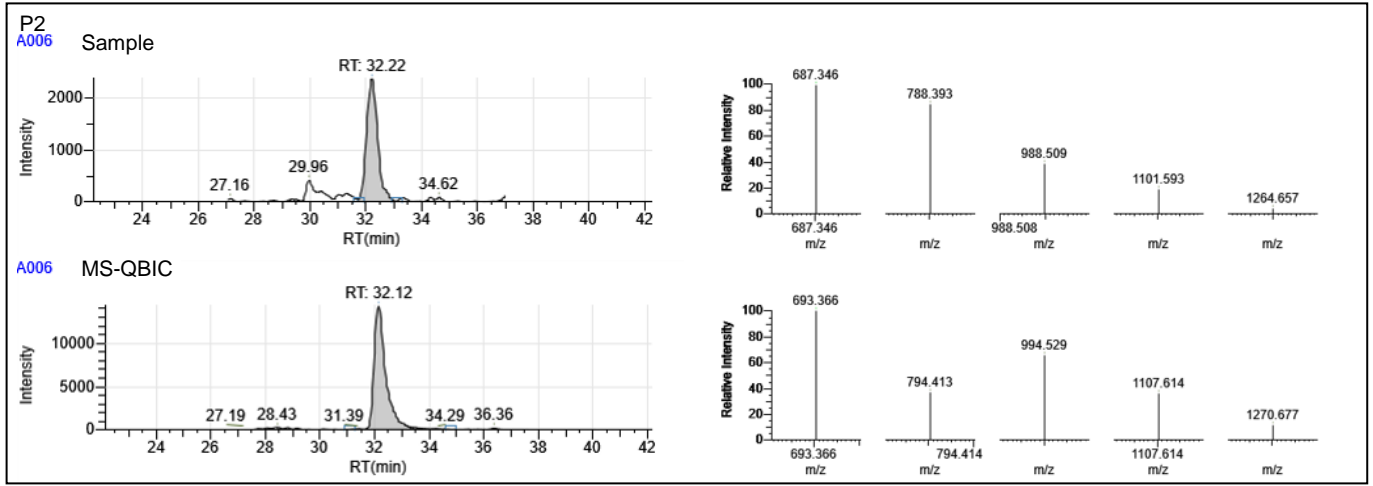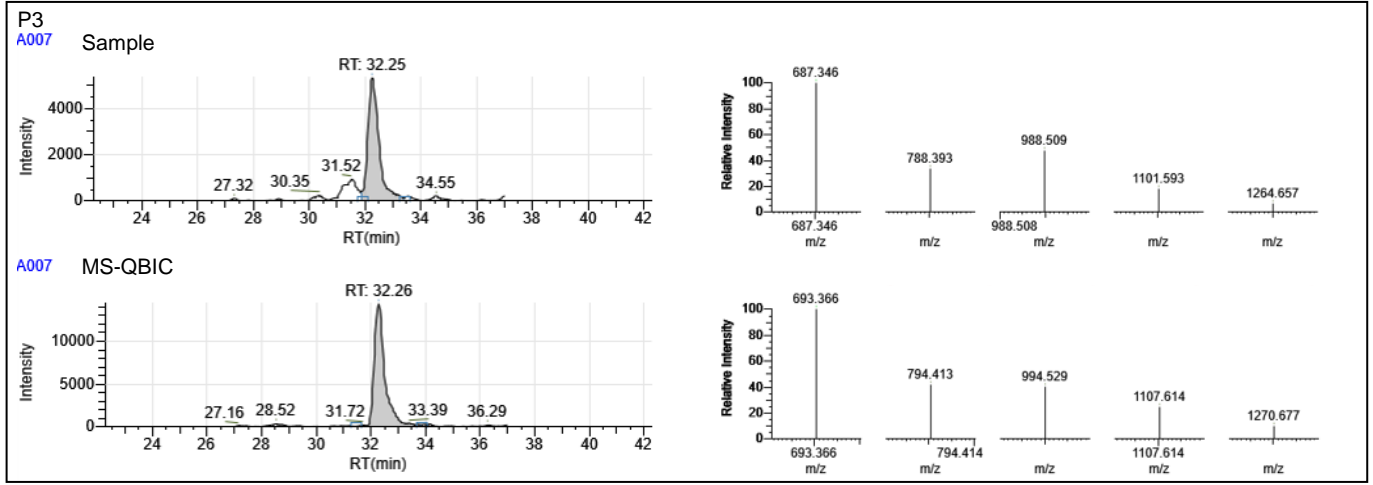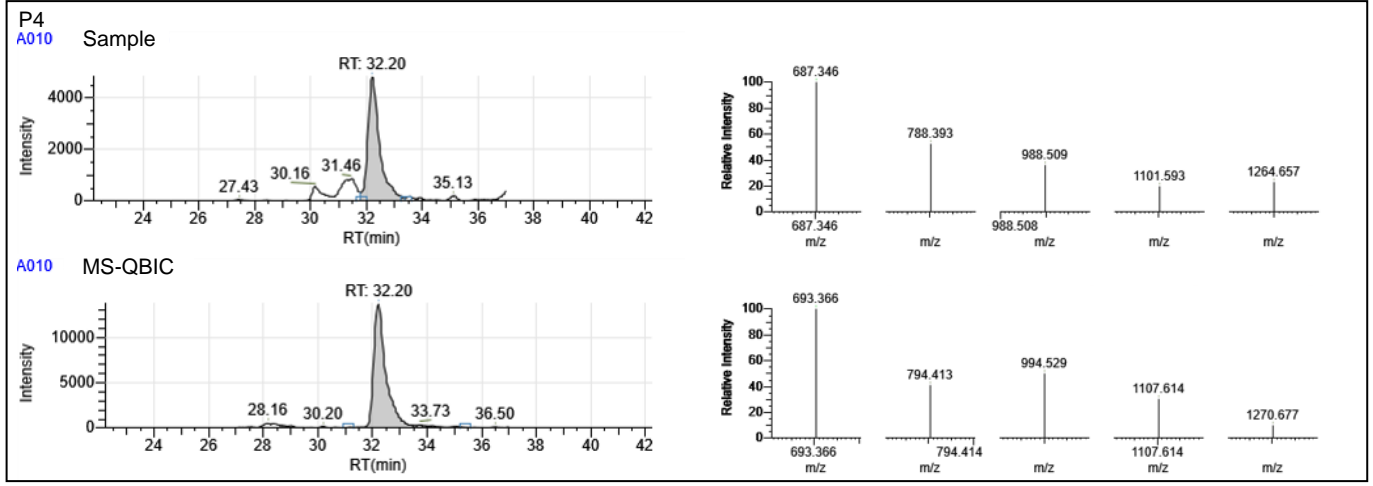



P5  
A013 Sample

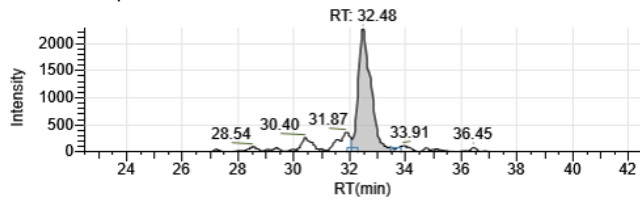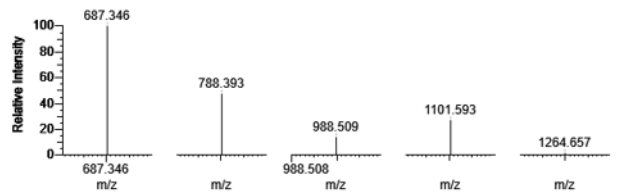

A013 MS-QBIC

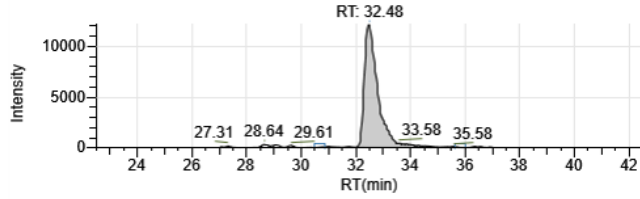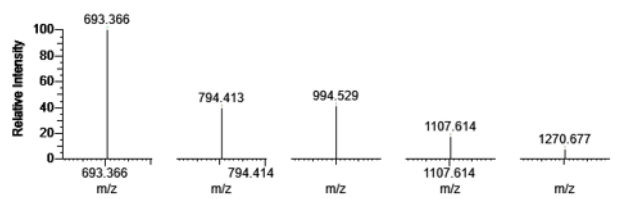

P6  
A017 Sample

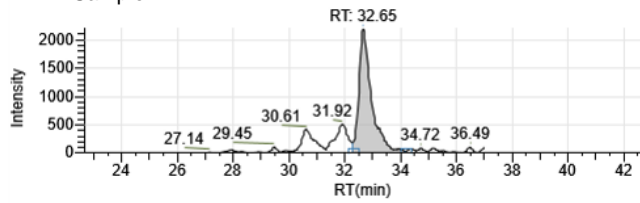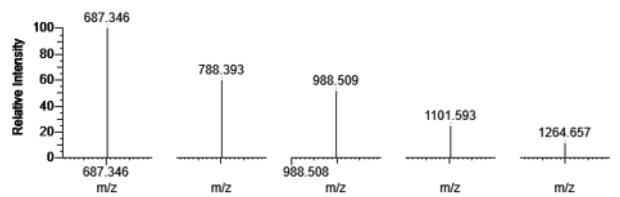

A017 MS-QBIC

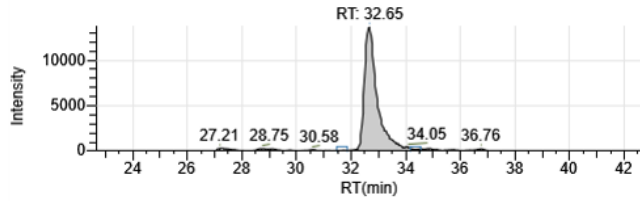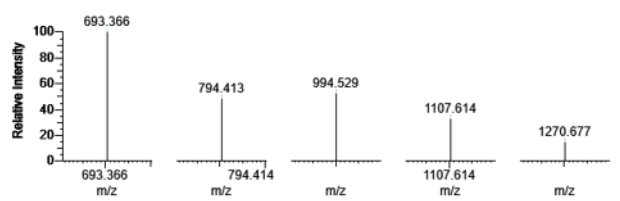

P7  
A077 Sample

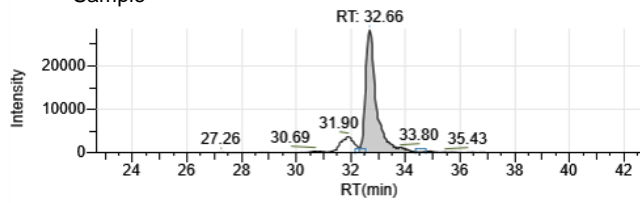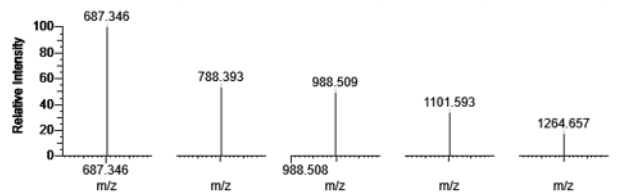

A077 MS-QBIC

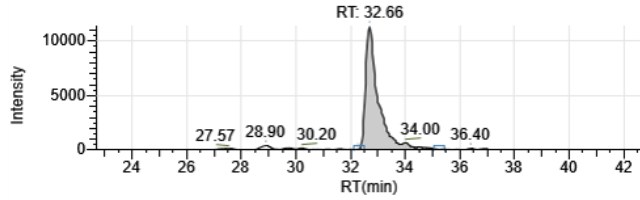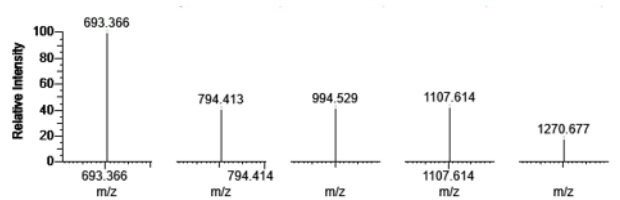

P8  
A019 Sample

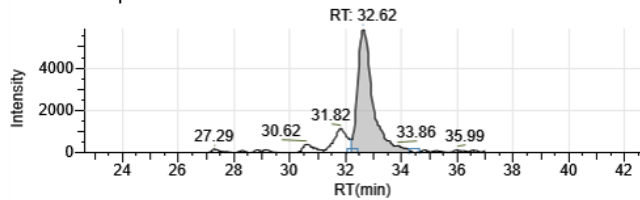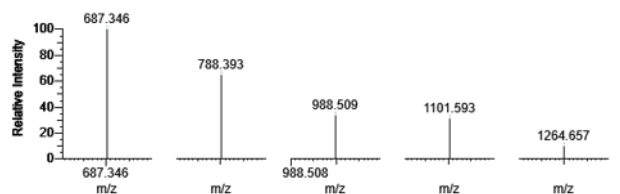

A019 MS-QBIC

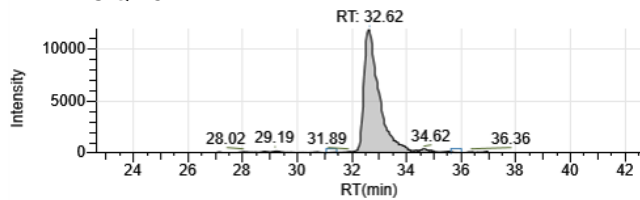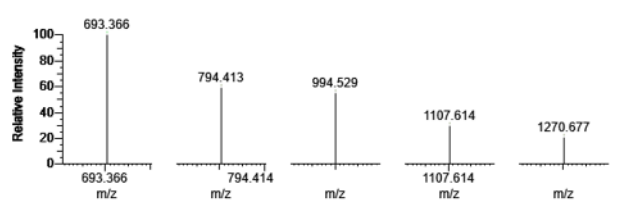

P9  
A022

Sample

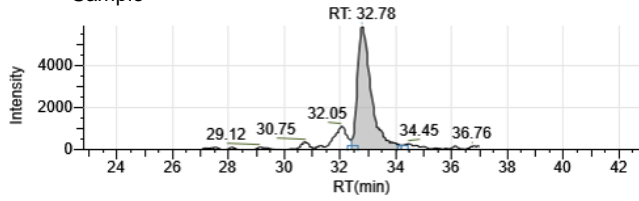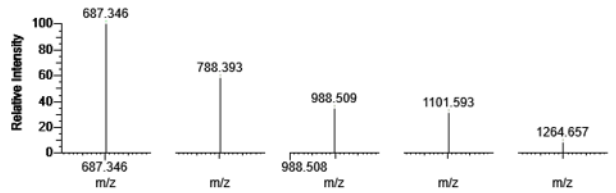

A022 MS-QBIC

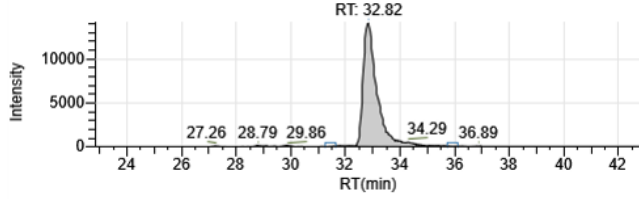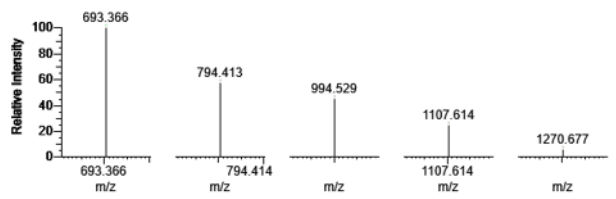

P11  
A029

Sample

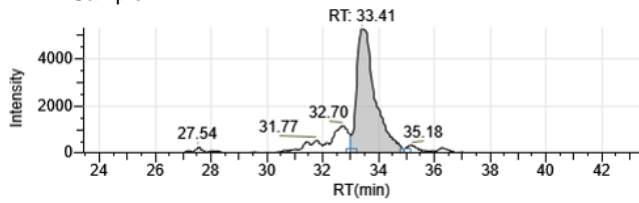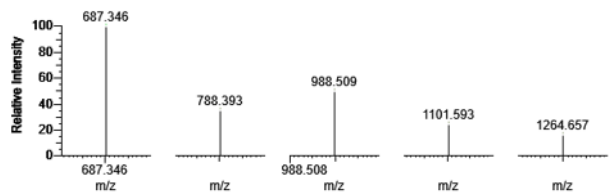

A029 MS-QBIC

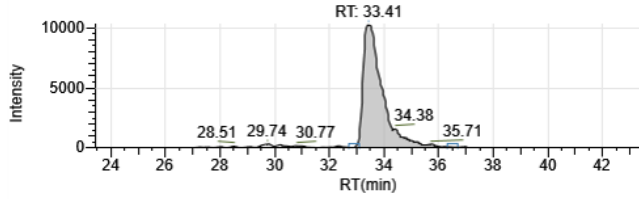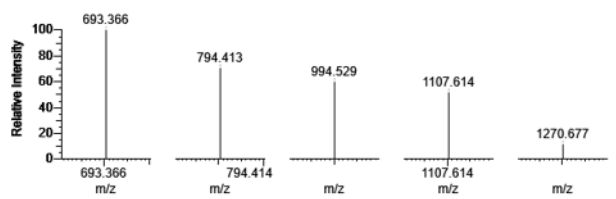

P12  
A032

Sample

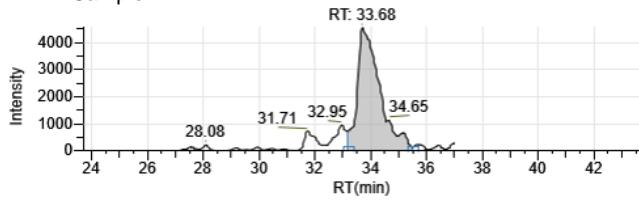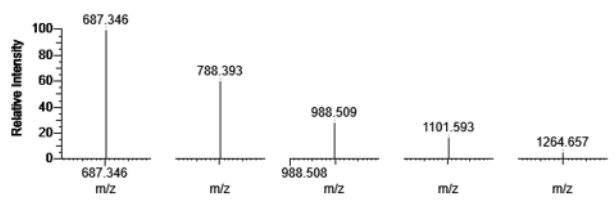

A032 MS-QBIC

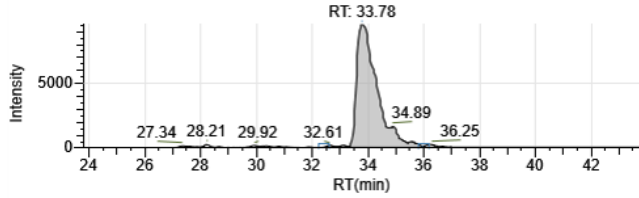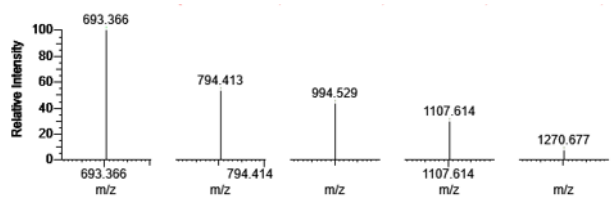

P13  
A034

Sample

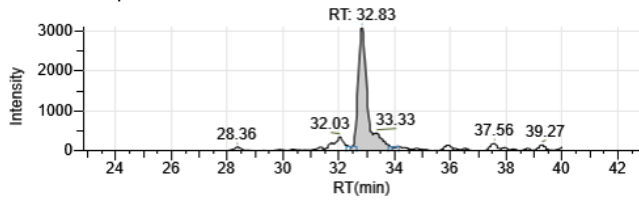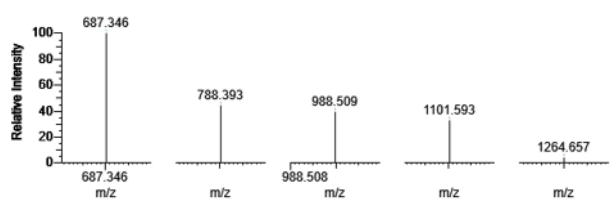

A034 MS-QBIC

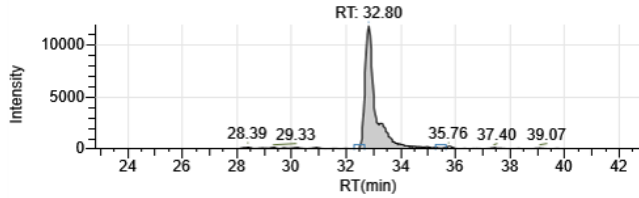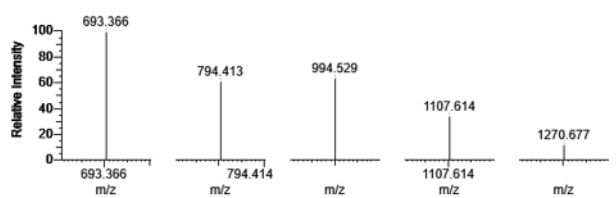

P14  
A038 Sample

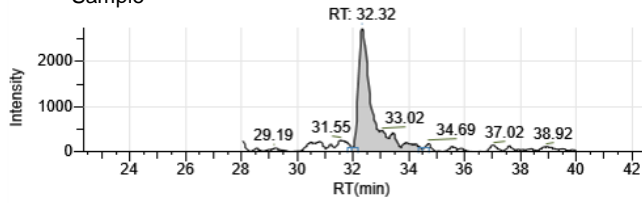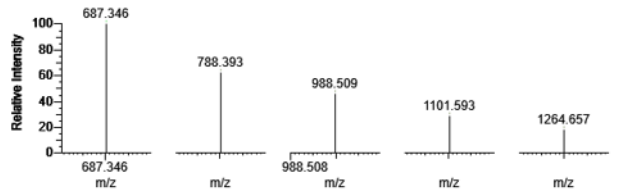

A038 MS-QBIC

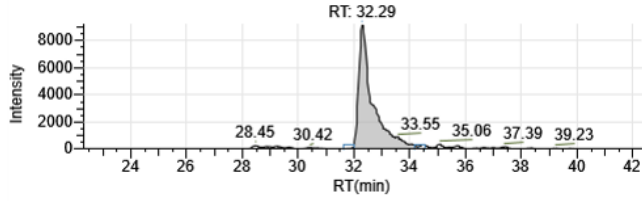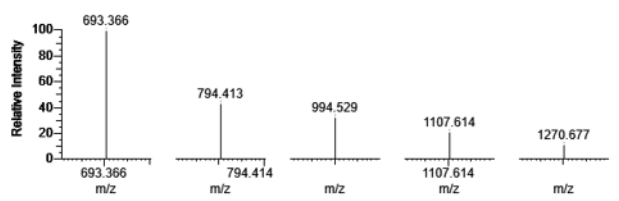

P15  
A087 Sample

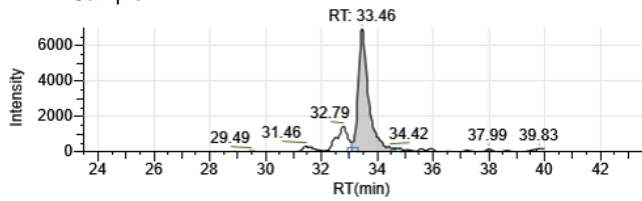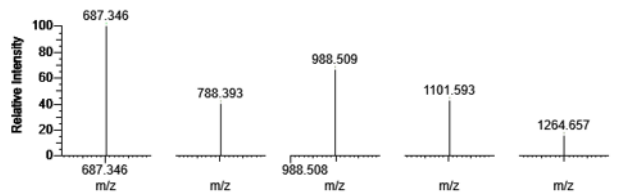

A087 MS-QBIC

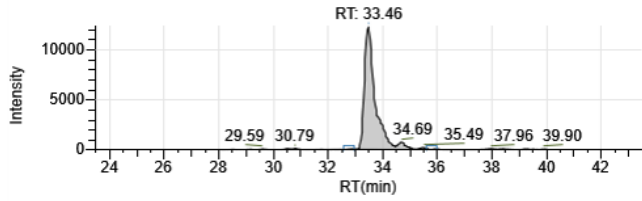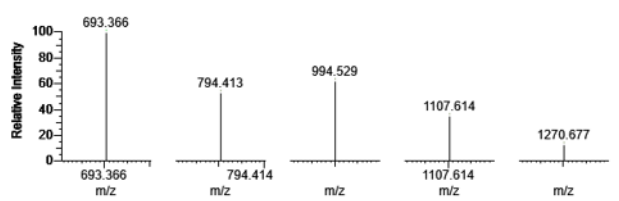

P16  
A090 Sample

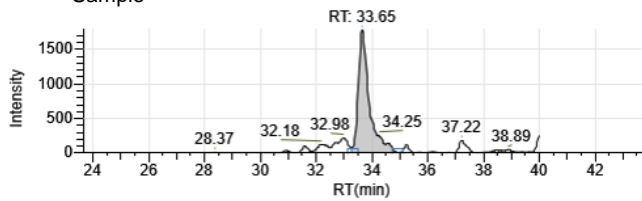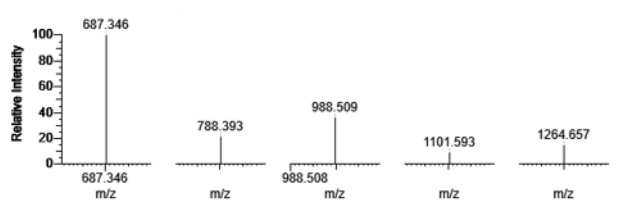

A090 MS-QBIC

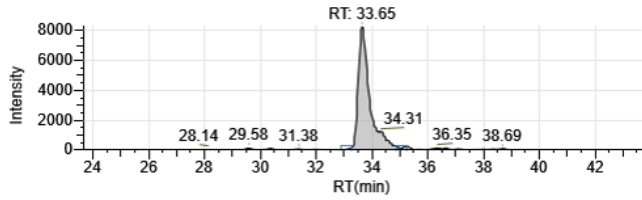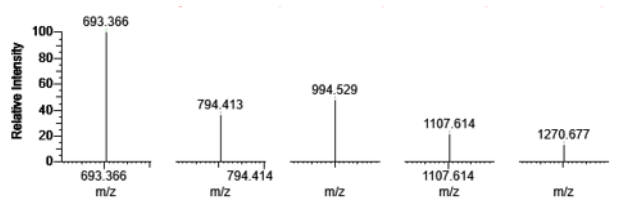

P17  
A046 Sample

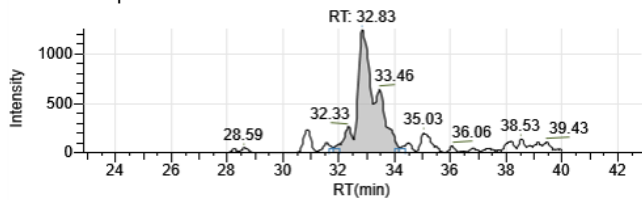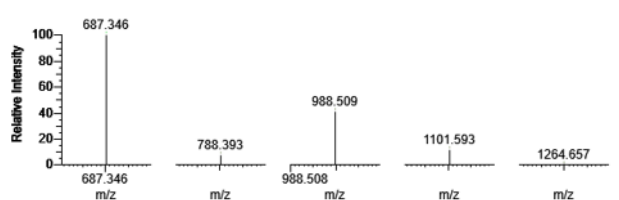

A046 MS-QBIC

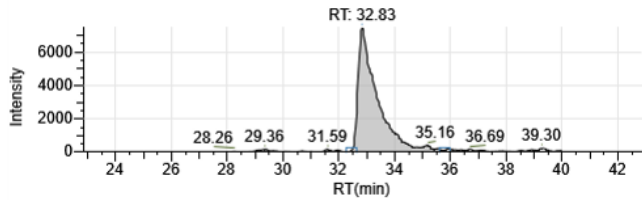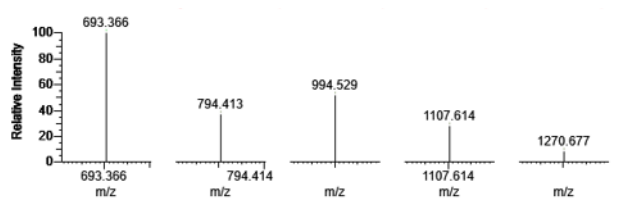

P18  
A050 Sample

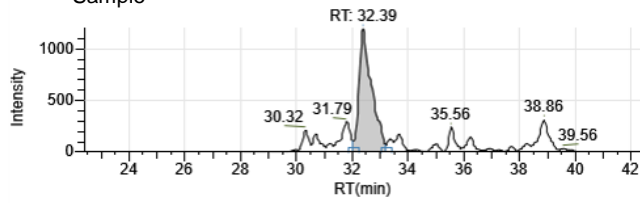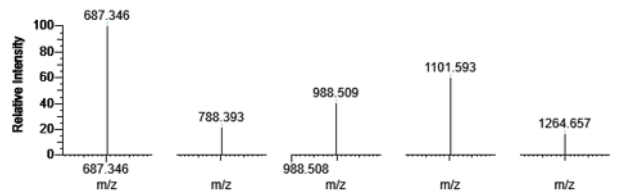

A050 MS-QBIC

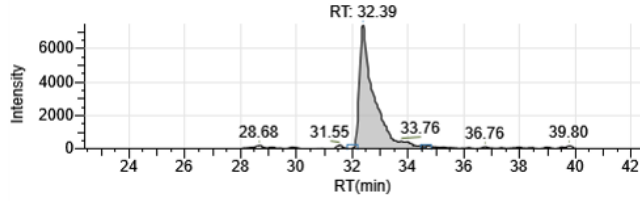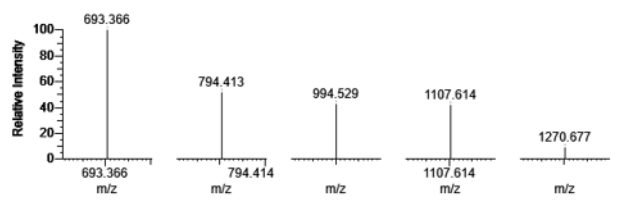

P19  
A053 Sample

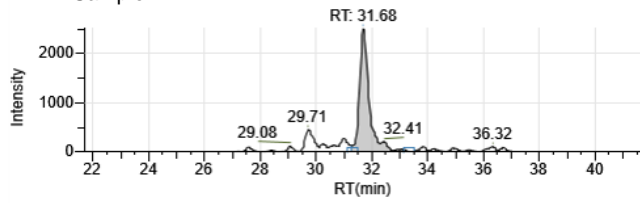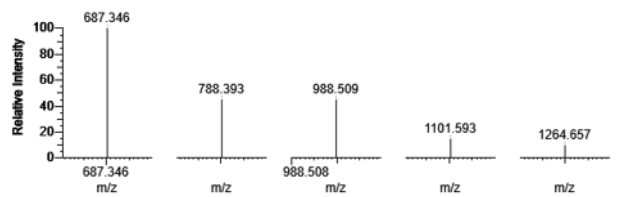

A053 MS-QBIC

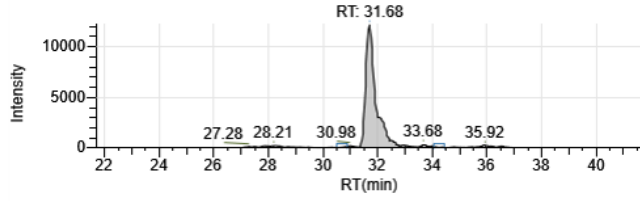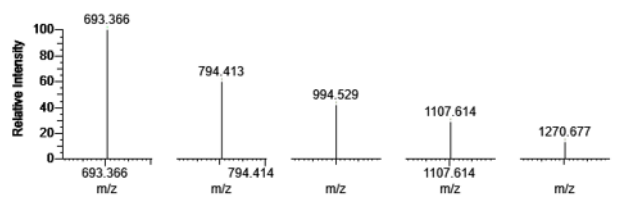

P20  
A061 Sample

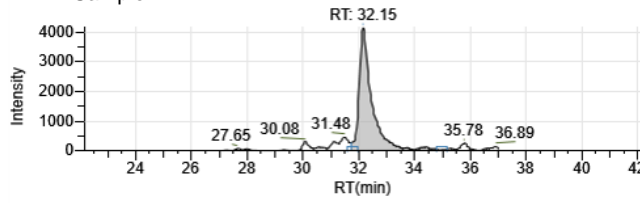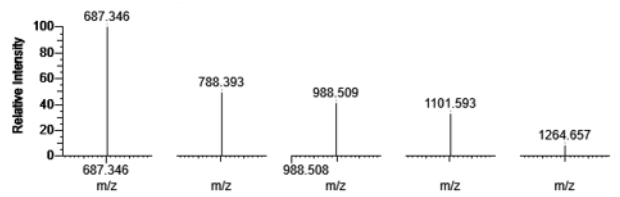

A061 MS-QBIC

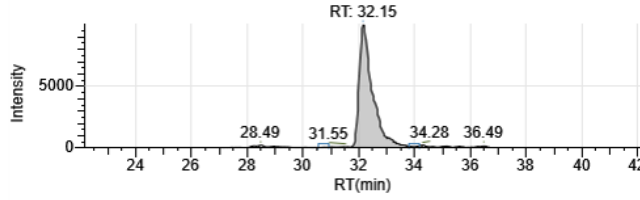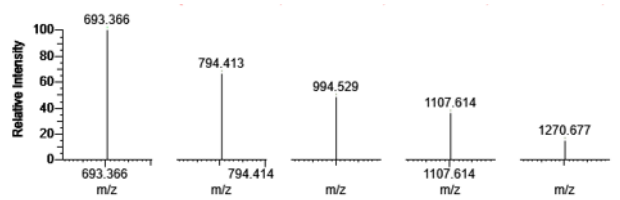

P22  
A041 Sample

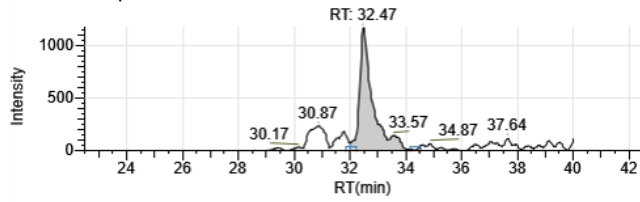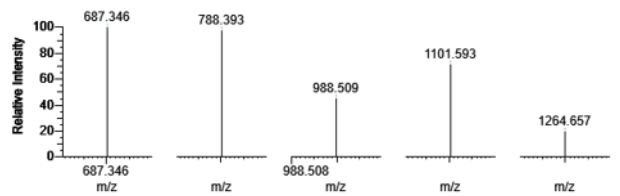

A041 MS-QBIC

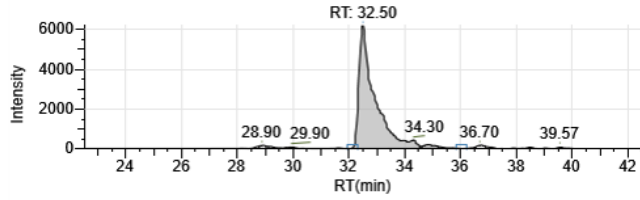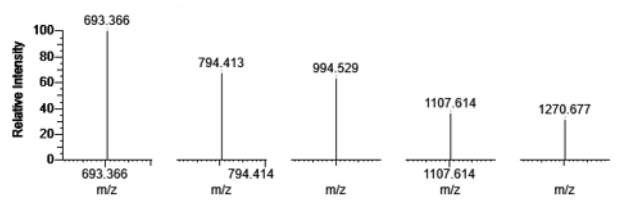

P23

A082

Sample

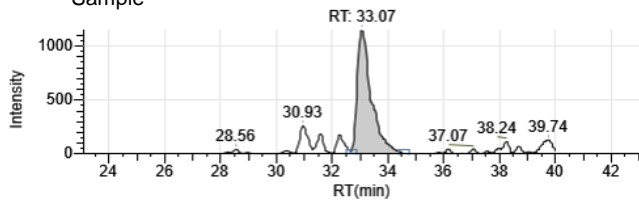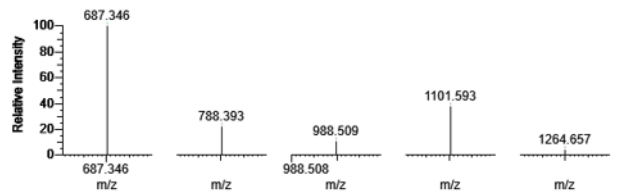

A082

MS-QBIC

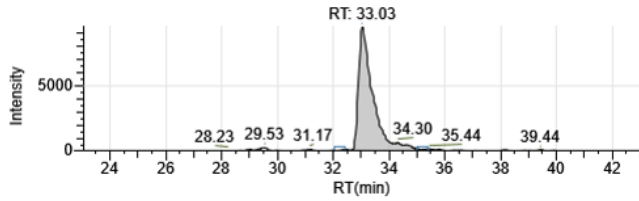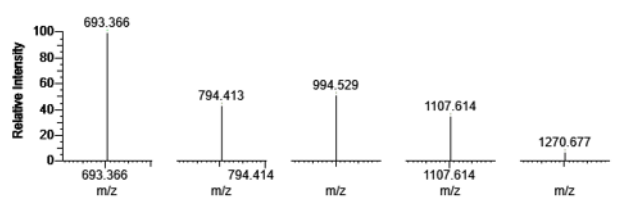

P24

A072

Sample

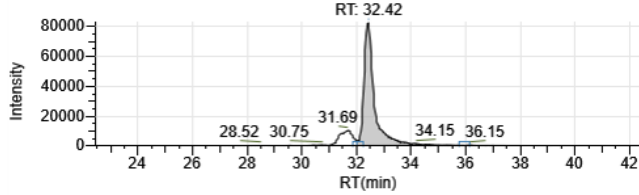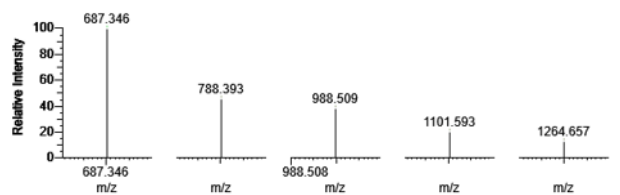

A072

MS-QBIC

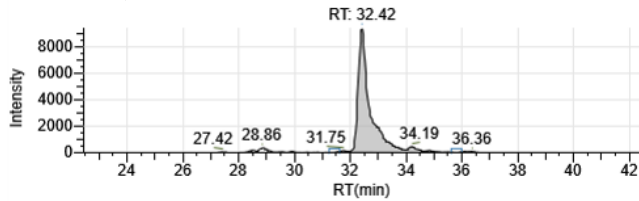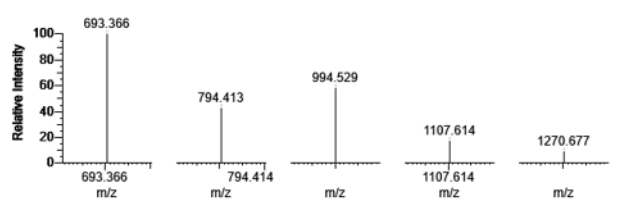

P25

A075

Sample

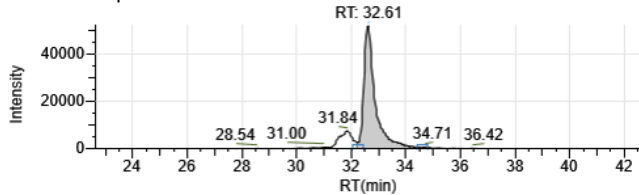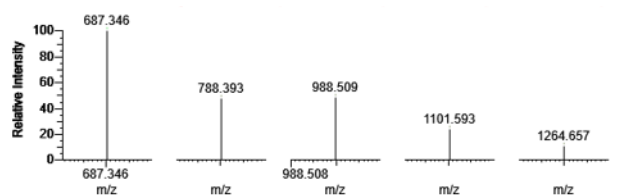

A075

MS-QBIC

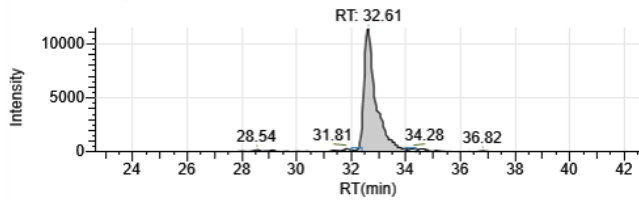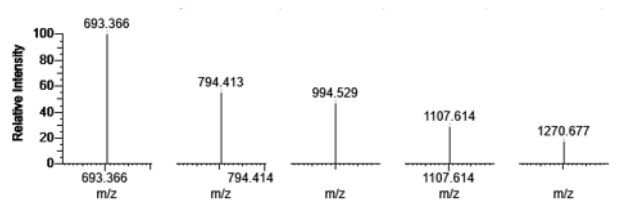

P26

A044

Sample

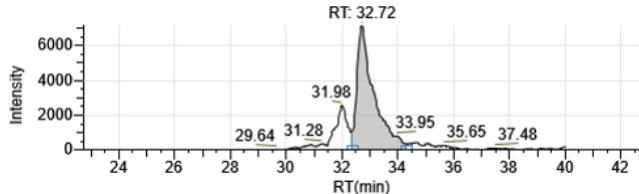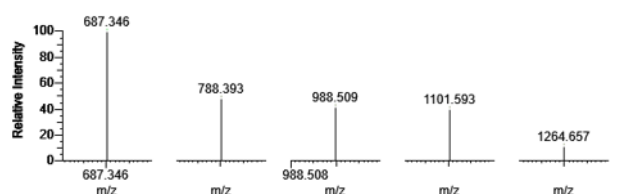

A044

MS-QBIC

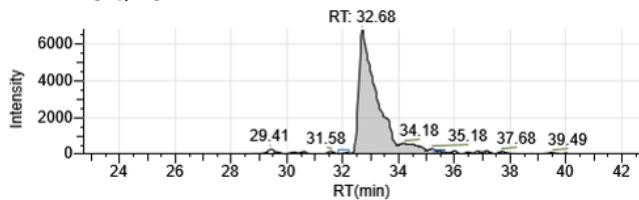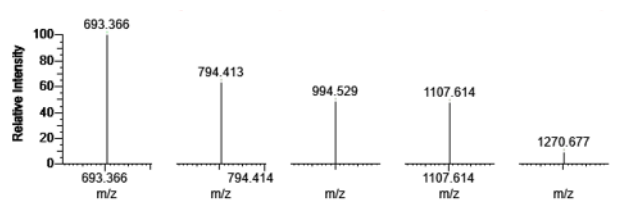

P27  
A058

Sample

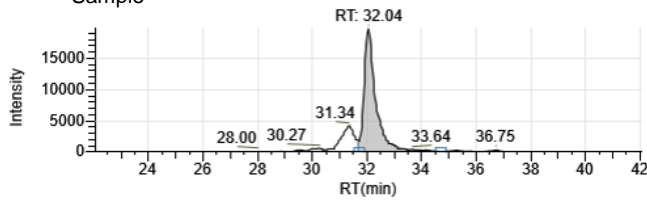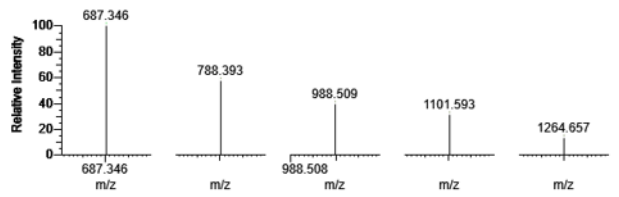

A058 MS-QBIC

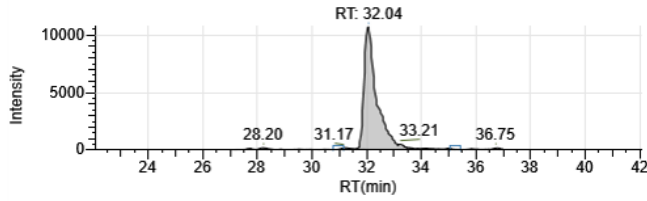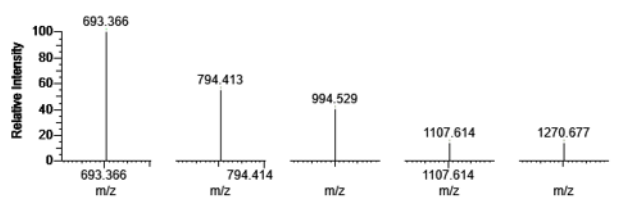

P28  
A069

Sample

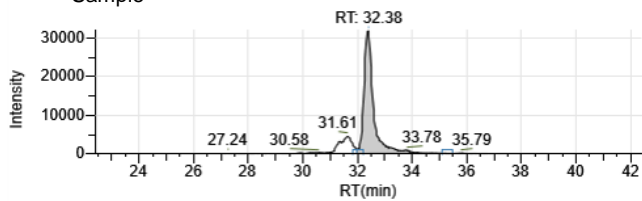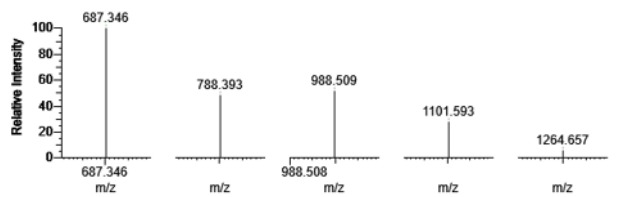

A069 MS-QBIC

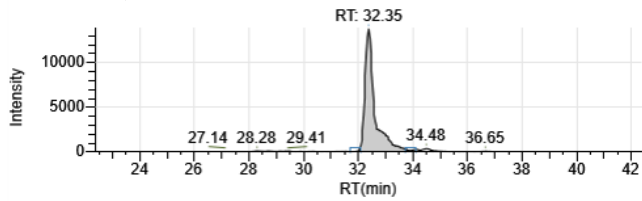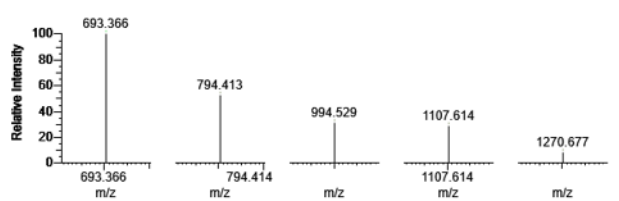

P29  
A056

Sample

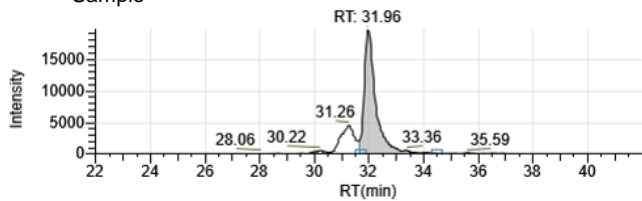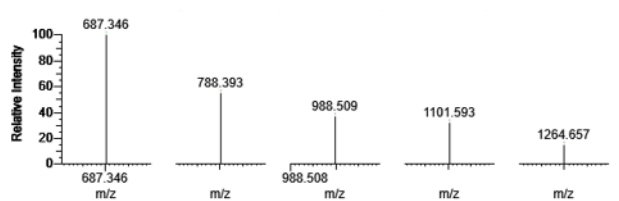

A056 MS-QBIC

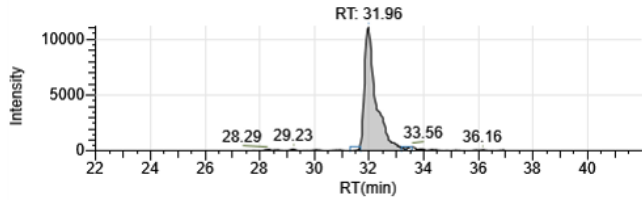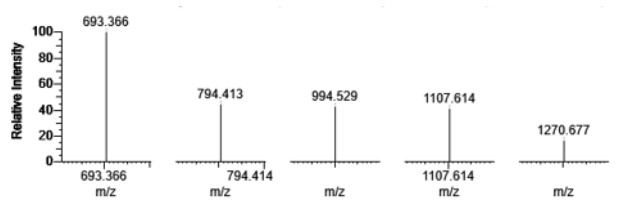

P30  
A079

Sample

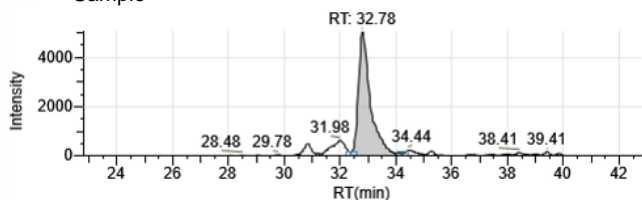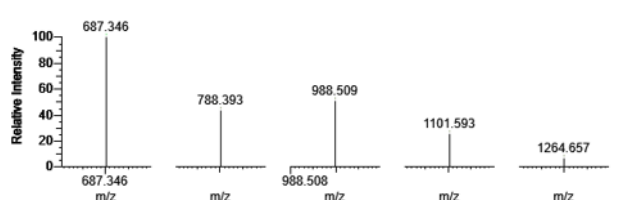

A079 MS-QBIC

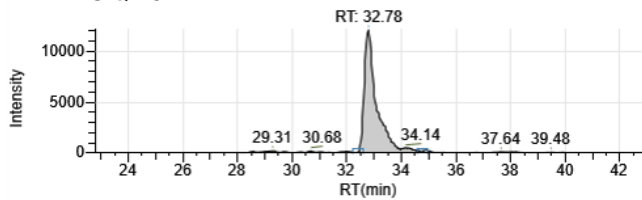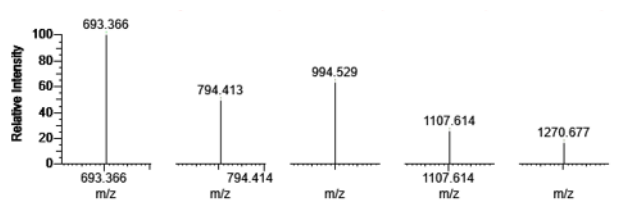

# E B2M (IQVYSR) Heart

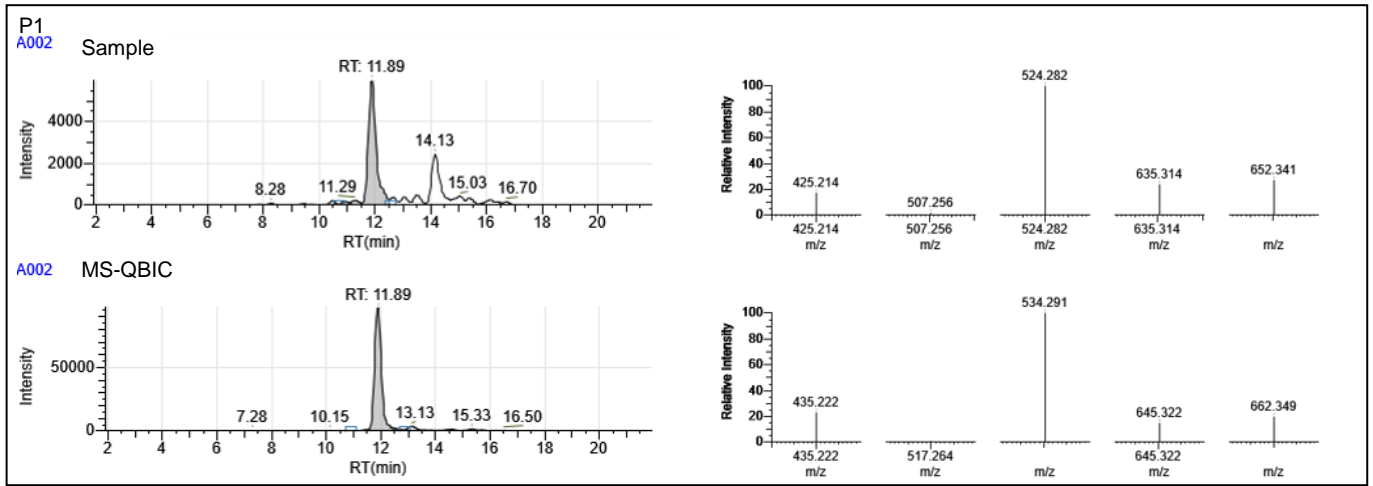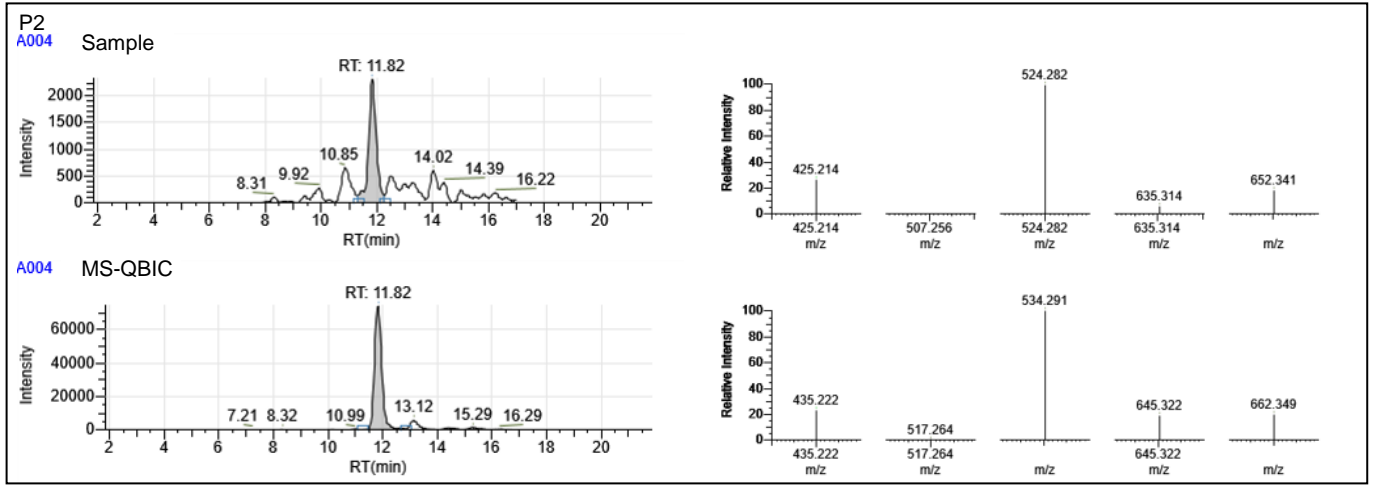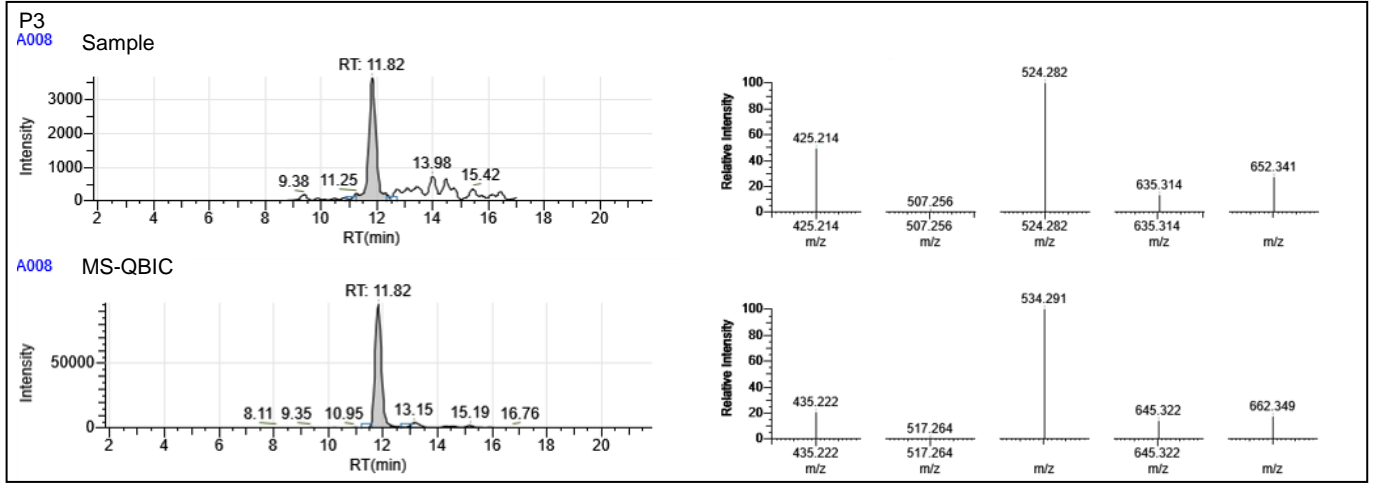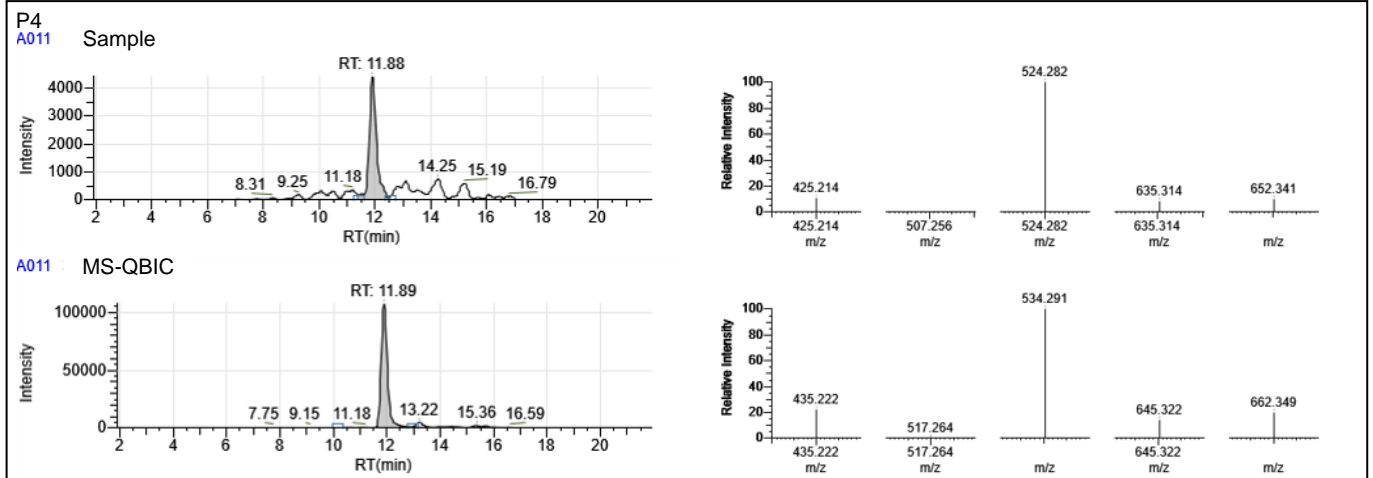



P5  
A014 Sample

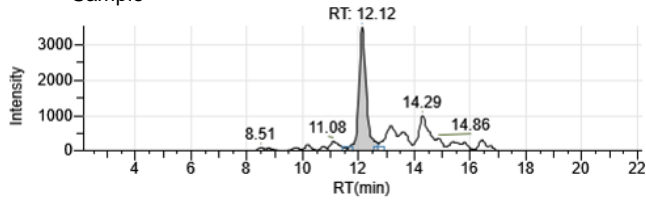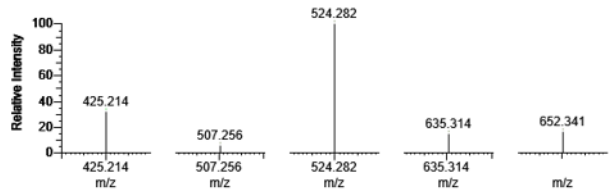

A014 MS-QBIC

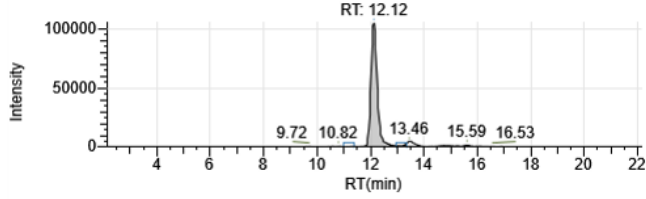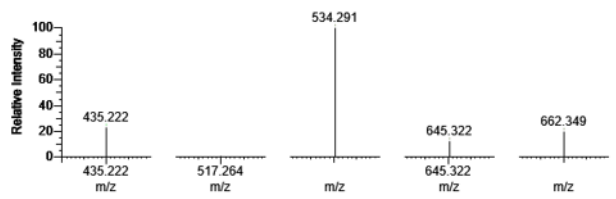

P6  
A016 Sample

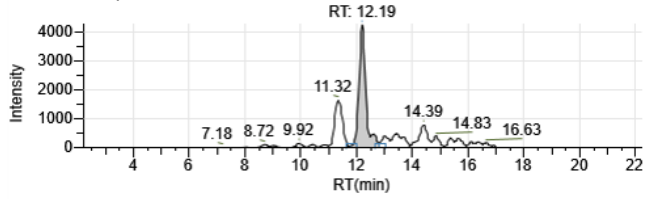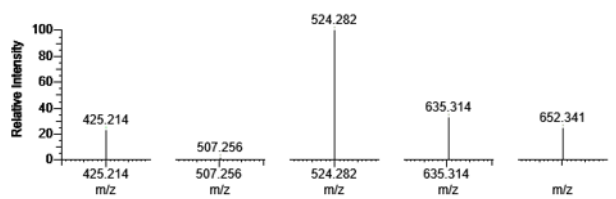

A016 MS-QBIC

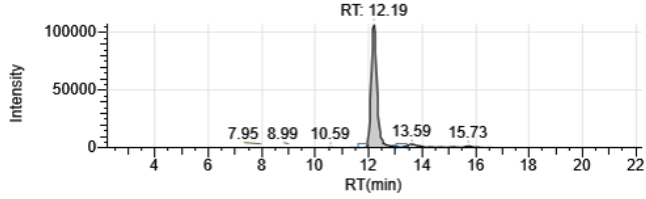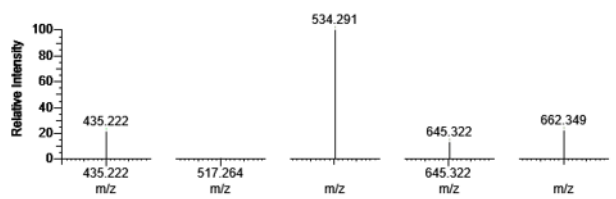

P7  
A077 Sample

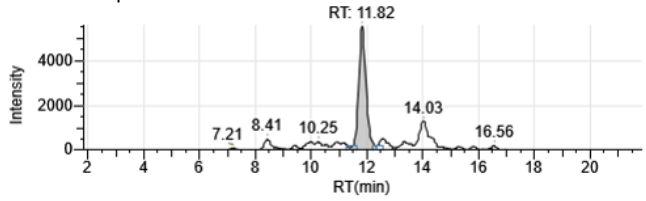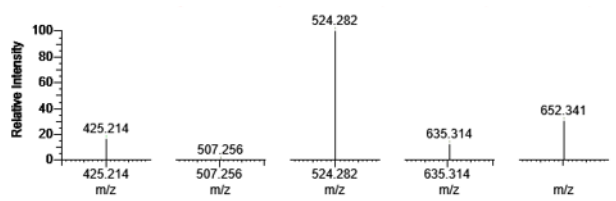

A077 MS-QBIC

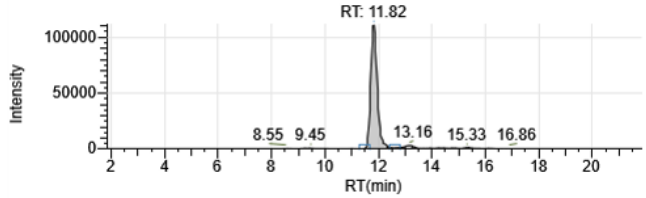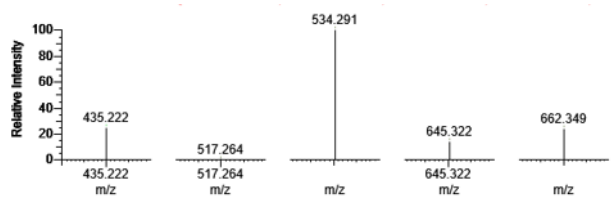

P8  
A020 Sample

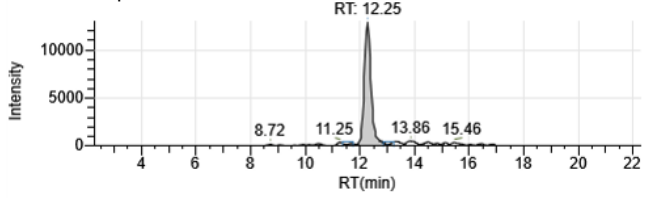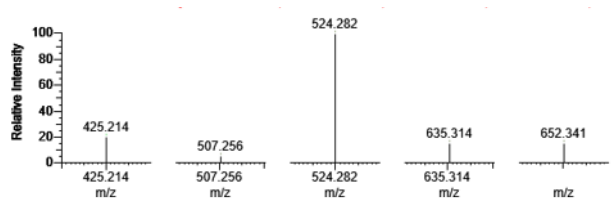

A020 MS-QBIC

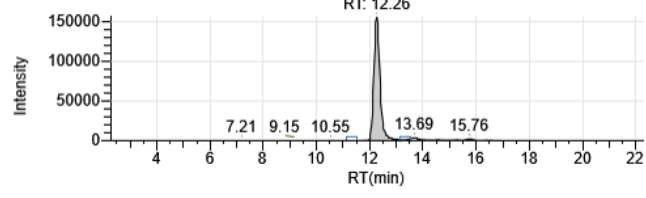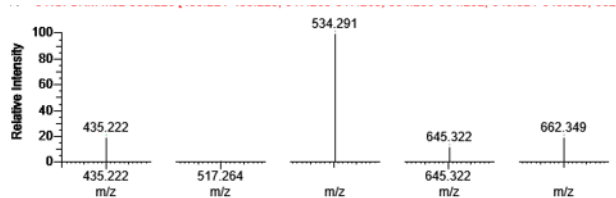



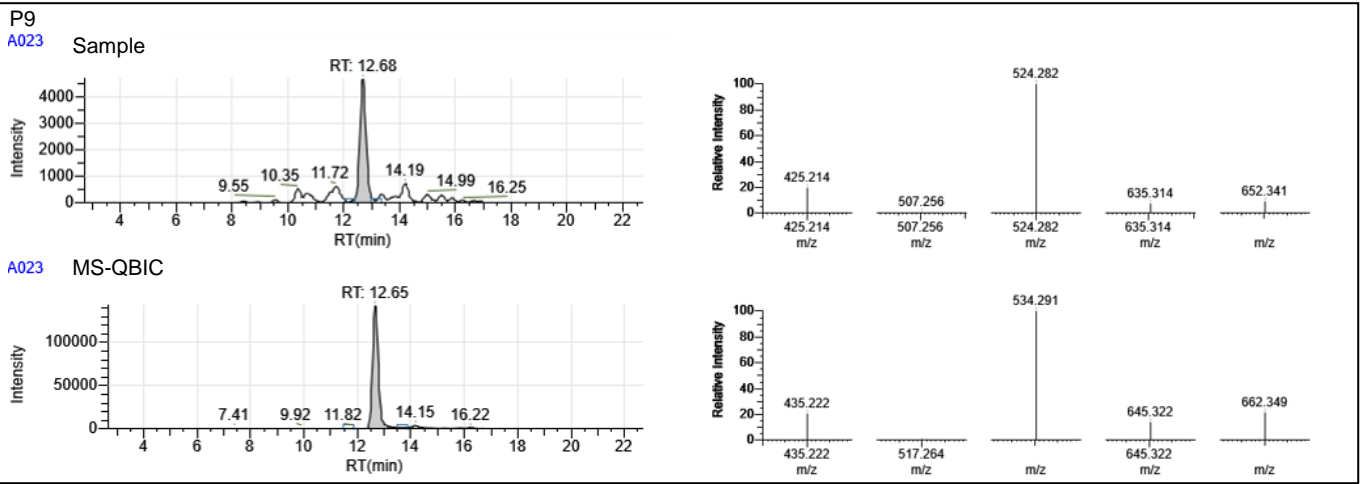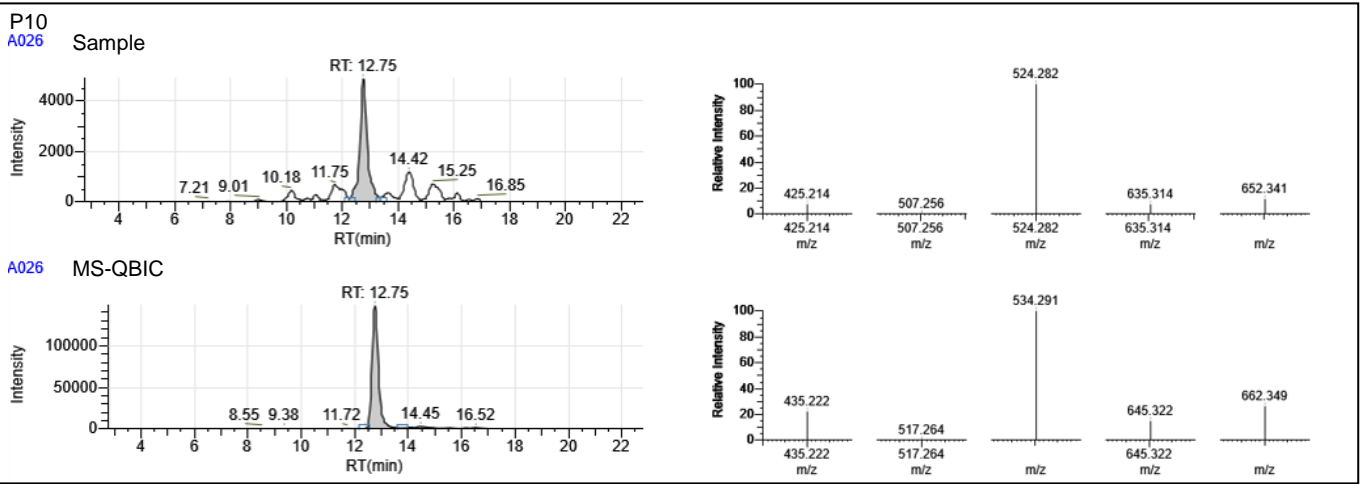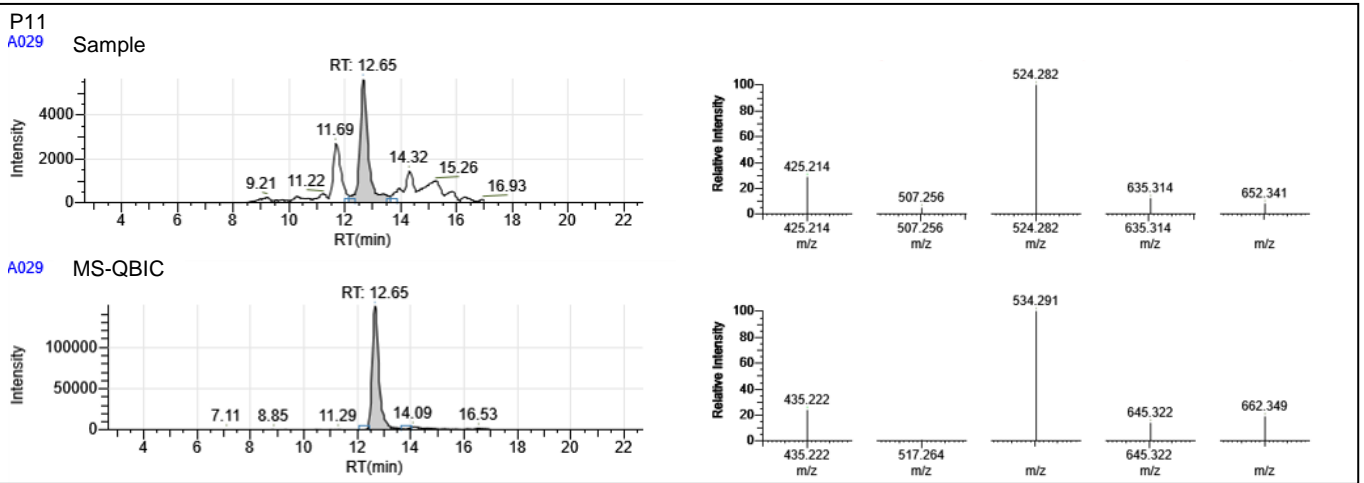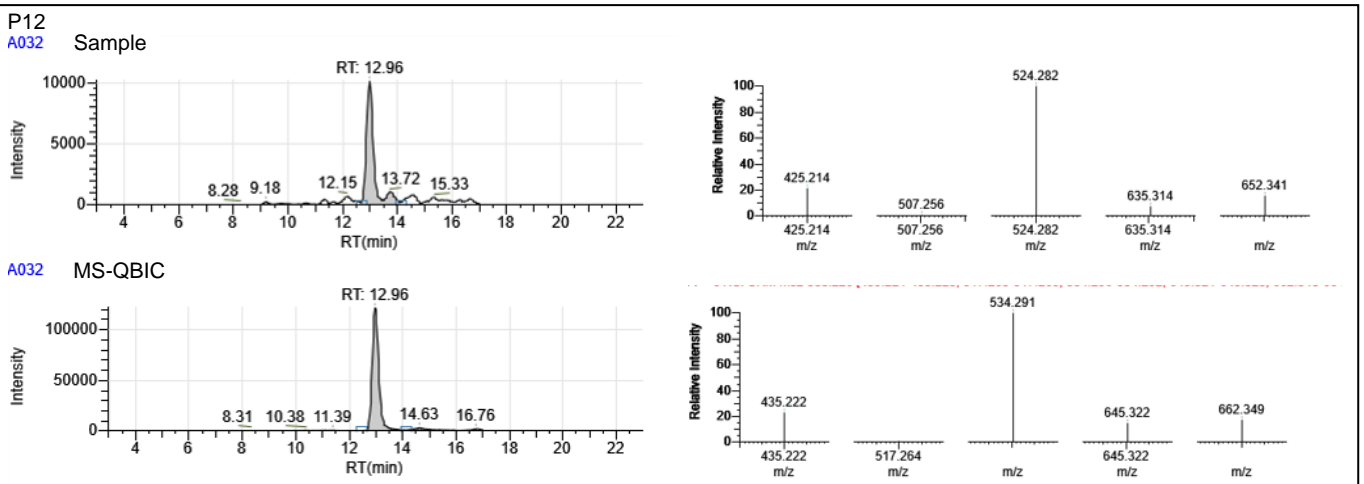

P13  
A034 Sample

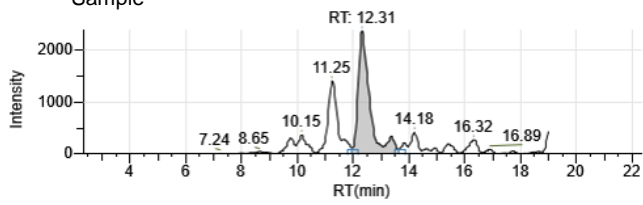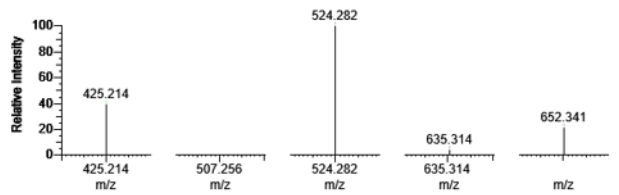

A034 MS-QBIC

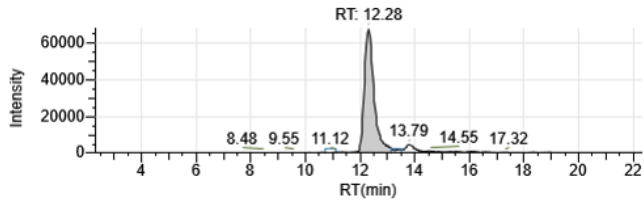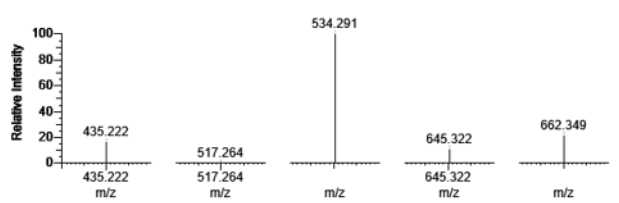

P14  
A038 Sample

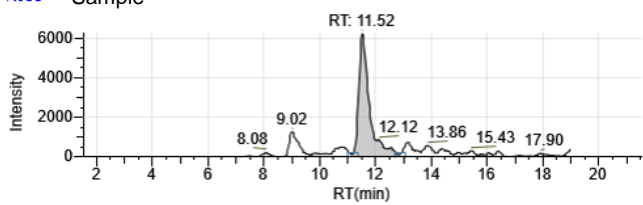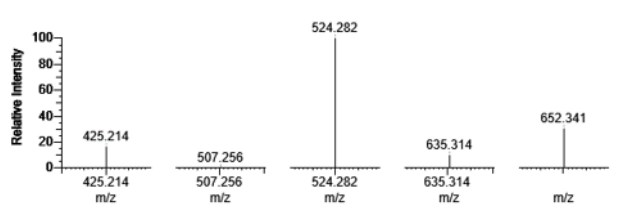

A038 MS-QBIC

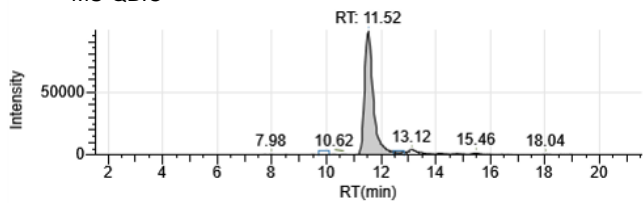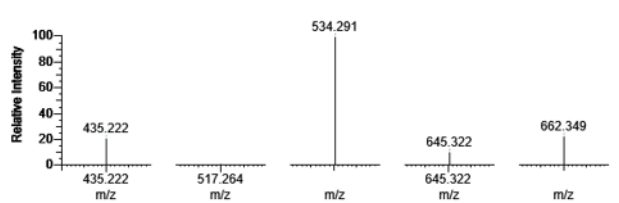

P15  
A086 Sample

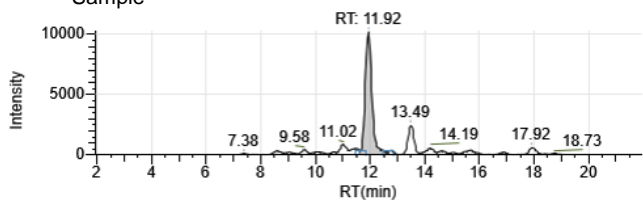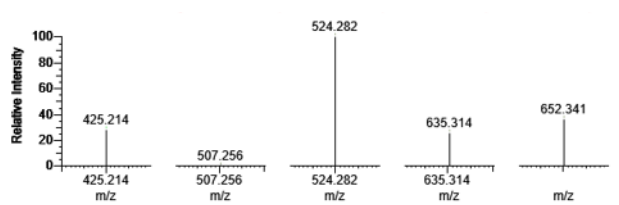

A086 MS-QBIC

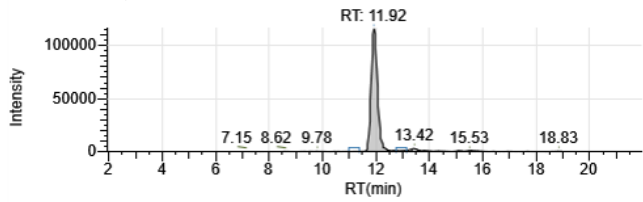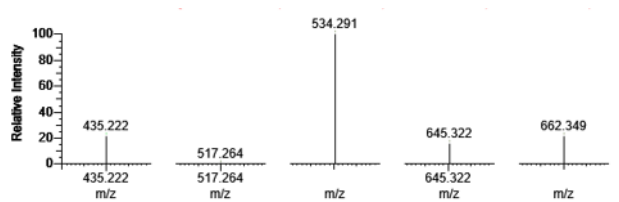

P16  
A089 Sample

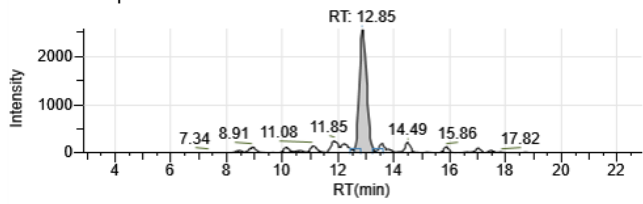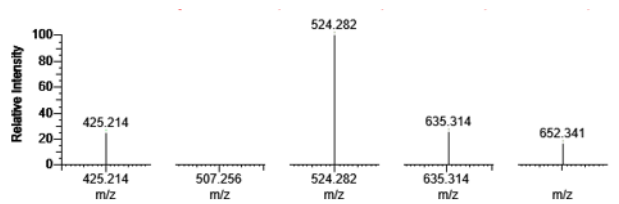

A089 MS-QBIC

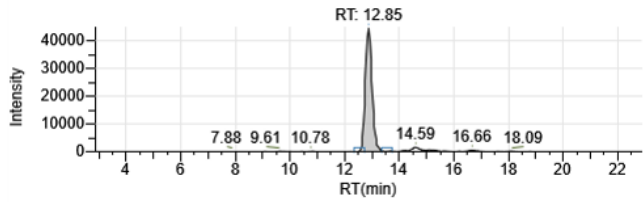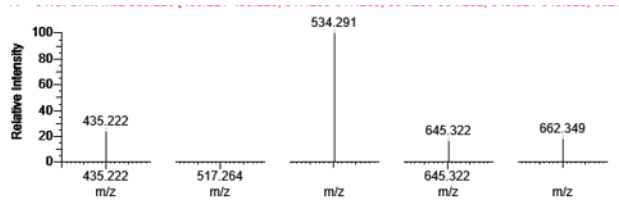

P17  
A048 Sample

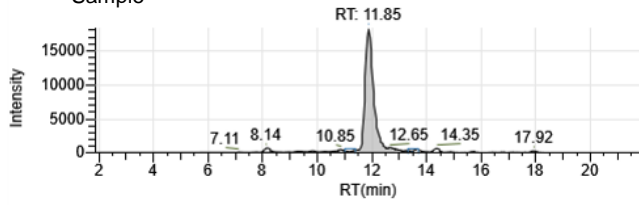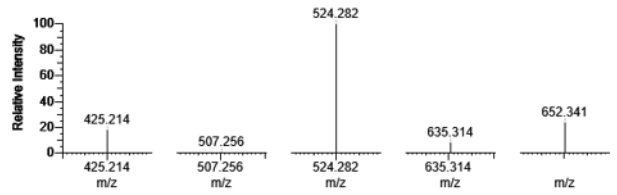

A048 MS-QBIC

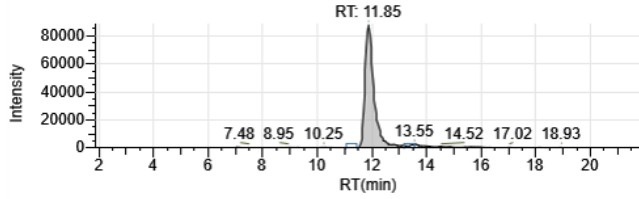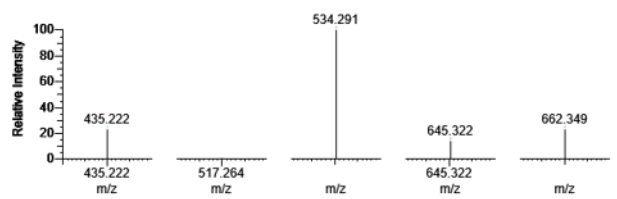

P18  
A050 Sample

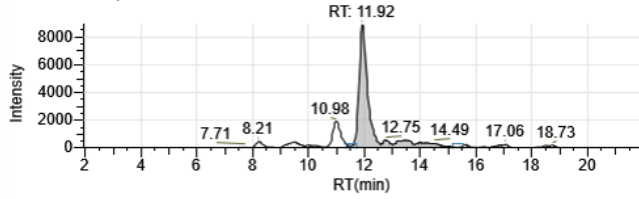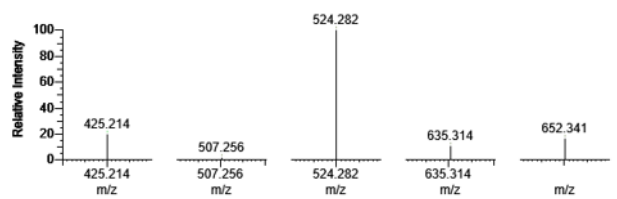

A050 MS-QBIC

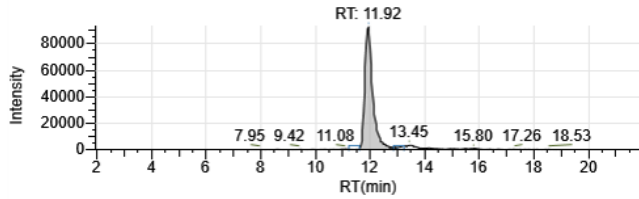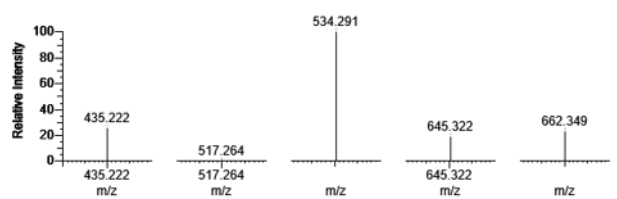

P19  
A053 Sample

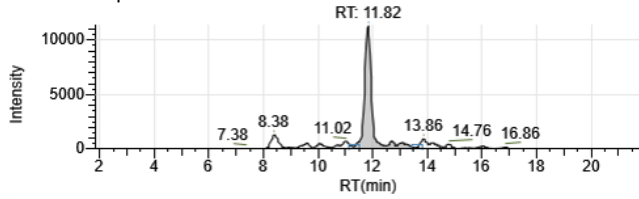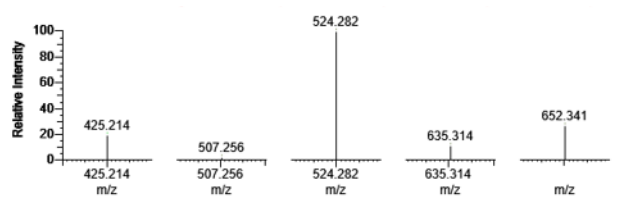

A053 MS-QBIC

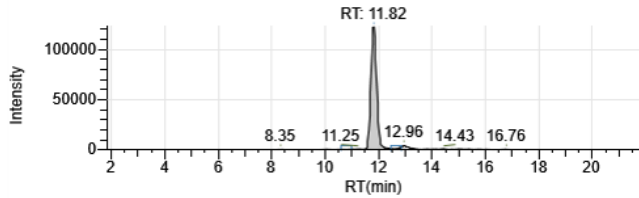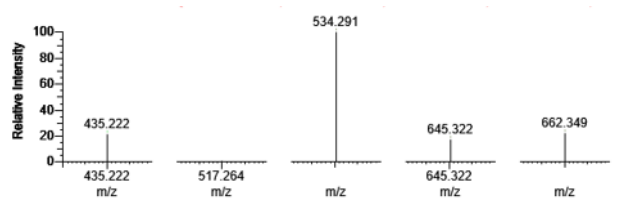

P20  
A062 Sample

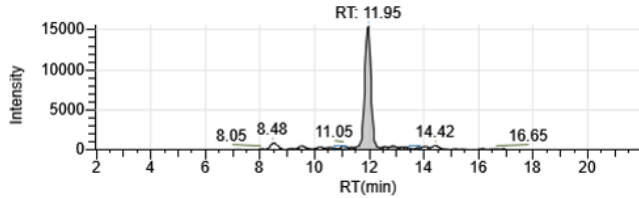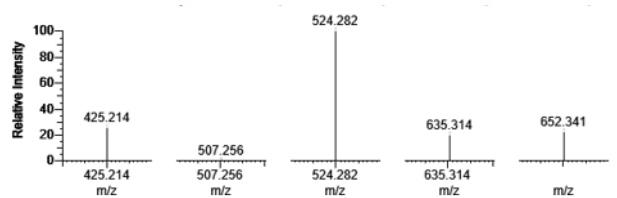

A062 MS-QBIC

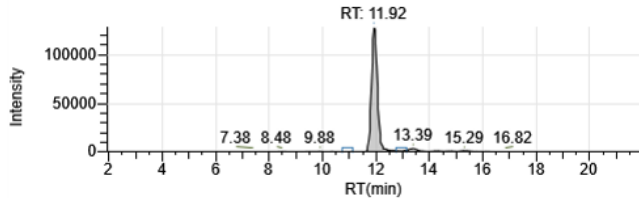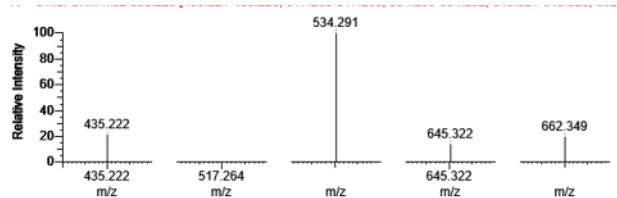

P21  
A066 Sample

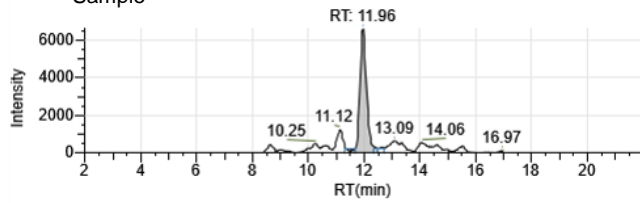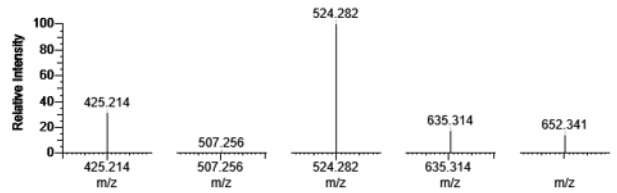

A066 MS-QBIC

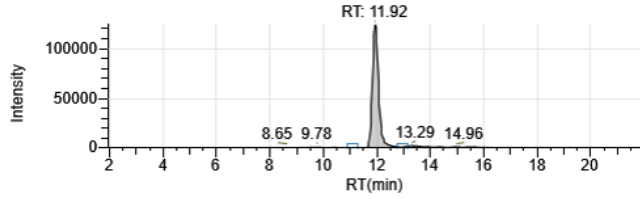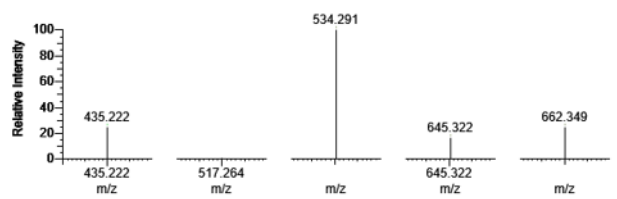

P22  
A041 Sample

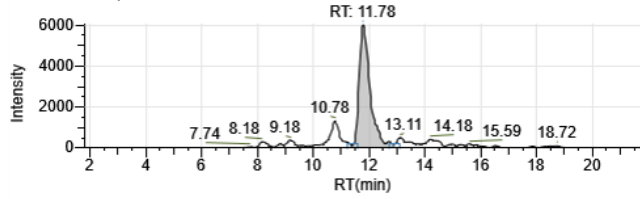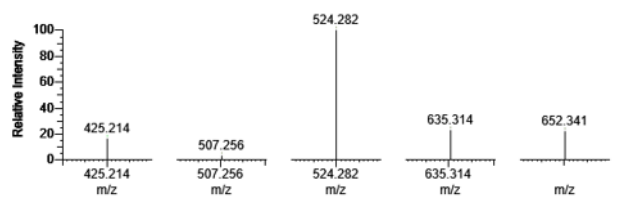

A041 MS-QBIC

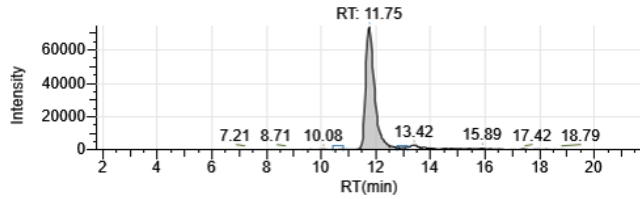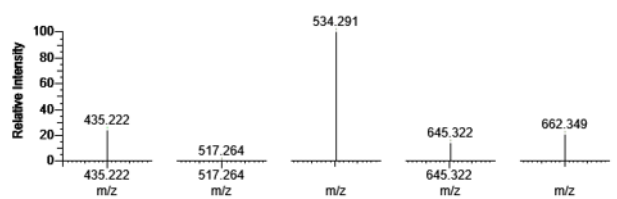

P23  
A083 Sample

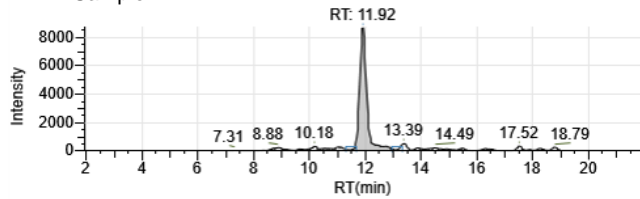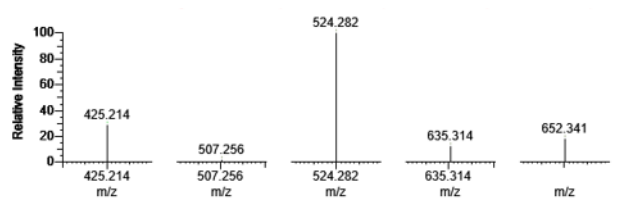

A083 MS-QBIC

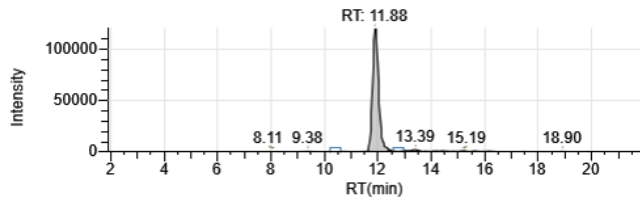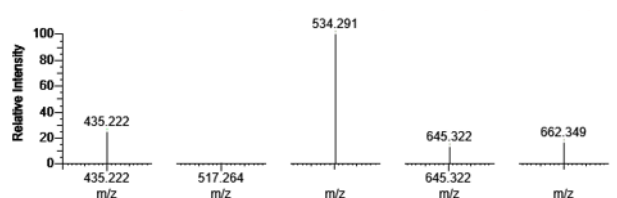

P24  
A071 Sample

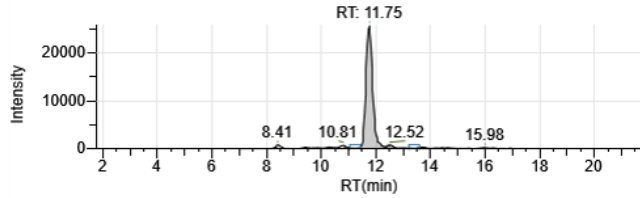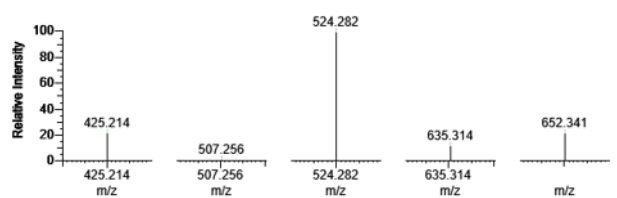

A071 MS-QBIC

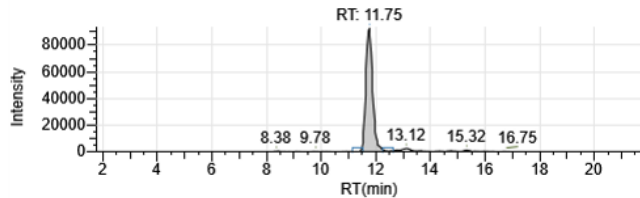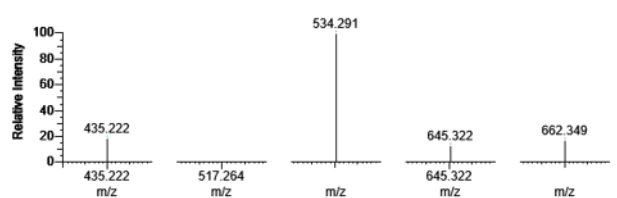

P25  
A075

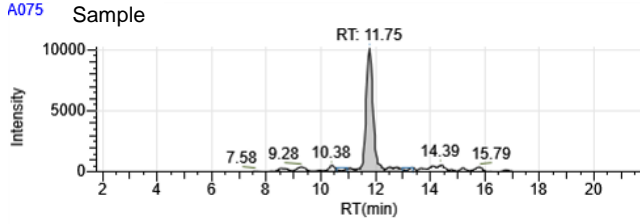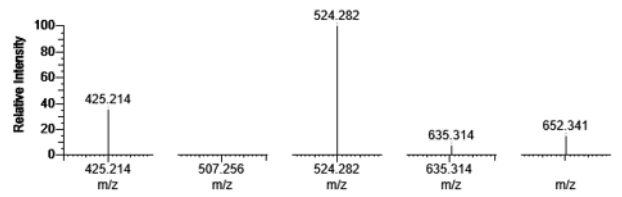

A075 MS-QBIC

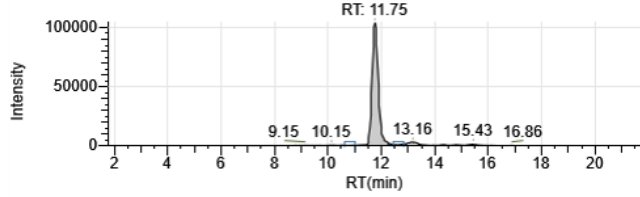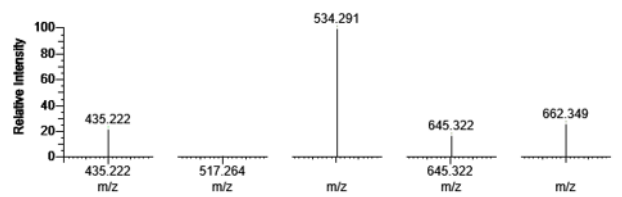

P26  
A044

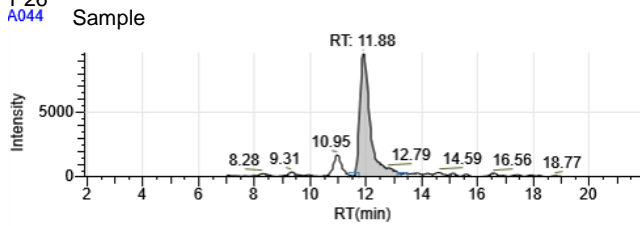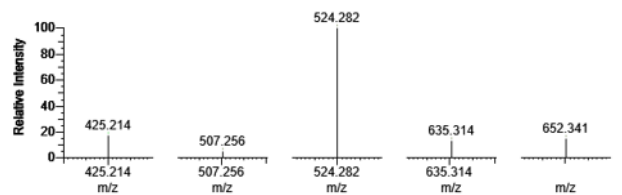

A044 MS-QBIC

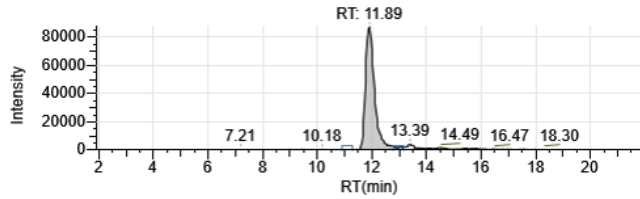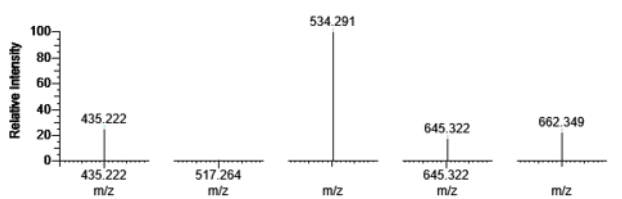

P27  
A058

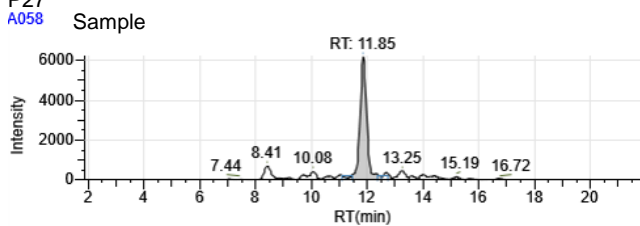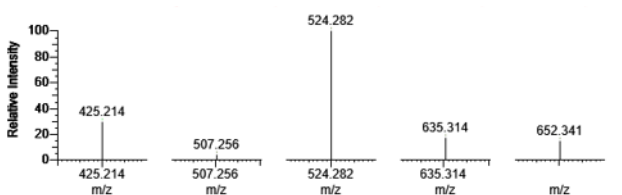

A058 MS-QBIC

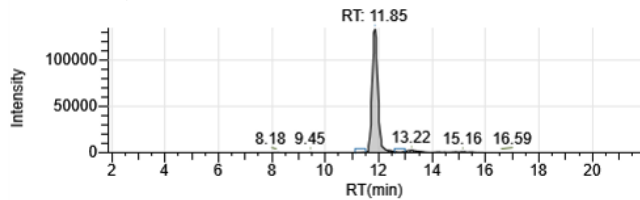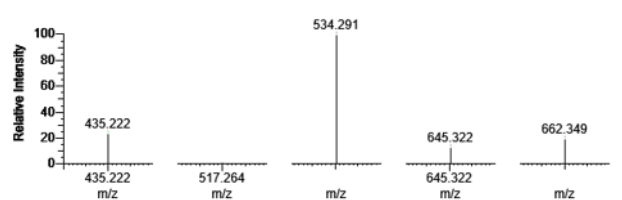

P28  
A067

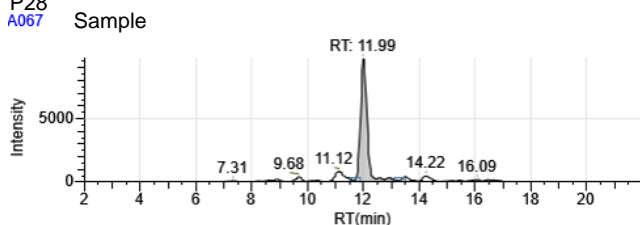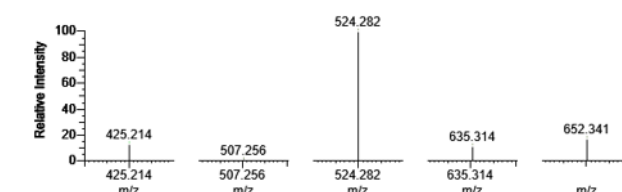

A067 MS-QBIC

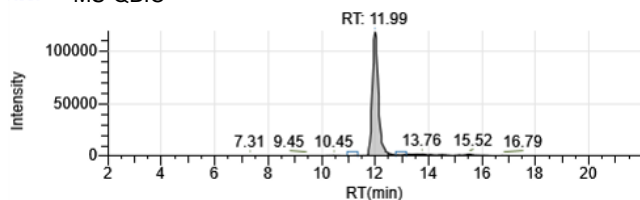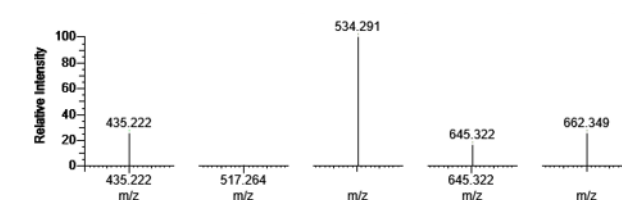

P29  
A056 Sample

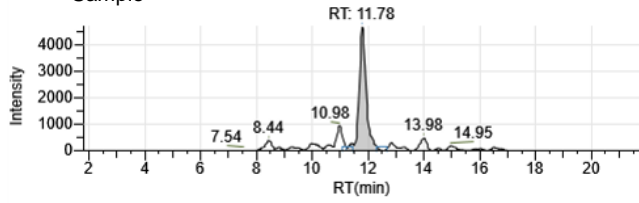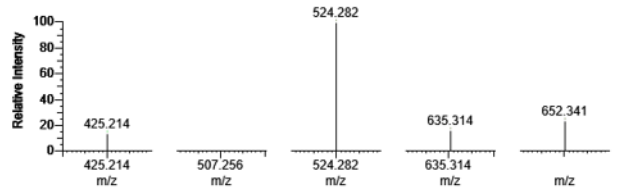

A056 MS-QBIC

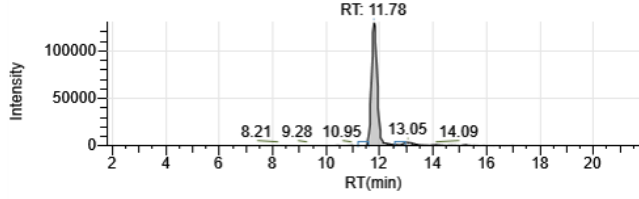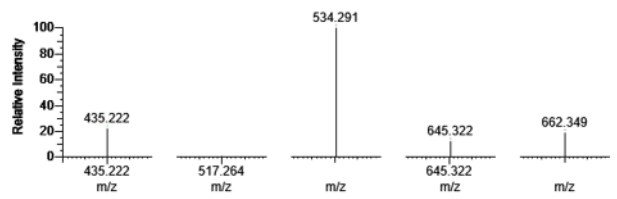

P30  
A080 Sample

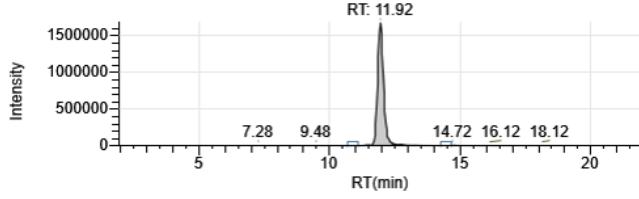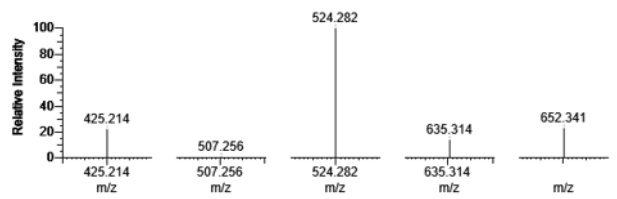

A080 MS-QBIC

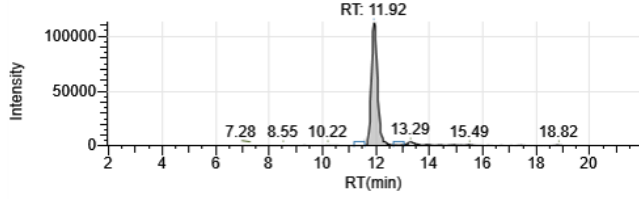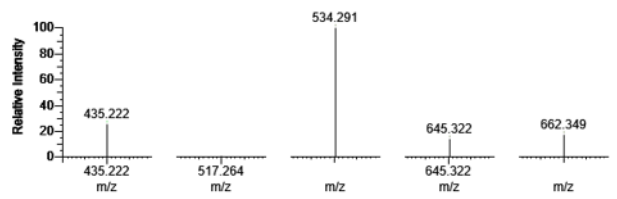

# F Apo A1 (DLATVYVDVLK) Heart

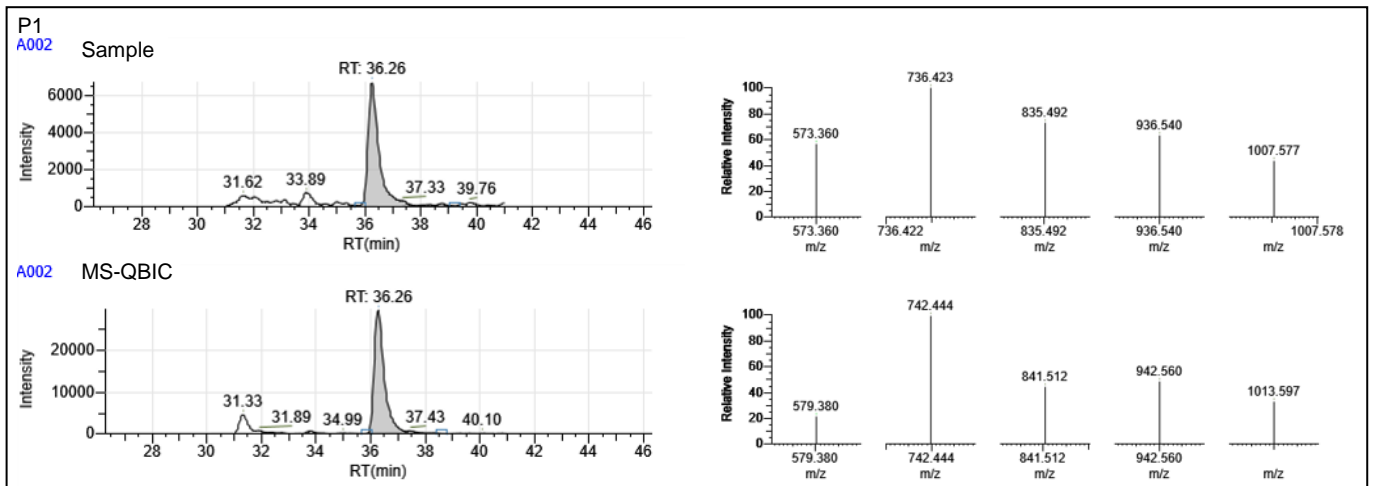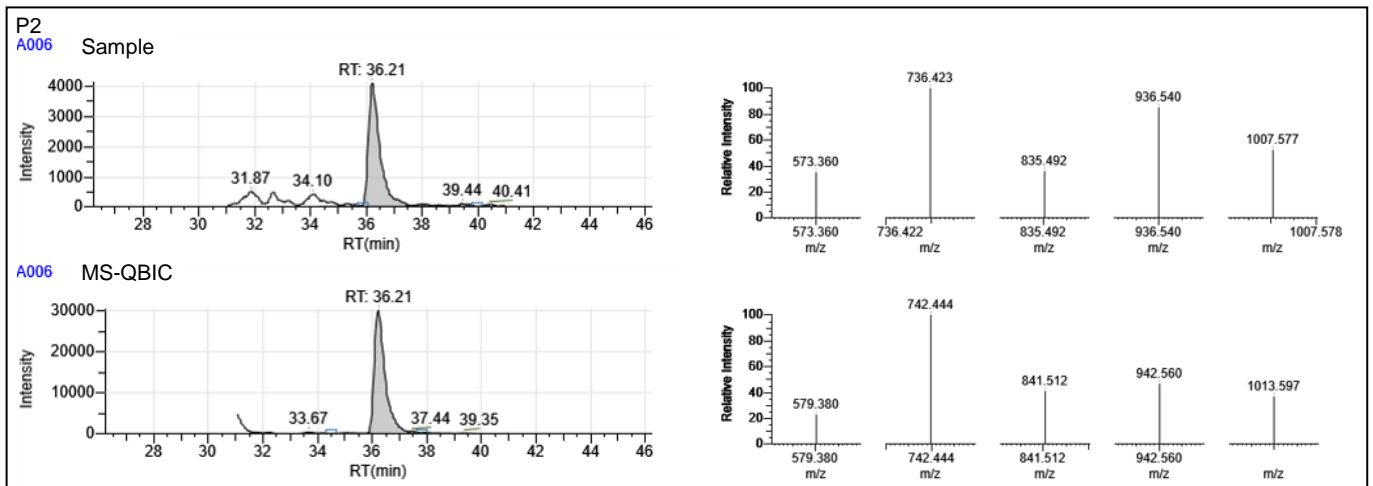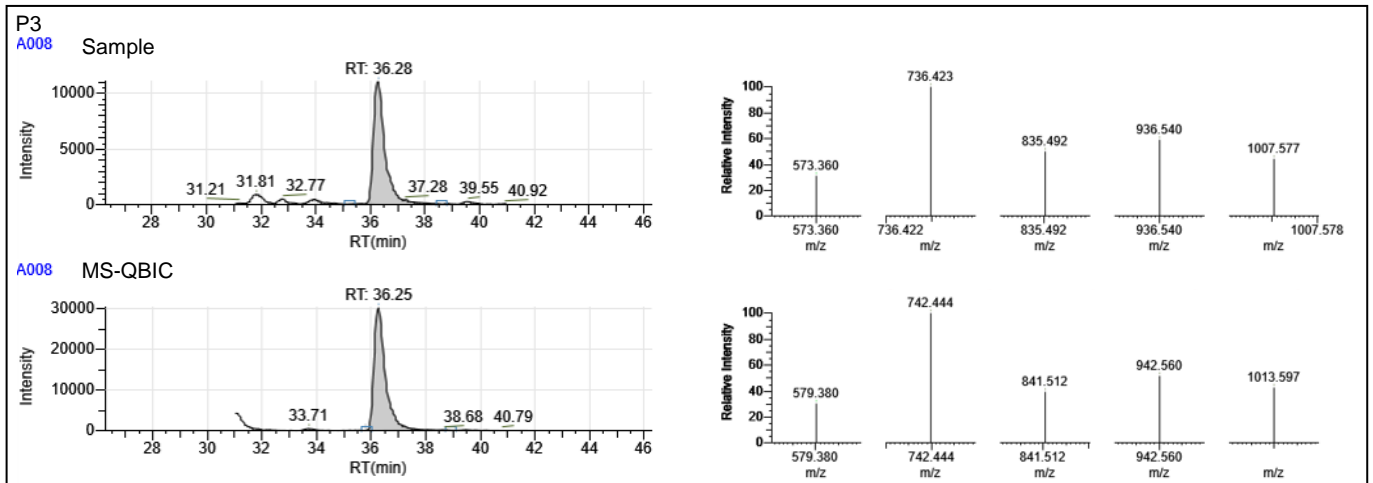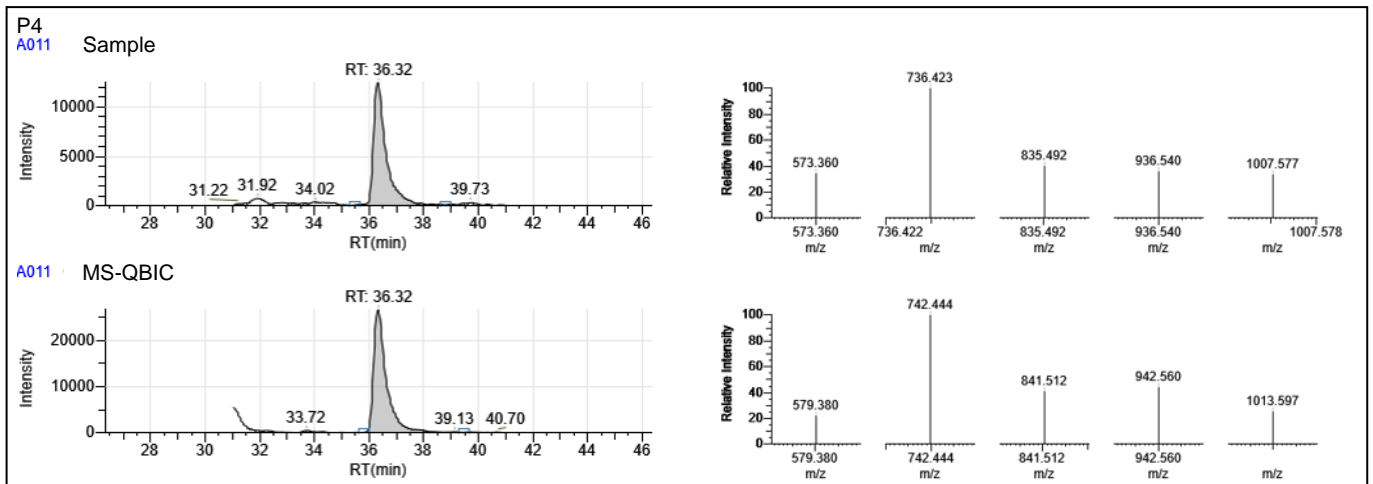

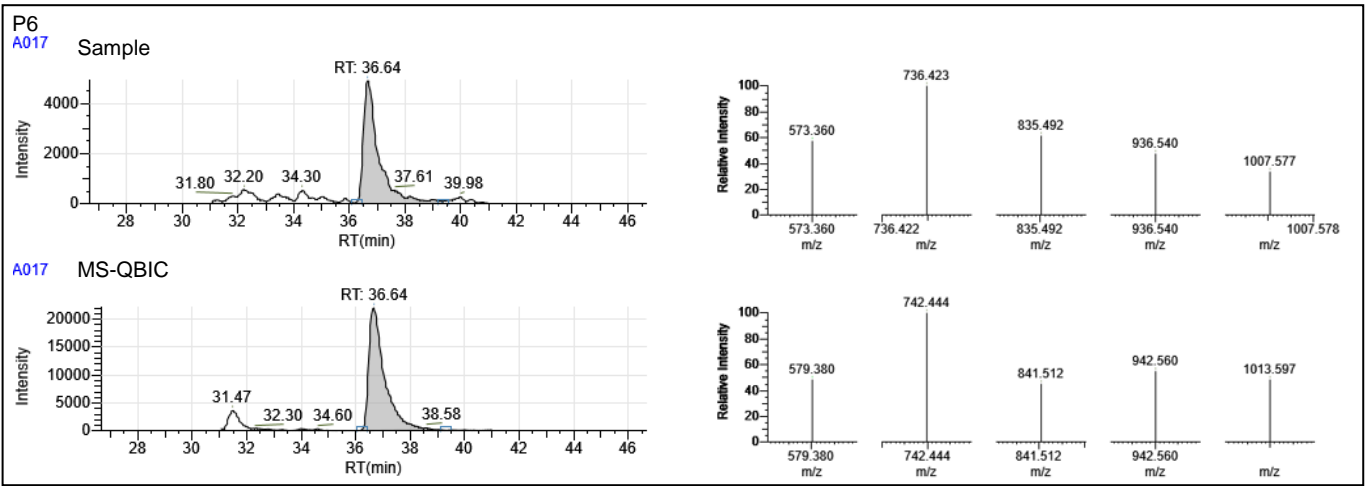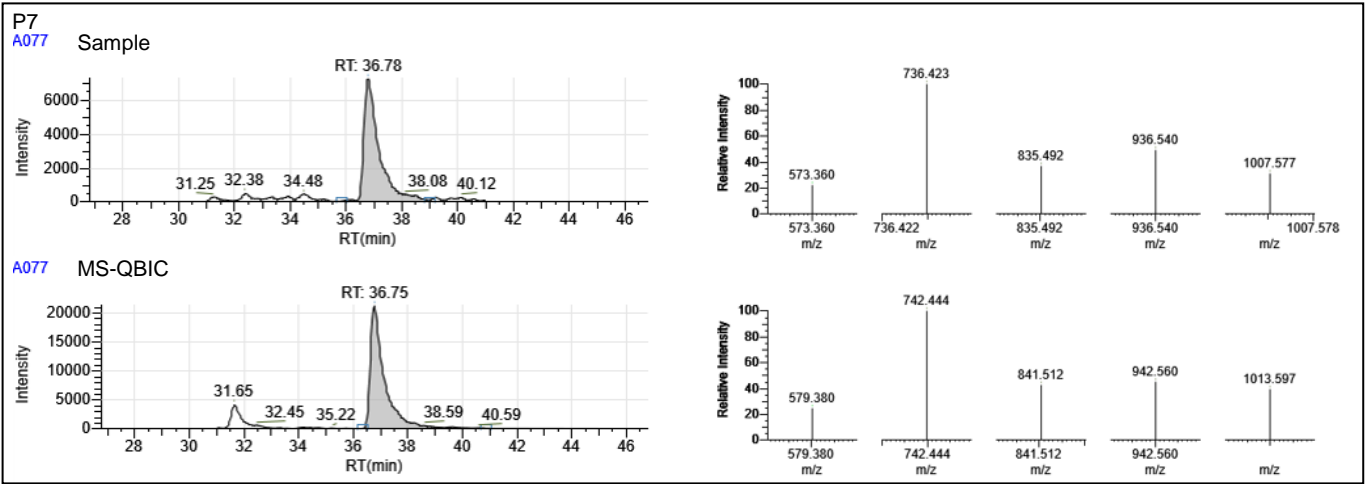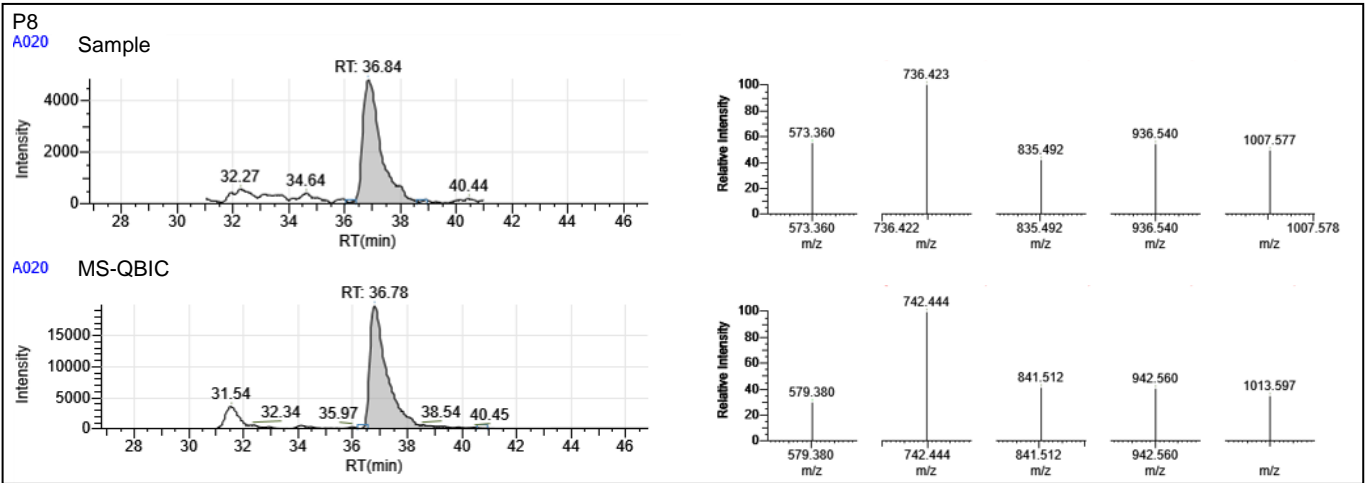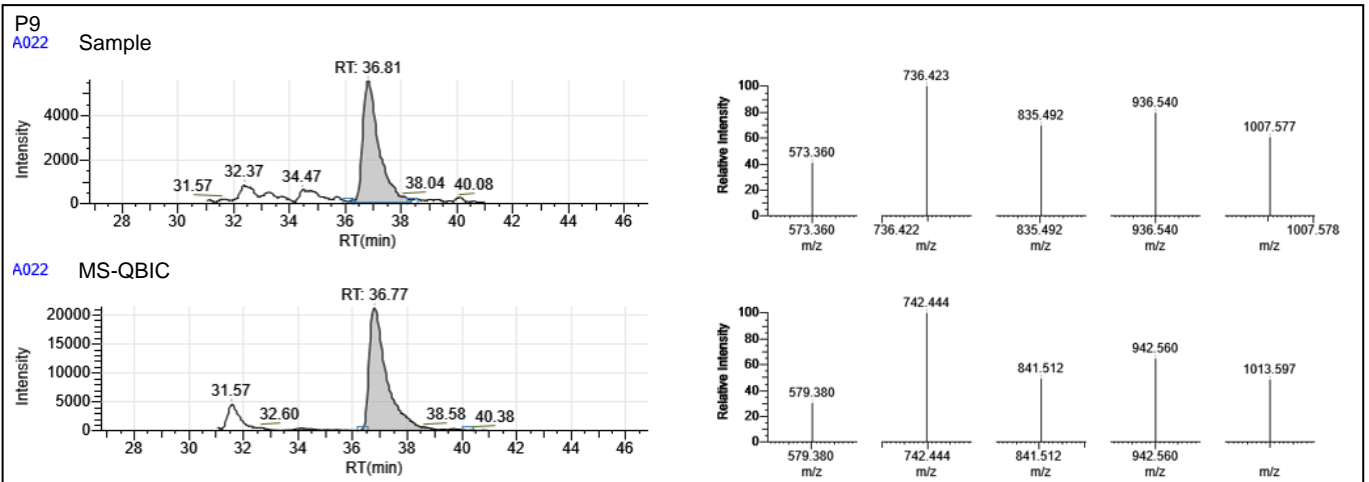



P10  
A026 Sample

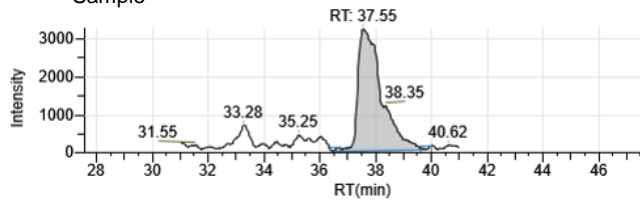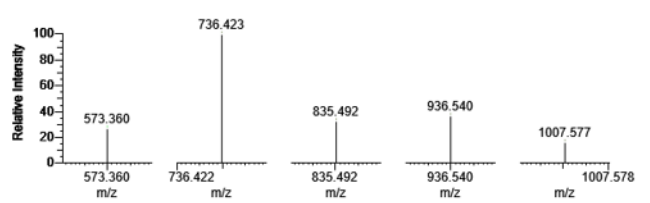

A026 MS-QBIC

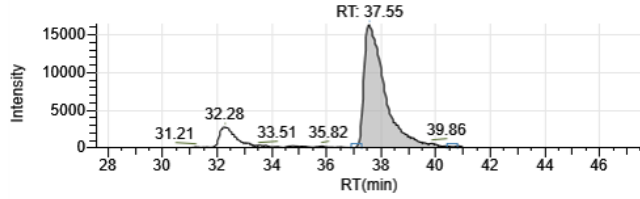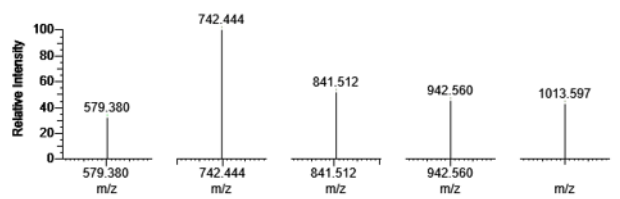

P11  
A029 Sample

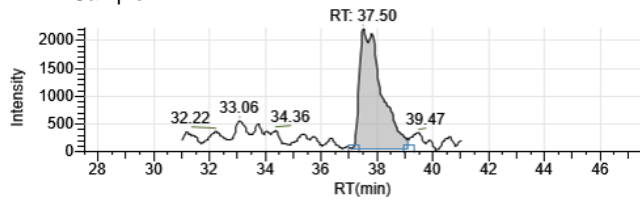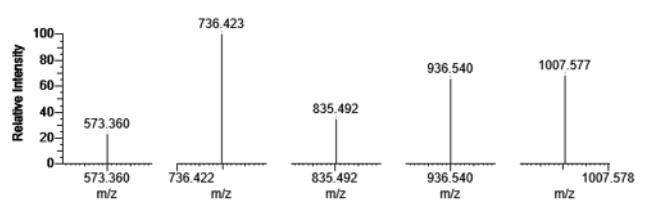

A029 MS-QBIC

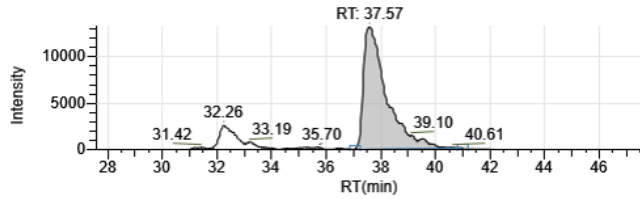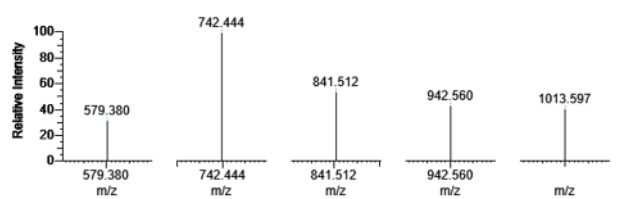

P12  
A032 Sample

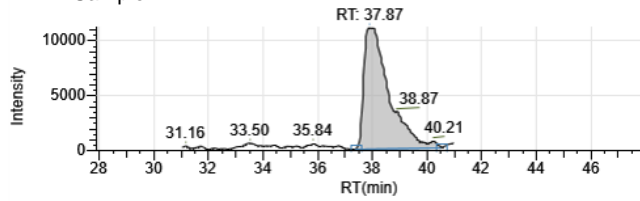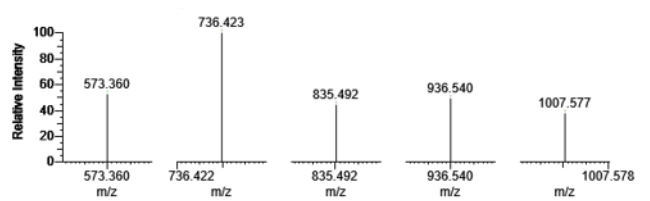

A032 MS-QBIC

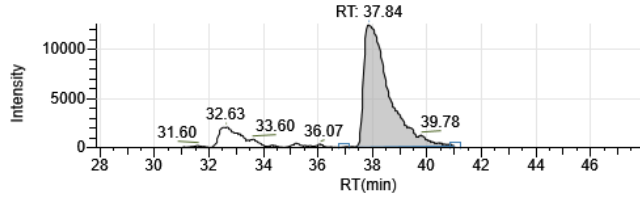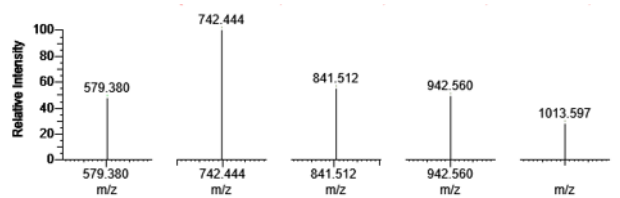

P14  
A038 Sample

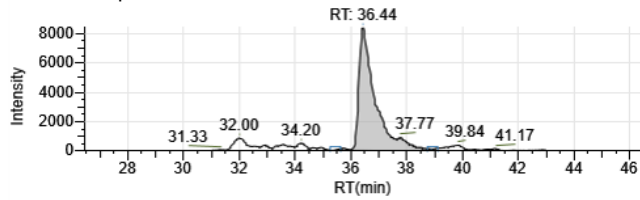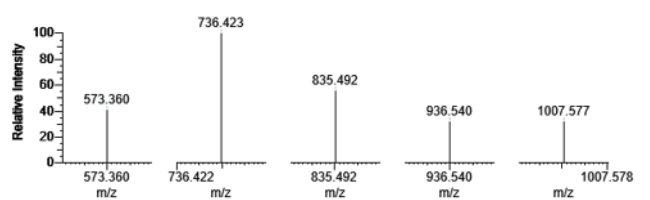

A038 MS-QBIC

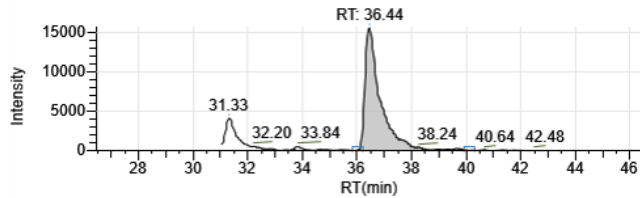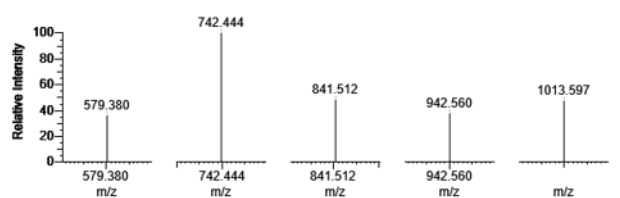

P15  
A086

Sample

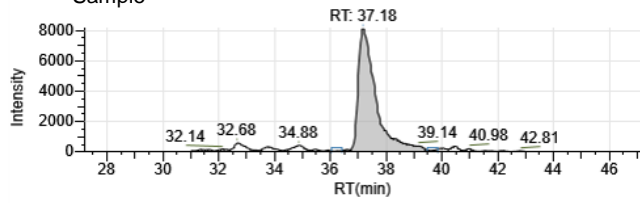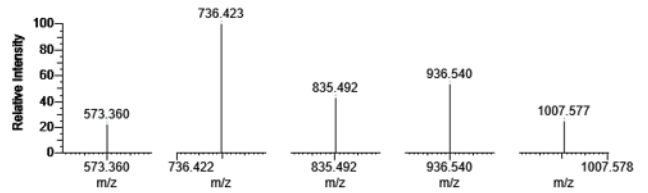

A086 MS-QBIC

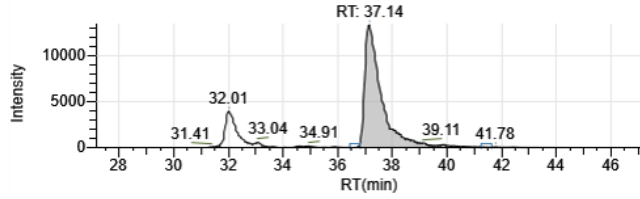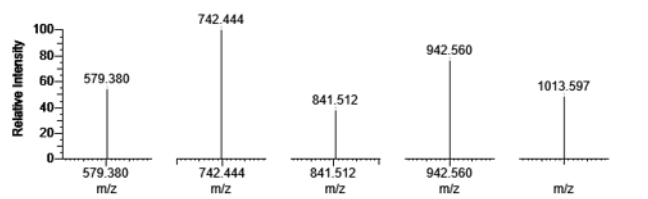

P17  
A046

Sample

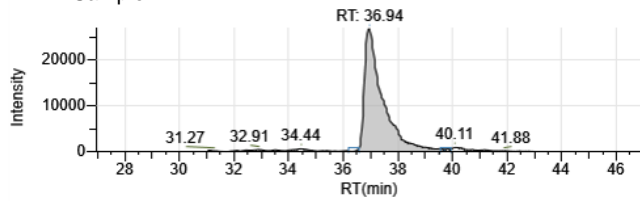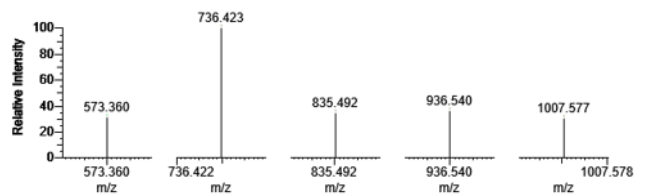

A046 MS-QBIC

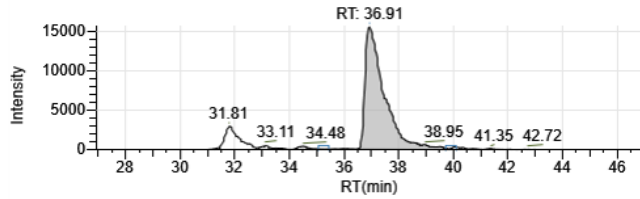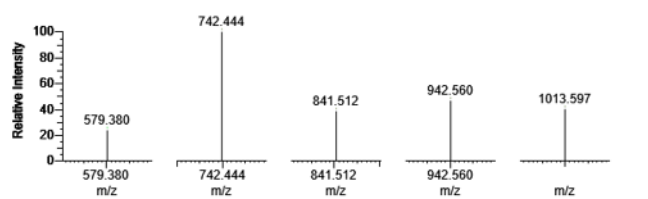

P18  
A050

Sample

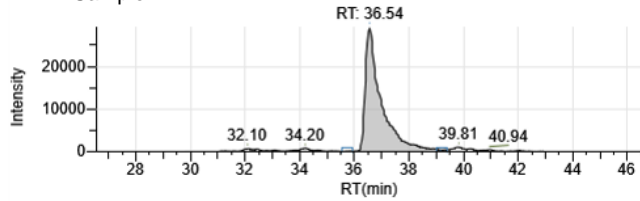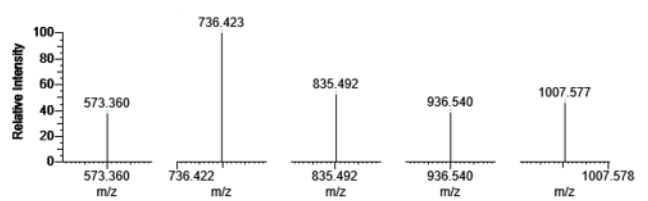

A050 MS-QBIC

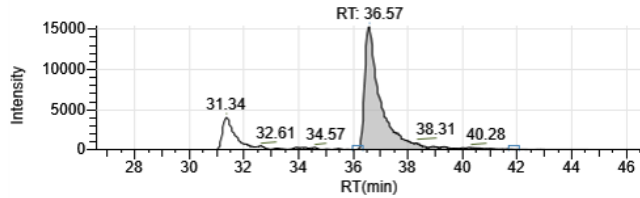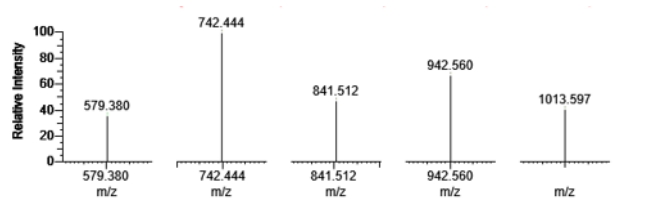

P19  
A053

Sample

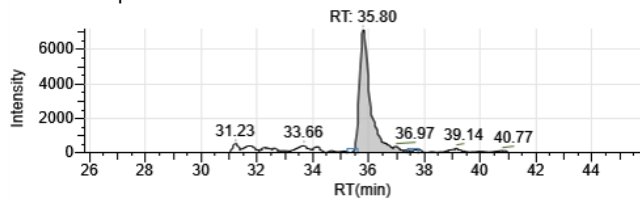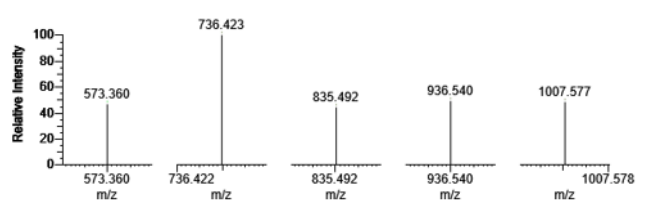

A053 MS-QBIC

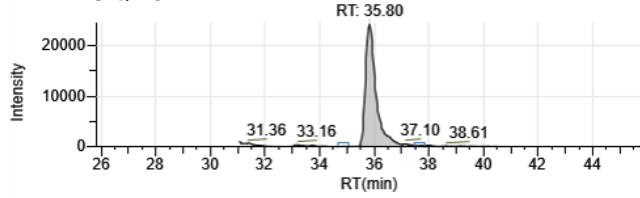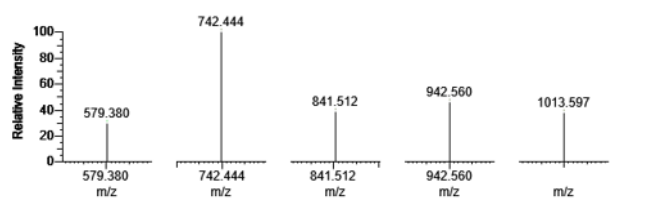

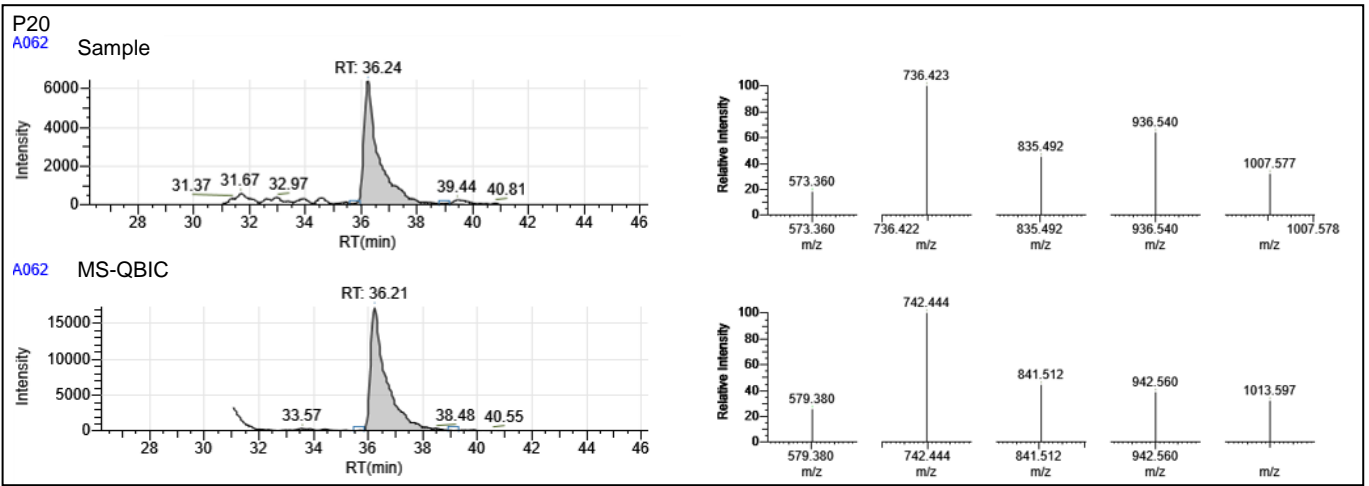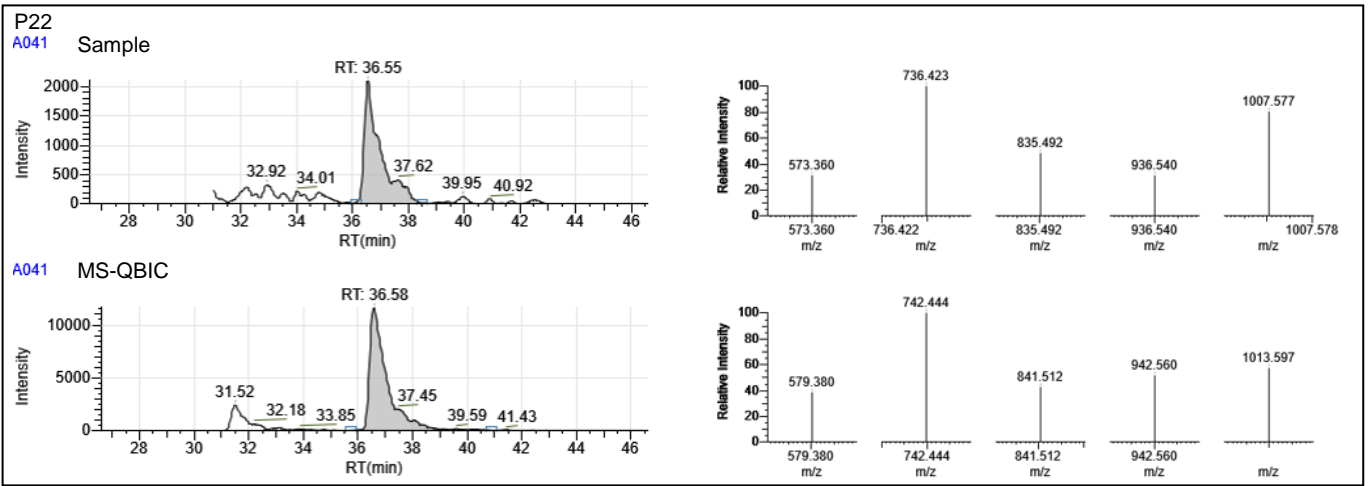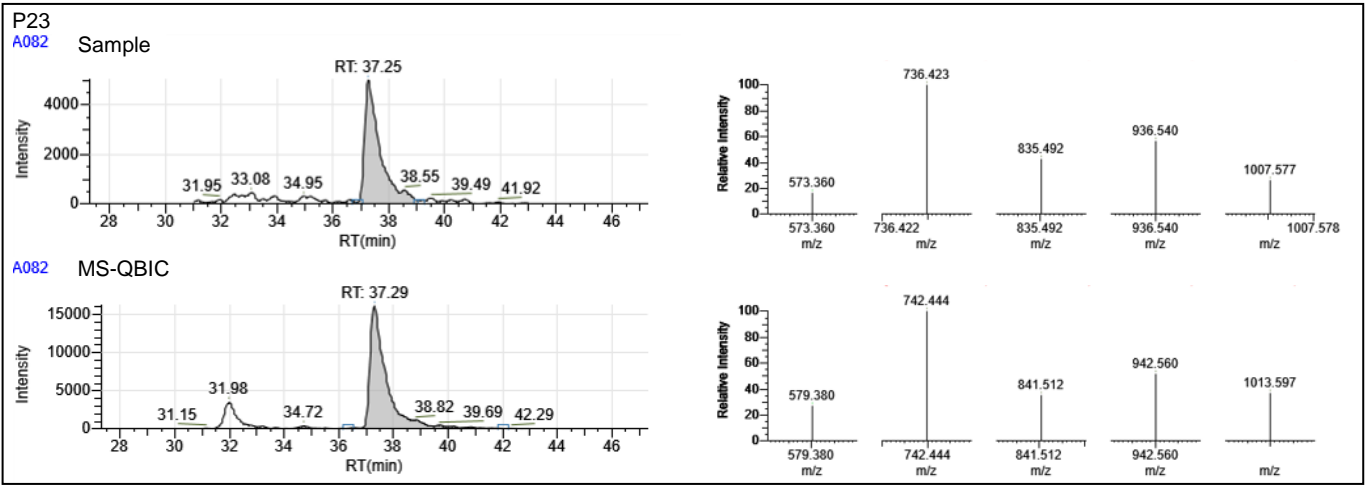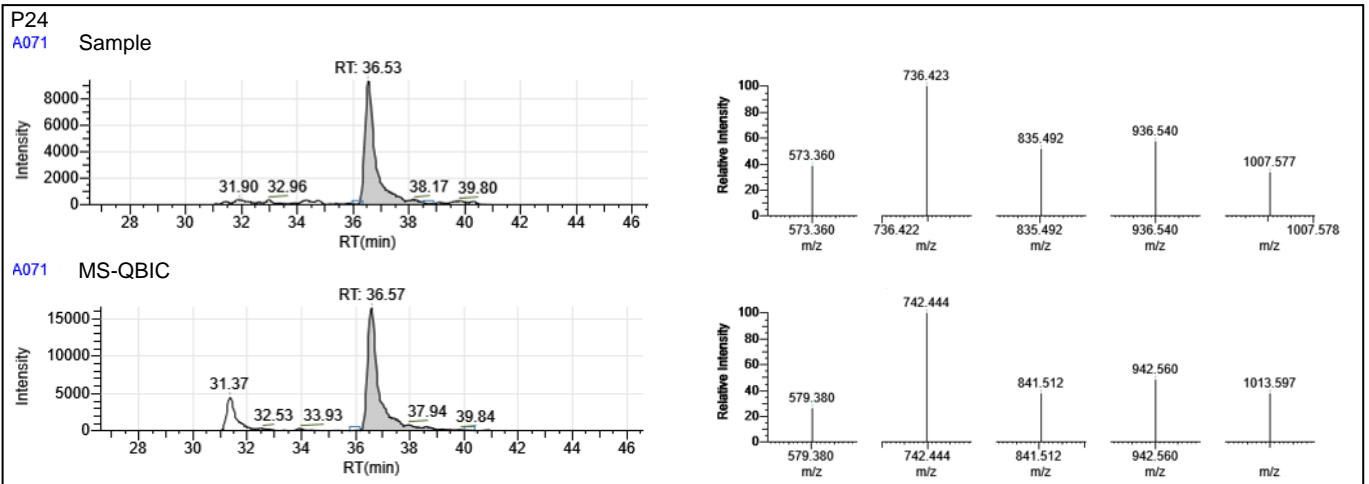

P25  
A074

Sample

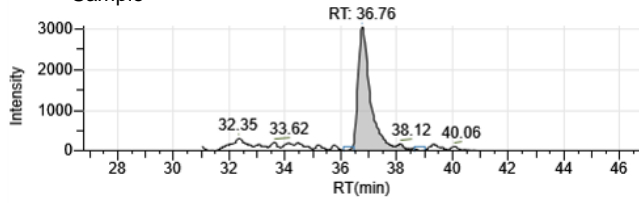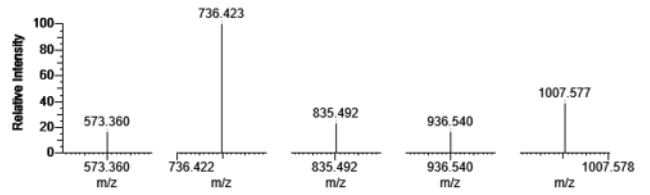

A074 MS-QBIC

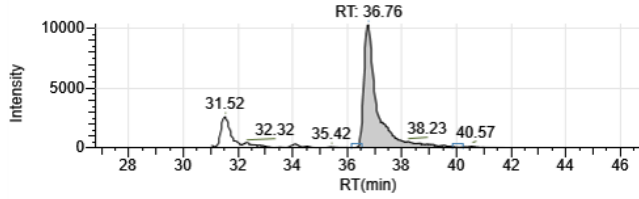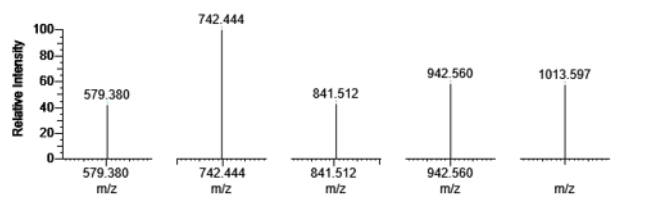

P26  
A043

Sample

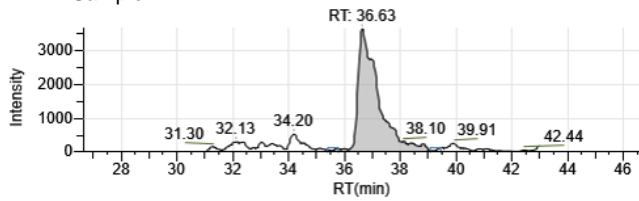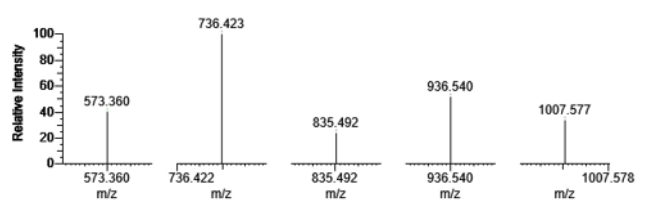

A043 MS-QBIC

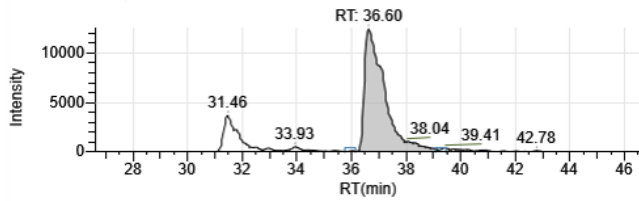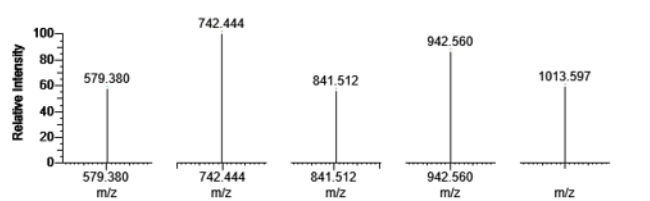

P28  
A068

Sample

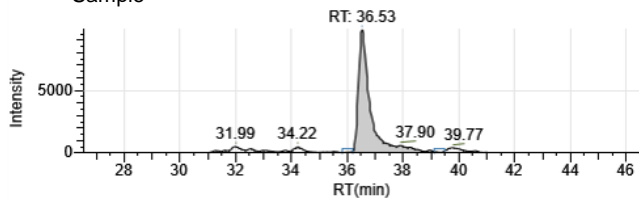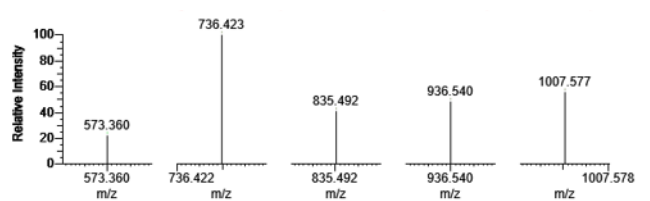

A068 MS-QBIC

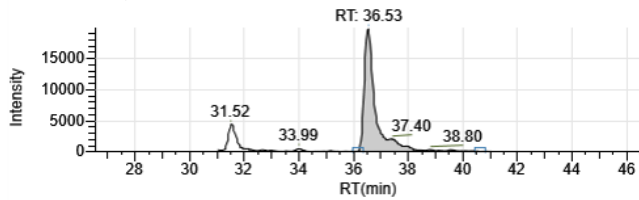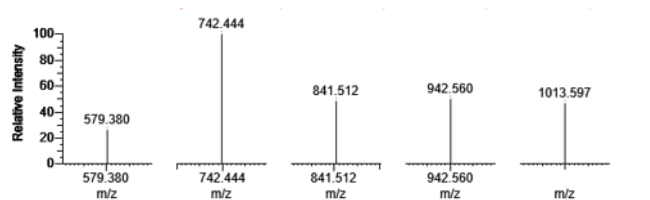

P29  
A056

Sample

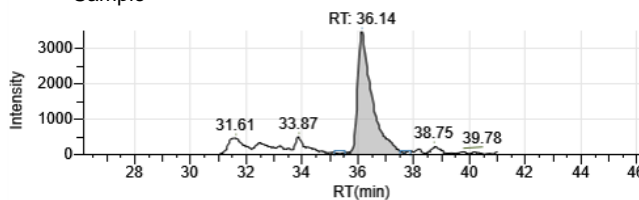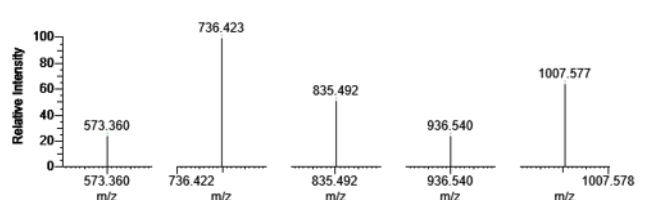

A056 MS-QBIC

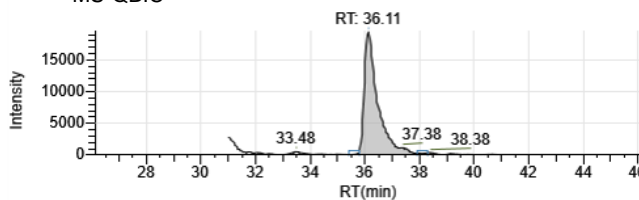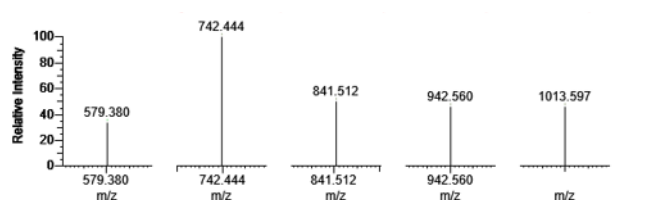

P30  
A079

Sample

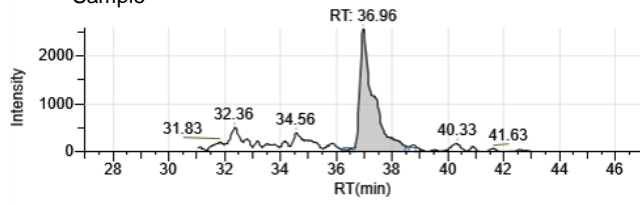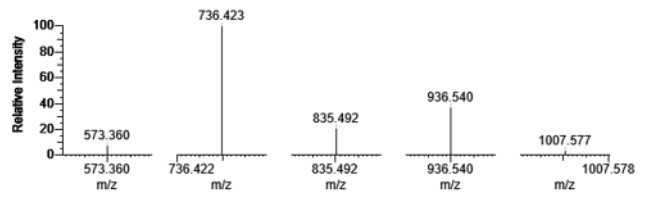

A079 MS-QBIC

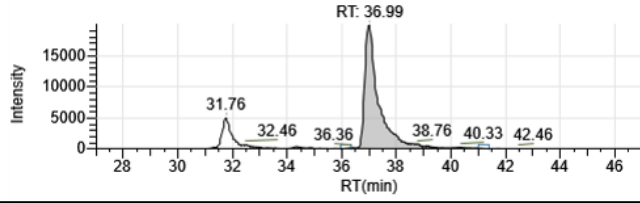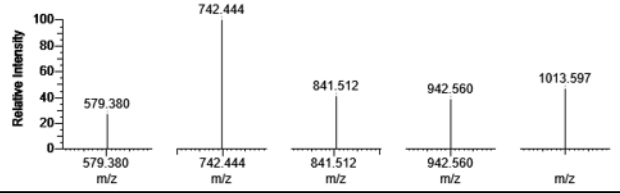

# G Apo A2 (EQLTPLIK) Heart

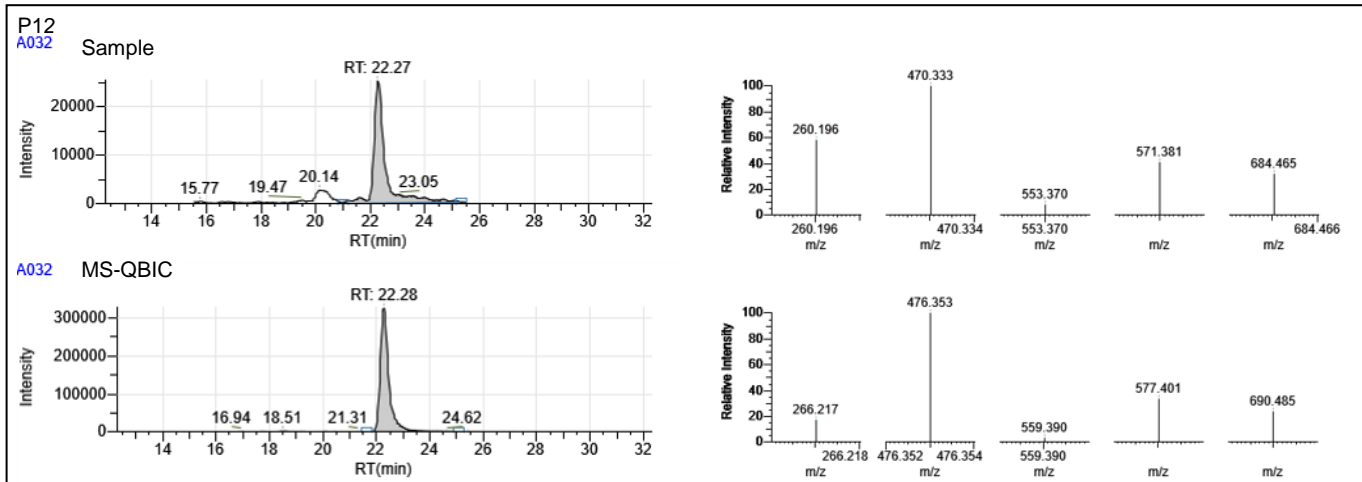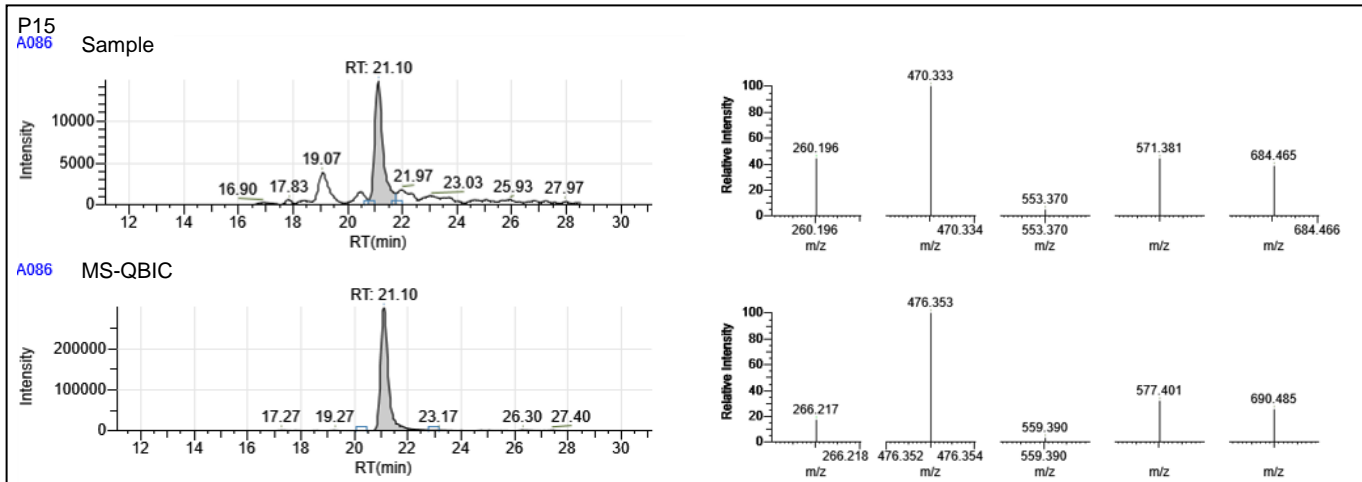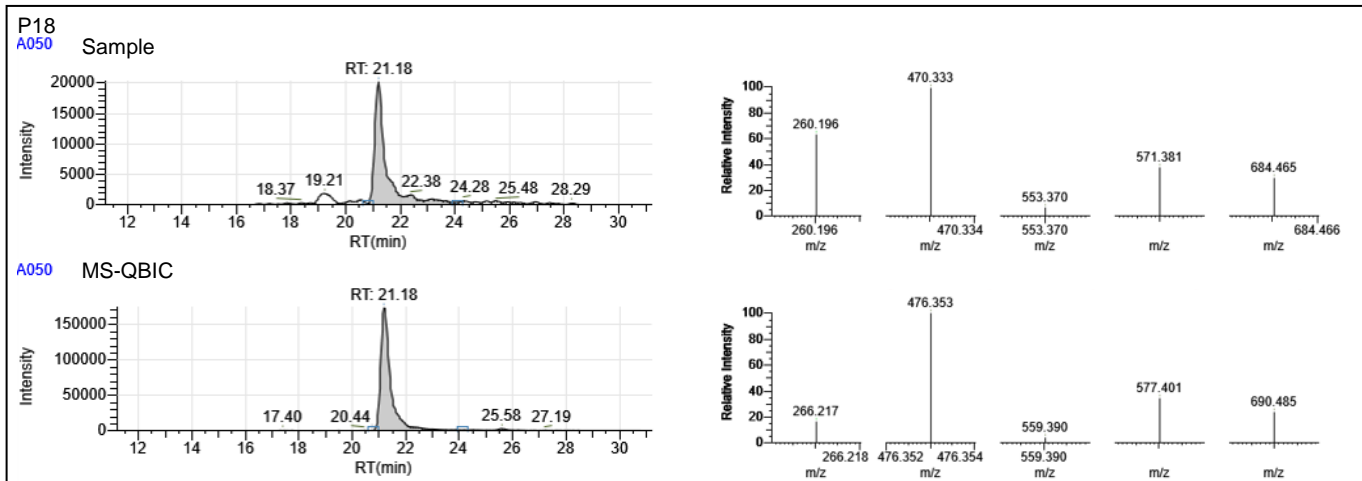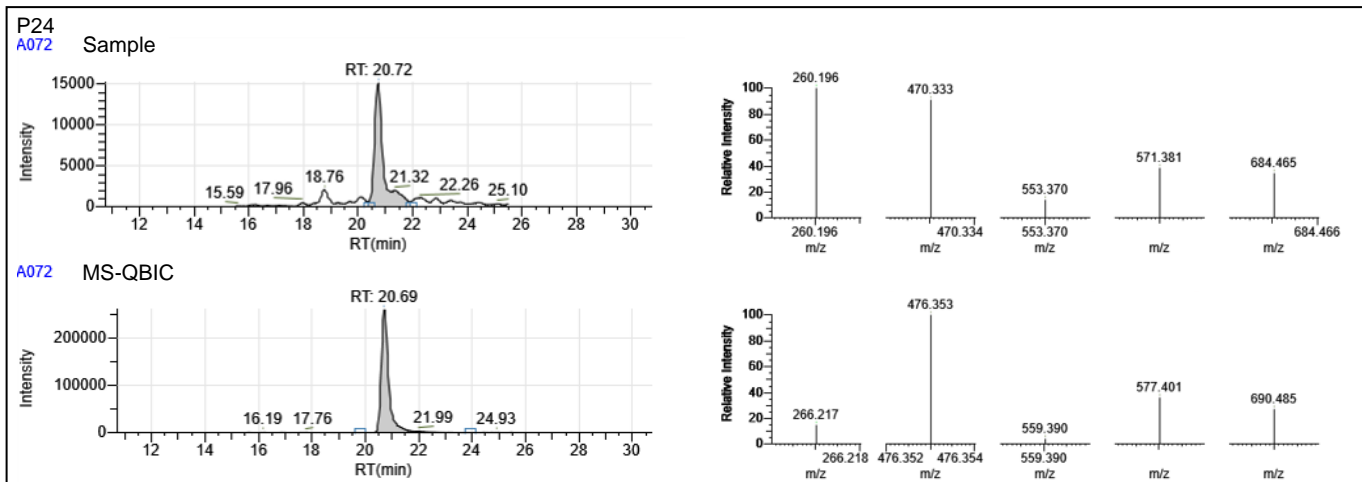

# H Apo A4 (LAPLAEDVR) Heart

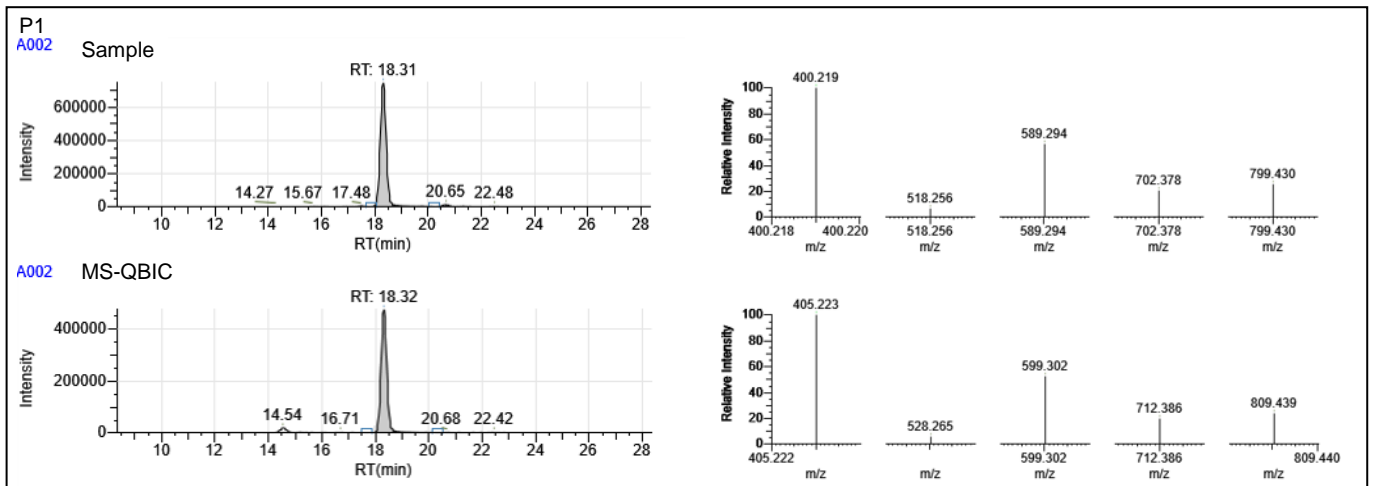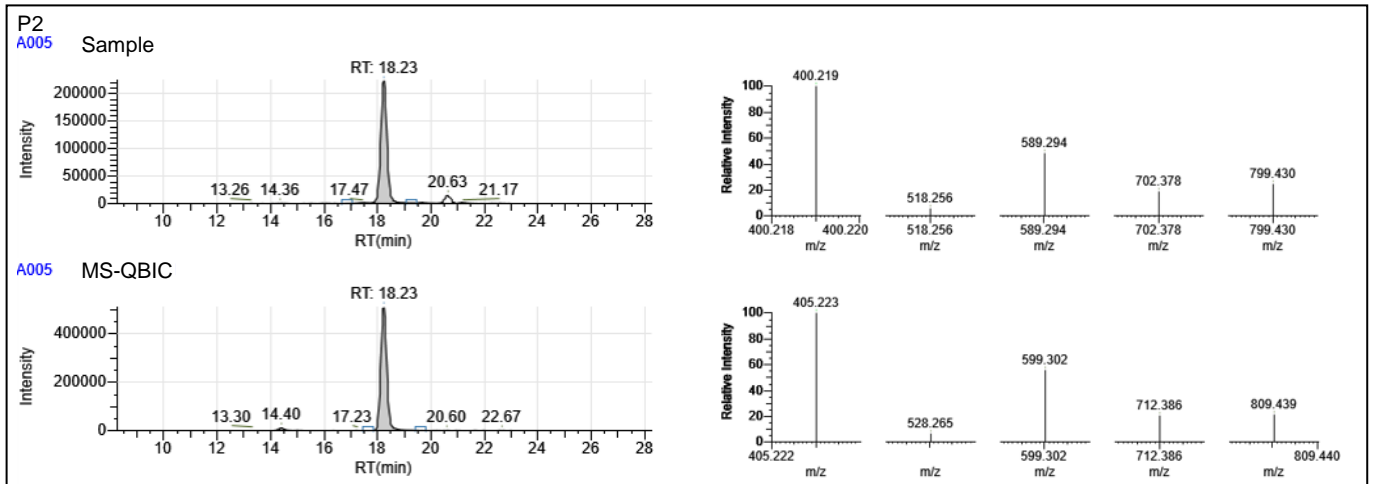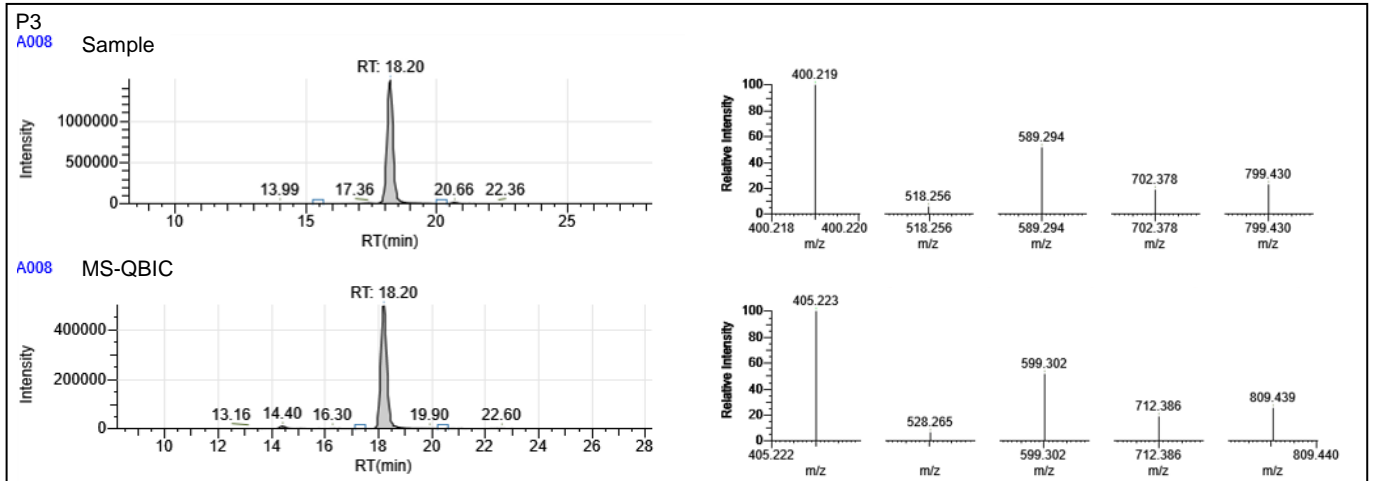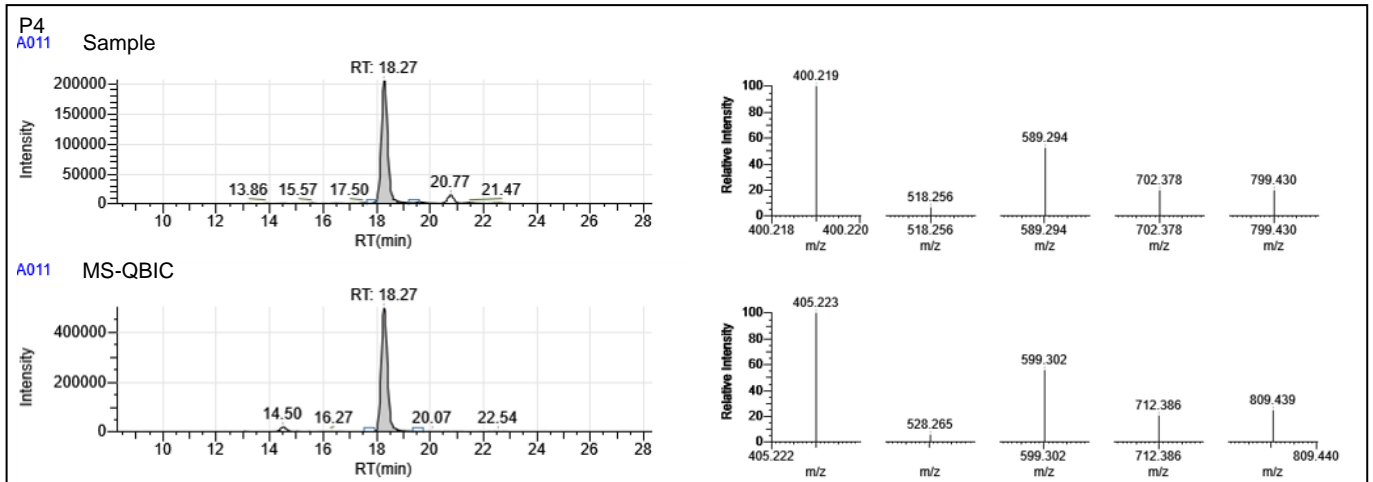



P5  
A014 Sample

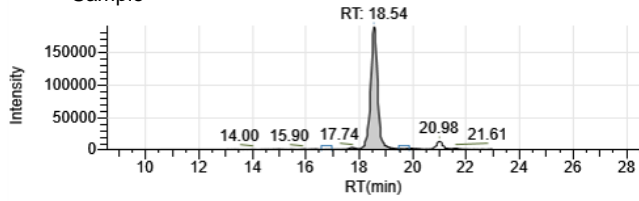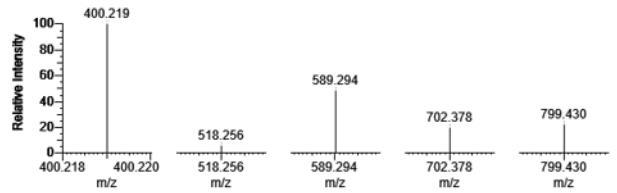

A014 MS-QBIC

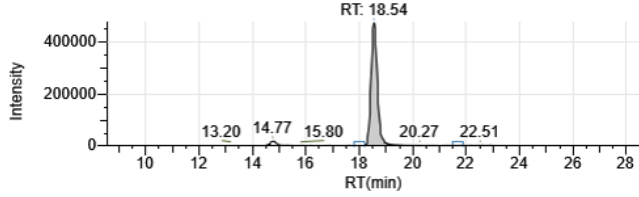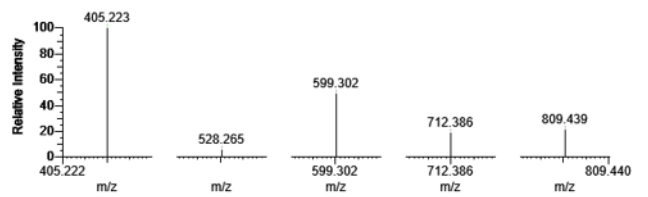

P6  
A017 Sample

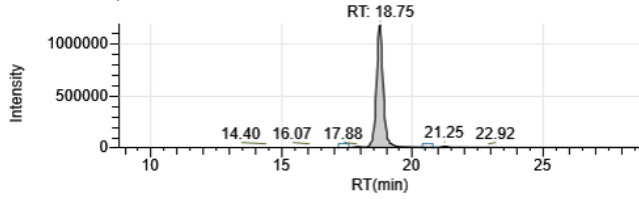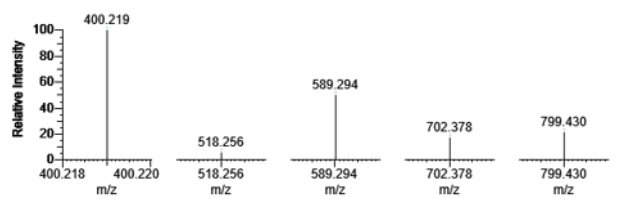

A017 MS-QBIC

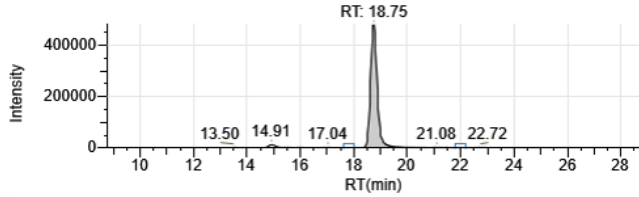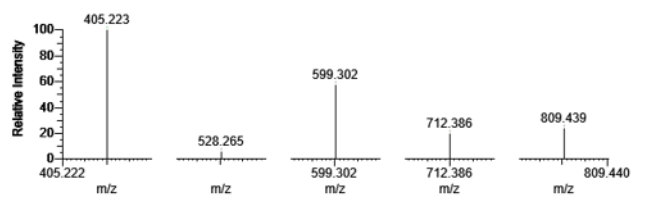

P7  
A077 Sample

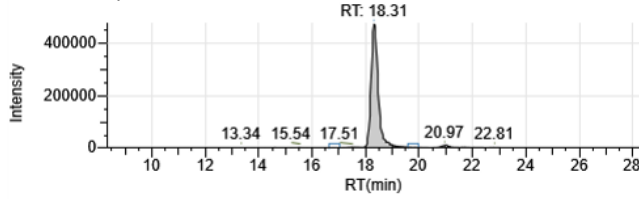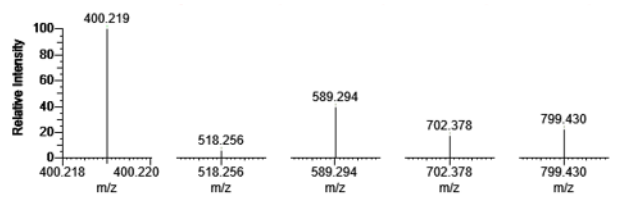

A077 MS-QBIC

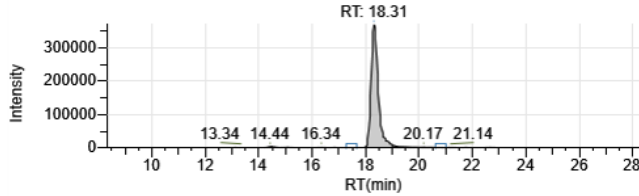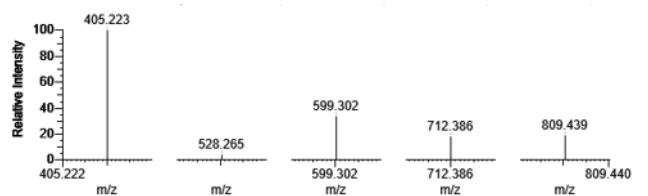

P8  
A020 Sample

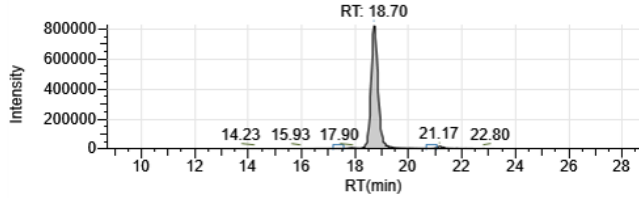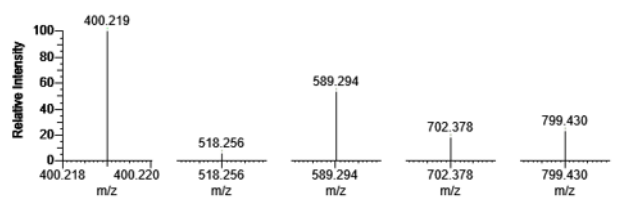

A020 MS-QBIC

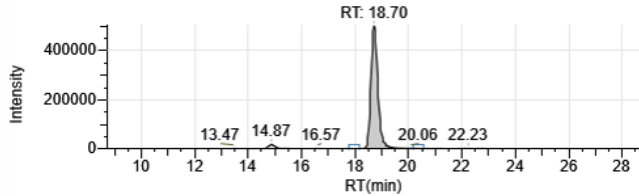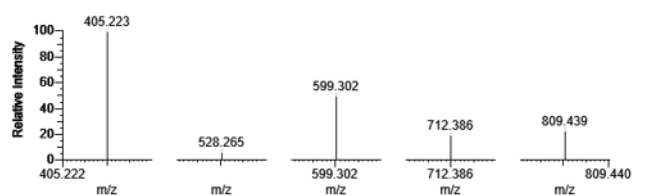

P9  
A023 Sample

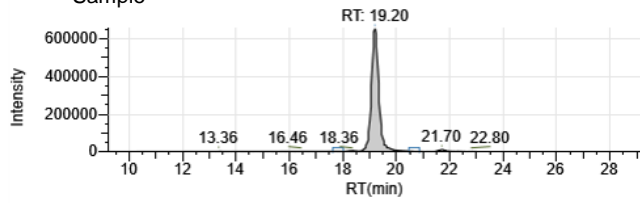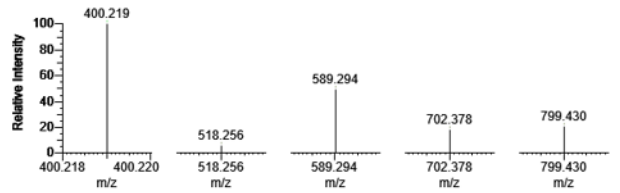

A023 MS-QBIC

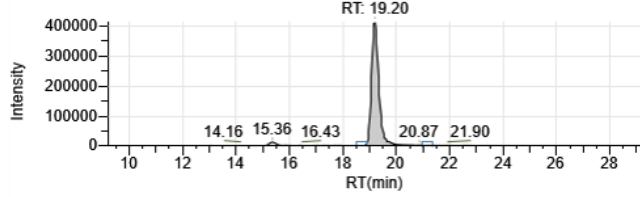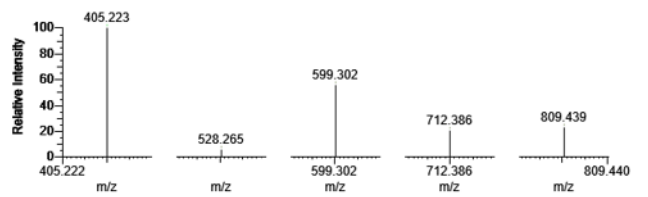

P10  
A026 Sample

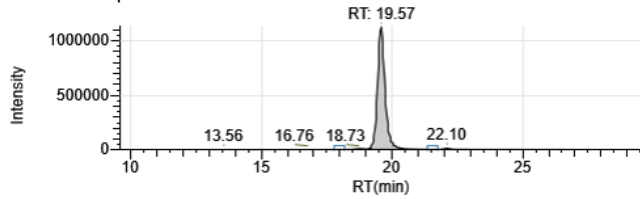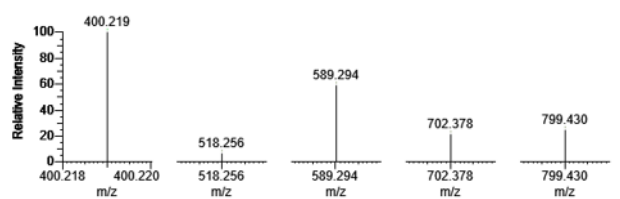

A026 MS-QBIC

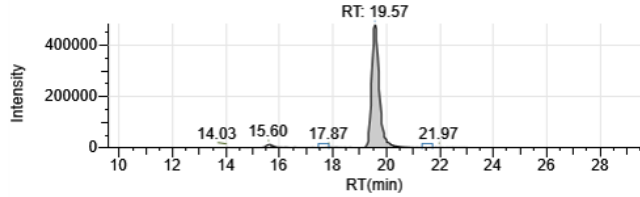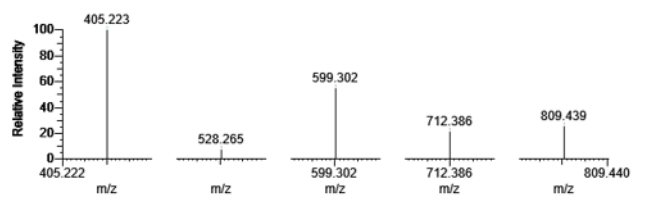

P11  
A029 Sample

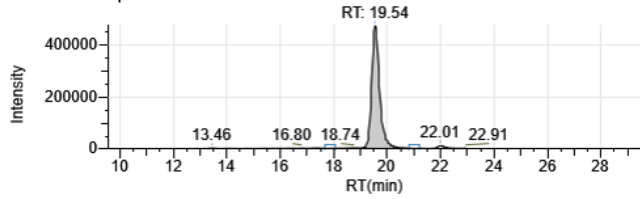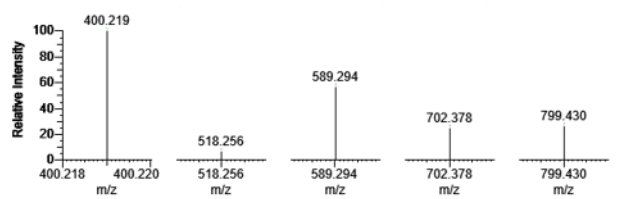

A029 MS-QBIC

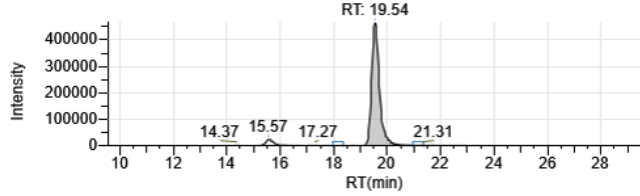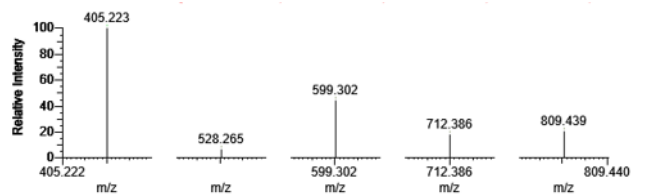

P12  
A032 Sample

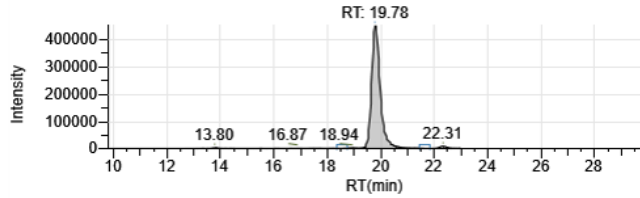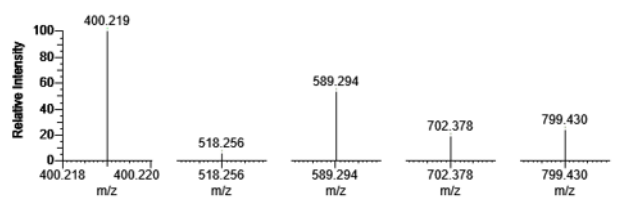

A032 MS-QBIC

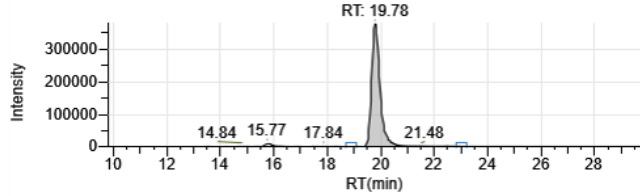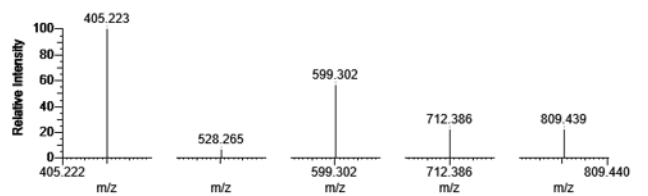

P13  
A035 Sample

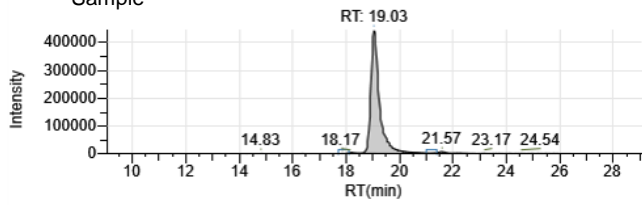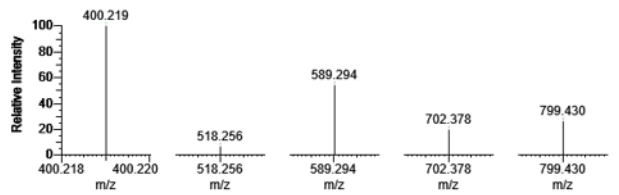

A035 MS-QBIC

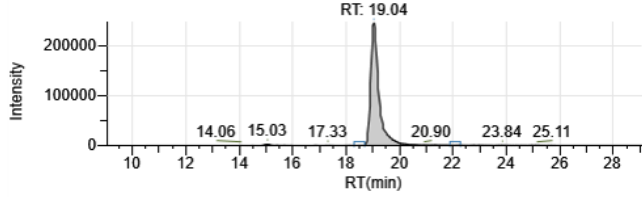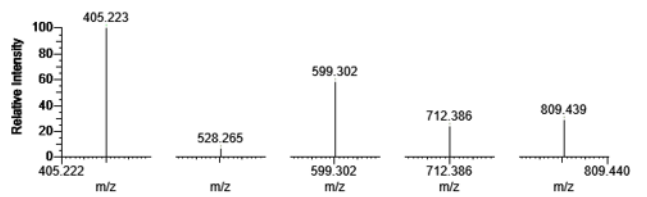

P14  
A038 Sample

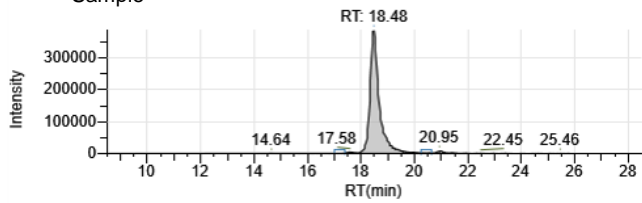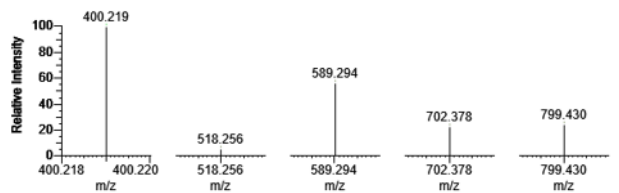

A038 MS-QBIC

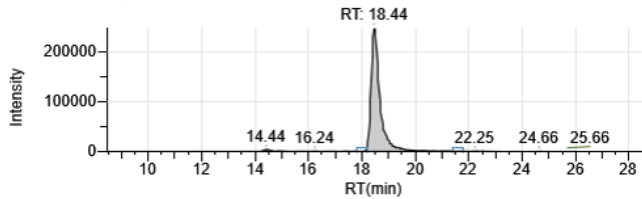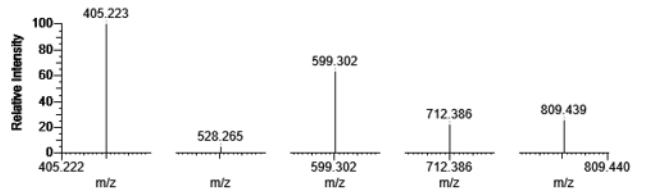

P15  
A086 Sample

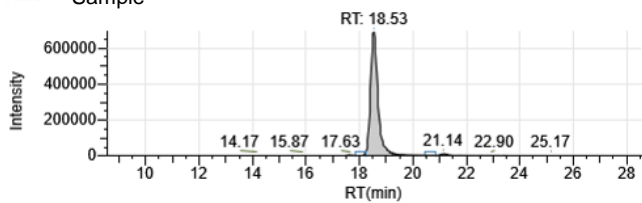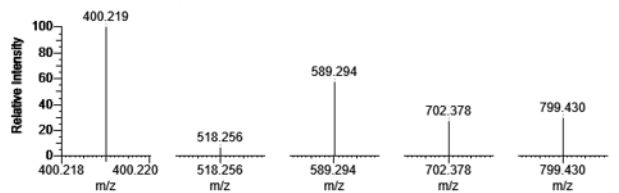

A086 MS-QBIC

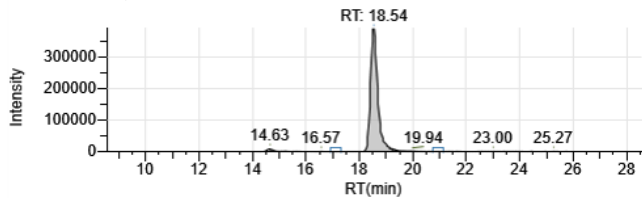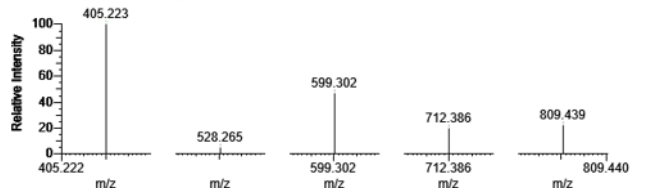

P16  
A089 Sample

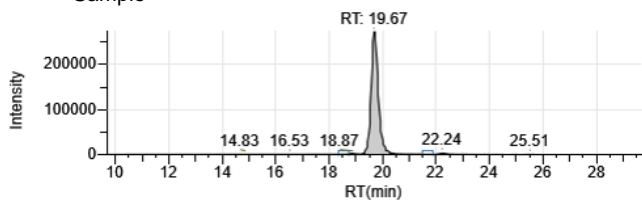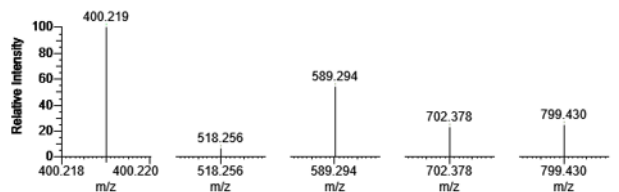

A089 MS-QBIC

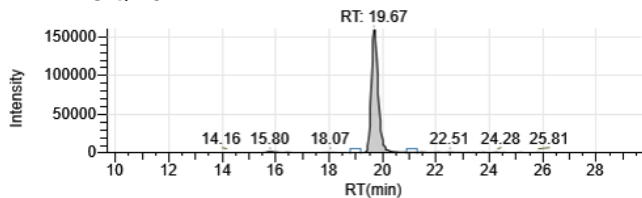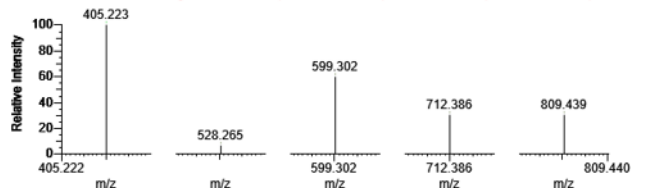

P17  
A046 Sample

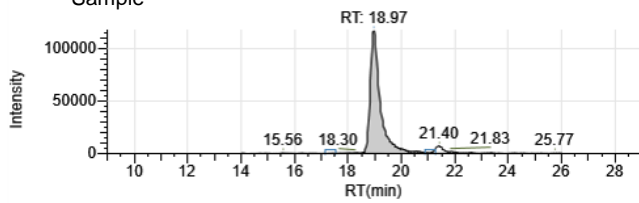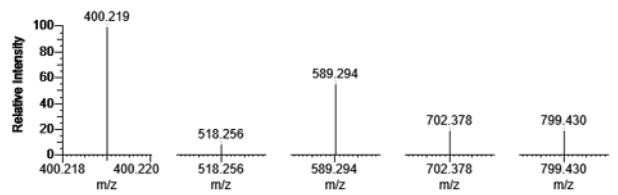

A046 MS-QBIC

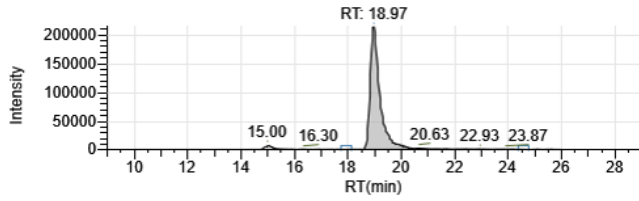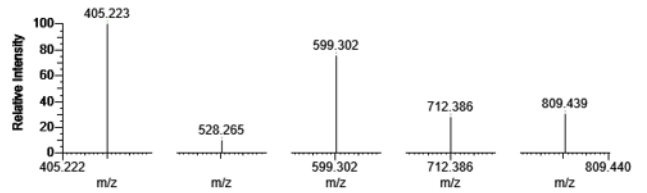

P18  
A050 Sample

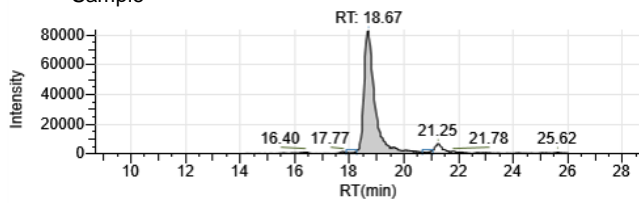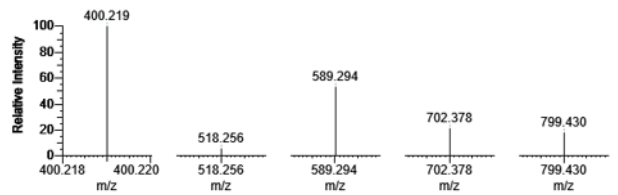

A050 MS-QBIC

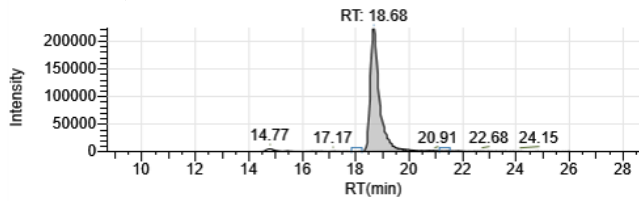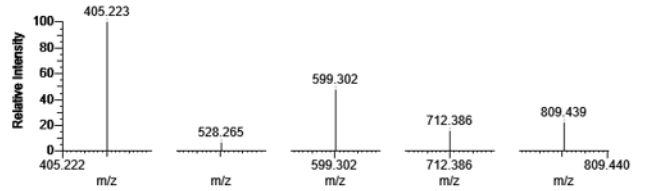

P19  
A053 Sample

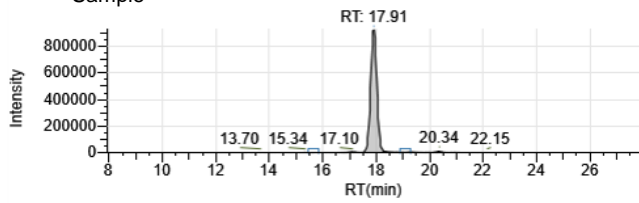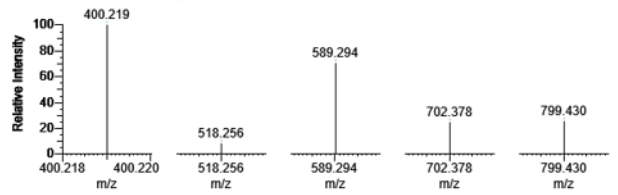

A053 MS-QBIC

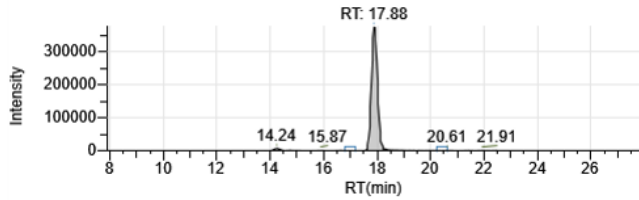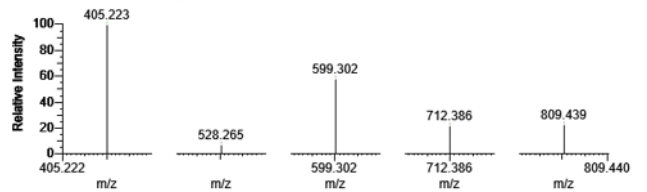

P20  
A062 Sample

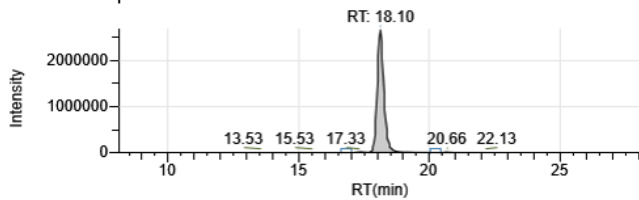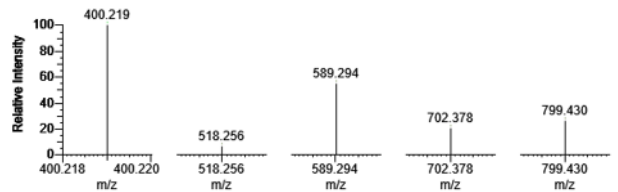

A062 MS-QBIC

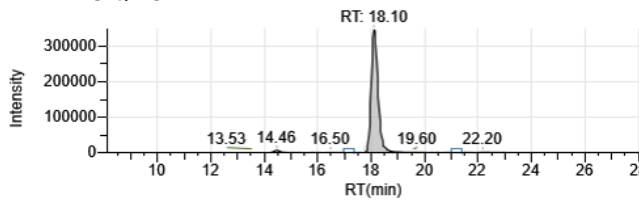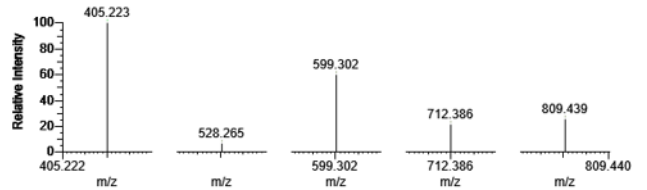

P21  
A064 Sample

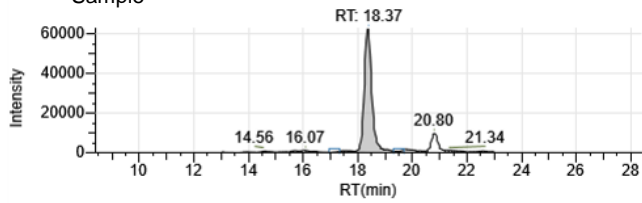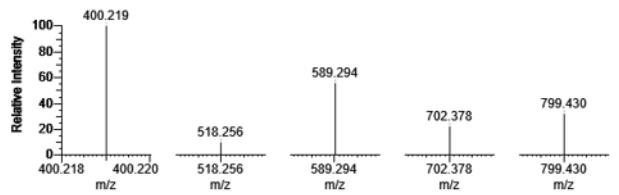

A064 MS-QBIC

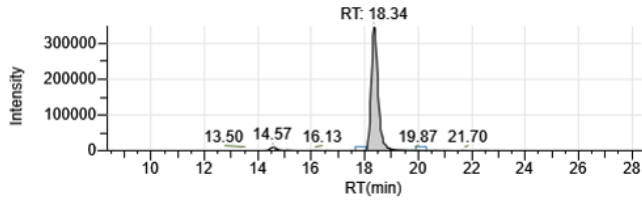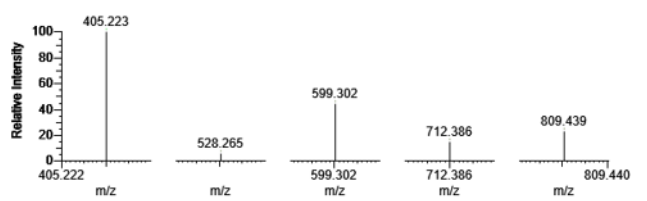

P22  
A041 Sample

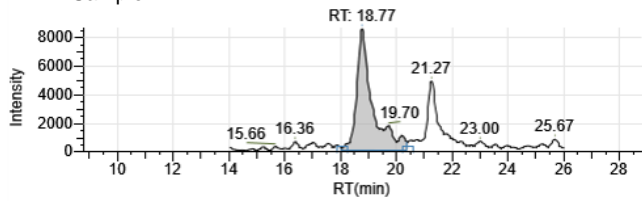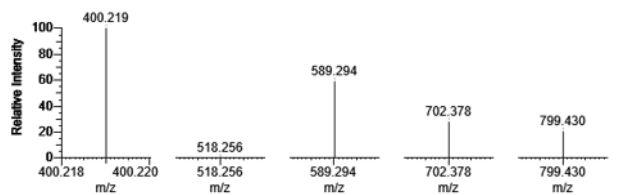

A041 MS-QBIC

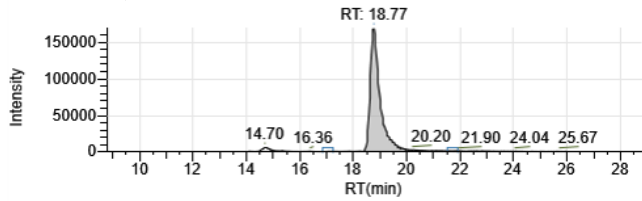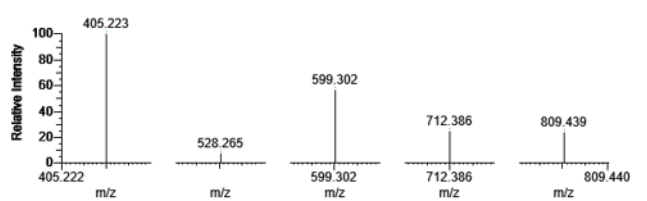

P23  
A083 Sample

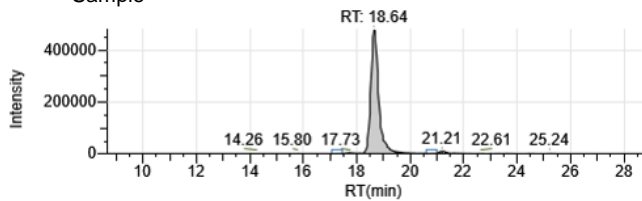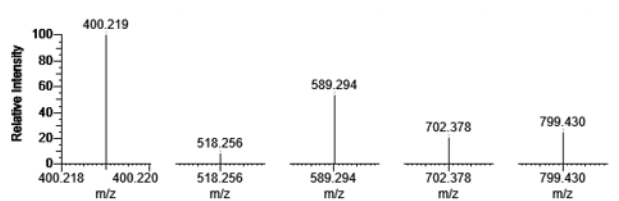

A083 MS-QBIC

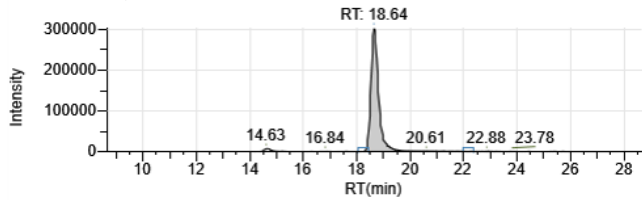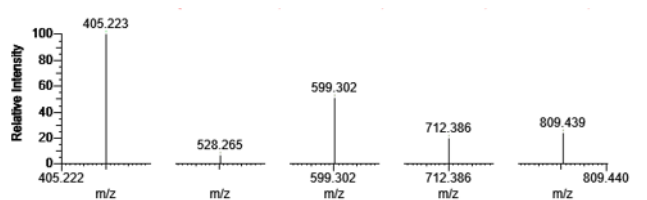

P26  
A071 Sample

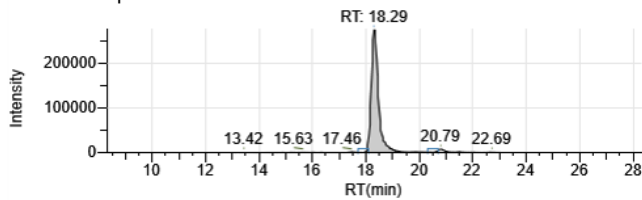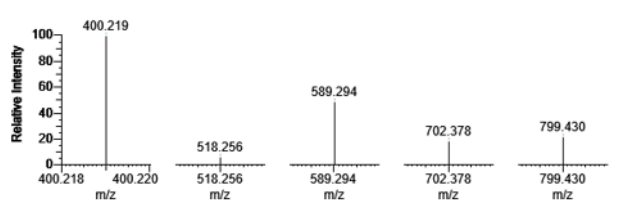

A071 MS-QBIC

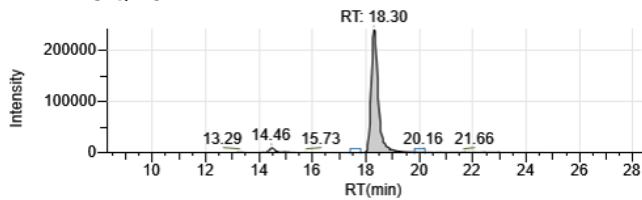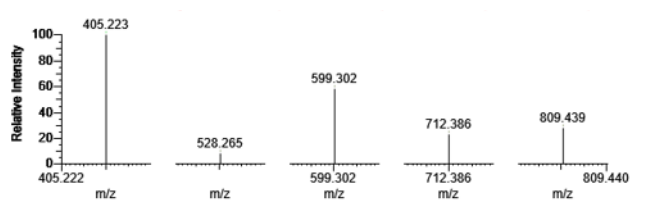

P25  
A074

Sample

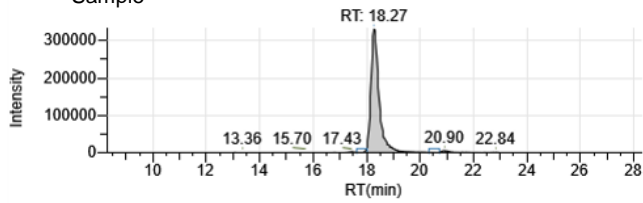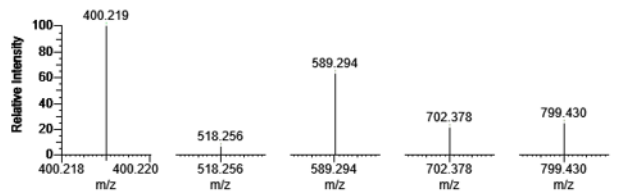

A074 MS-QBIC

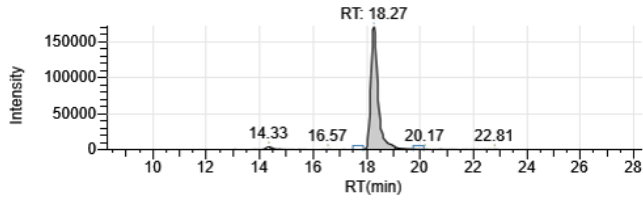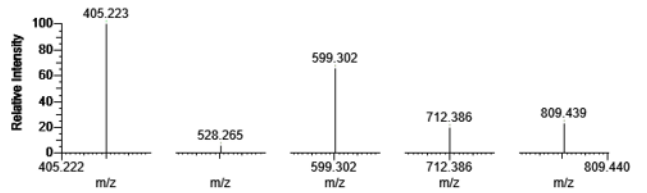

P26

A043

Sample

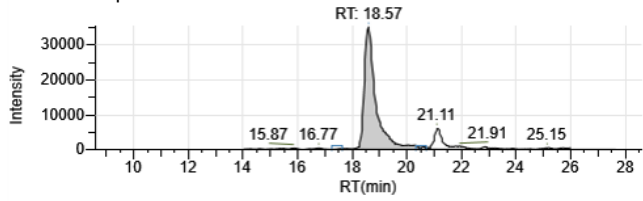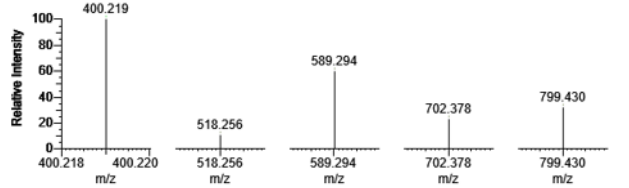

A043 MS-QBIC

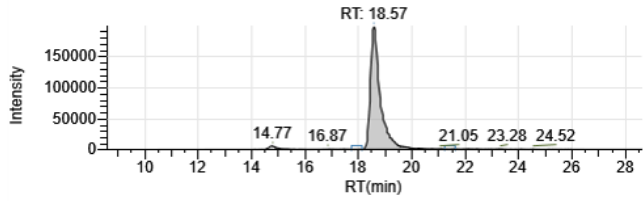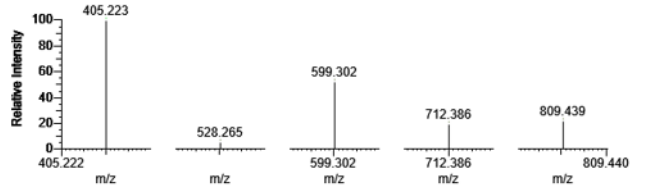

P27

A059

Sample

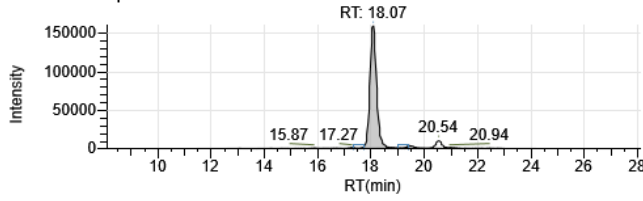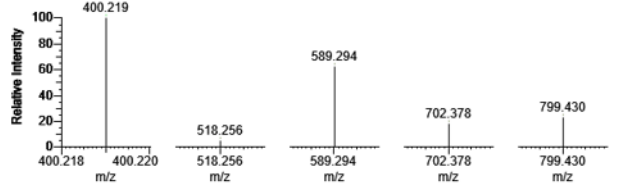

A059 MS-QBIC

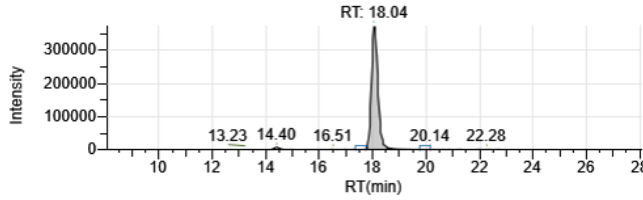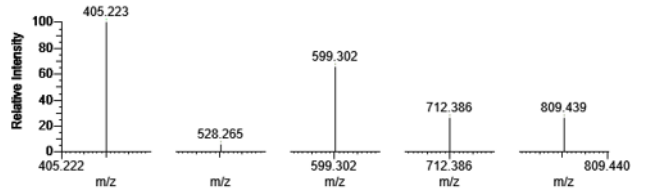

P28

A068

Sample

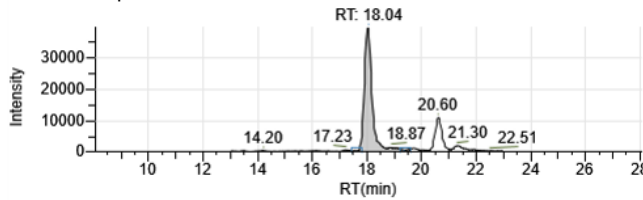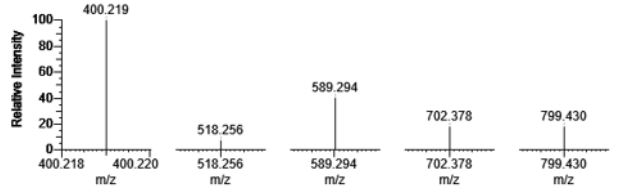

A068 MS-QBIC

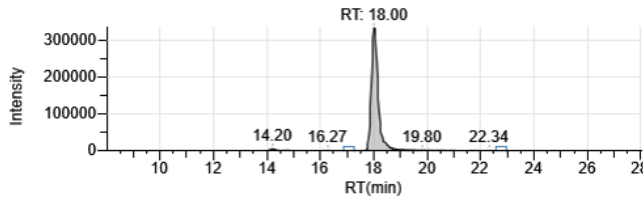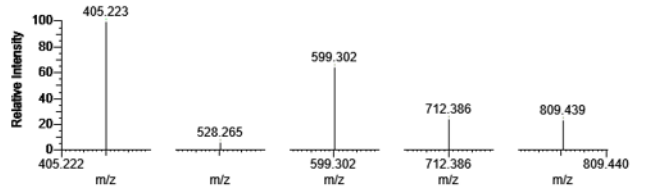

P29  
A056

Sample

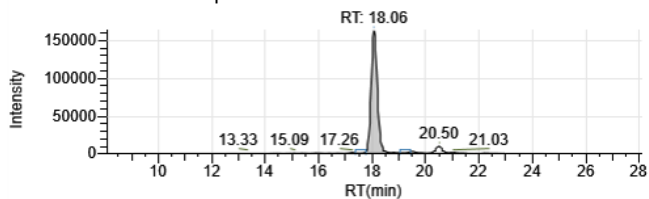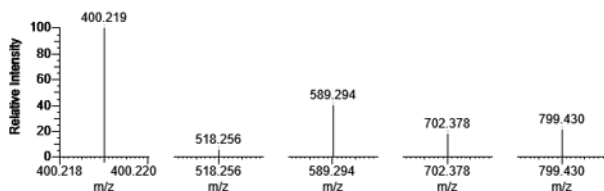

A056

MS-QBIC

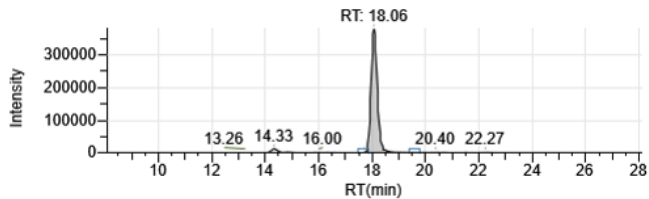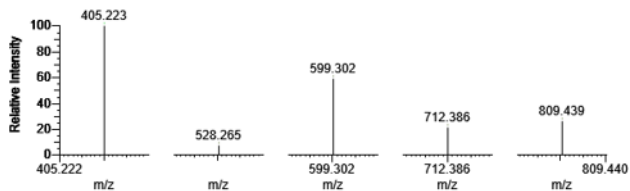

P30  
A080

Sample

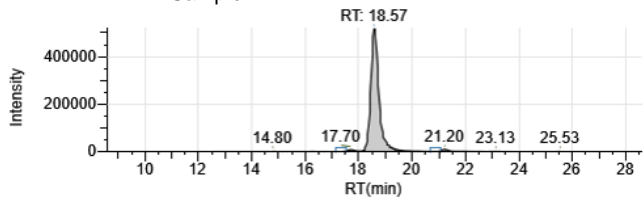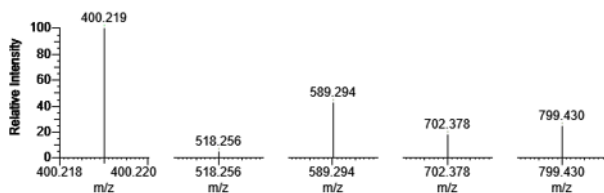

A080

MS-QBIC

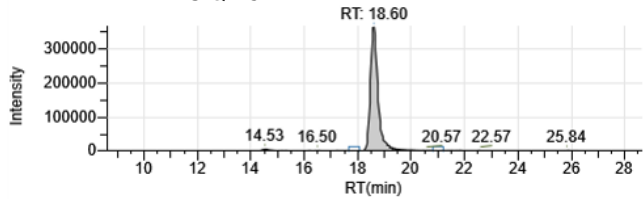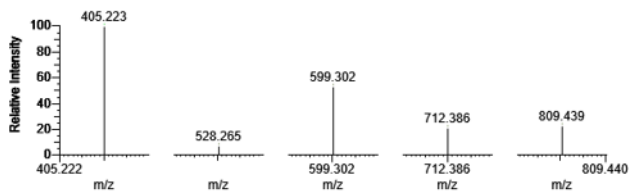



# I Apo E (LGPLVEQGR) Heart

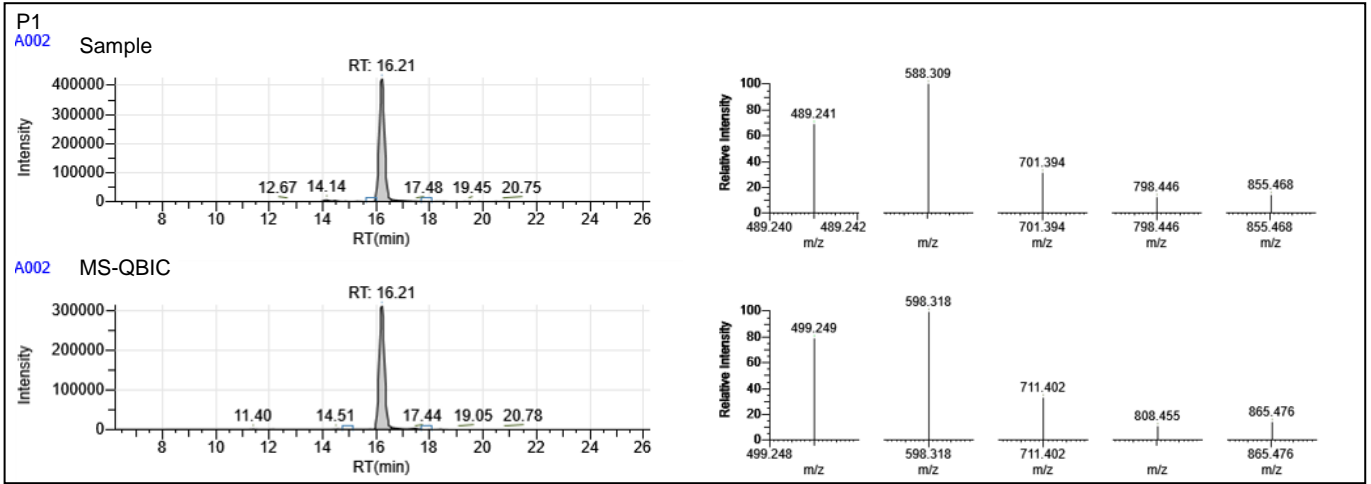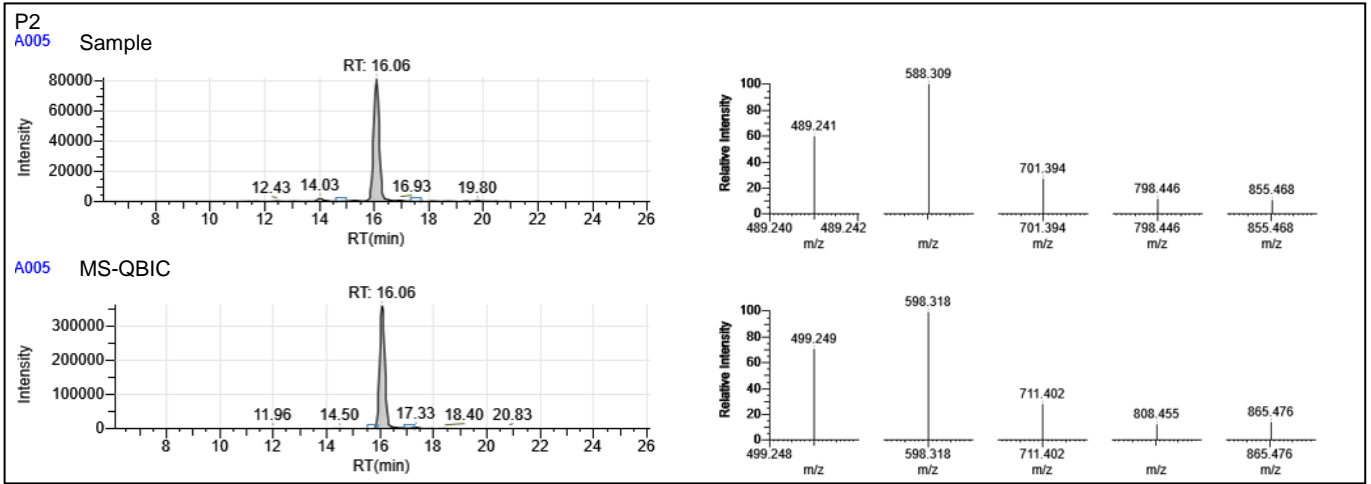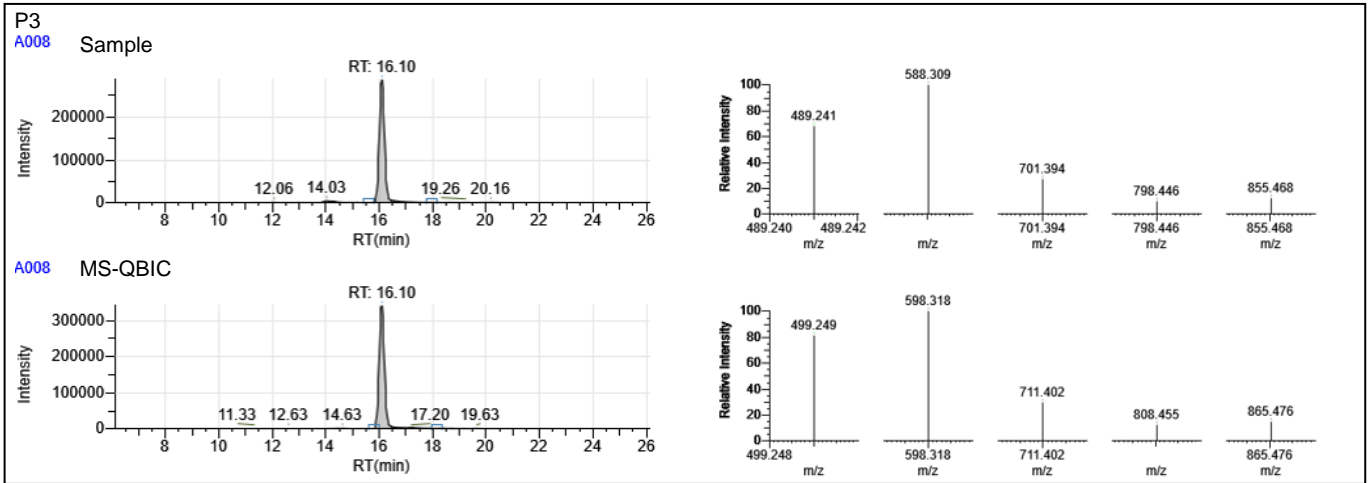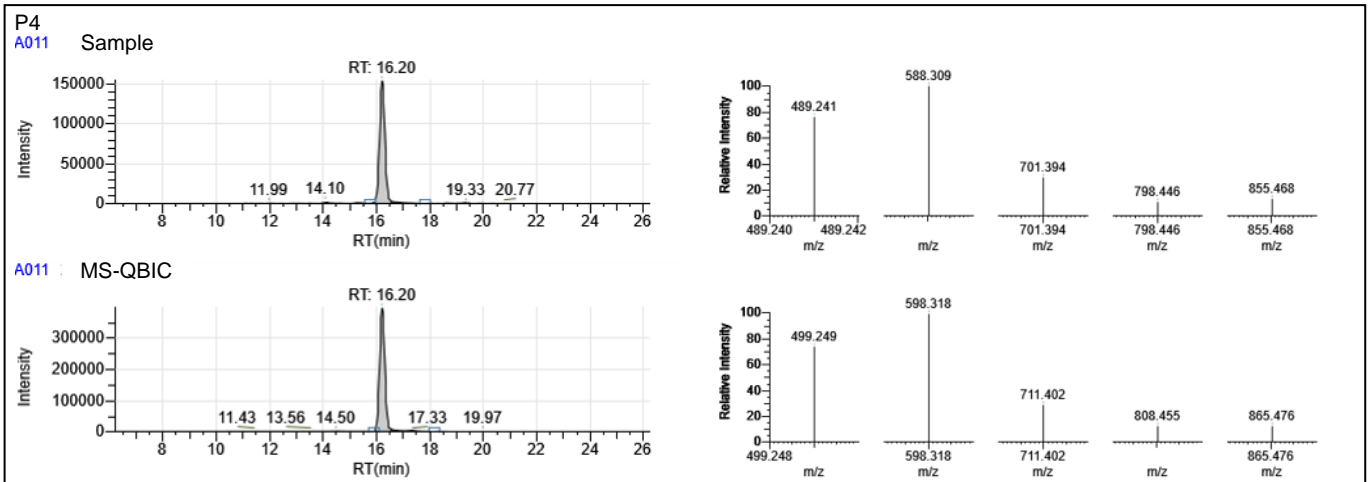

P5  
A014 Sample

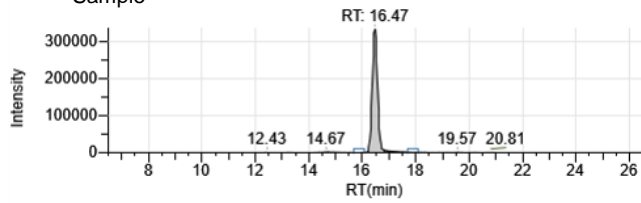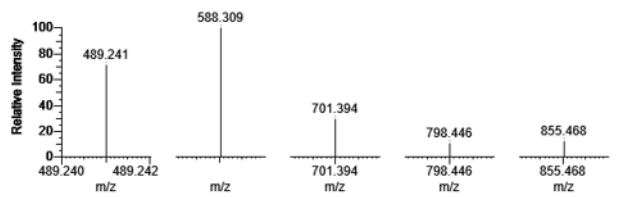

A014 MS-QBIC

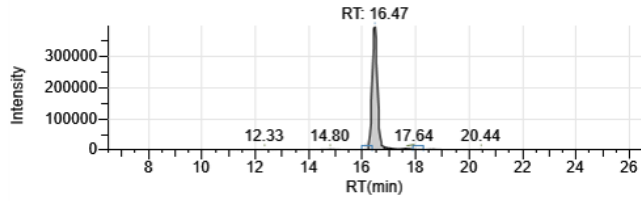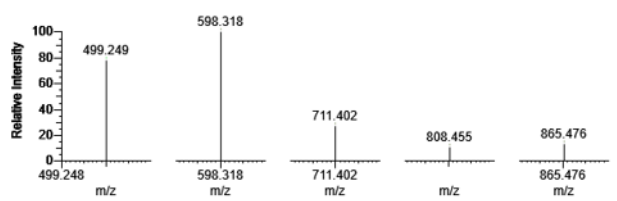

P6  
A017 Sample

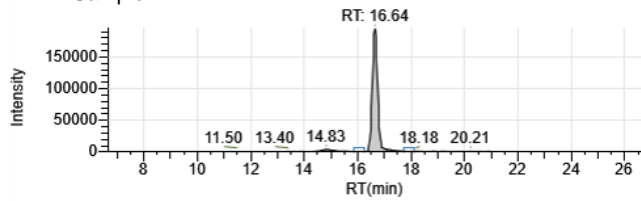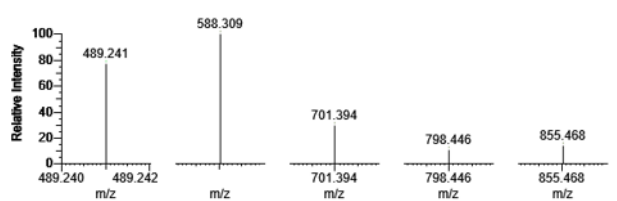

A017 MS-QBIC

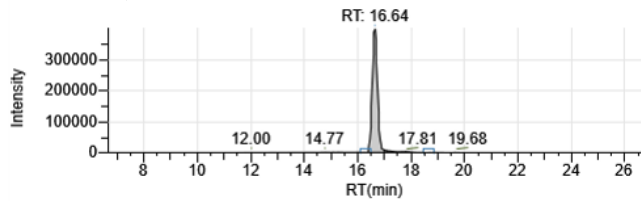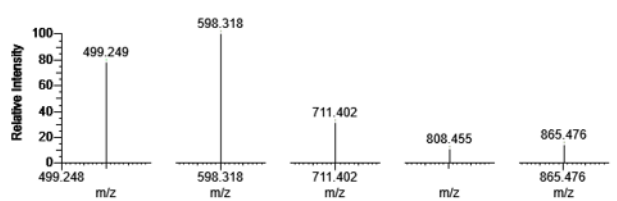

P7  
A077 Sample

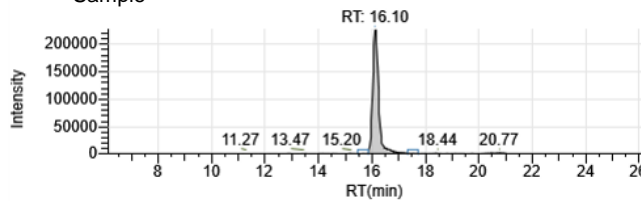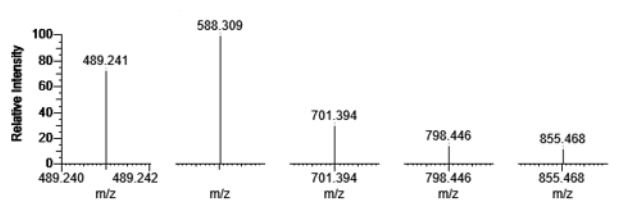

A077 MS-QBIC

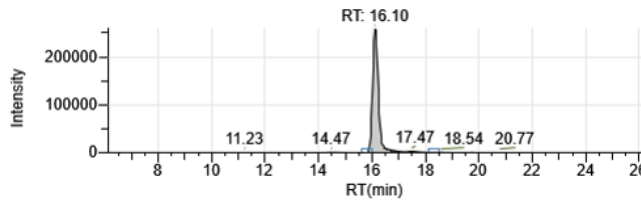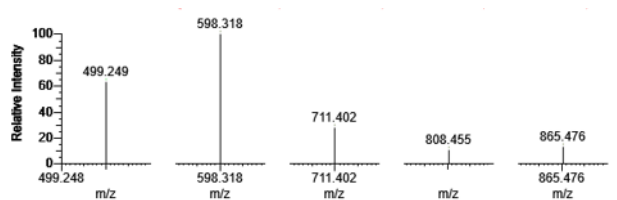

P8  
A020 Sample

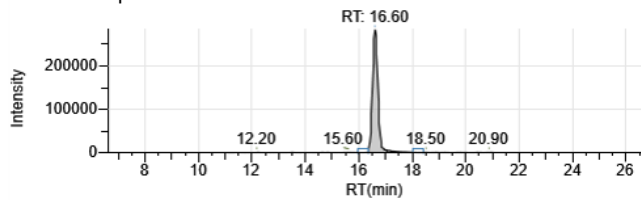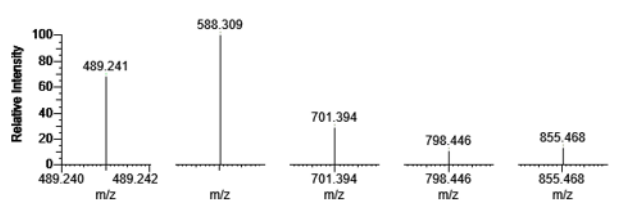

A020 MS-QBIC

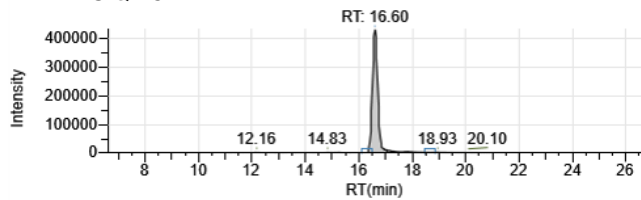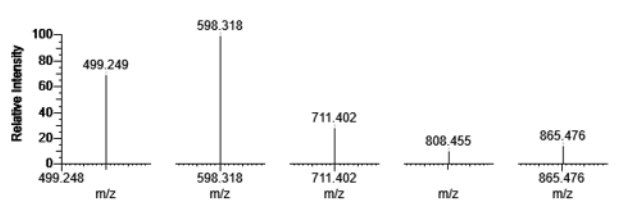

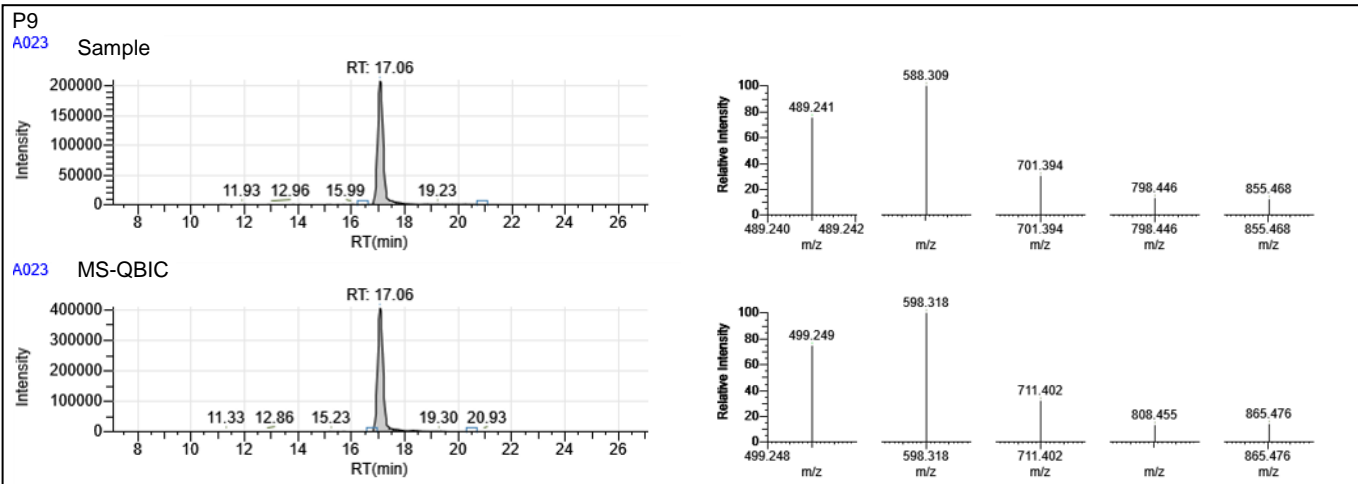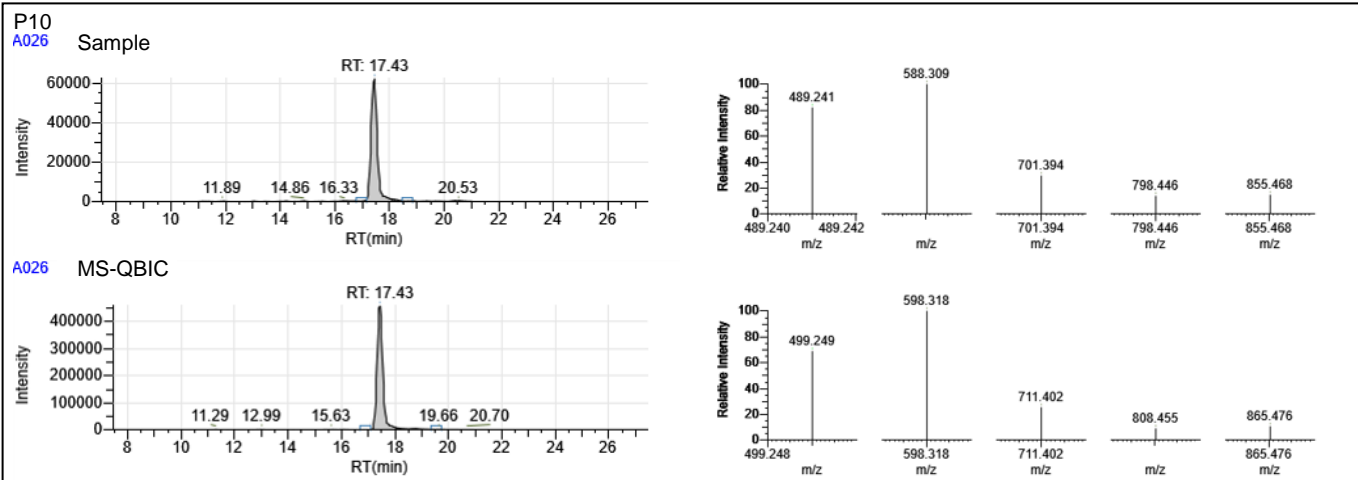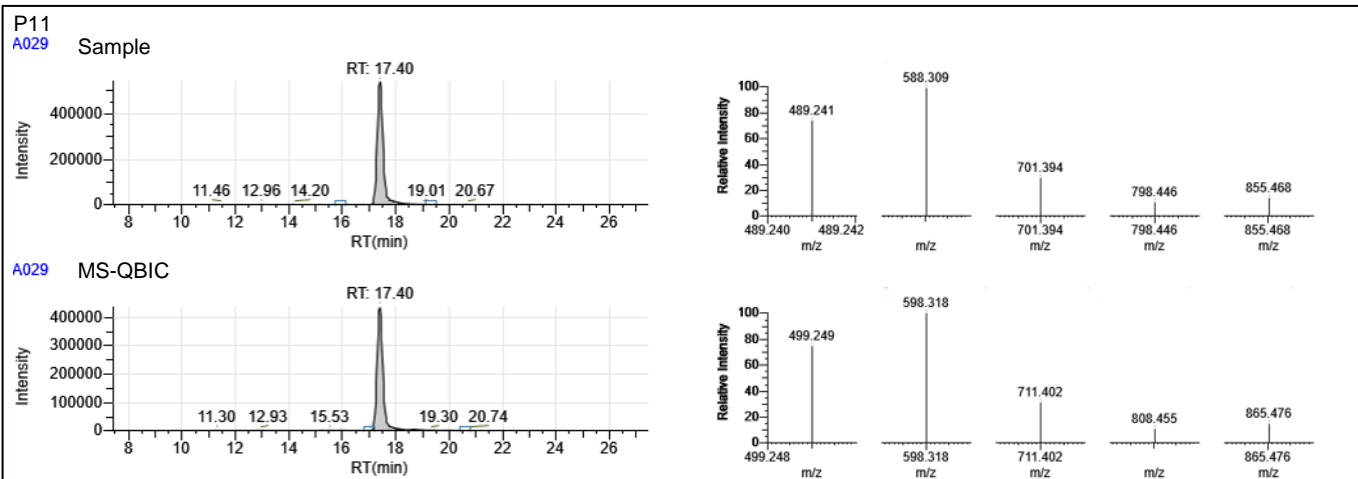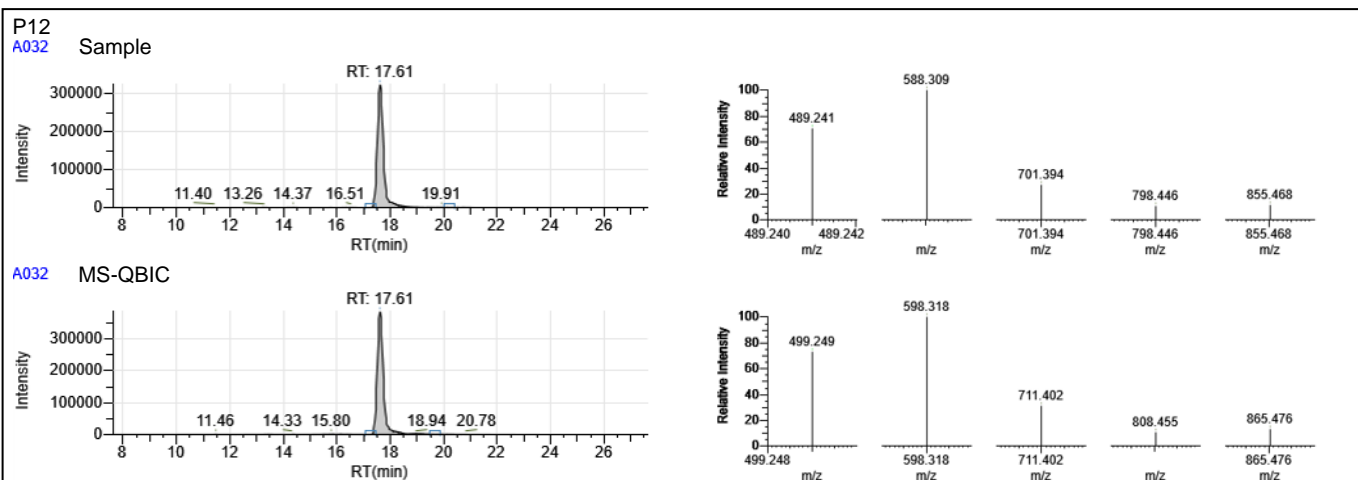

P13  
A035 Sample

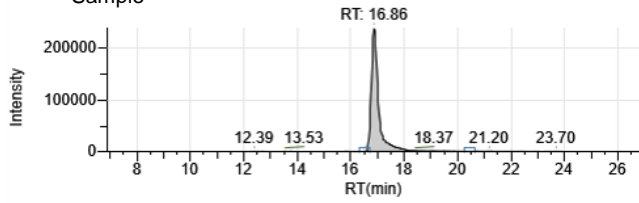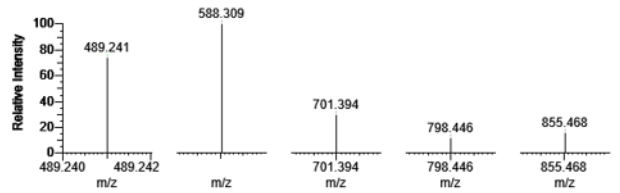

A035 MS-QBIC

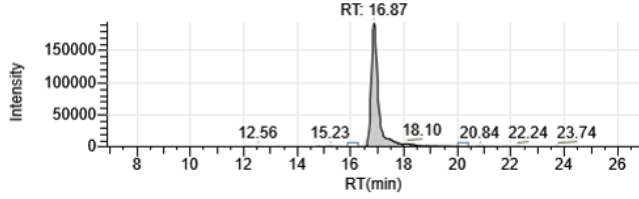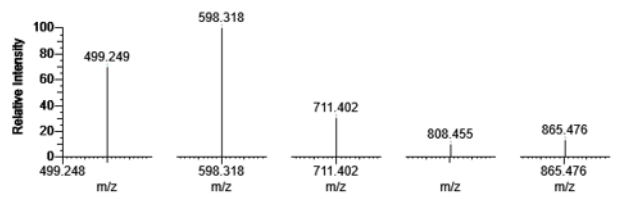

P14  
A038 Sample

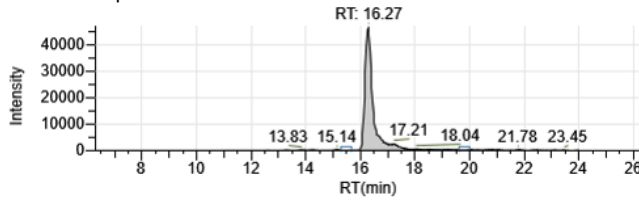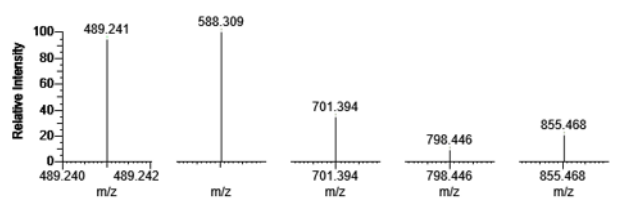

A038 MS-QBIC

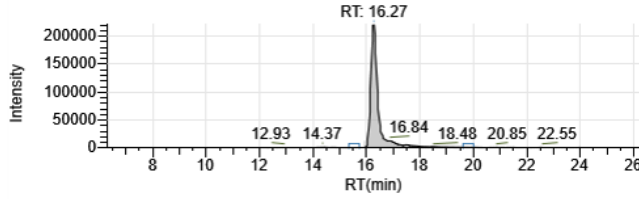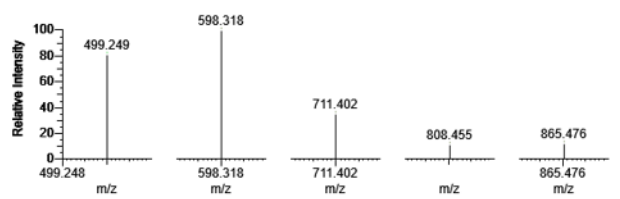

P15  
A086 Sample

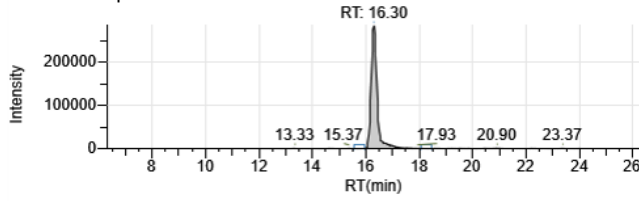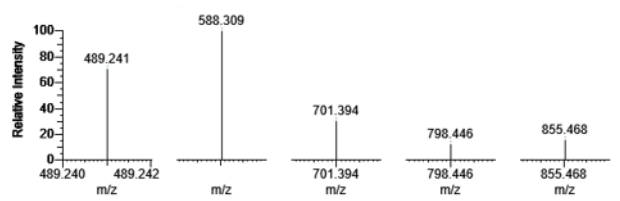

A086 MS-QBIC

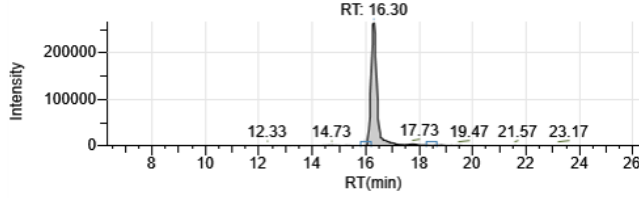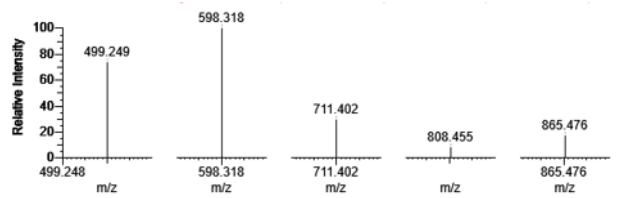

P16  
A089 Sample

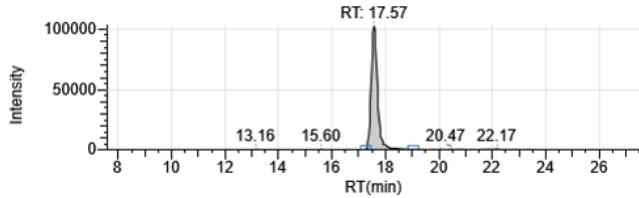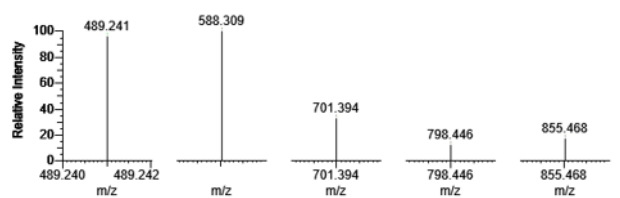

A089 MS-QBIC

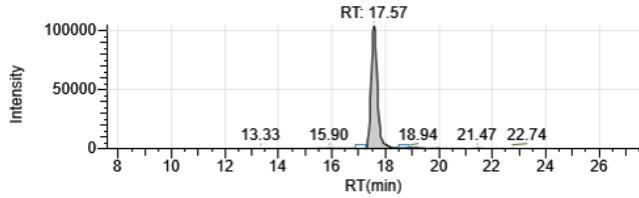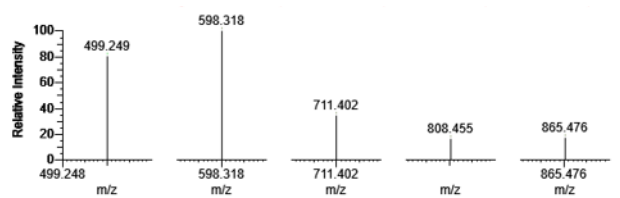

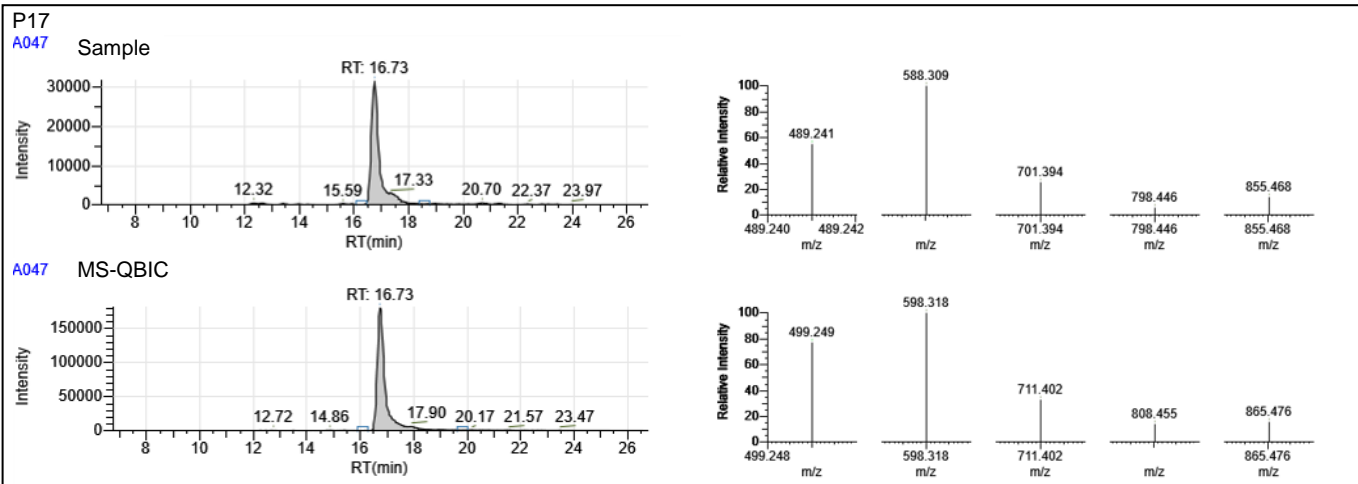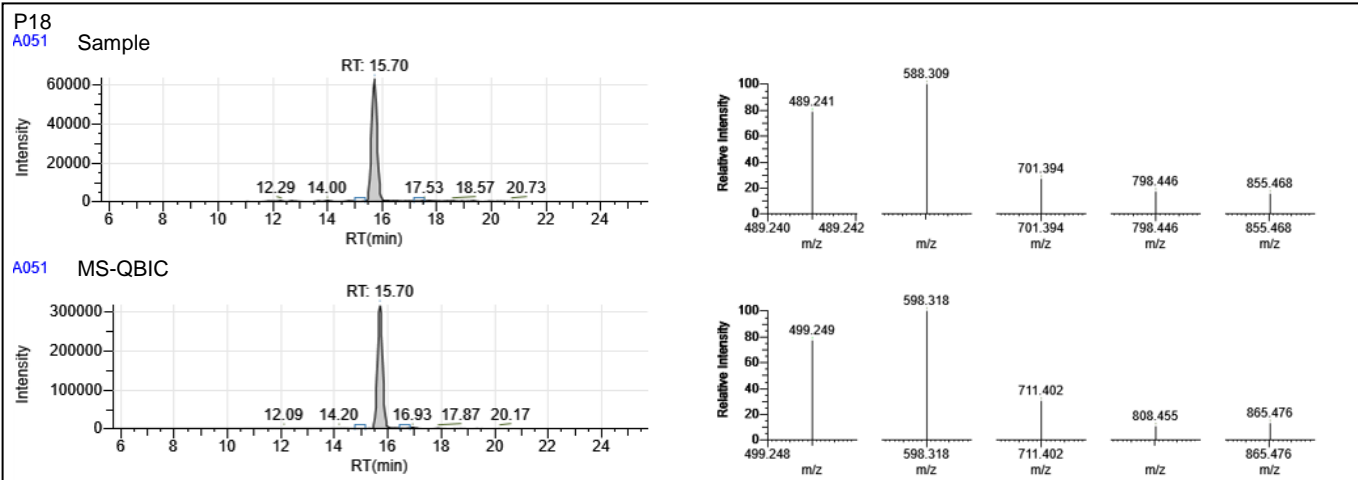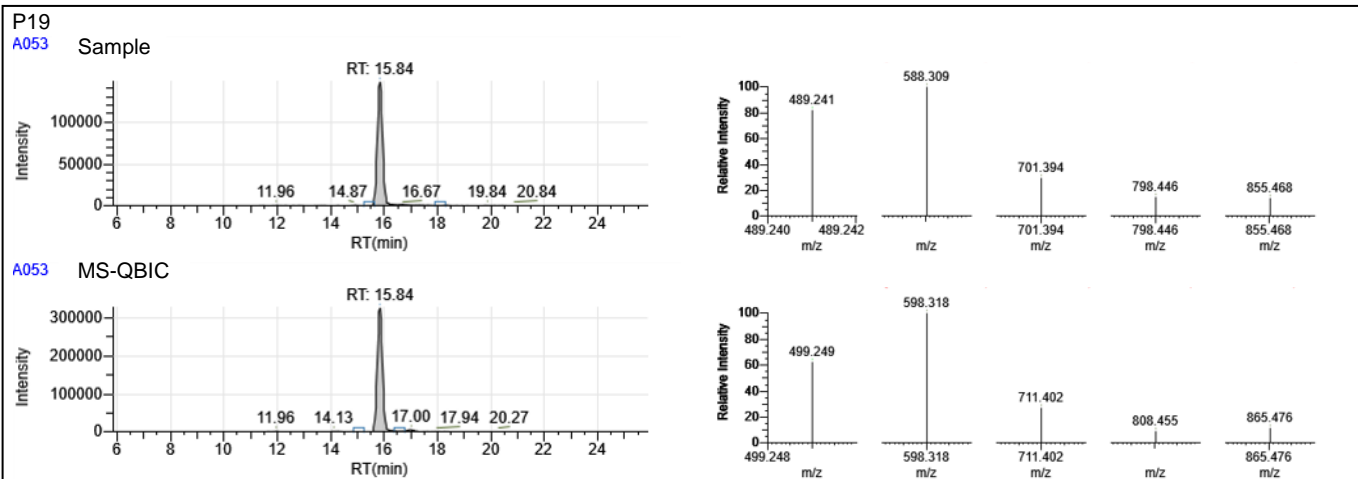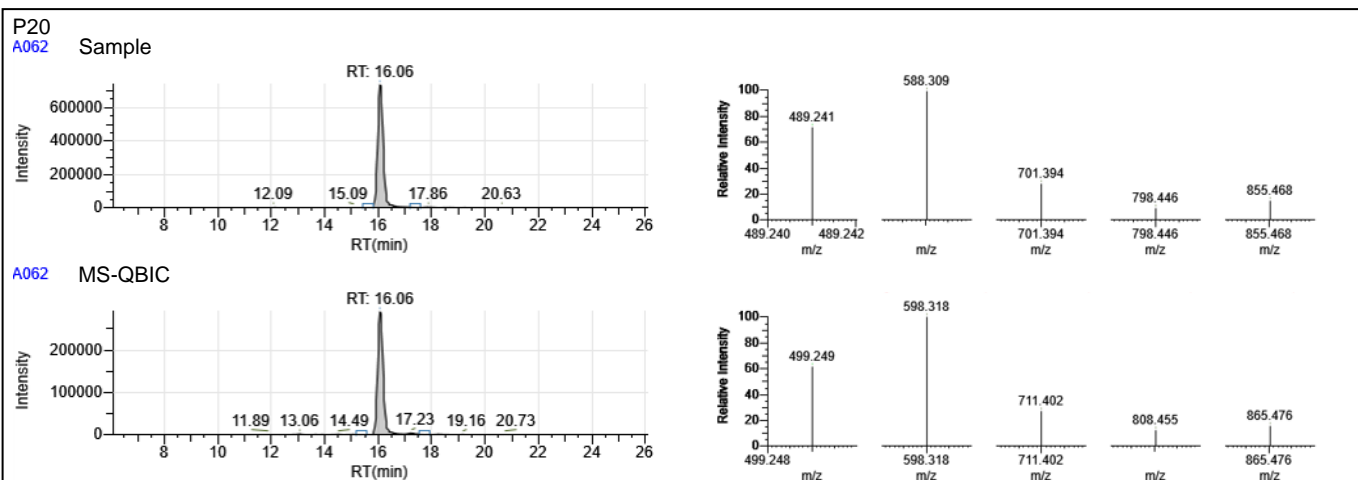

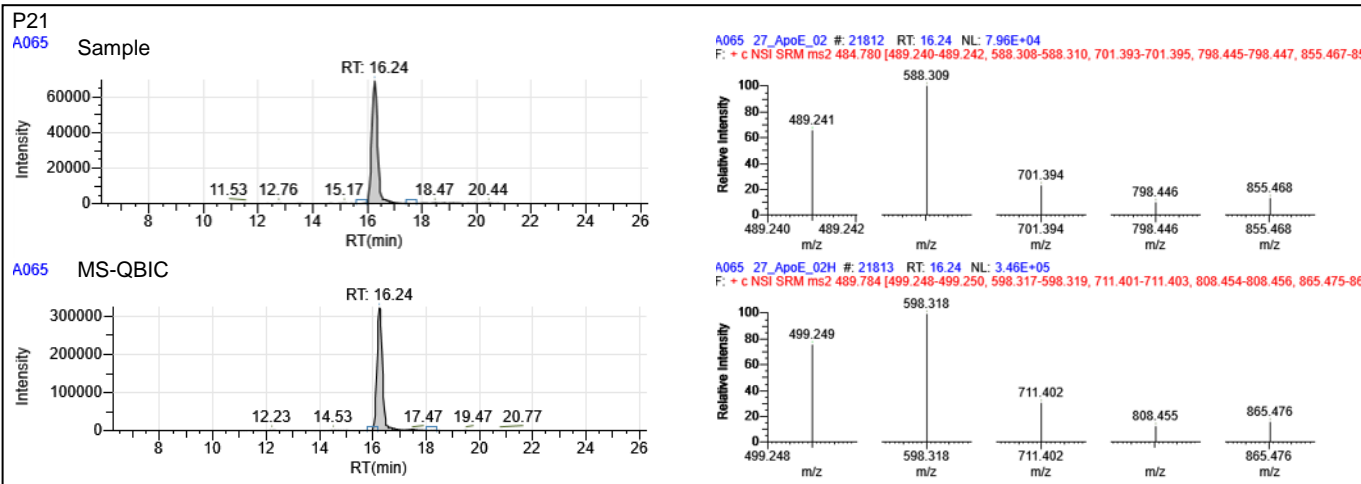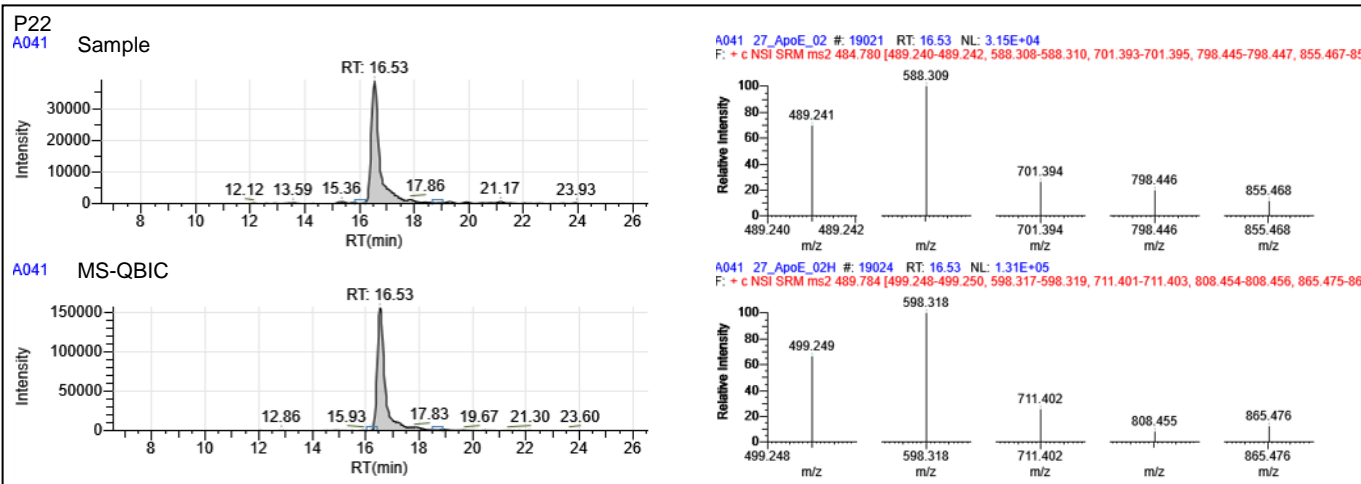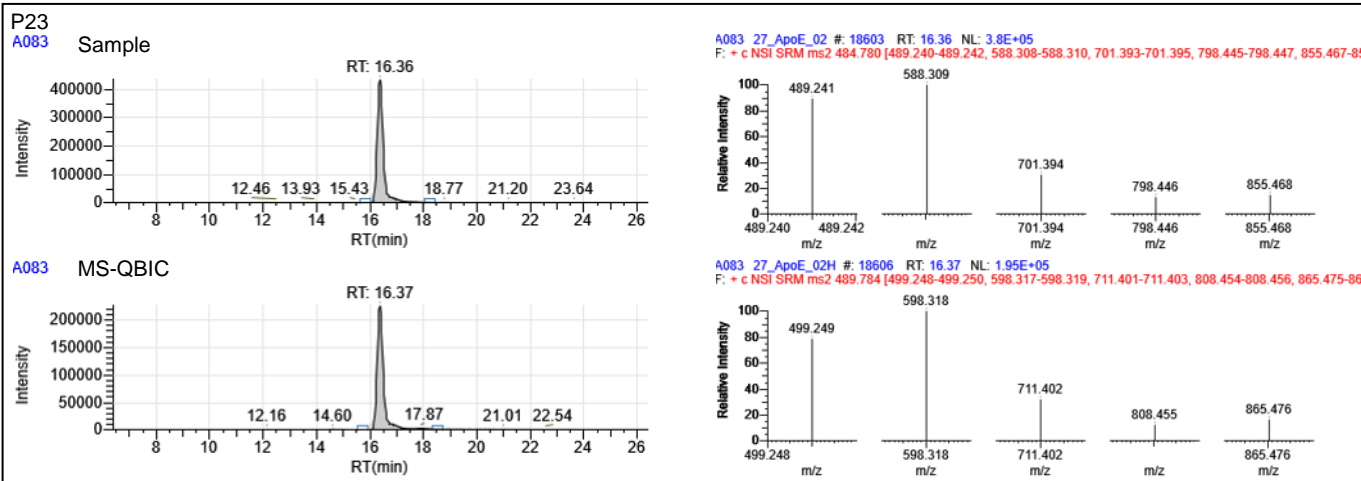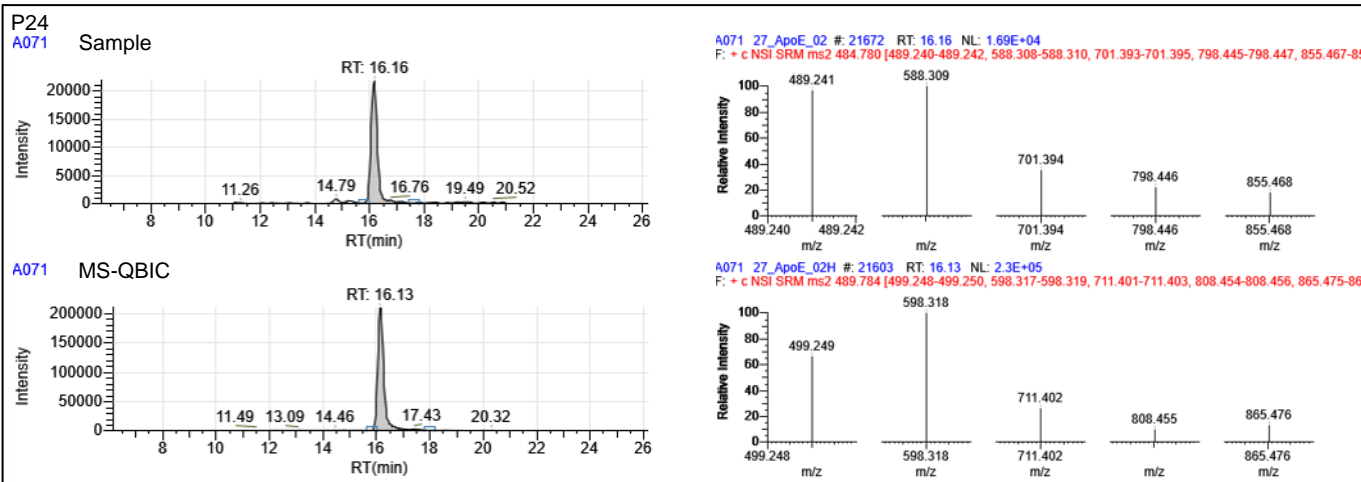

P25  
A074

Sample

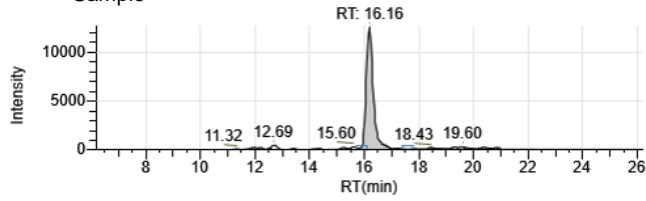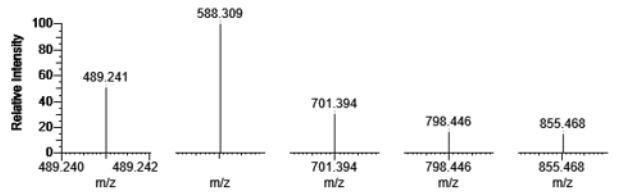

A074 MS-QBIC

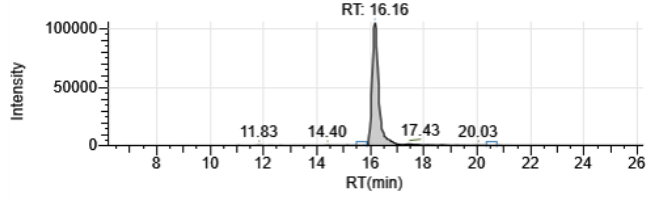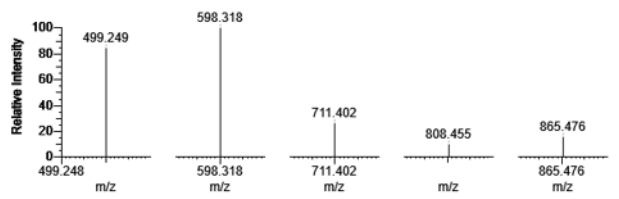

P26  
A044

Sample

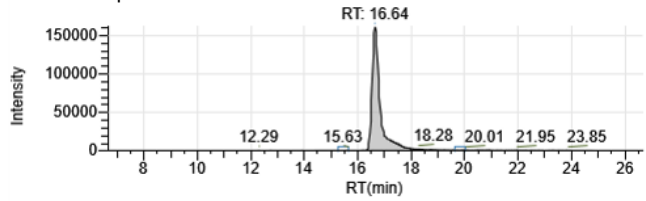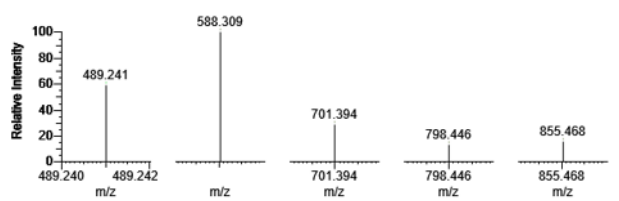

A044 MS-QBIC

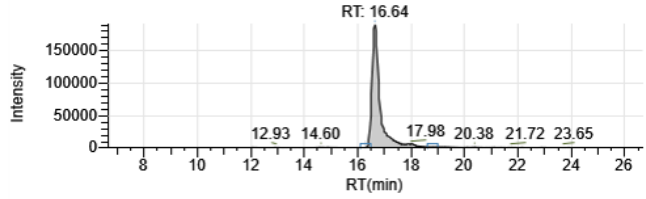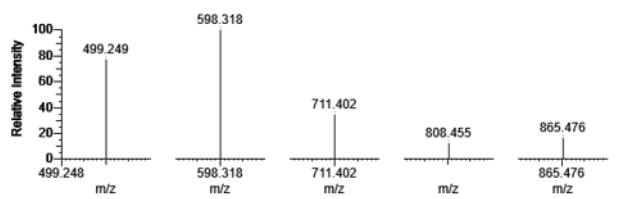

P27  
A059

Sample

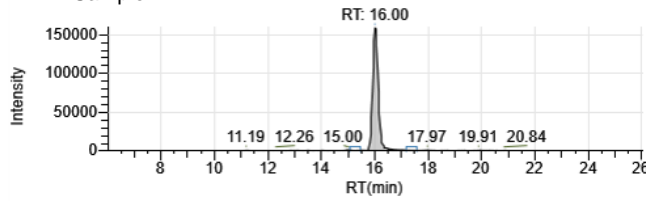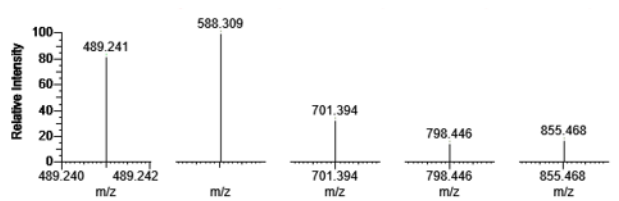

A059 MS-QBIC

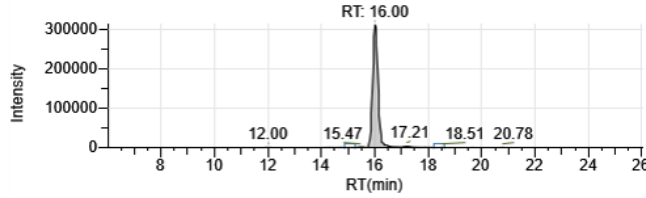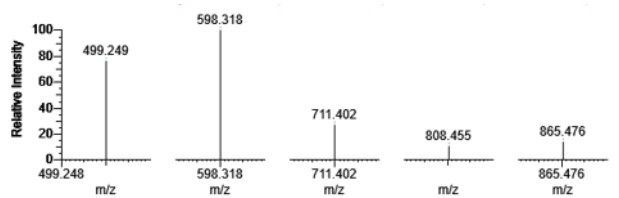

P28  
A068

Sample

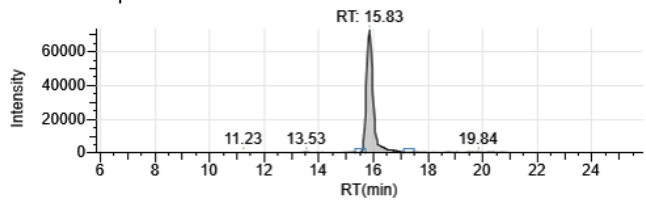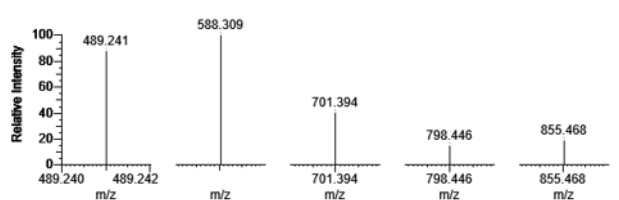

A068 MS-QBIC

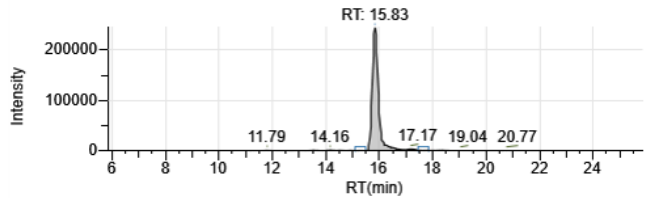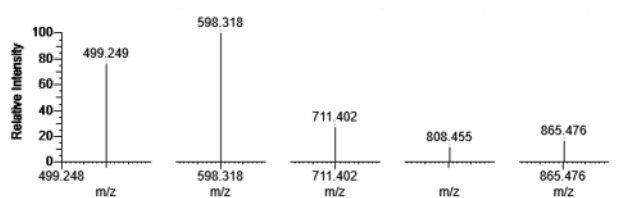



P29

A056

Sample

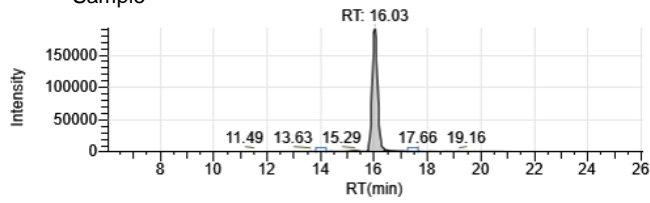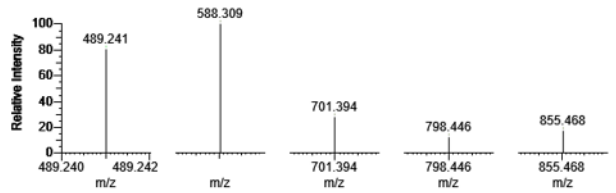

A056

MS-QBIC

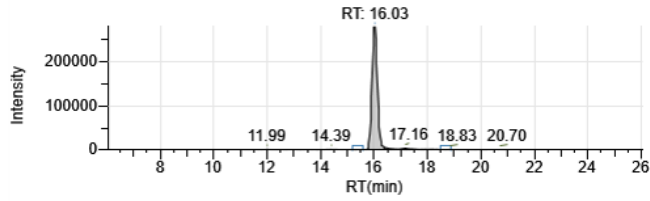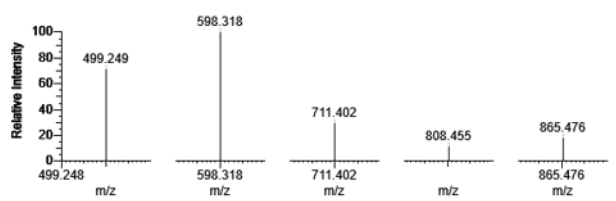

P30

A080

Sample

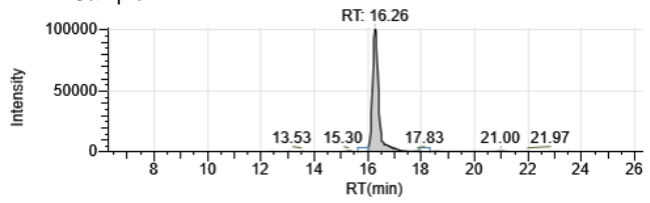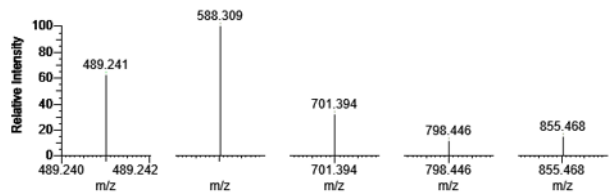

A080

MS-QBIC

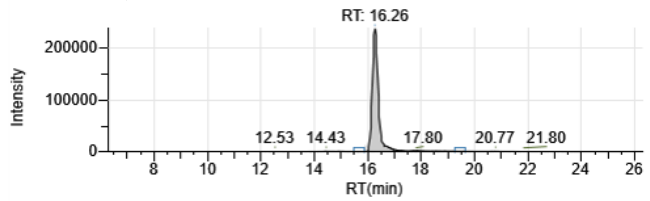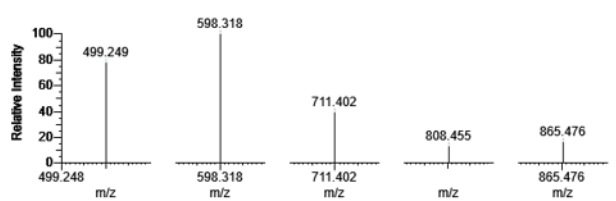

# J Gelsolin (EPGLQIWR) Heart

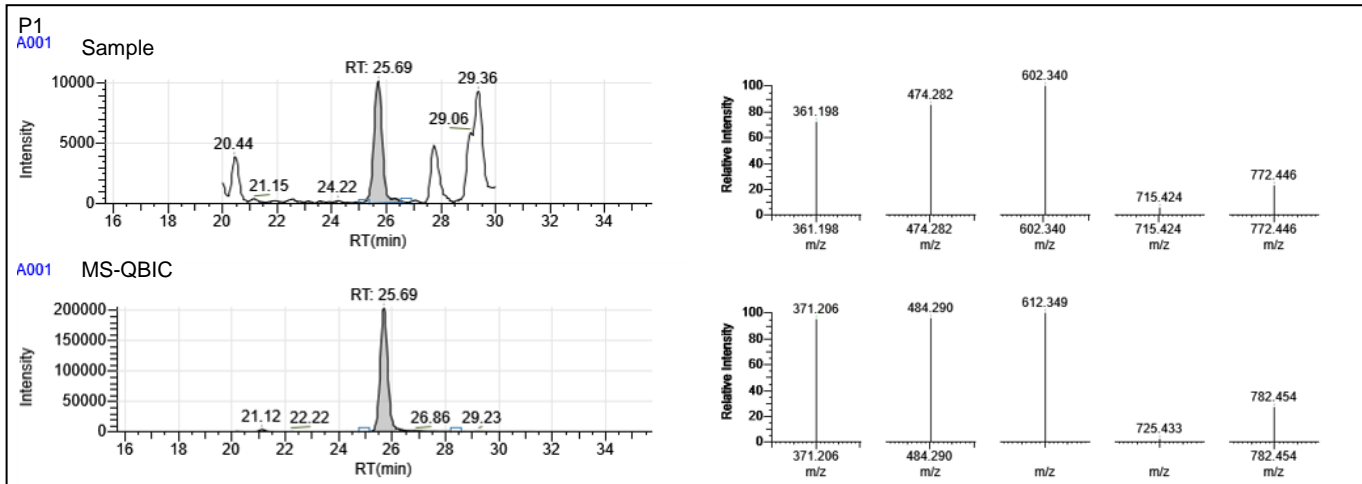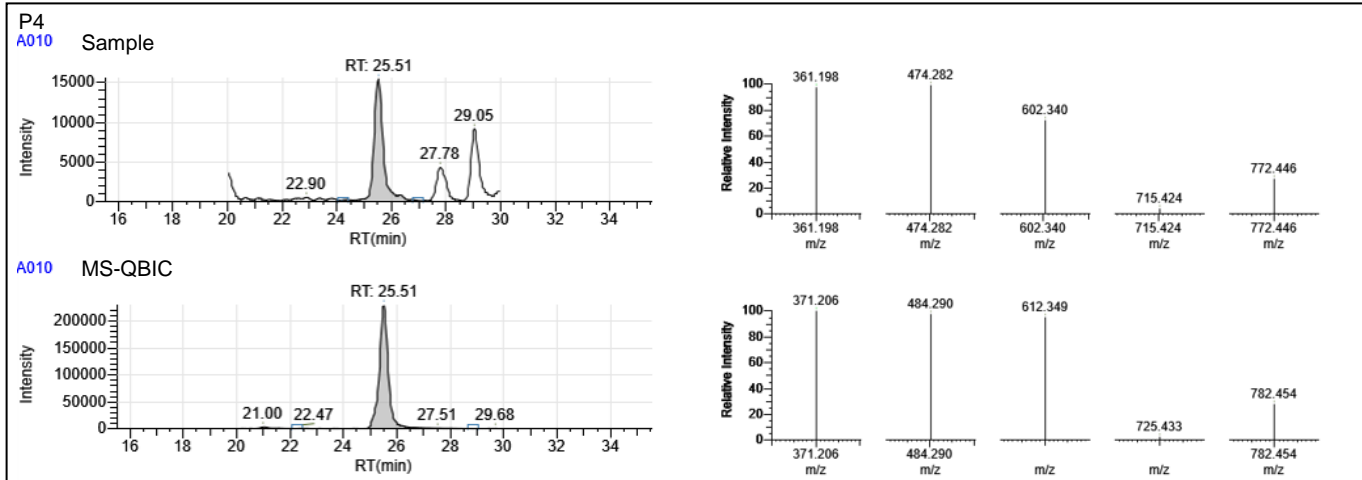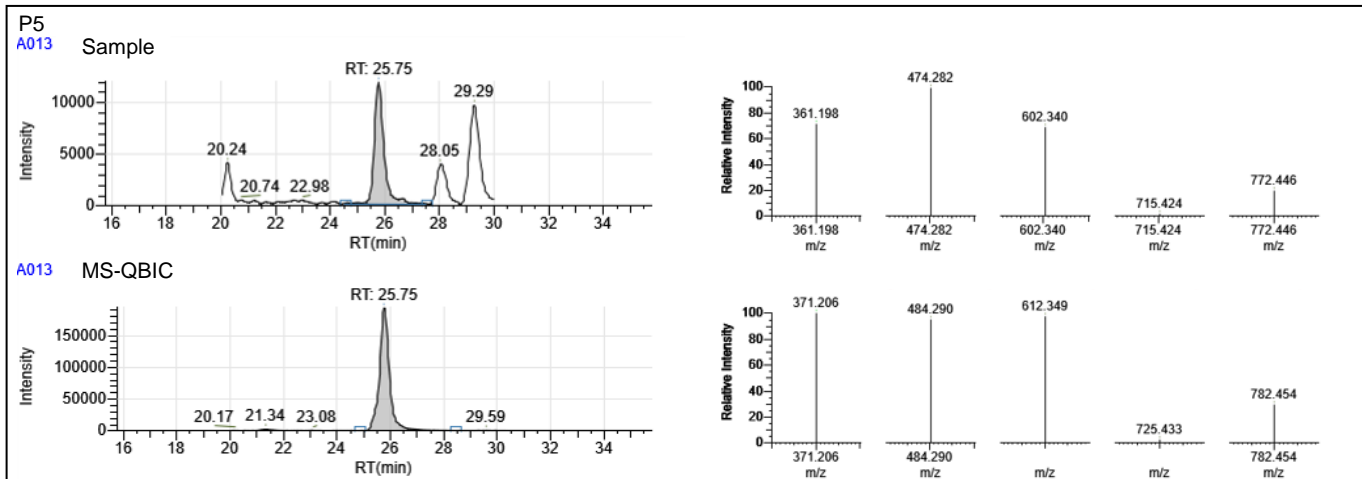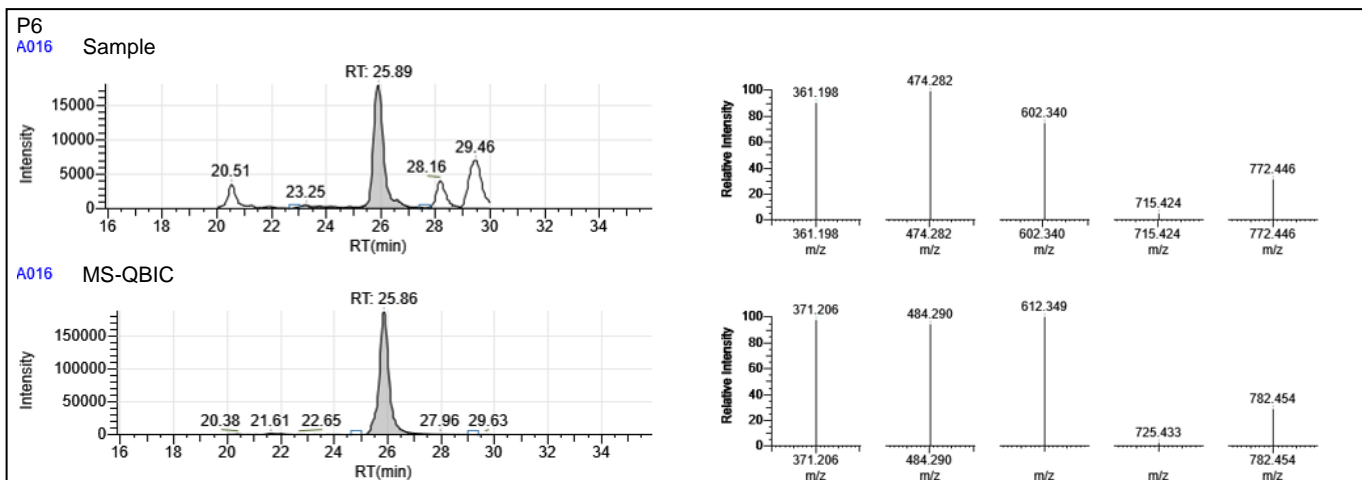

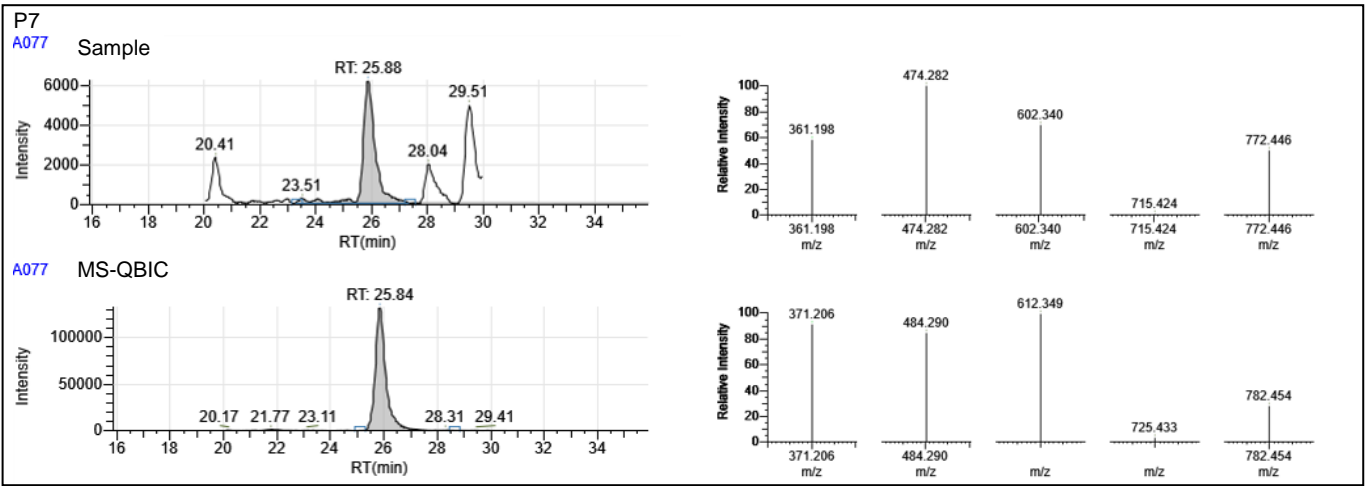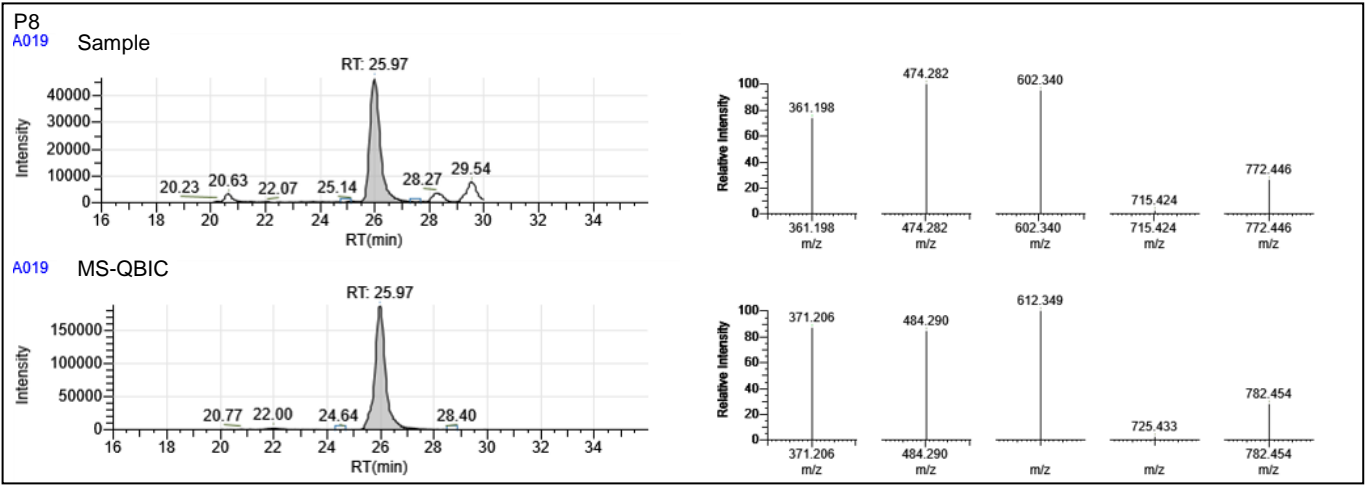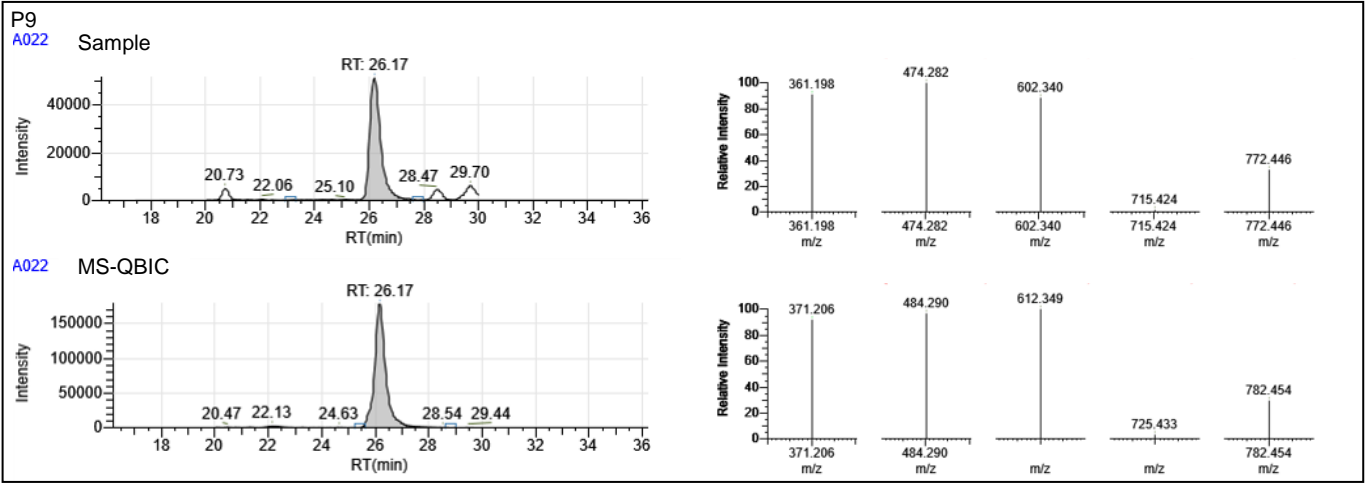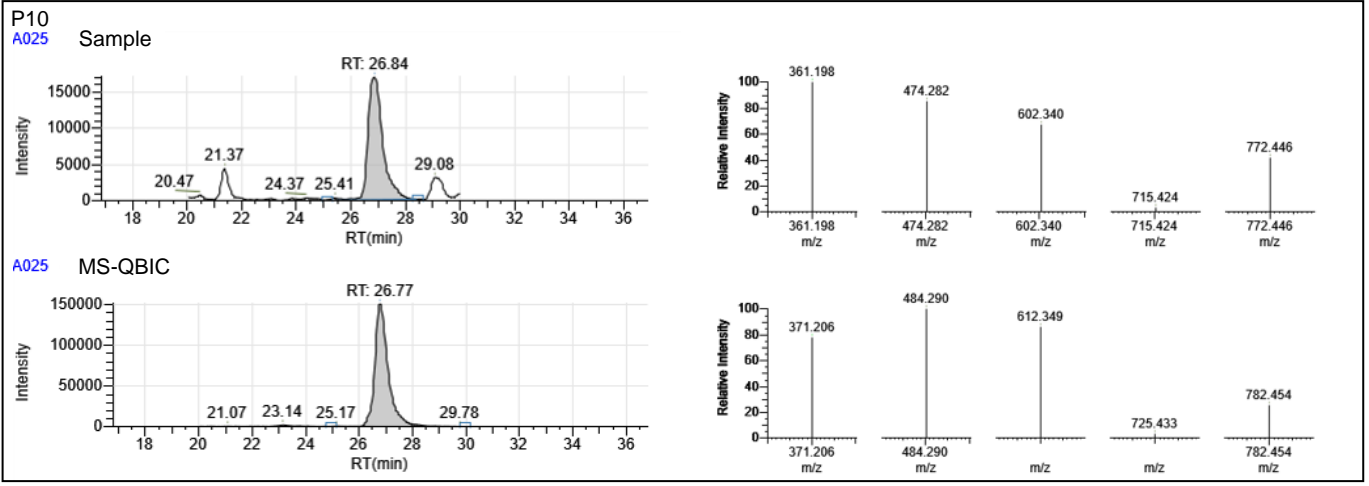

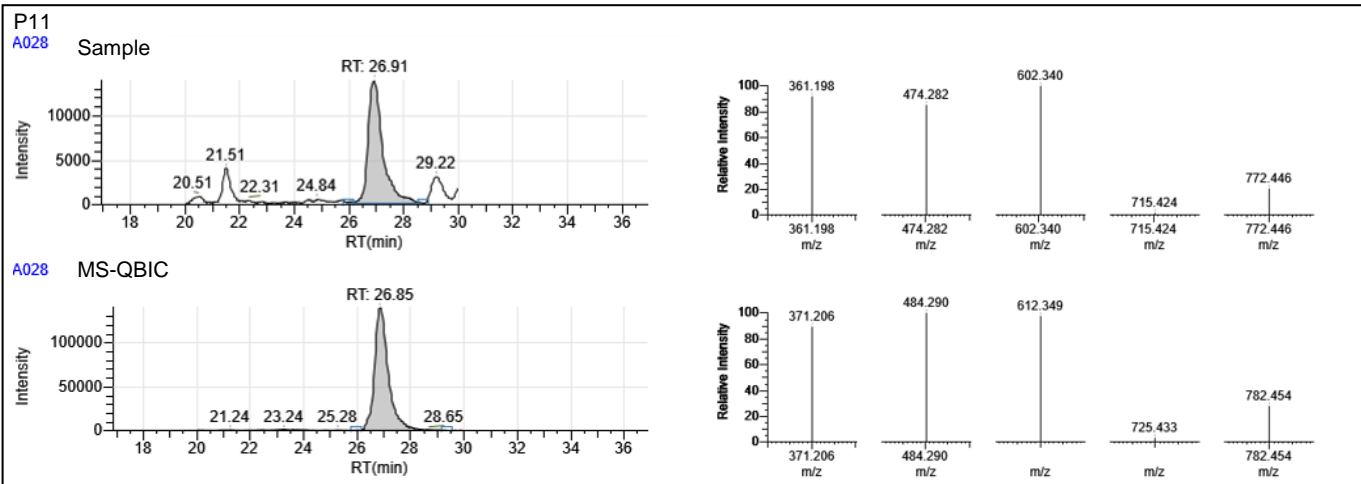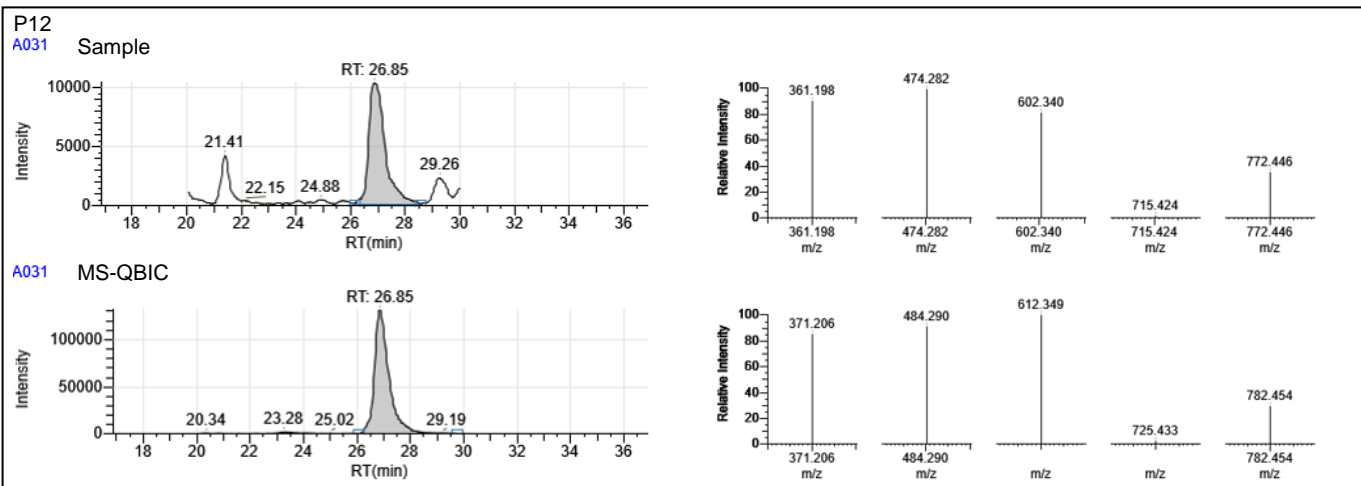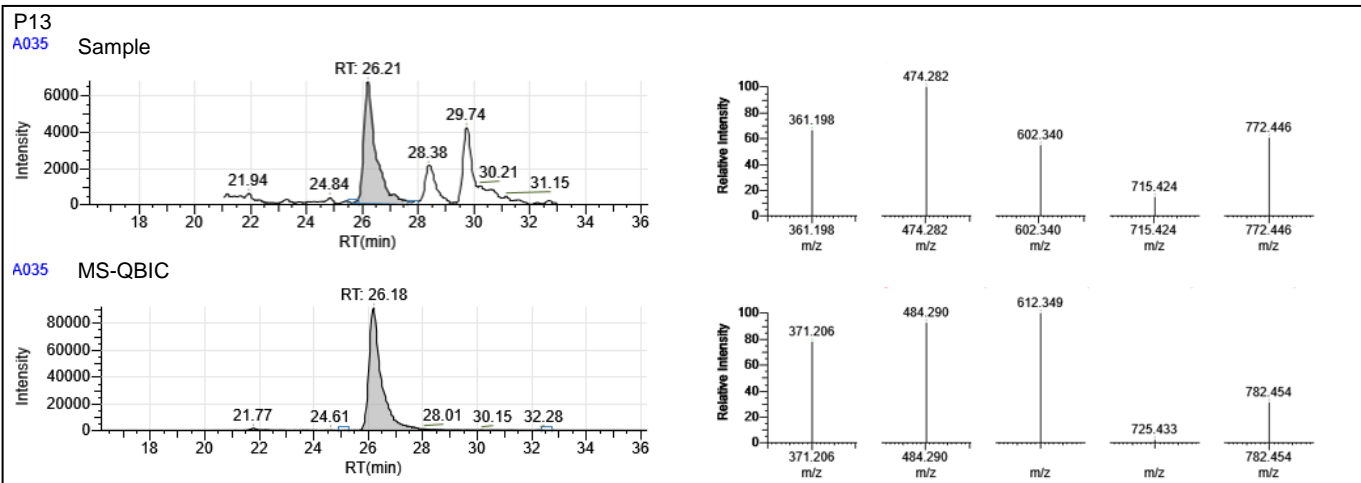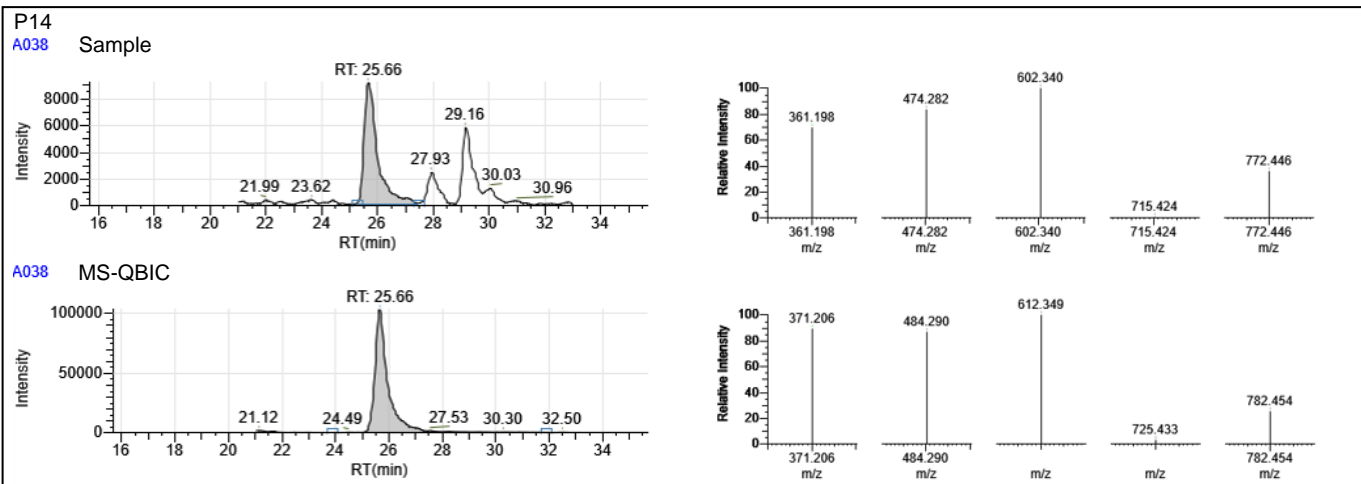

P15  
A086 Sample

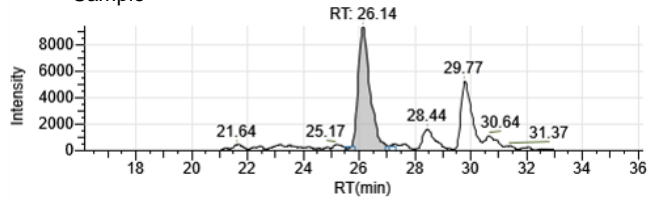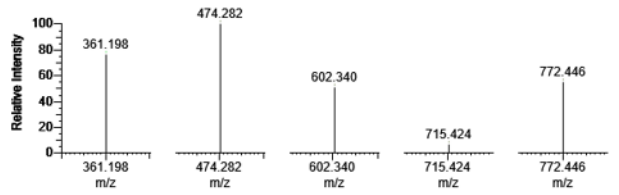

A086 MS-QBIC

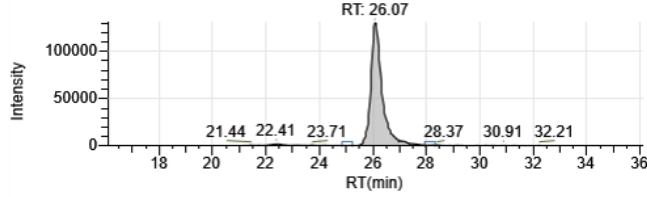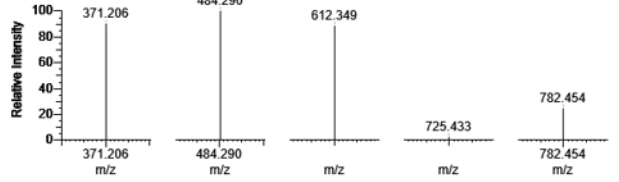

P16  
A088 Sample

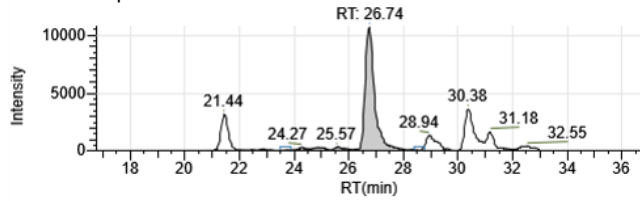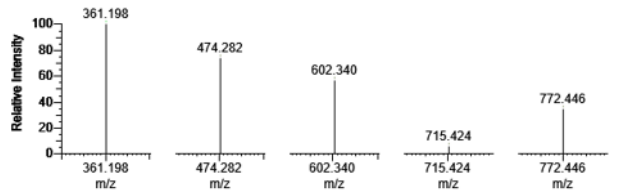

A088 MS-QBIC

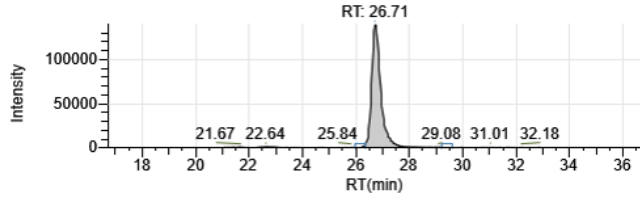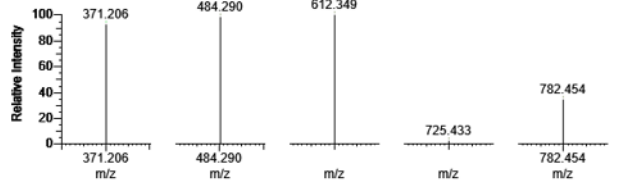

P17  
A046 Sample

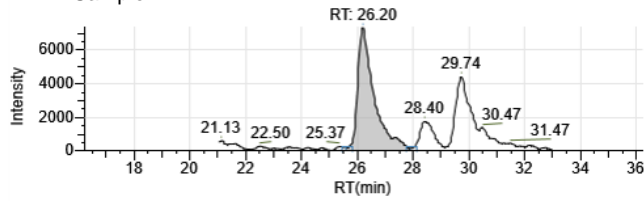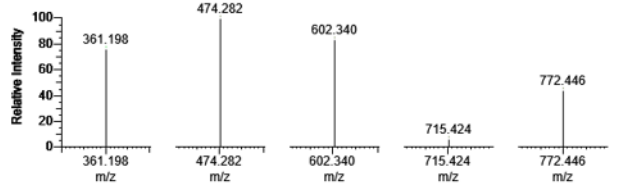

A046 MS-QBIC

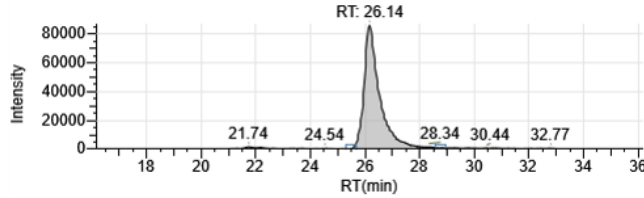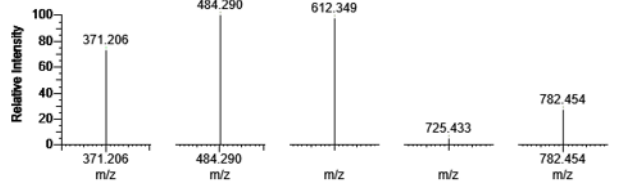

P18  
A050 Sample

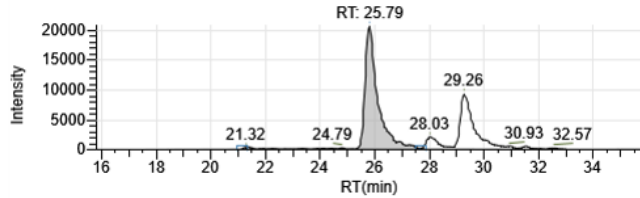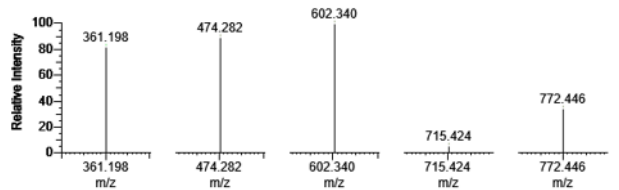

A050 MS-QBIC

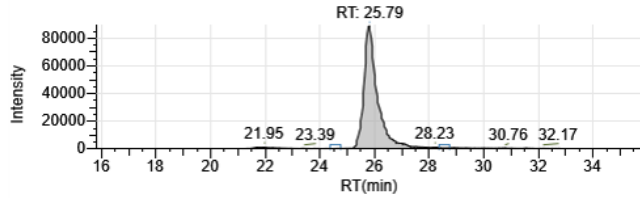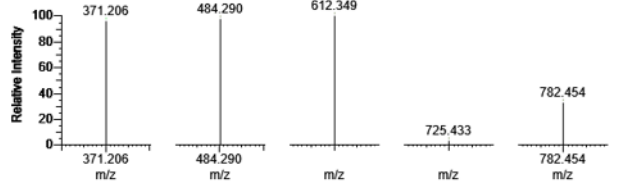

P19  
A053 Sample

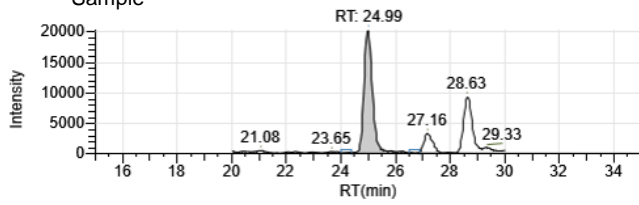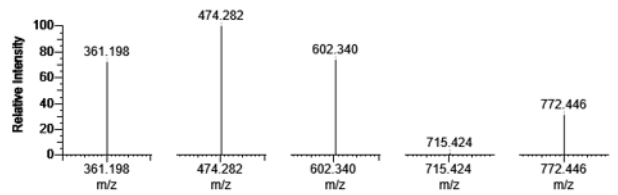

A053 MS-QBIC

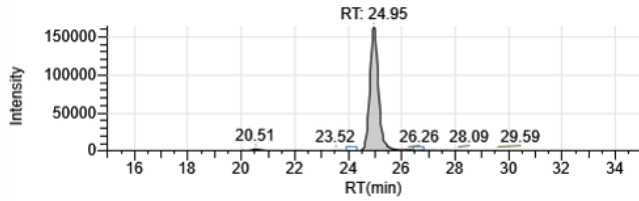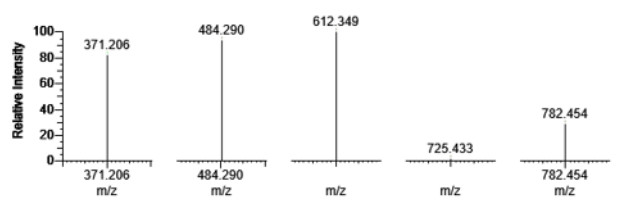

P20  
A061 Sample

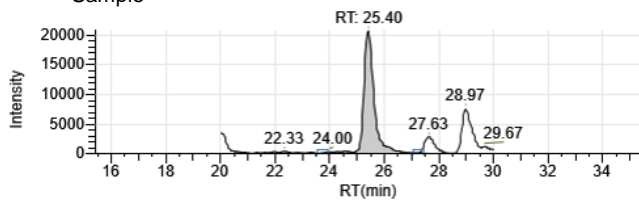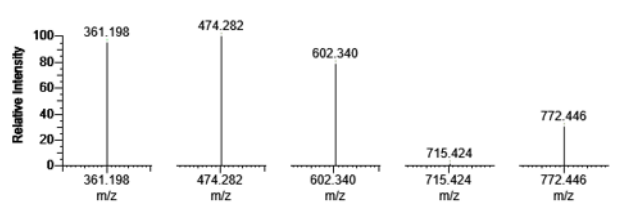

A061 MS-QBIC

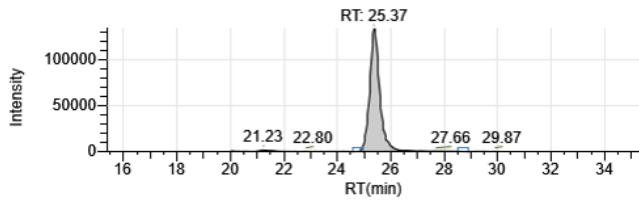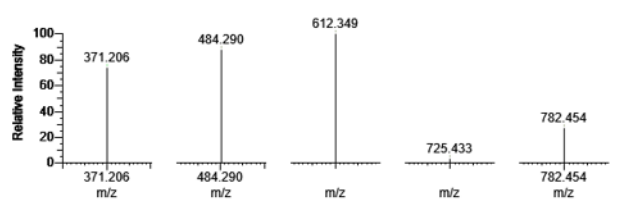

P21  
A064 Sample

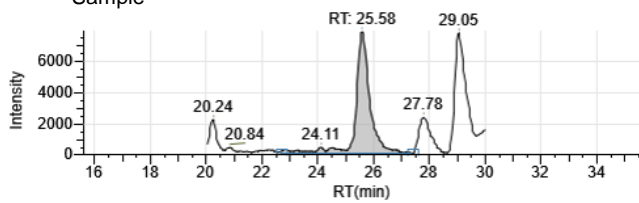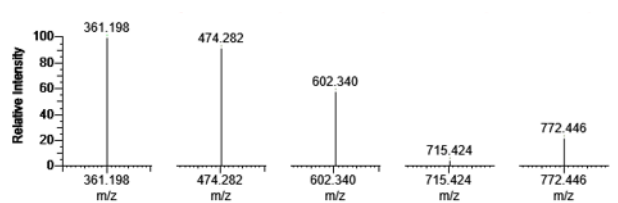

A064 MS-QBIC

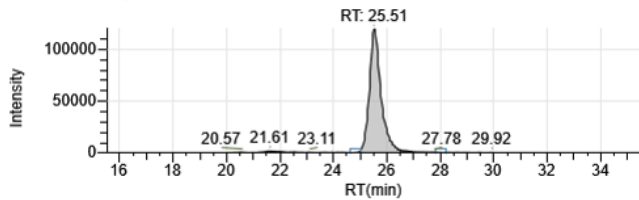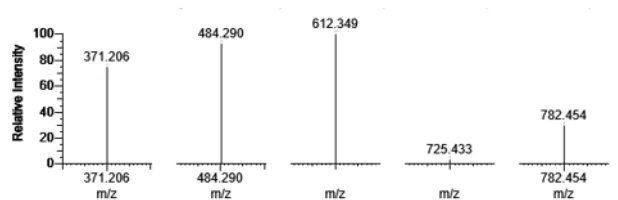

P22  
A040 Sample

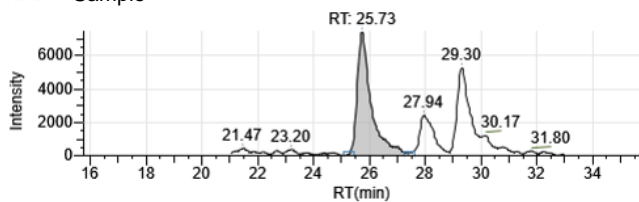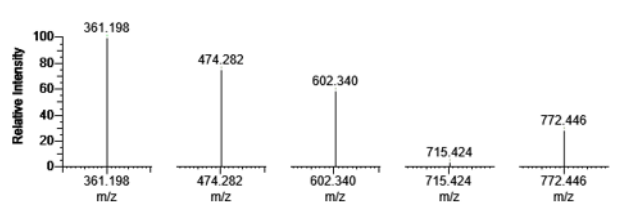

A040 MS-QBIC

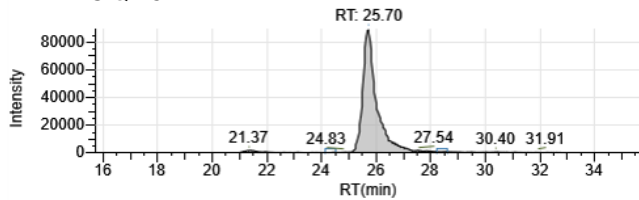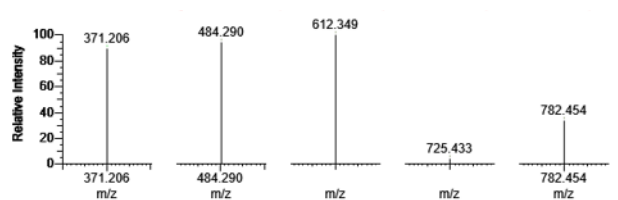

P23  
A083 Sample

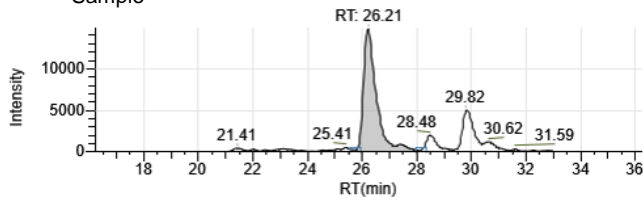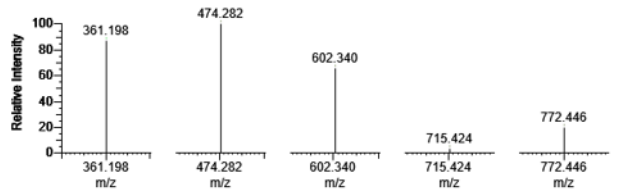

A083 MS-QBIC

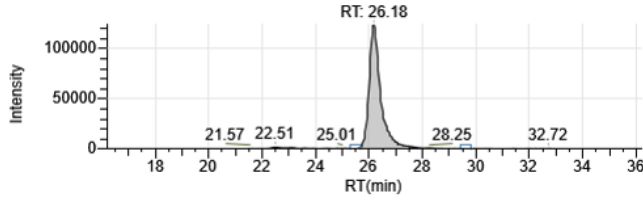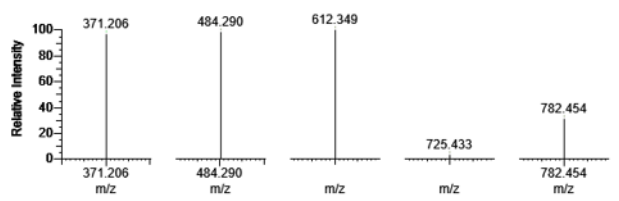

P24  
A070 Sample

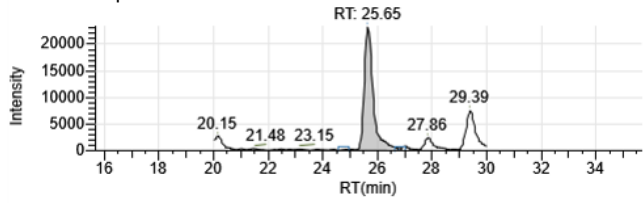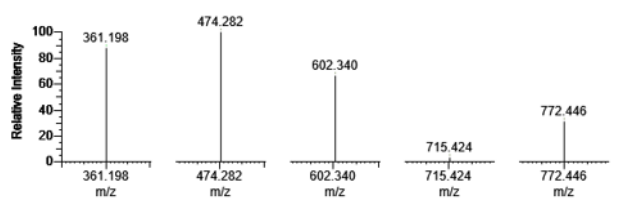

A070 MS-QBIC

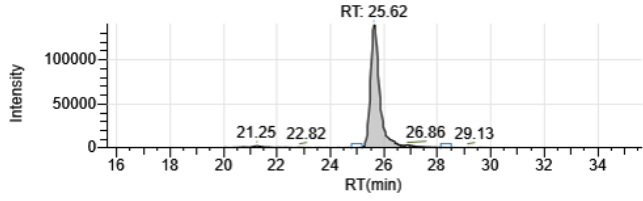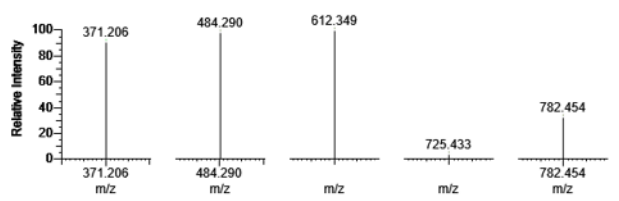

P25  
A074 Sample

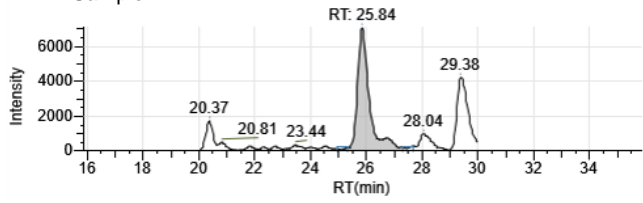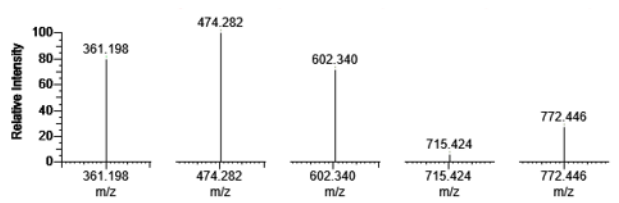

A074 MS-QBIC

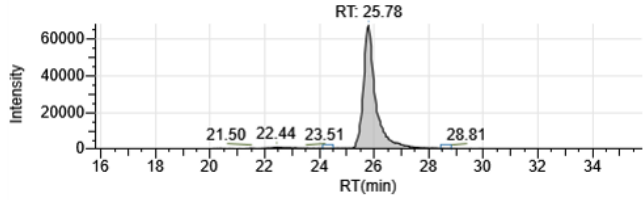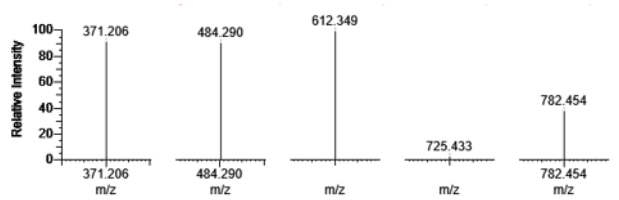

P26  
A043 Sample

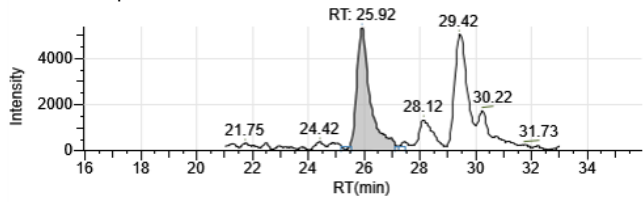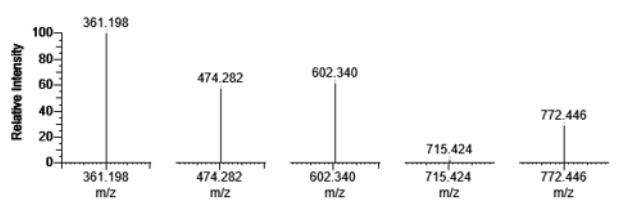

A043 MS-QBIC

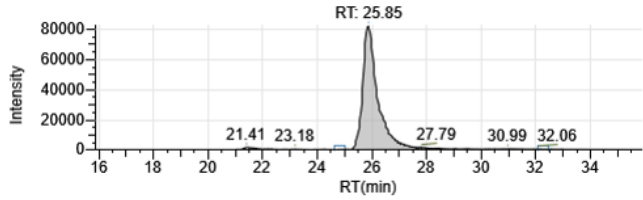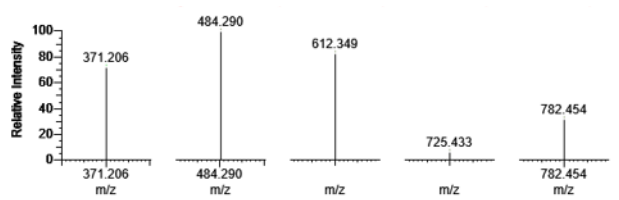



P30  
A080 Sample

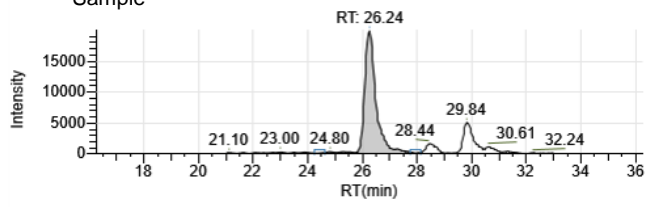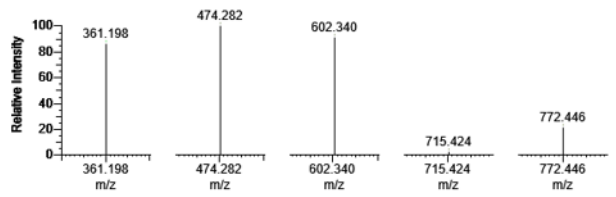

A080 MS-QBIC

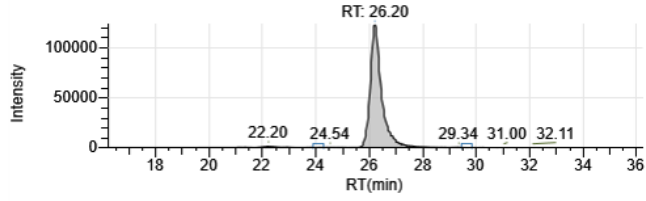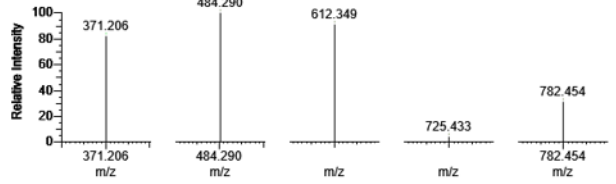

# K. FGA (GGSTSYGTGSETESPR) Heart

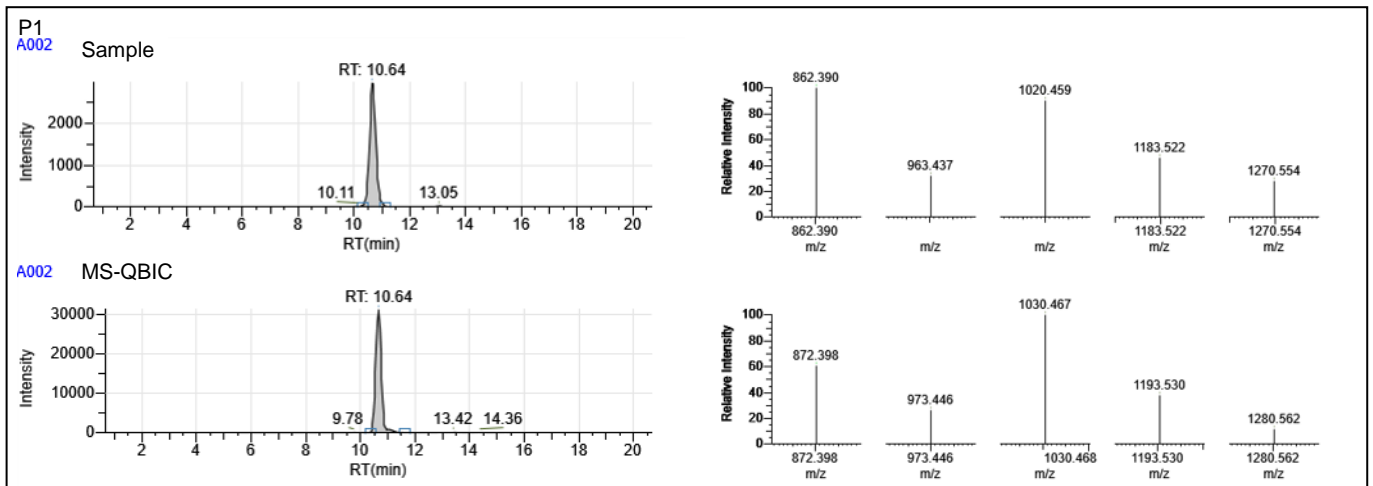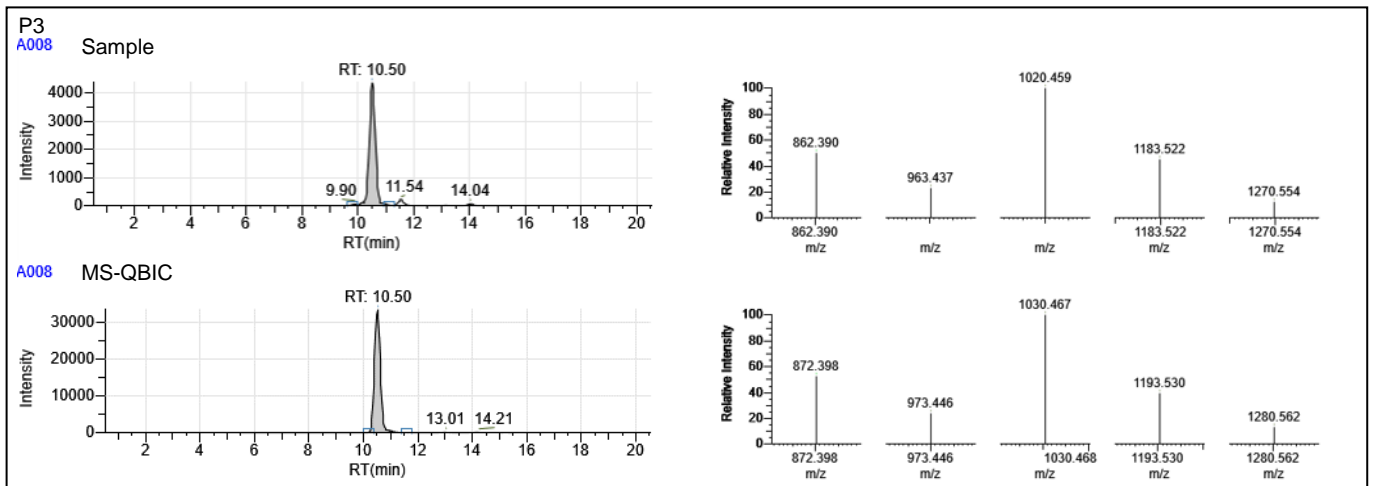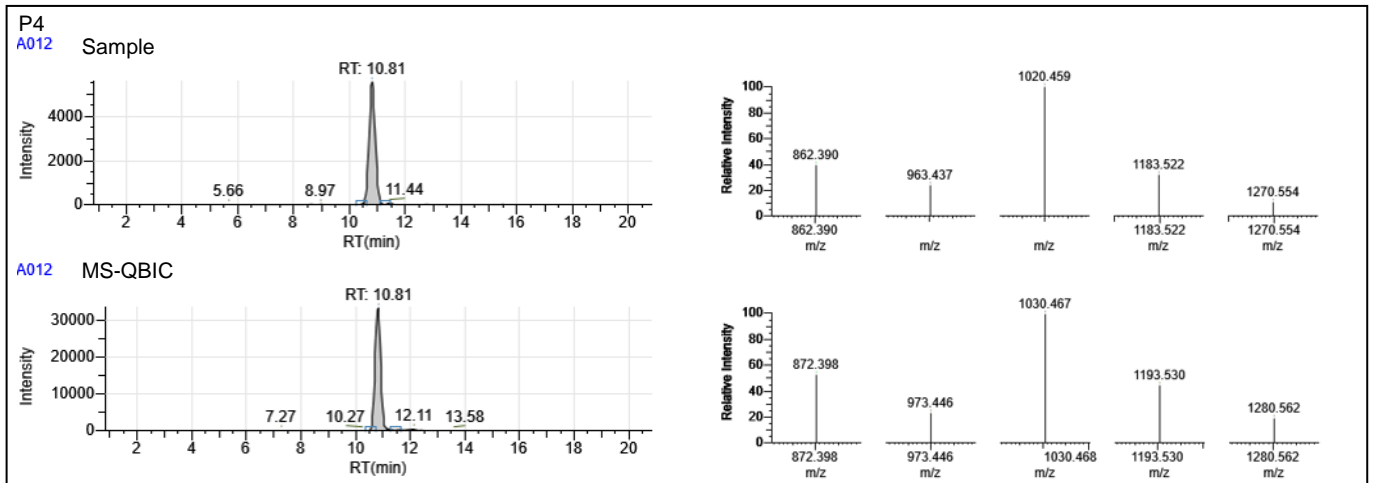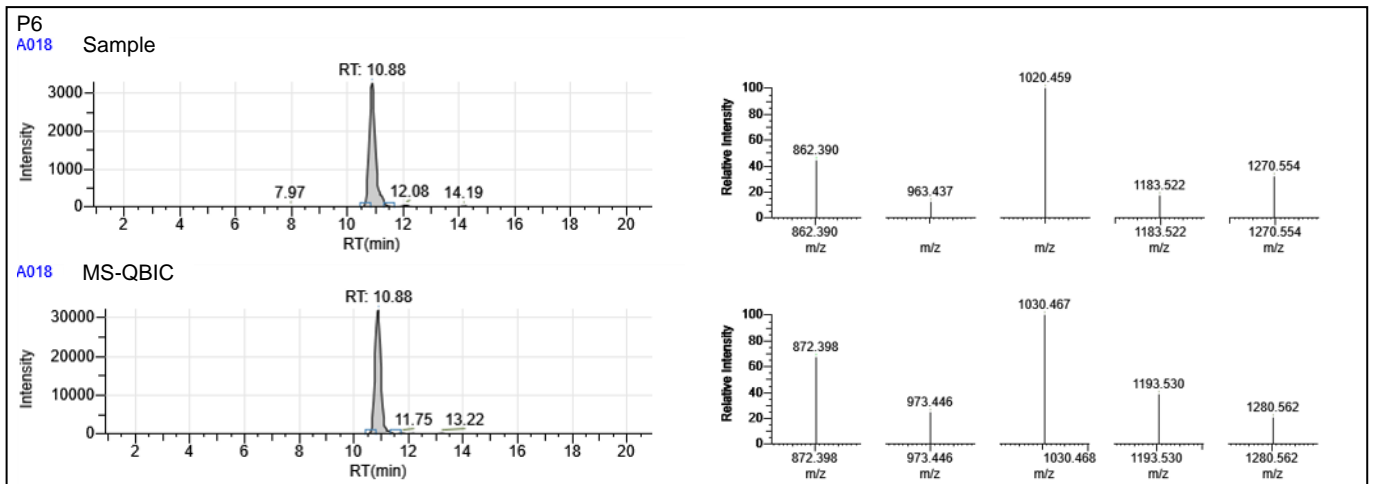

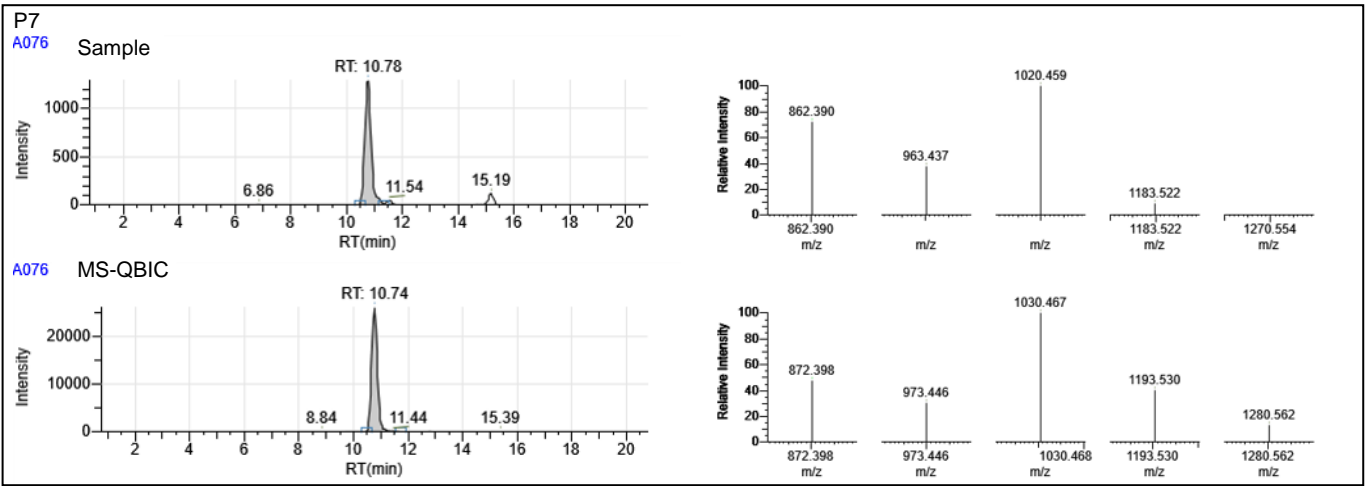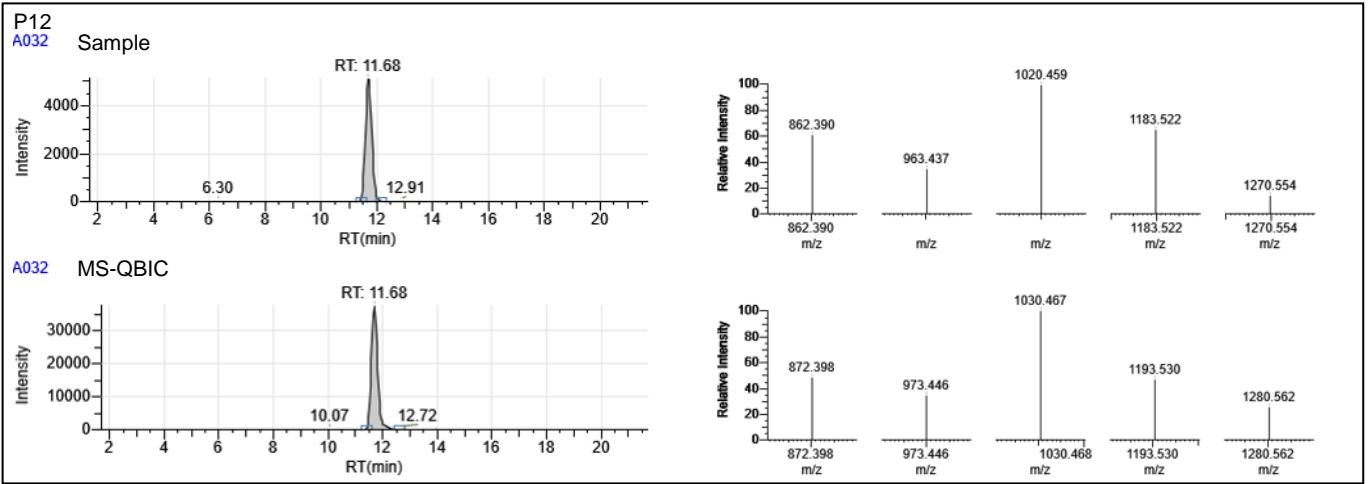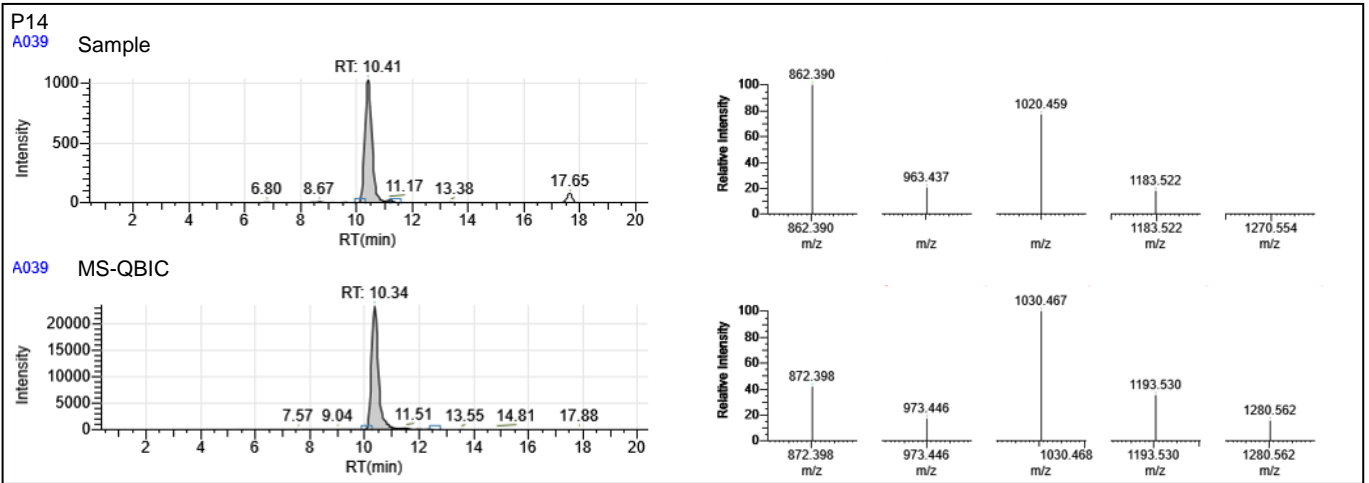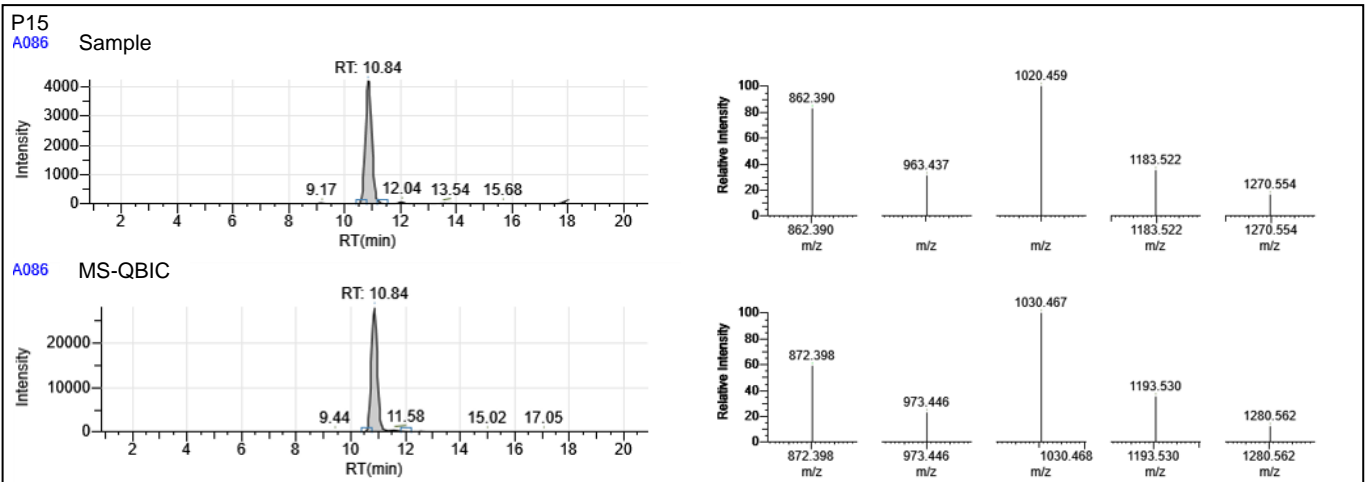

P17  
A046 Sample

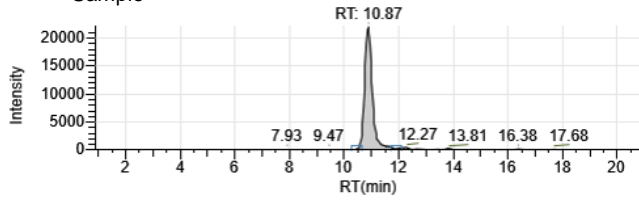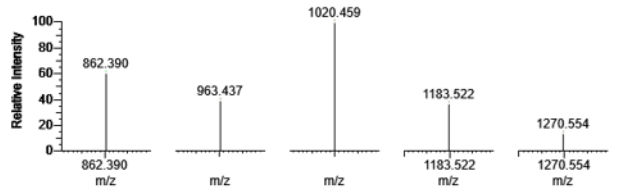

A046 MS-QBIC

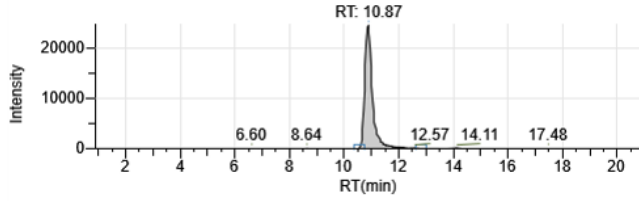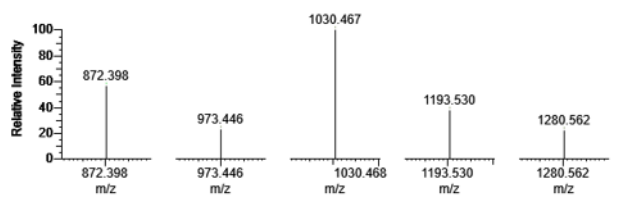

P18  
A051 Sample

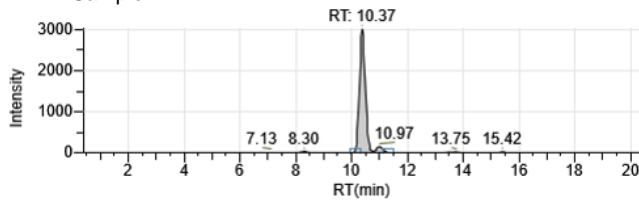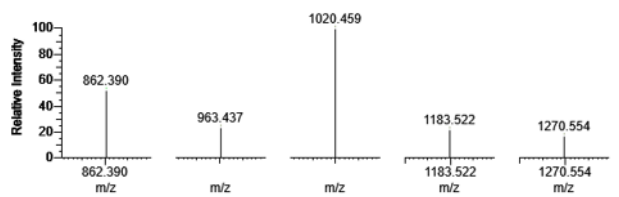

A051 MS-QBIC

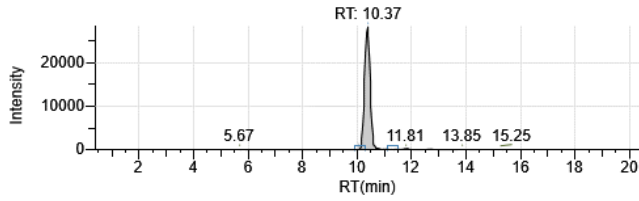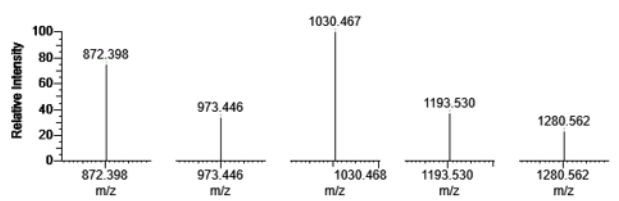

P19  
A053 Sample

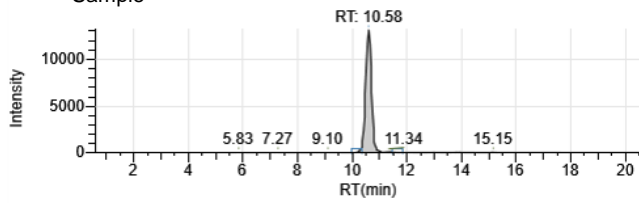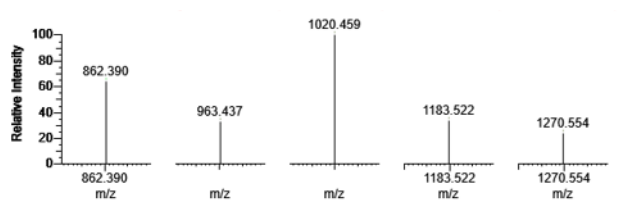

A053 MS-QBIC

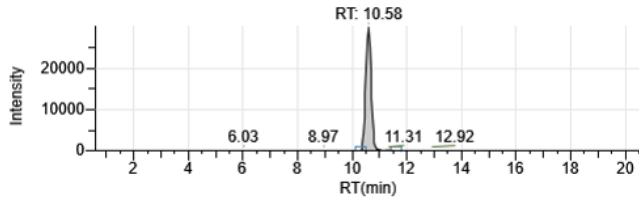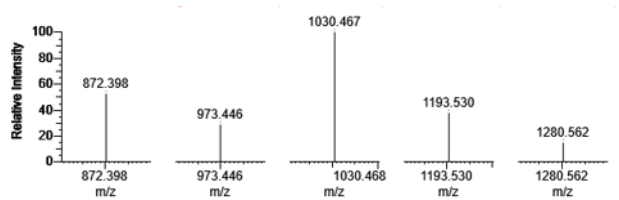

P20  
A062 Sample

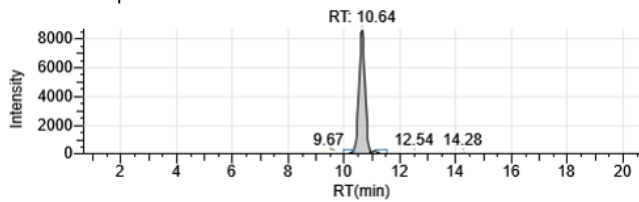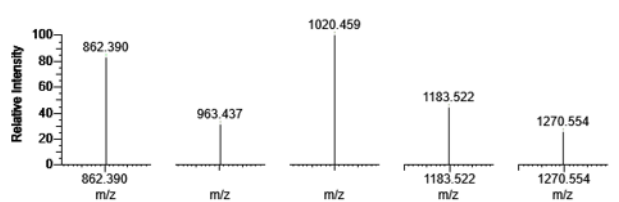

A062 MS-QBIC

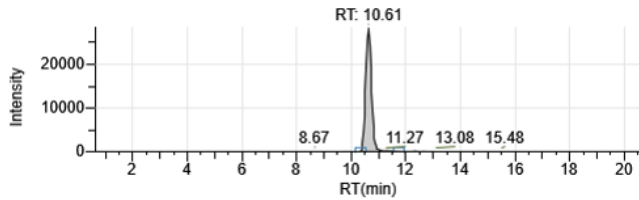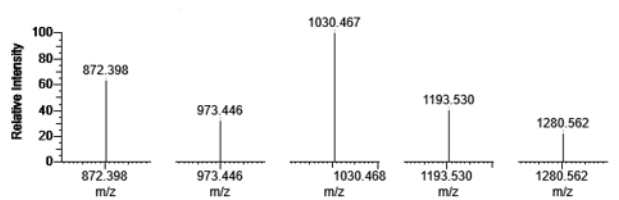

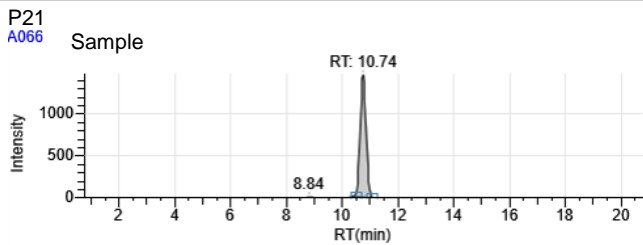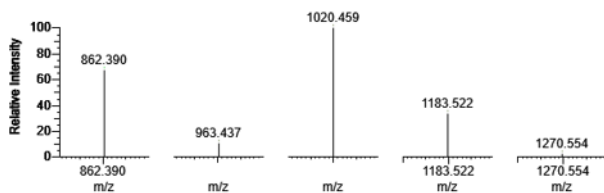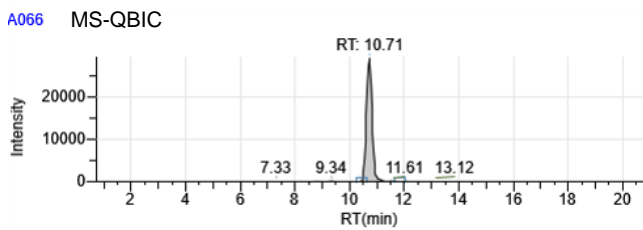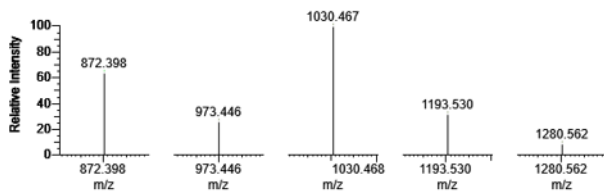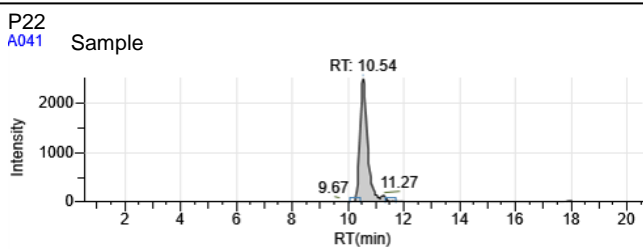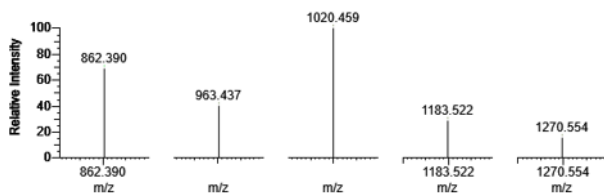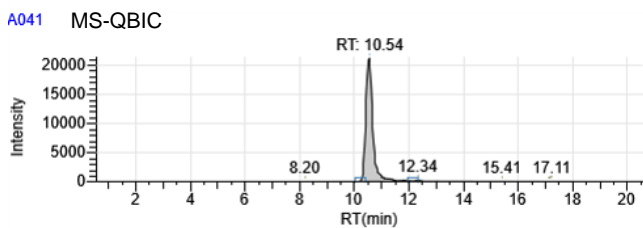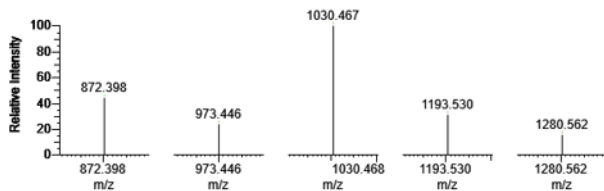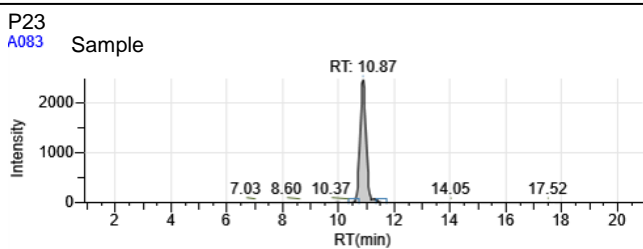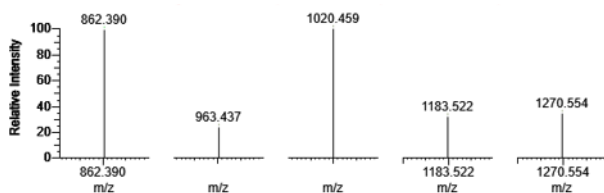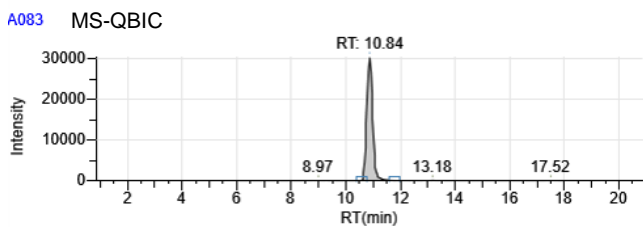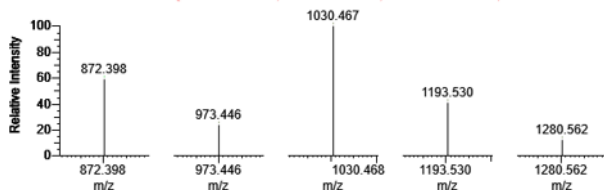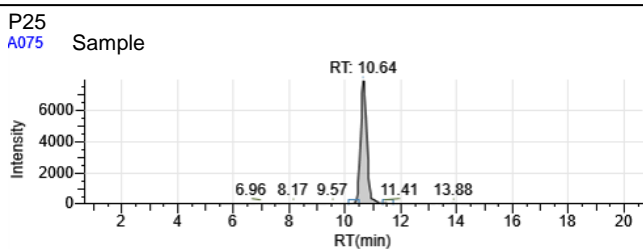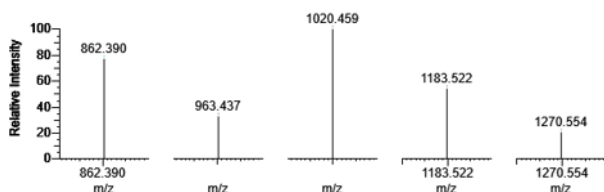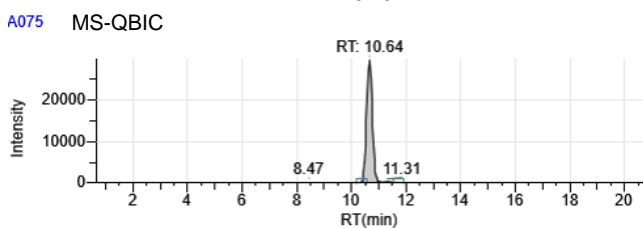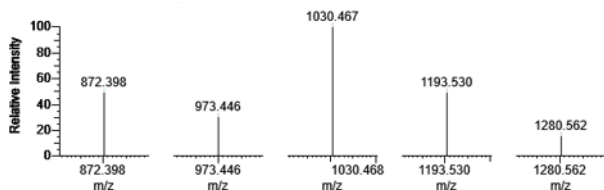

P26  
A043

Sample

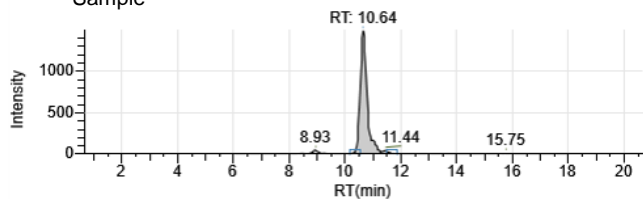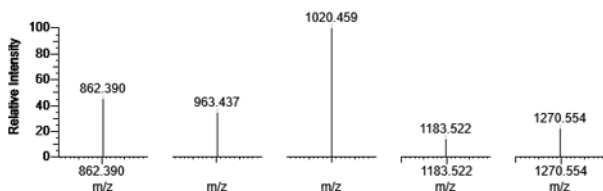

A043

MS-QBIC

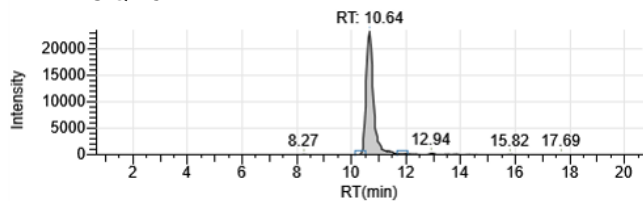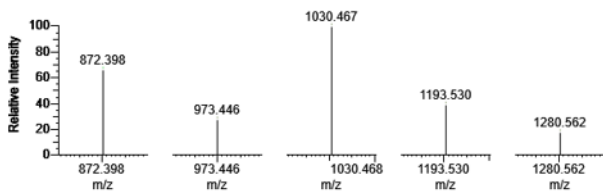

P28

A068

Sample

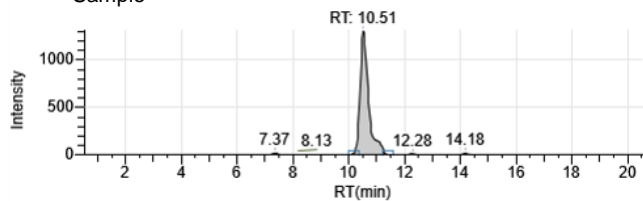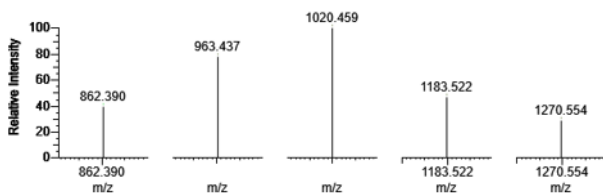

A068

MS-QBIC

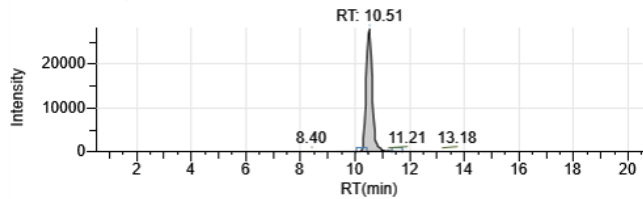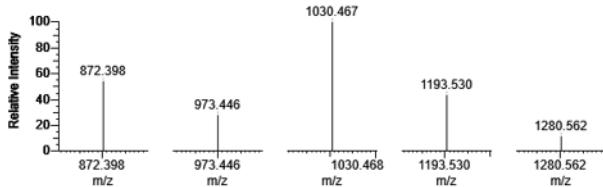

P29

A057

Sample

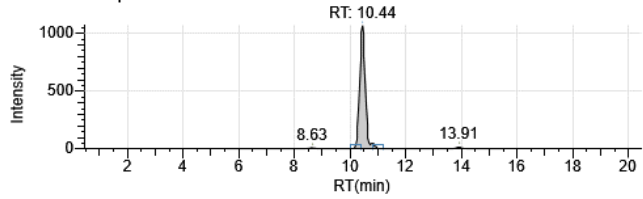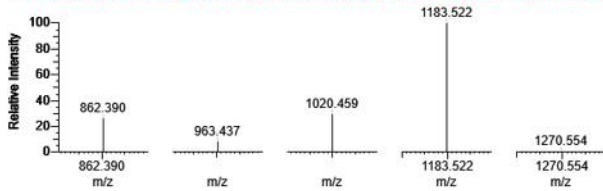

A057

MS-QBIC

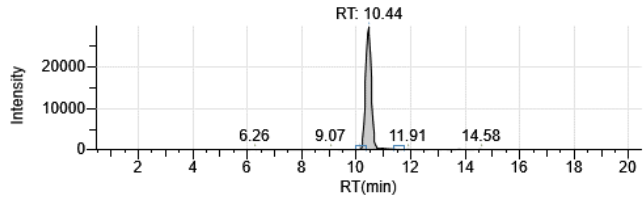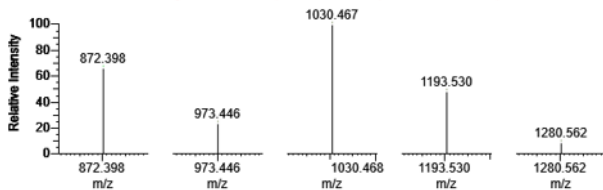

P30

A079

Sample

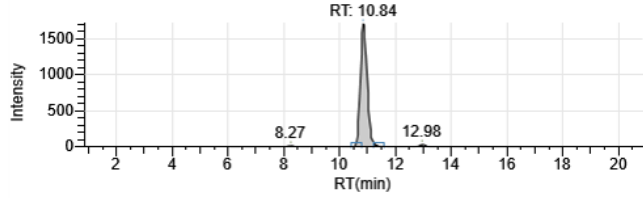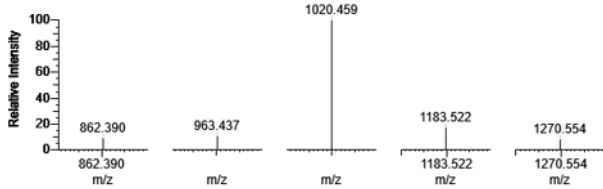

A079

MS-QBIC

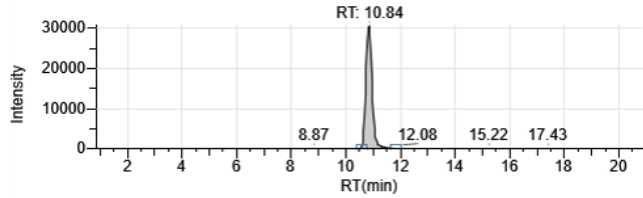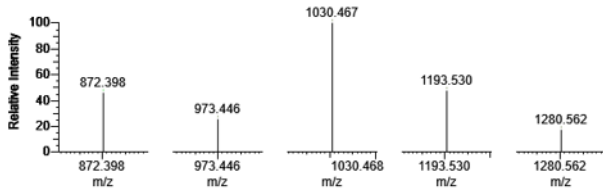

# L Lysozyme (STDYGIFQINSR) Heart

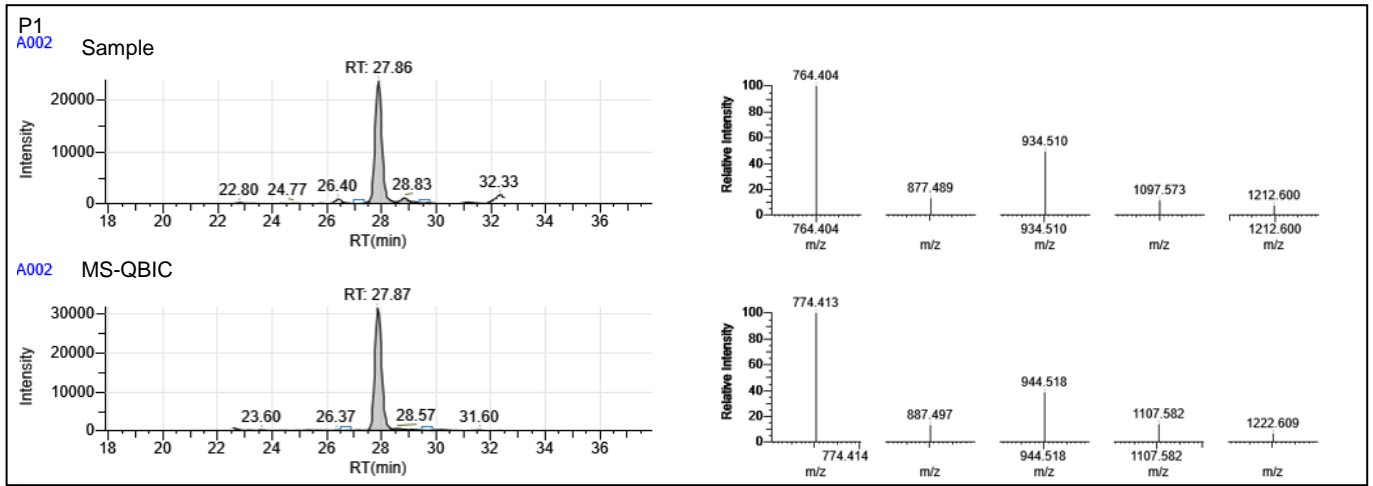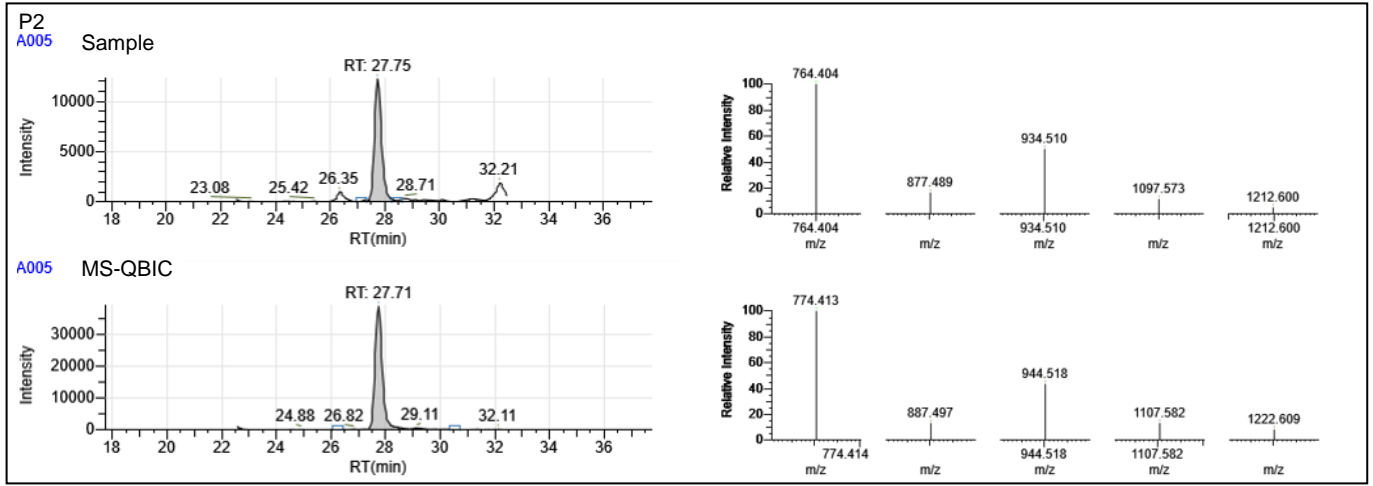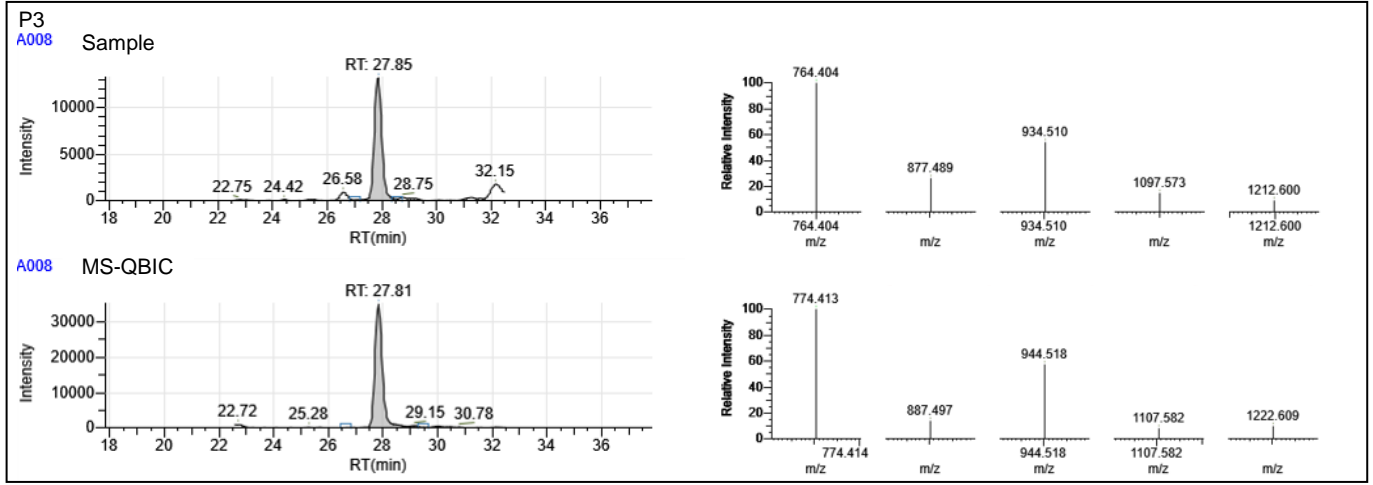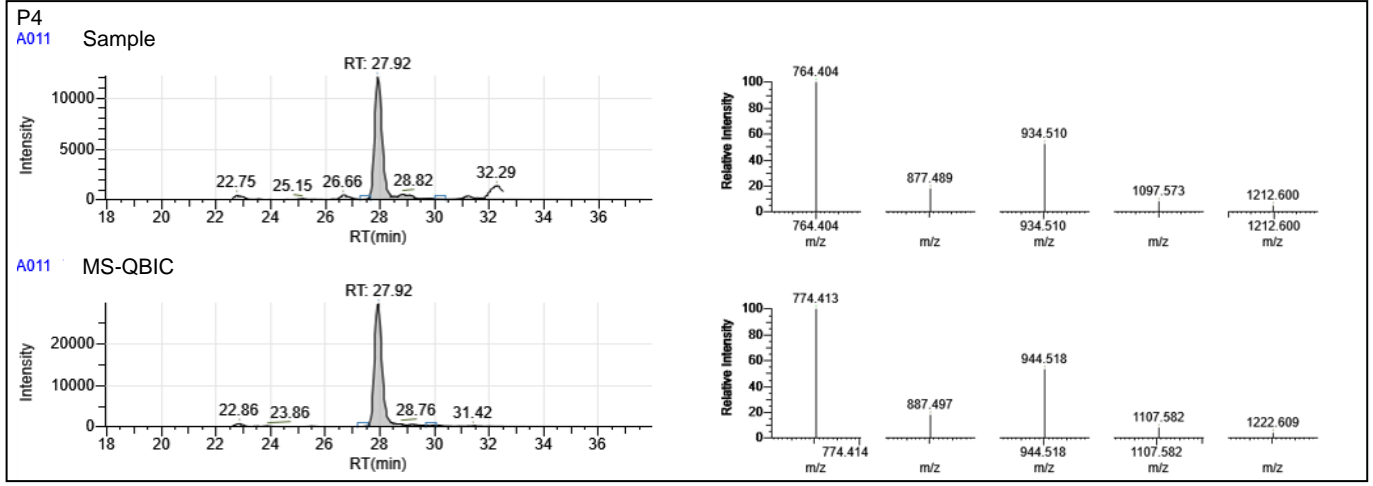



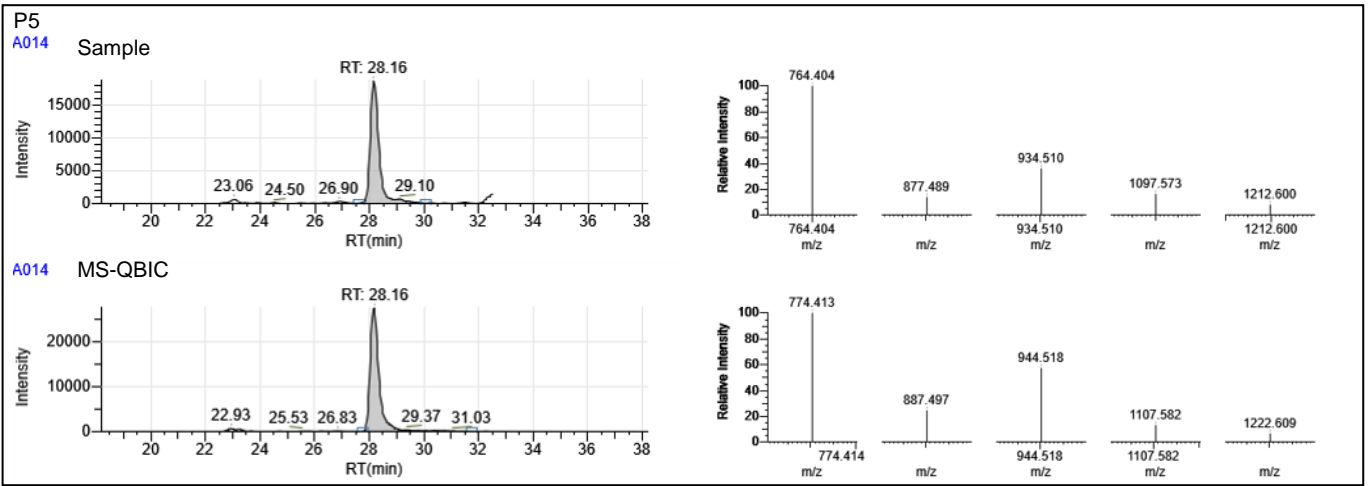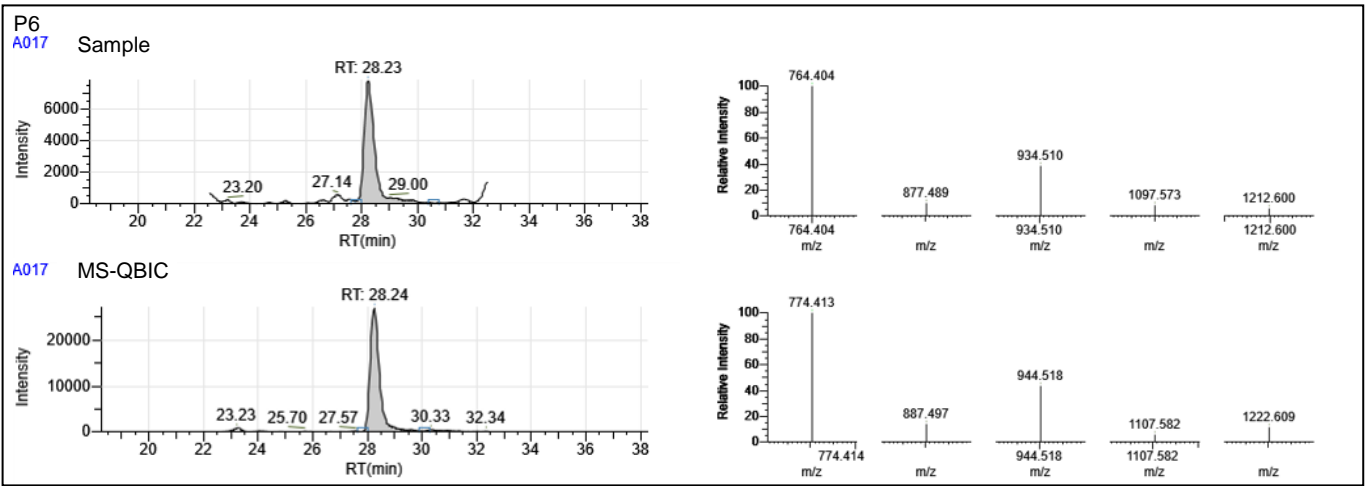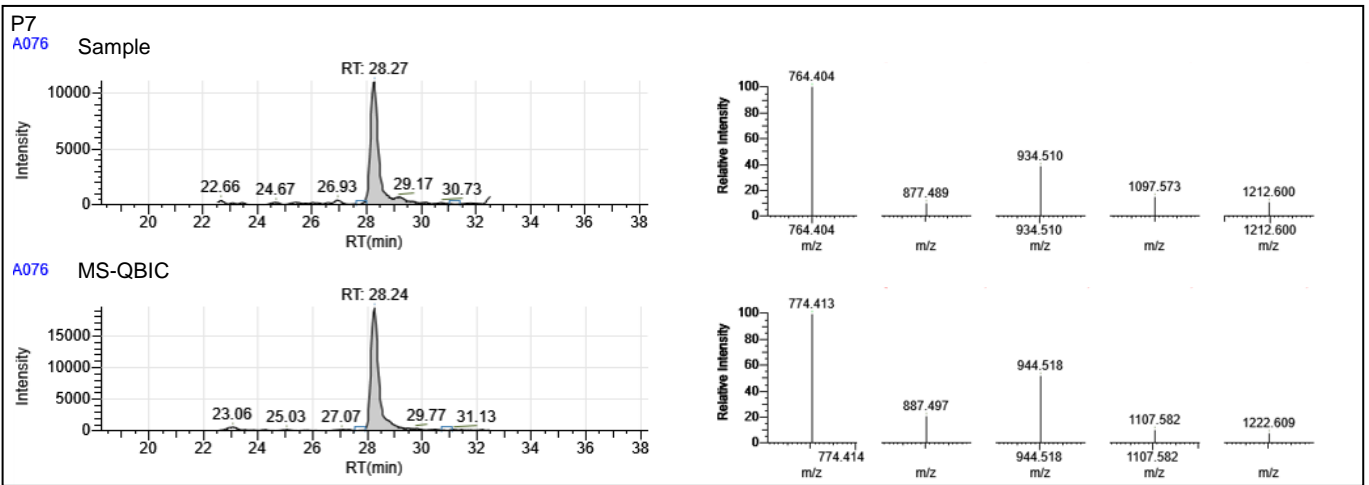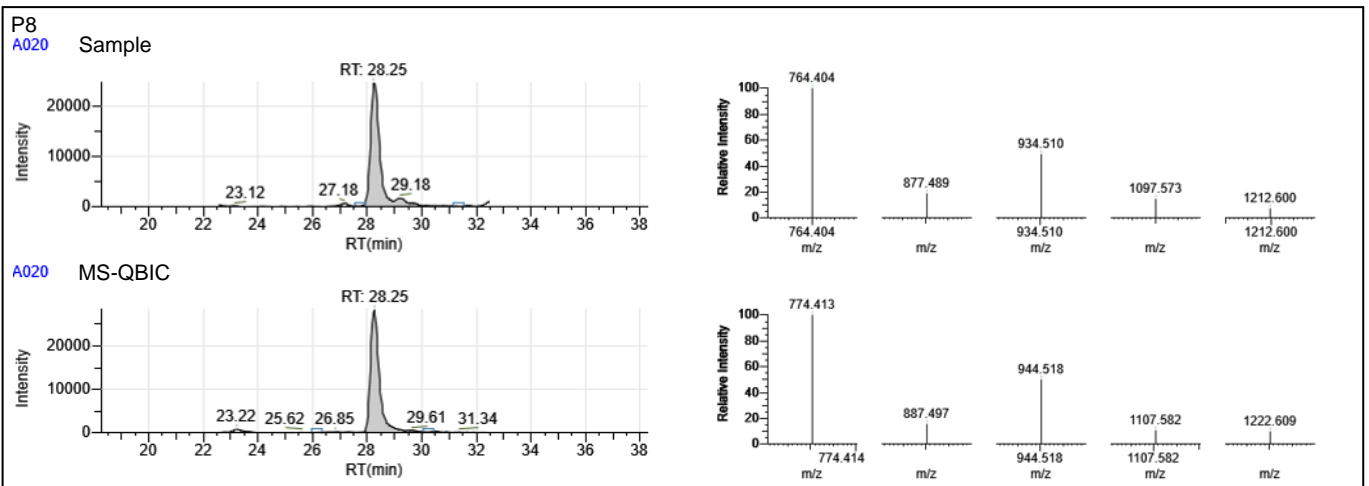

P9

A023

Sample

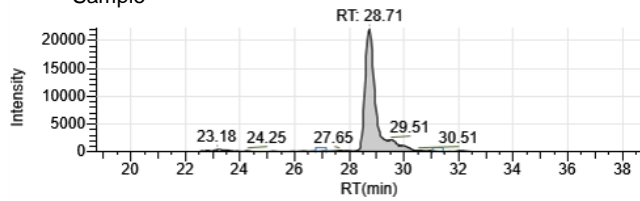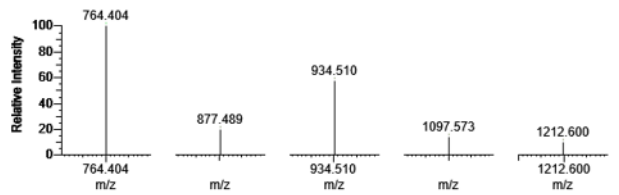

A023

MS-QBIC

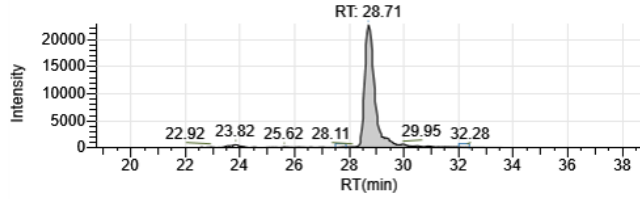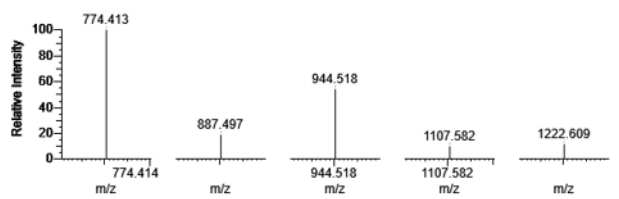

P10

A026

Sample

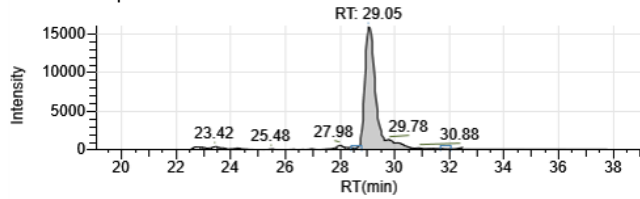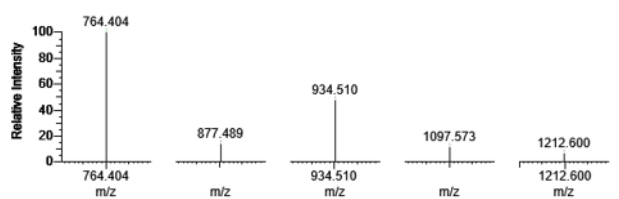

A026

MS-QBIC

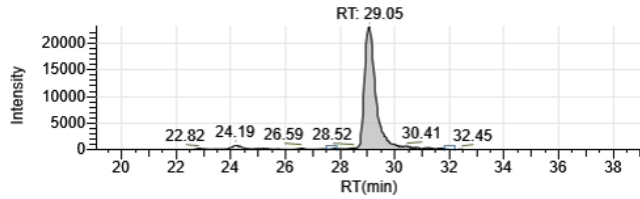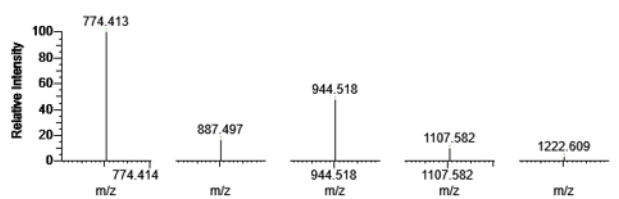

P11

A029

Sample

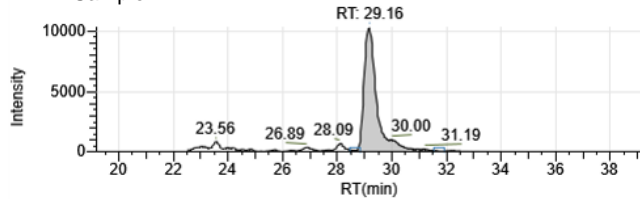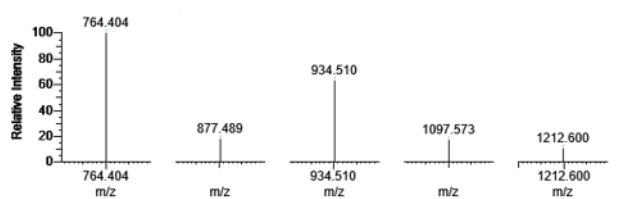

A029

MS-QBIC

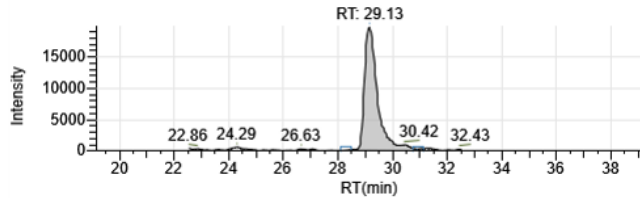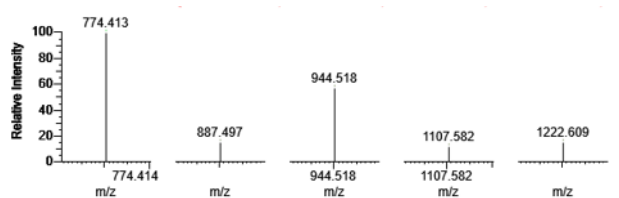

P12

A032

Sample

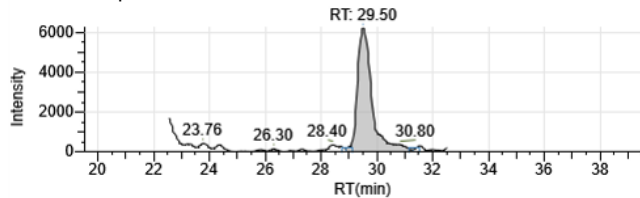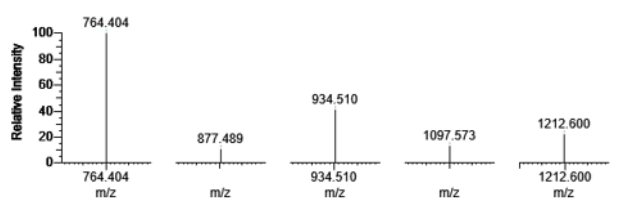

A032

MS-QBIC

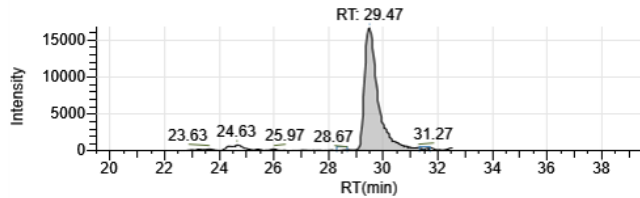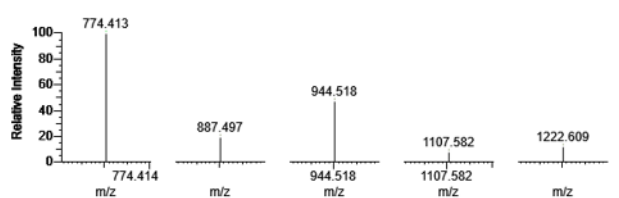

P13  
A034 Sample

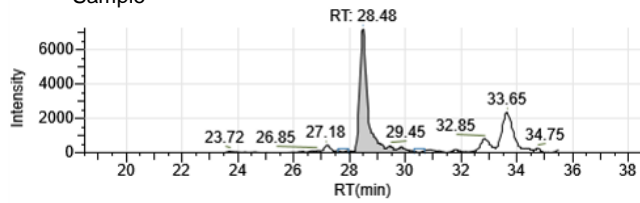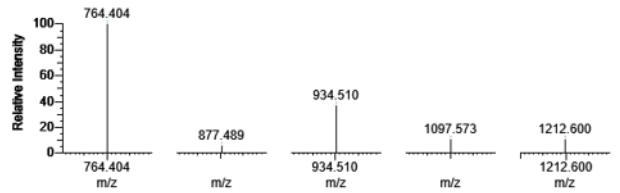

A034 MS-QBIC

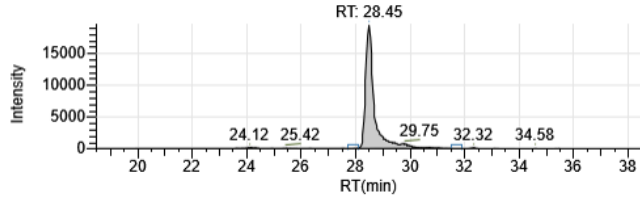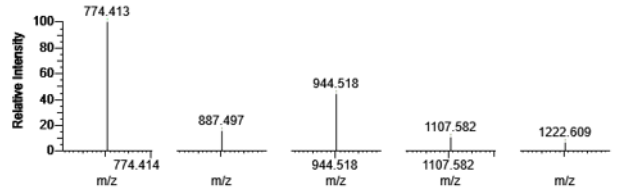

P14  
A038 Sample

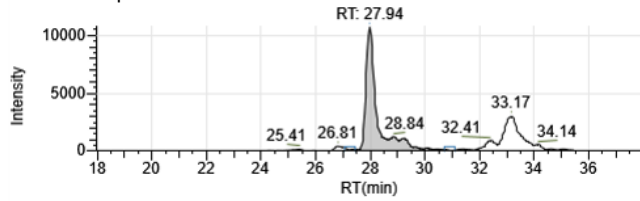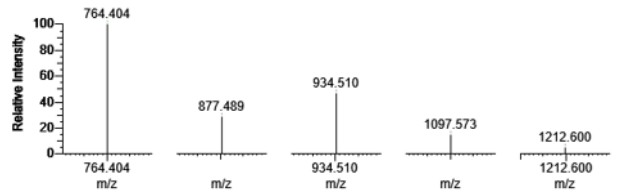

A038 MS-QBIC

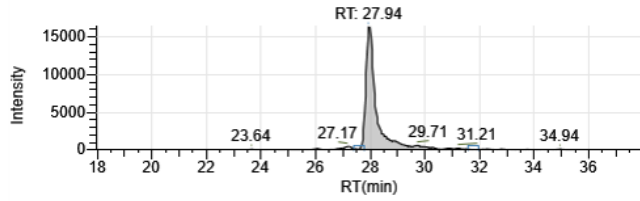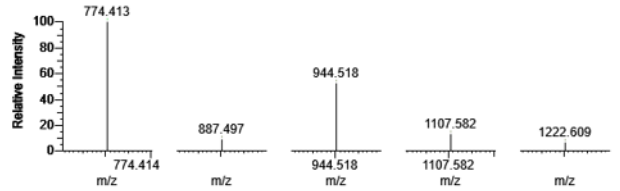

P15  
A087 Sample

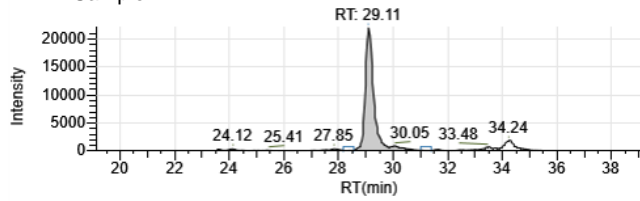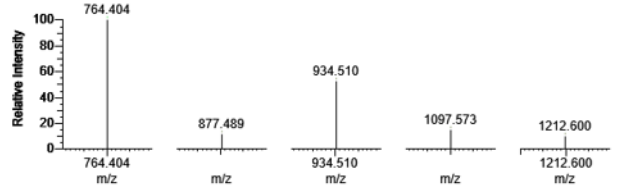

A087 MS-QBIC

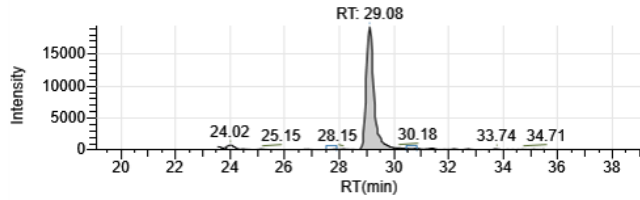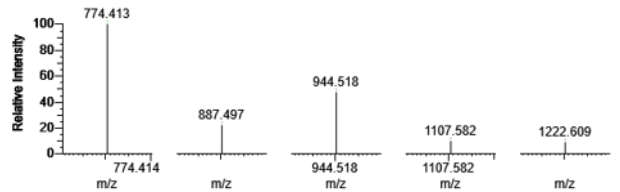

P16  
A089 Sample

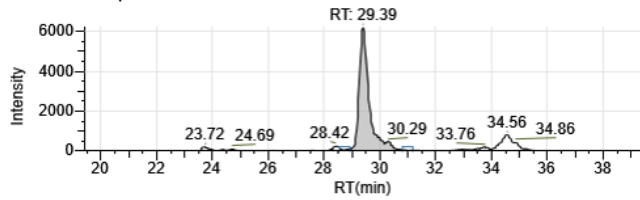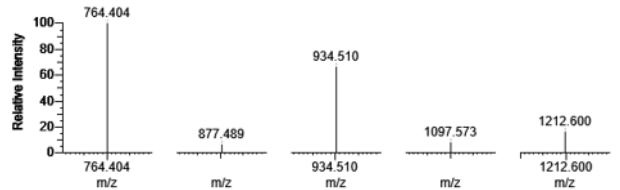

A089 MS-QBIC

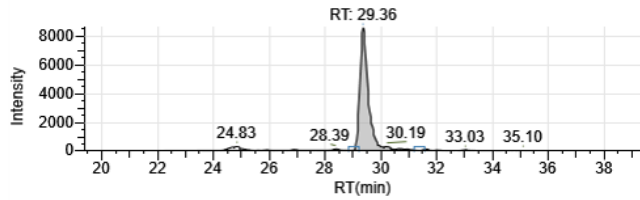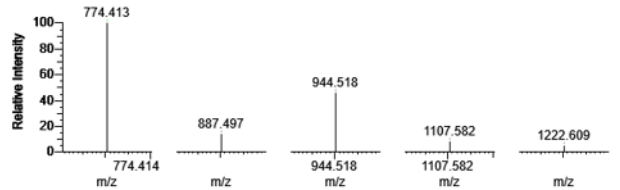

P17  
A046 Sample

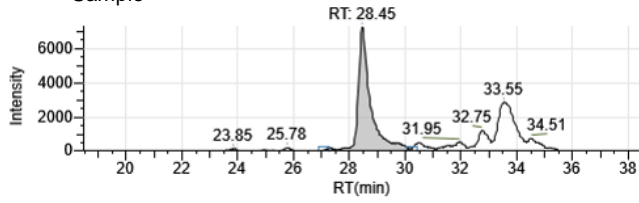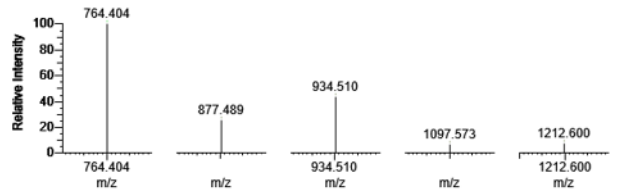

A046 MS-QBIC

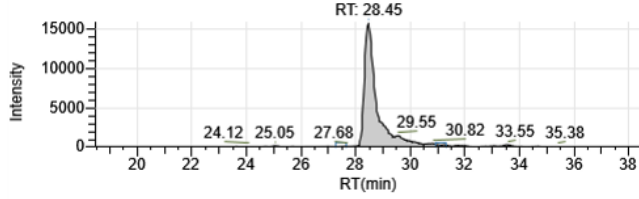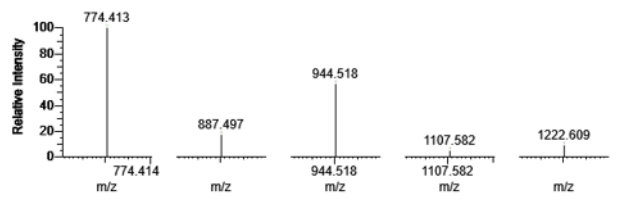

P18  
A050 Sample

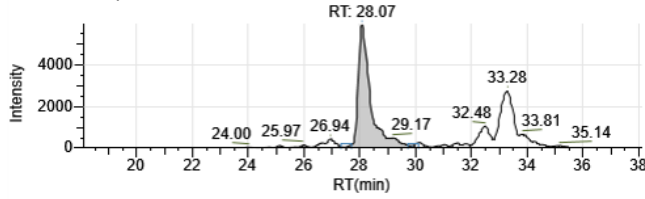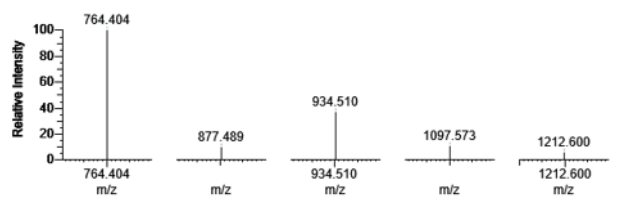

A050 MS-QBIC

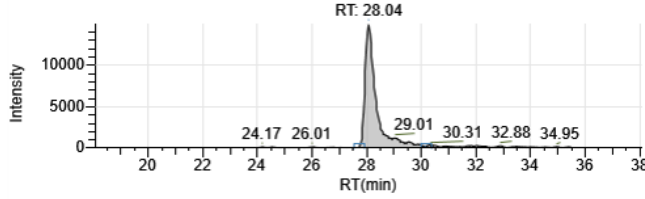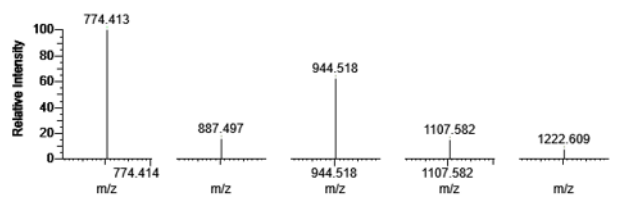

P19  
A053 Sample

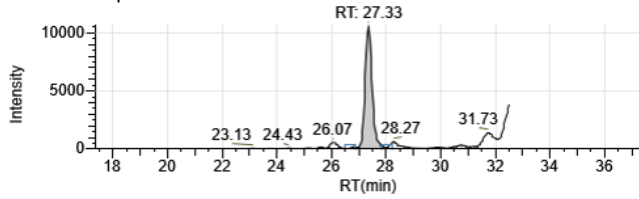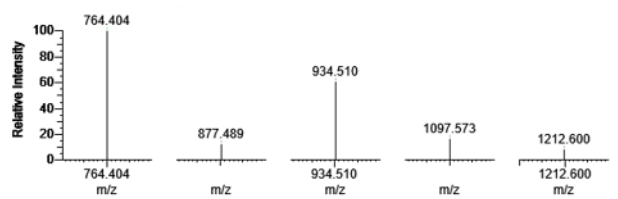

A053 MS-QBIC

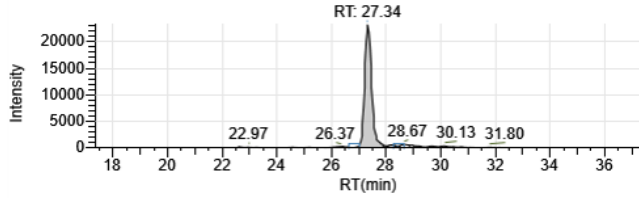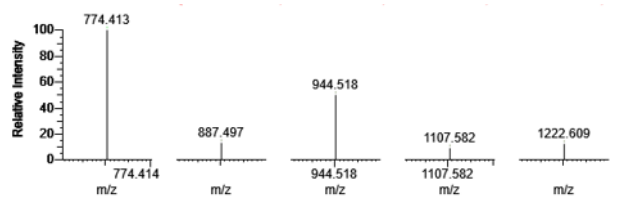

P20  
A062 Sample

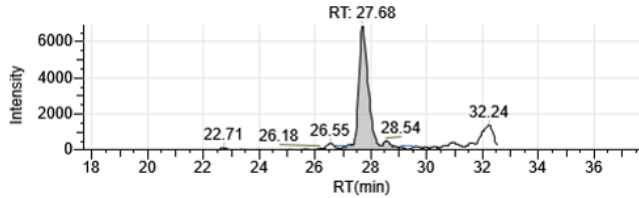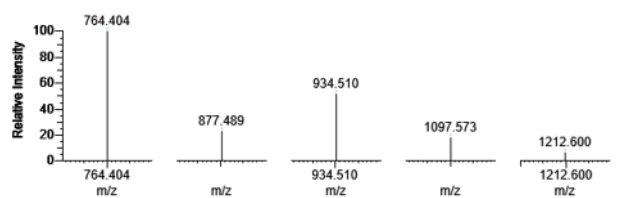

A062 MS-QBIC

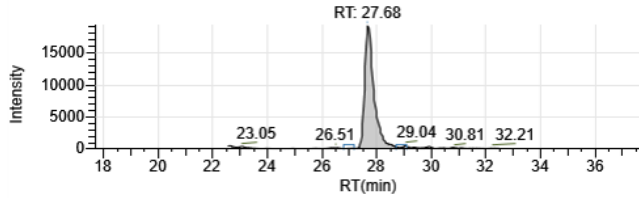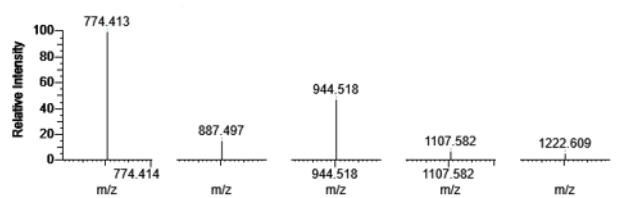

P21  
A064

Sample

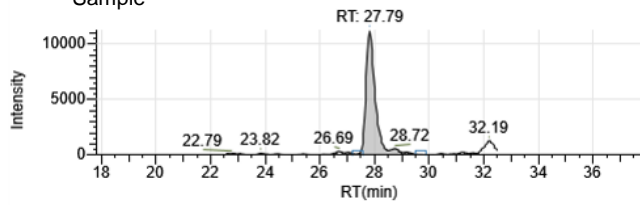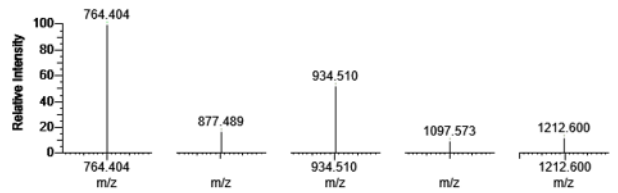

A064 MS-QBIC

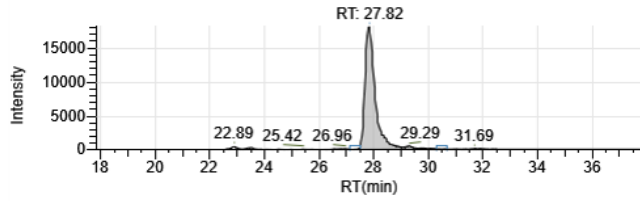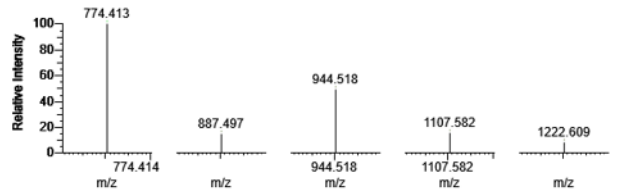

P22  
A041

Sample

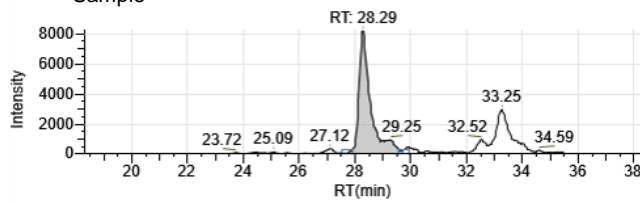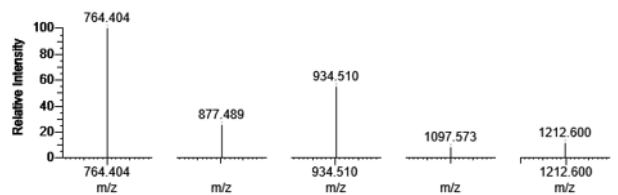

A041 MS-QBIC

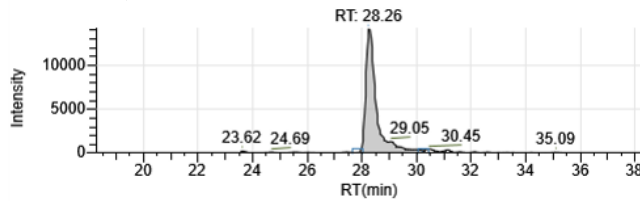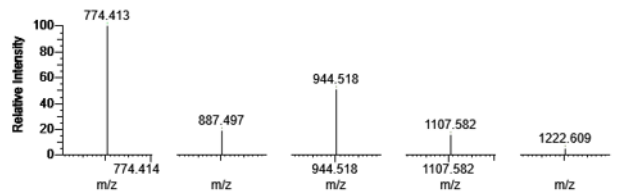

P23  
A082

Sample

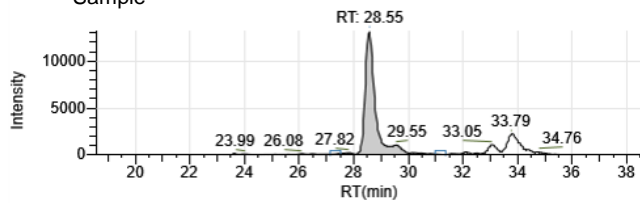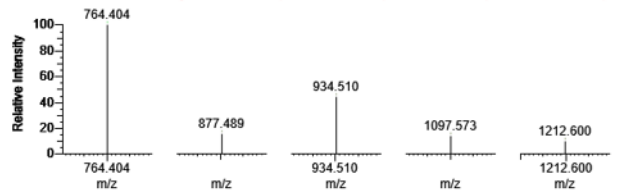

A082 MS-QBIC

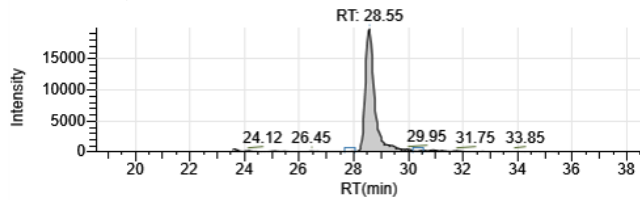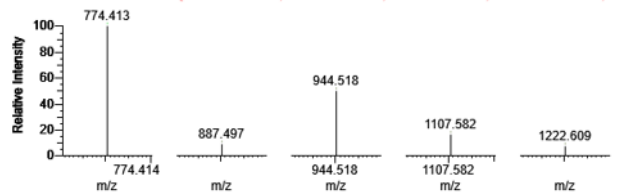

P24  
A070

Sample

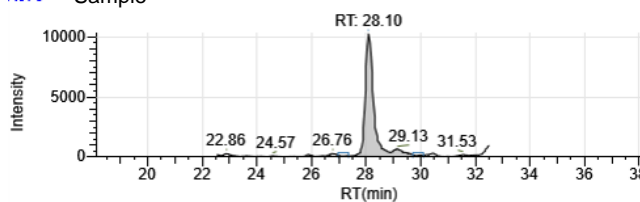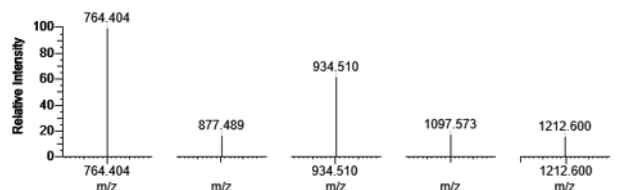

A070 MS-QBIC

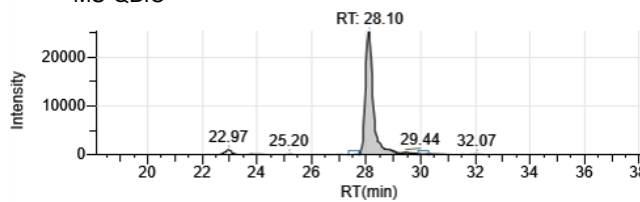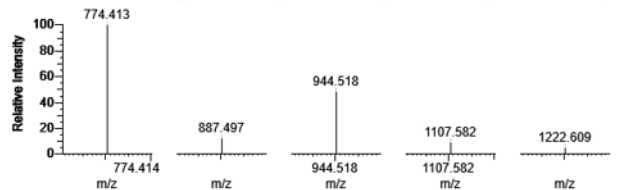

P25  
A073

Sample

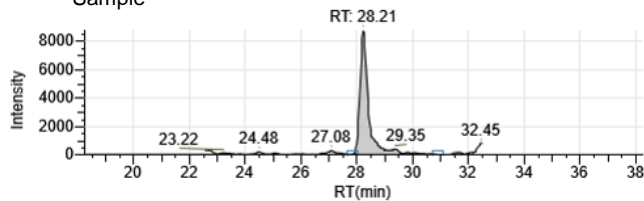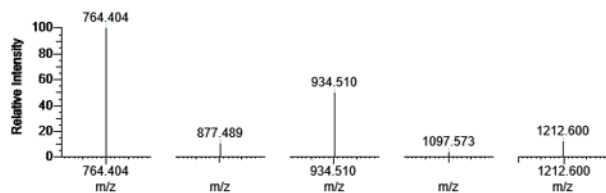

A073 MS-QBIC

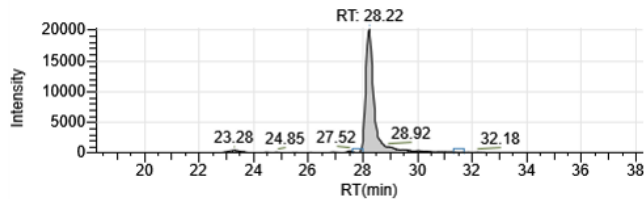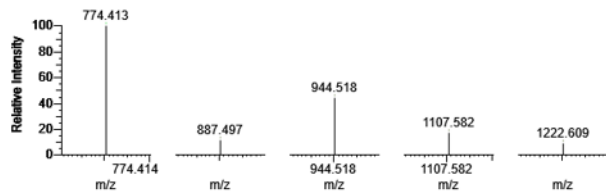

P26

A043

Sample

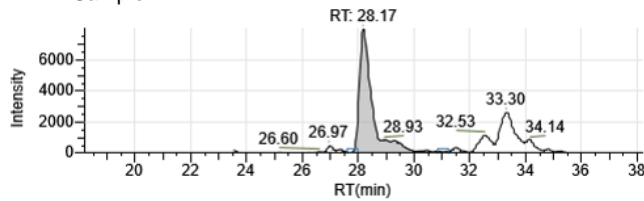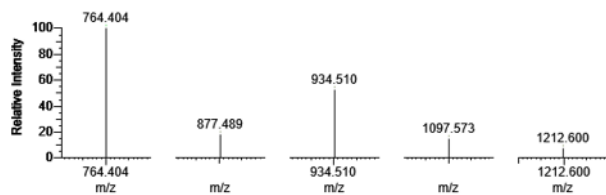

A043 MS-QBIC

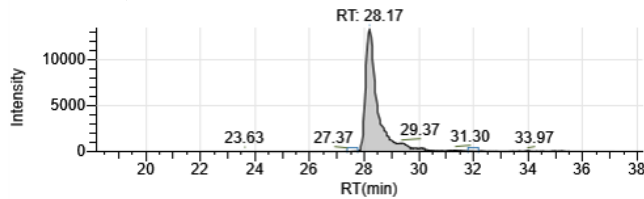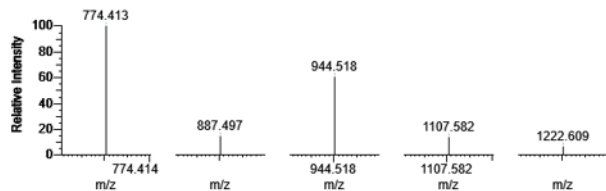

P27

A059

Sample

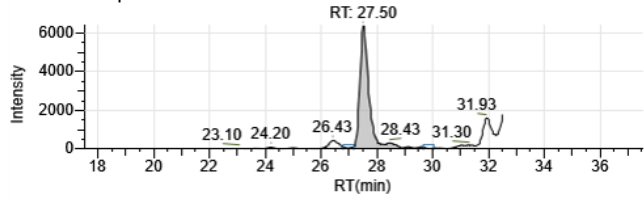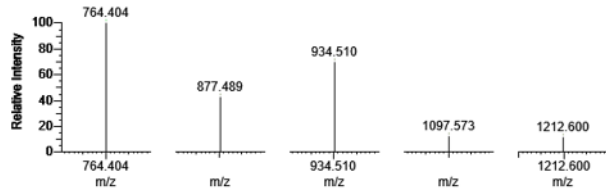

A059 MS-QBIC

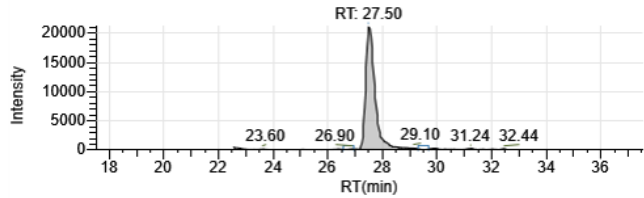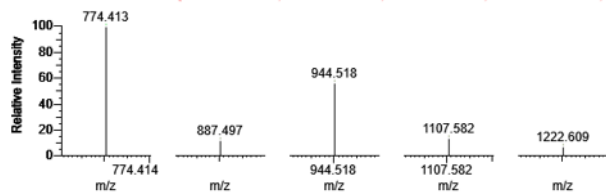

P28

A067

Sample

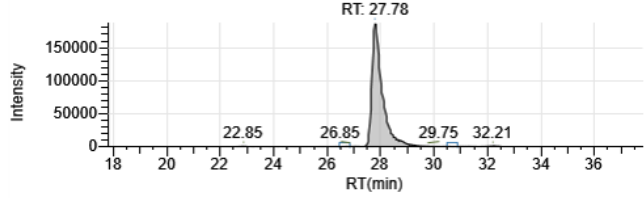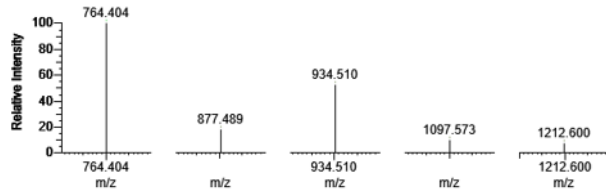

A067 MS-QBIC

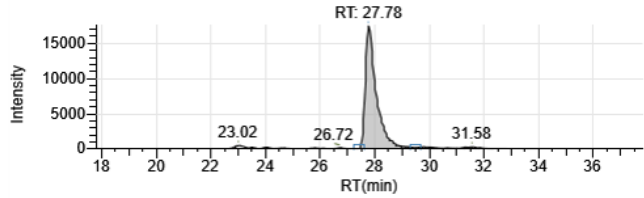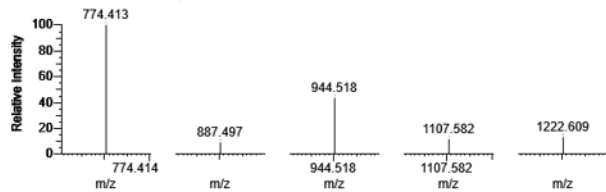

P29

A056

Sample

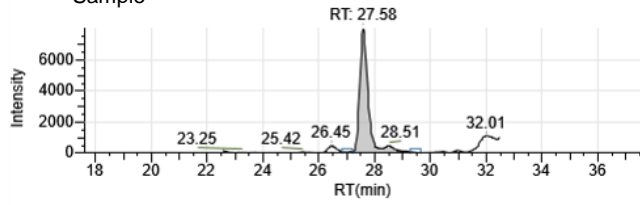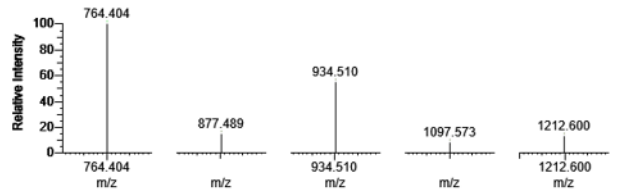

A056

MS-QBIC

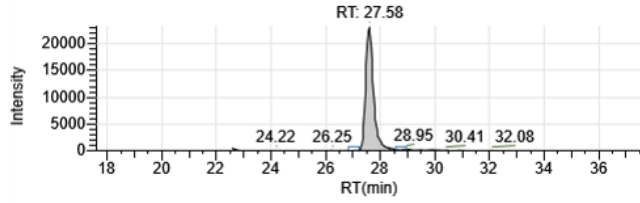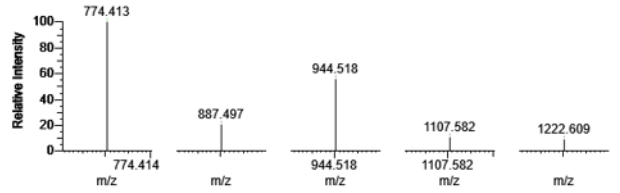

P30

A079

Sample

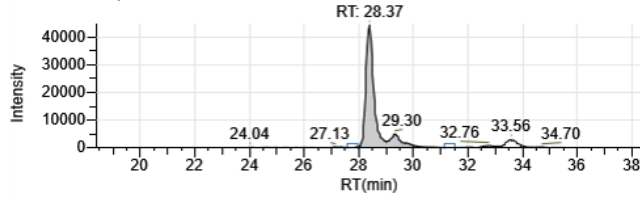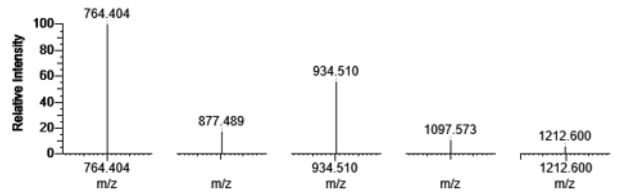

A079

MS-QBIC

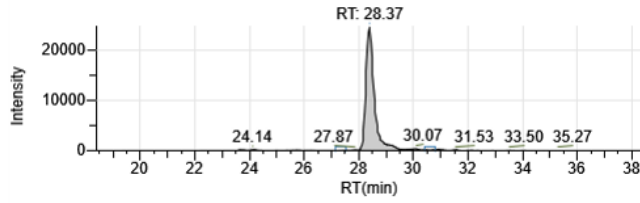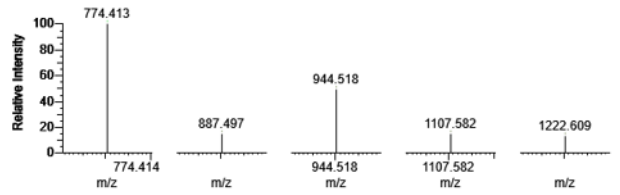



# M SAA (EANYIGSDK) Another organ

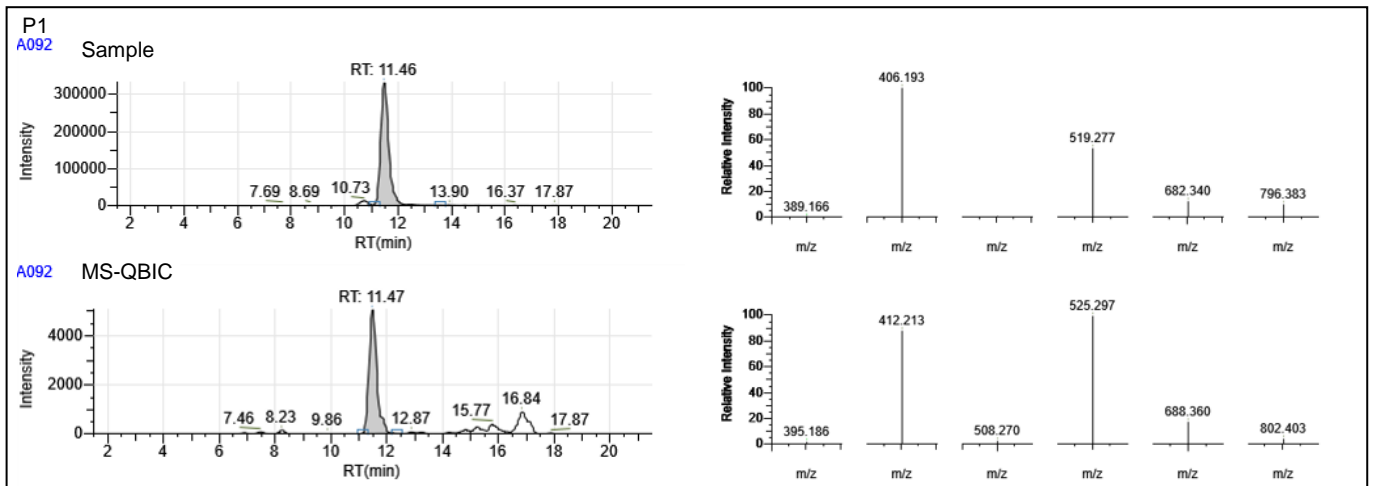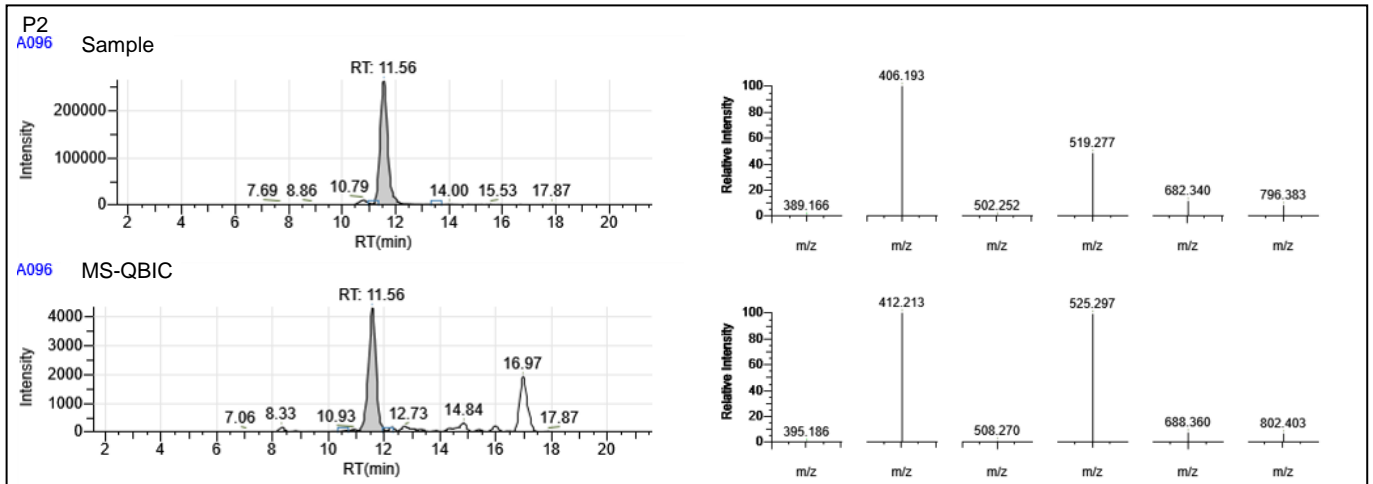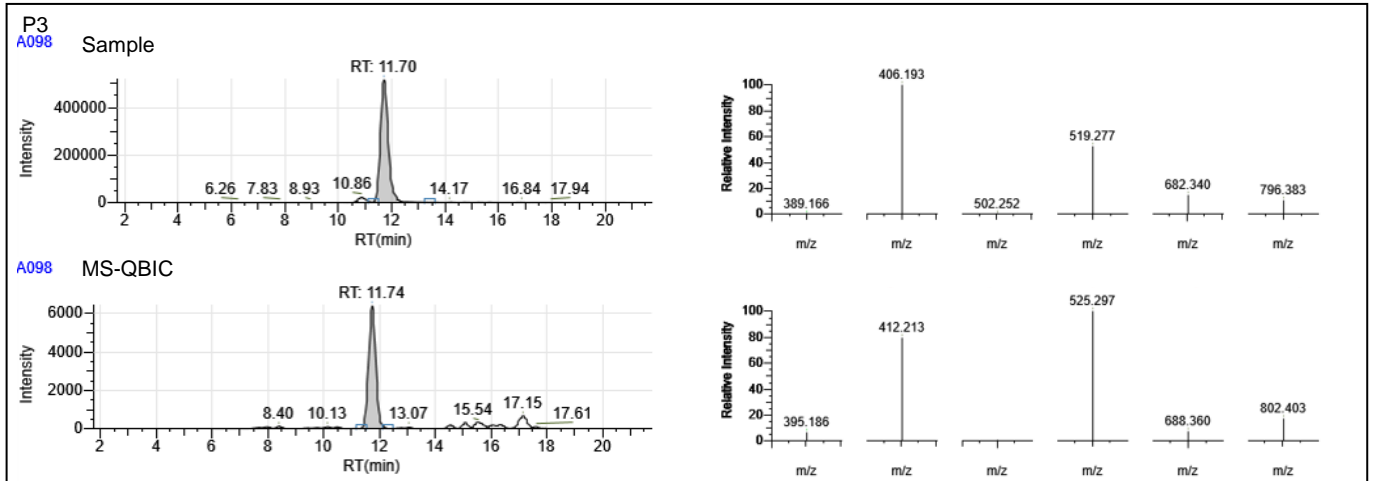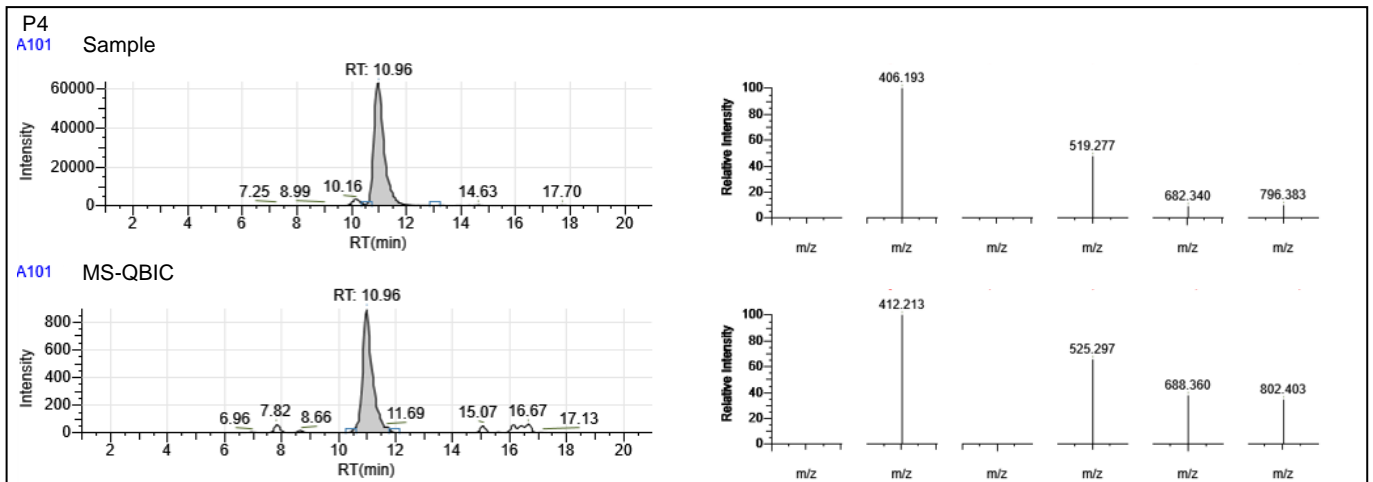

P5  
A103

Sample

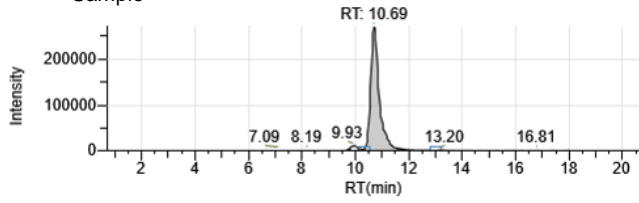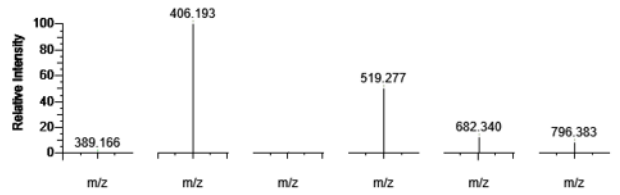

A103 MS-QBIC

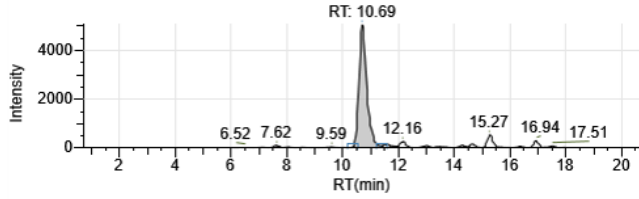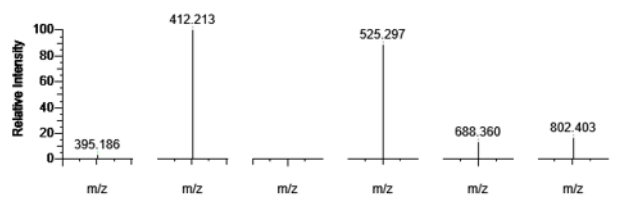

P6  
A107

Sample

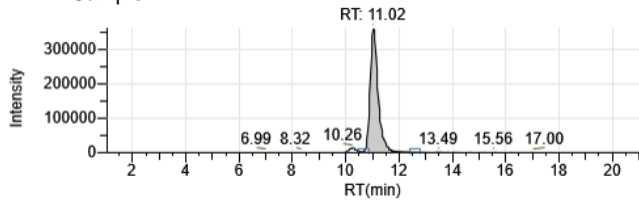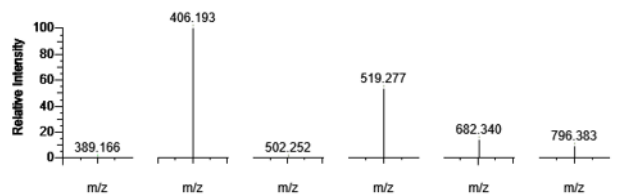

A107 MS-QBIC

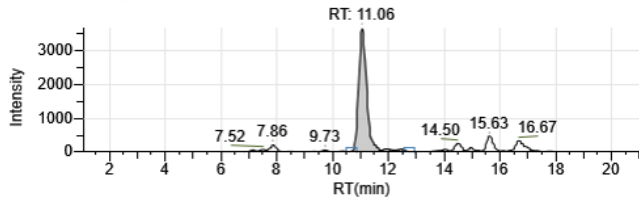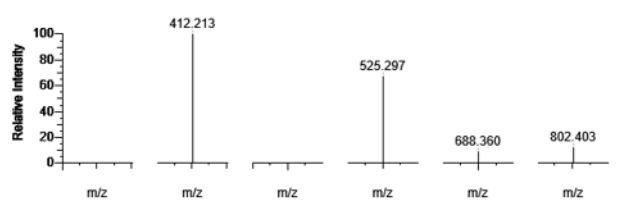

P7  
A161

Sample

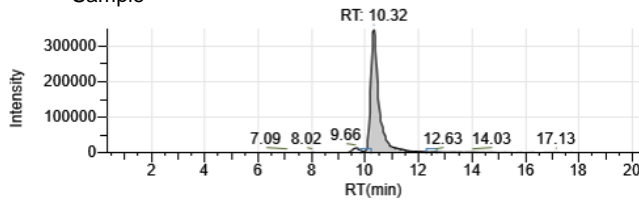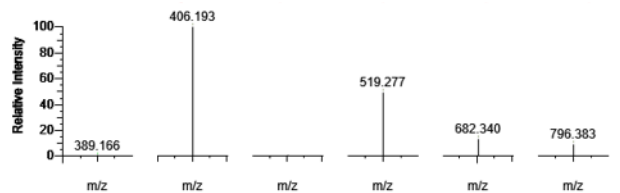

A161 MS-QBIC

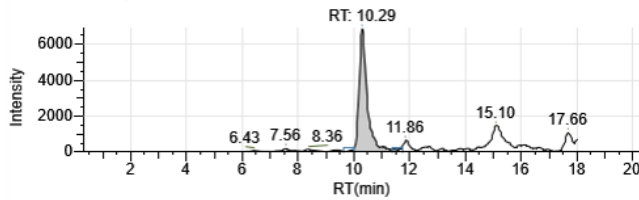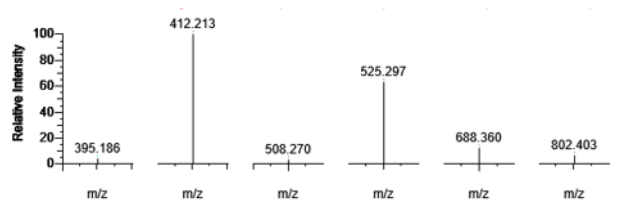

P8  
A109

Sample

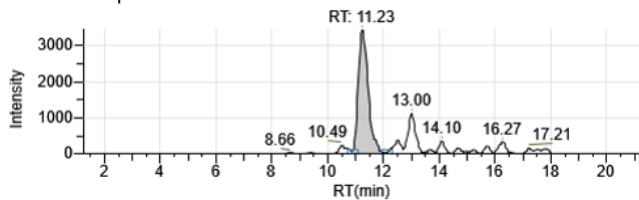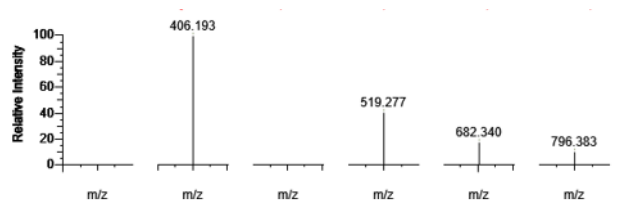

A109 MS-QBIC

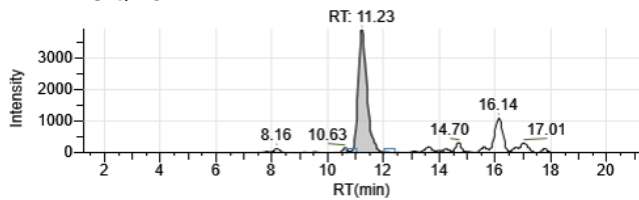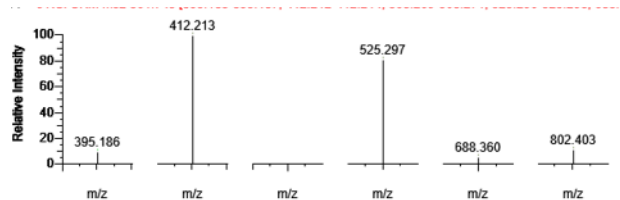

P18  
A134 Sample

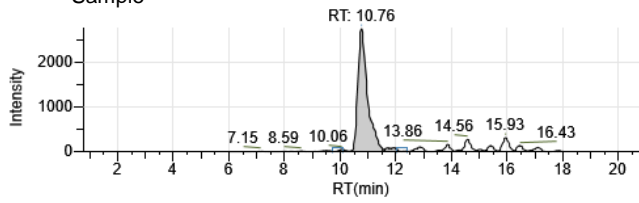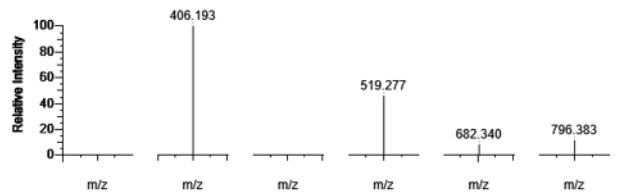

A134 MS-QBIC

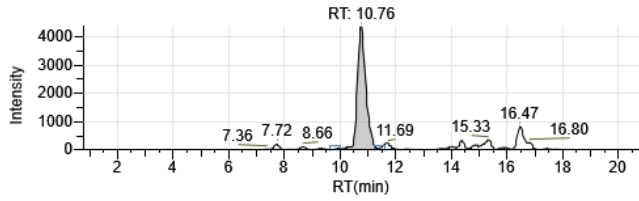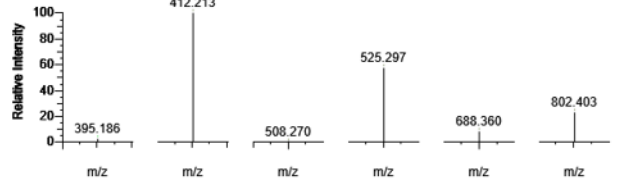

P21  
A149 Sample

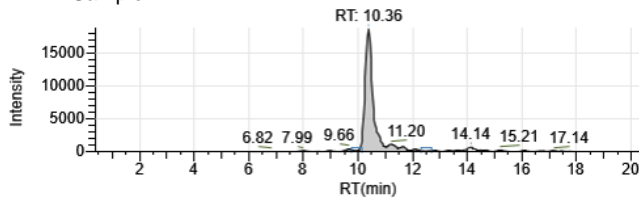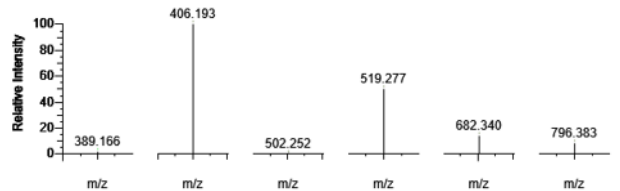

A149 MS-QBIC

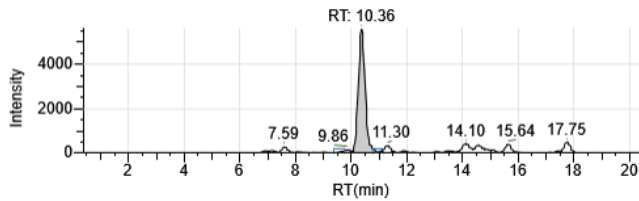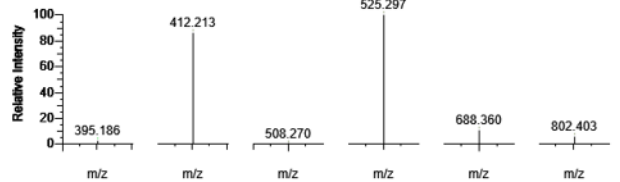

P22  
A126 Sample

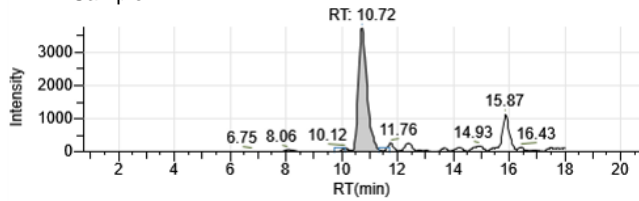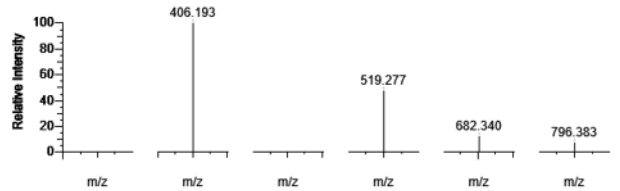

A126 MS-QBIC

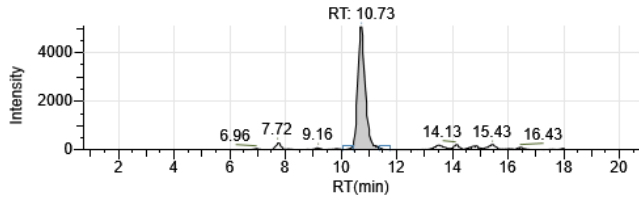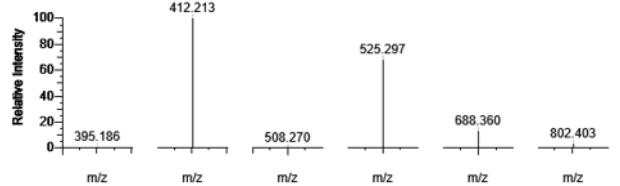

P23  
A168 Sample

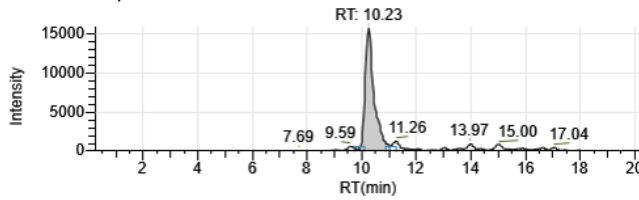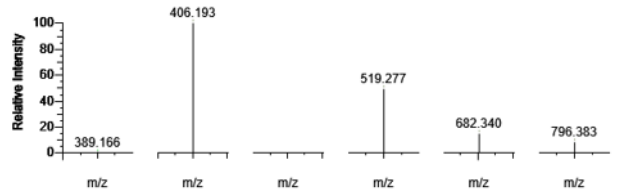

A168 MS-QBIC

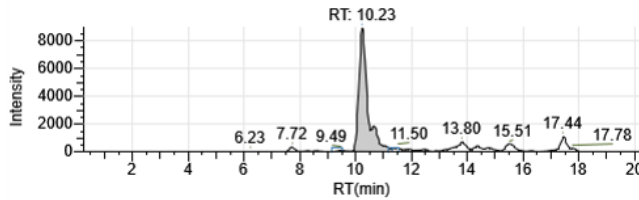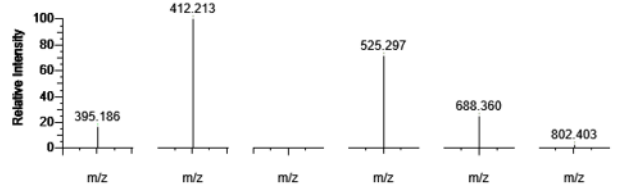

P26  
A128 Sample

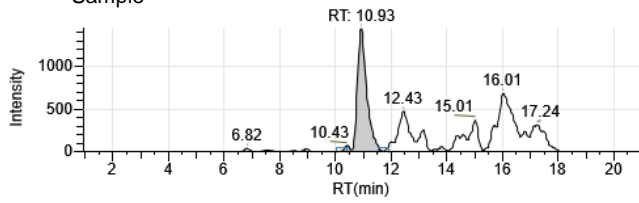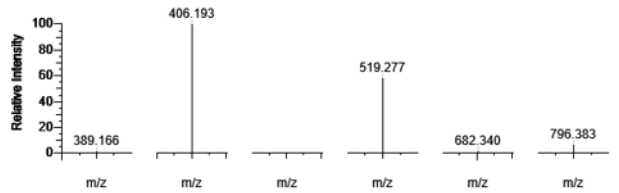

A128 MS-QBIC

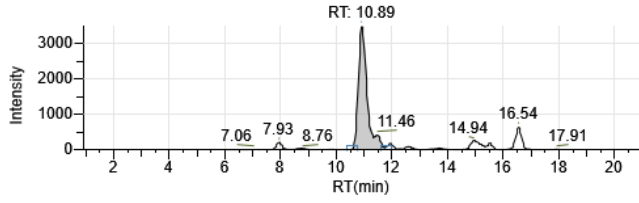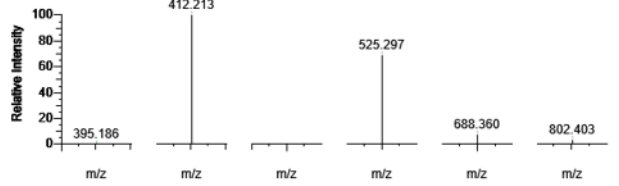

P30  
A163 Sample

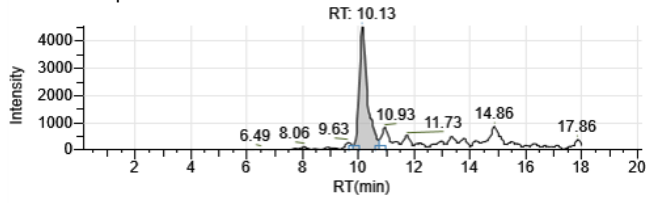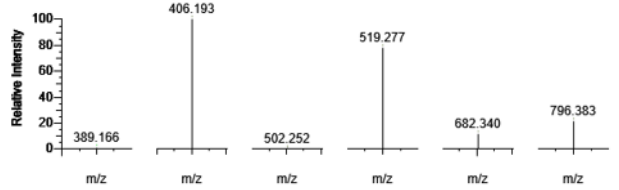

A163 MS-QBIC

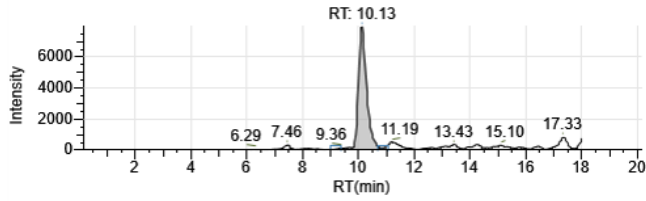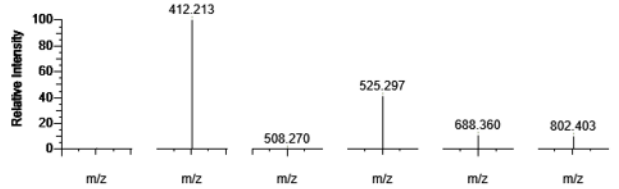

# N. TTR (AADDTWEPFASGK) Another organ

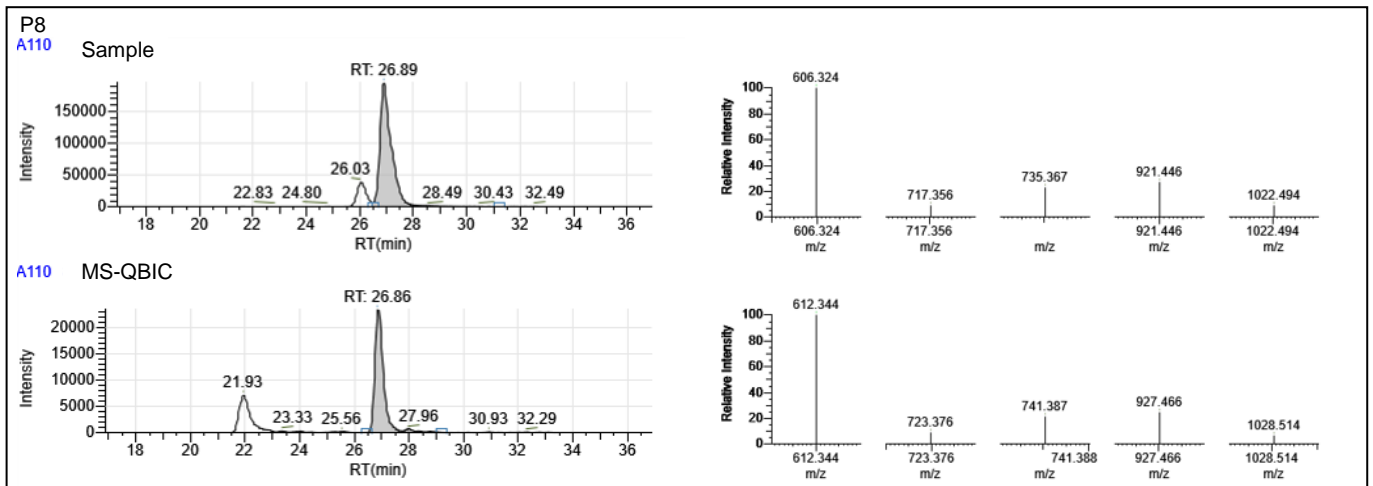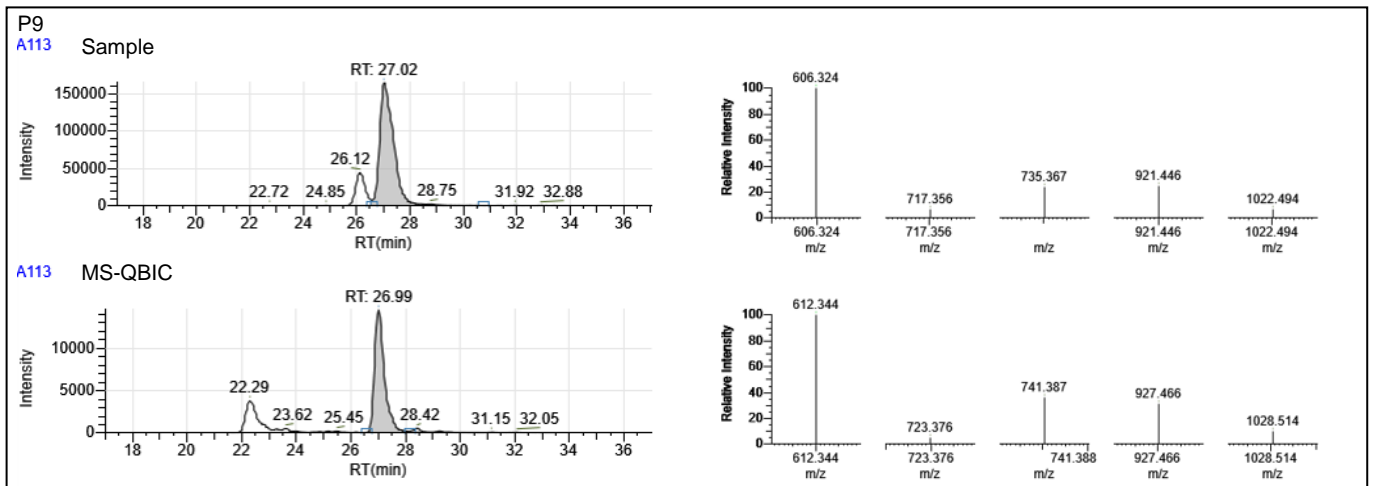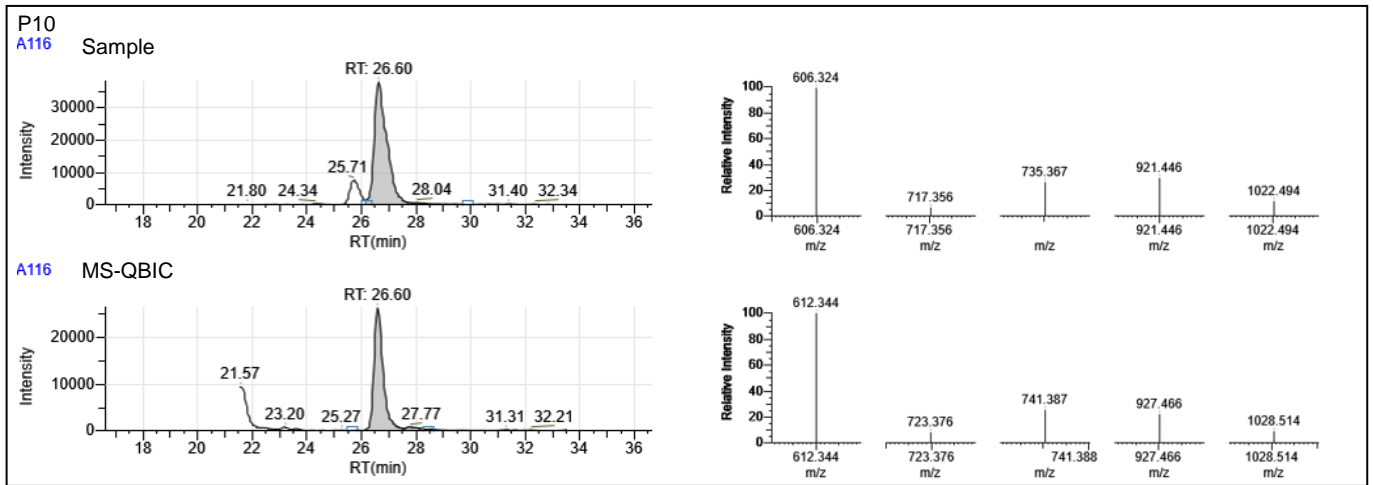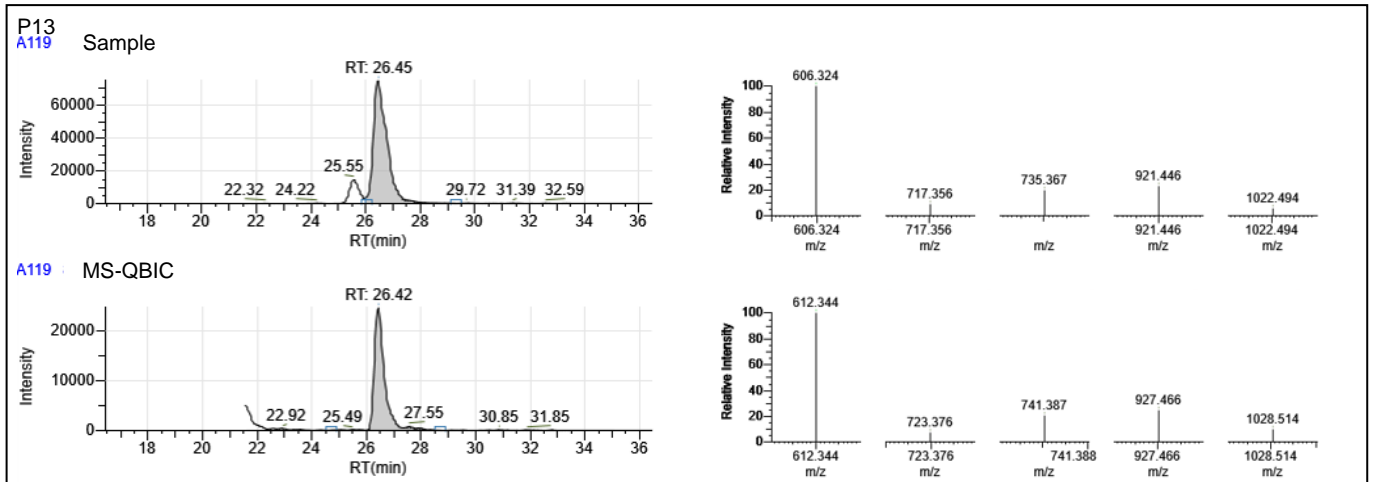

P14  
A122 Sample

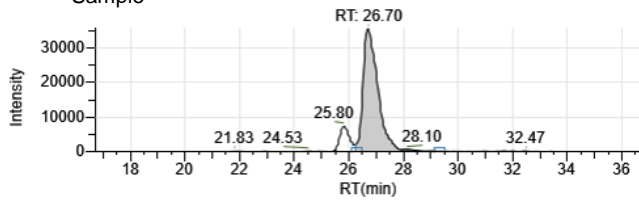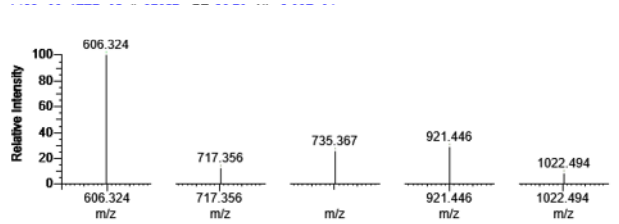

A122 MS-QBIC

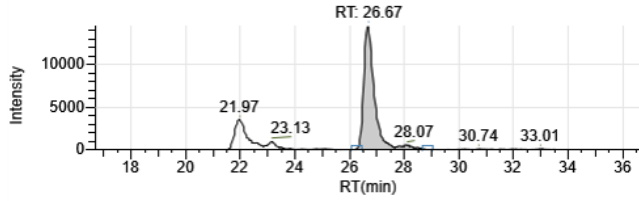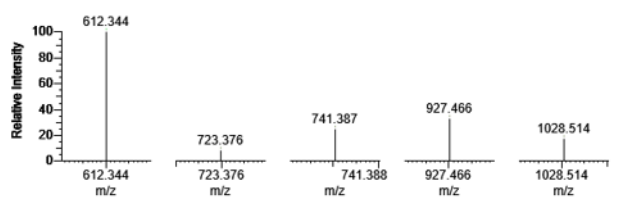

P15  
A170 Sample

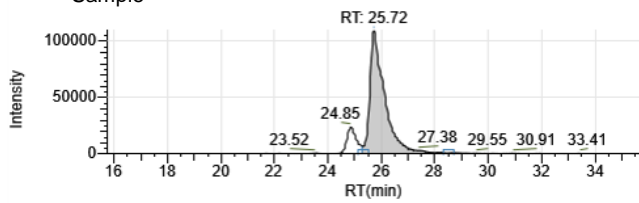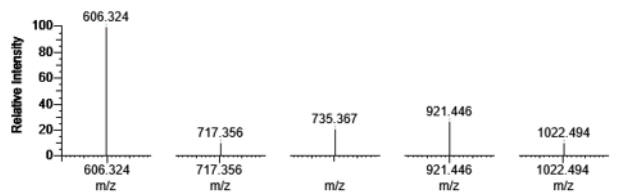

A170 MS-QBIC

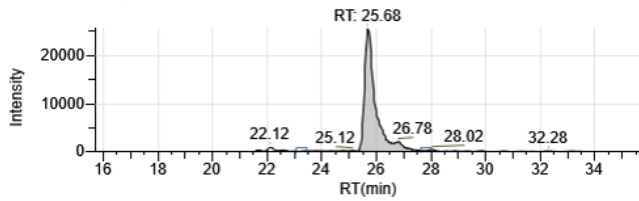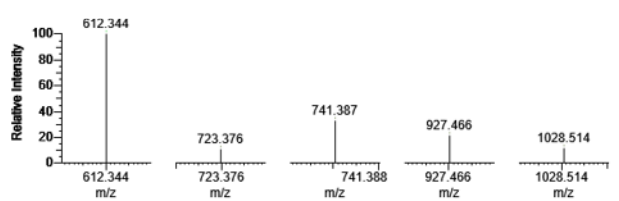

P16  
A173 Sample

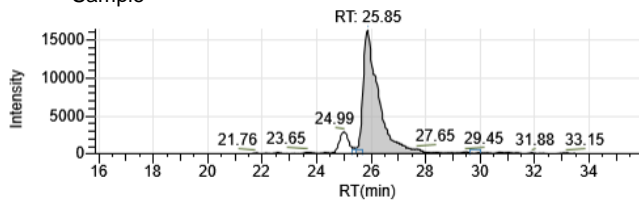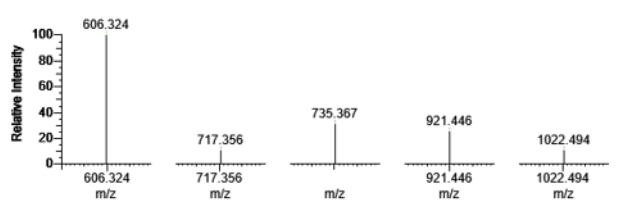

A173 MS-QBIC

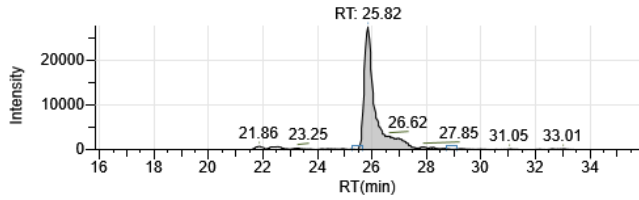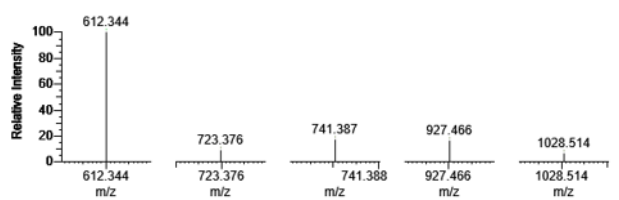

P19  
A137 Sample

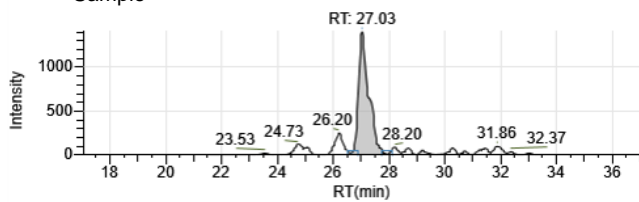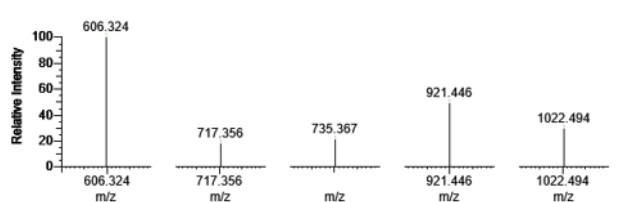

A137 MS-QBIC

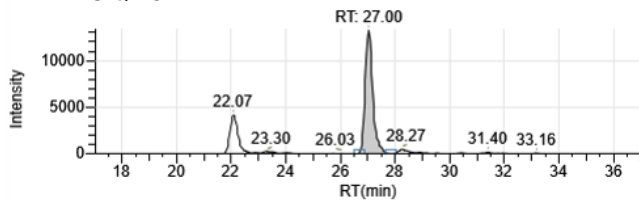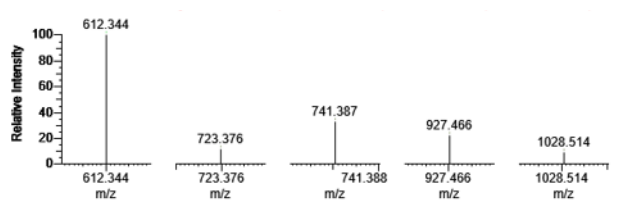

P20  
A147

Sample

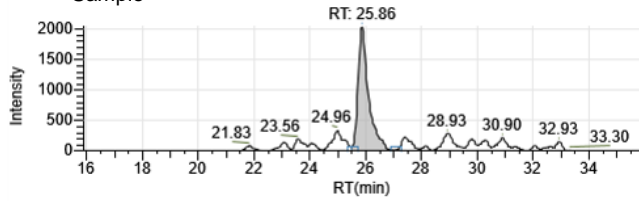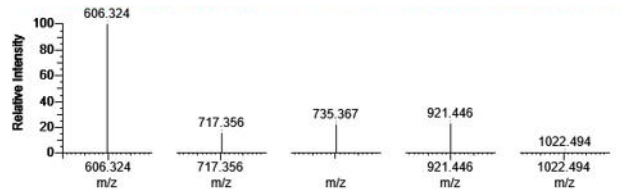

A147 MS-QBIC

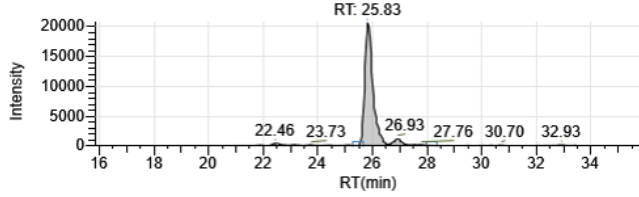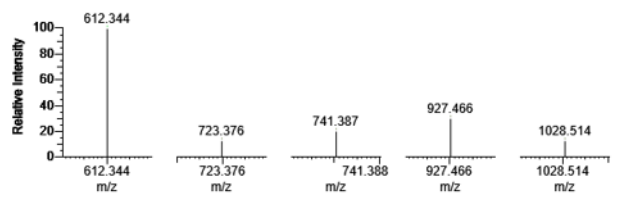

P22  
A125

Sample

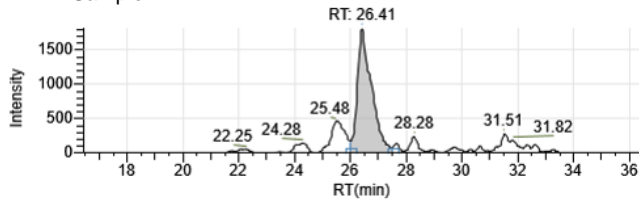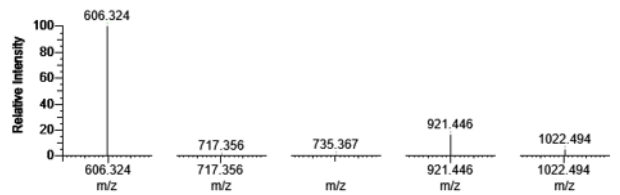

A125 MS-QBIC

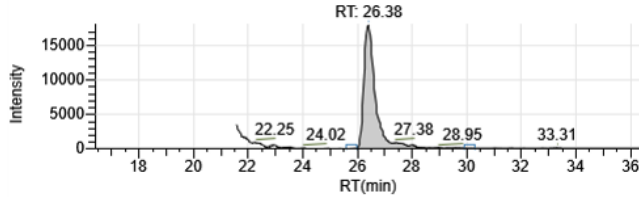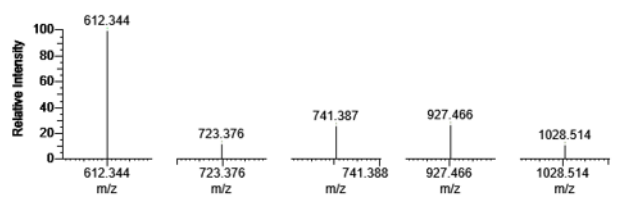

P23  
A168

Sample

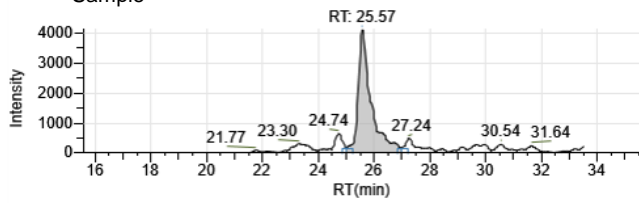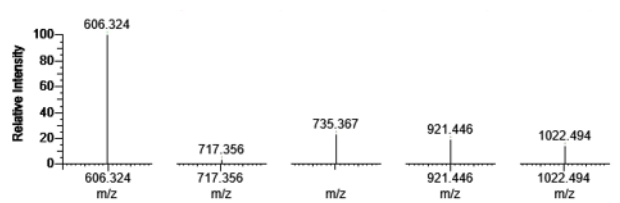

A168 MS-QBIC

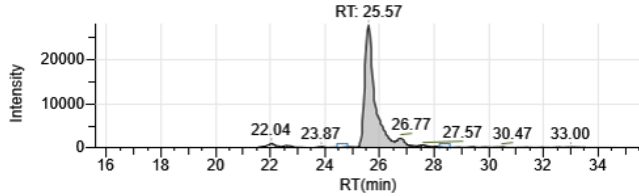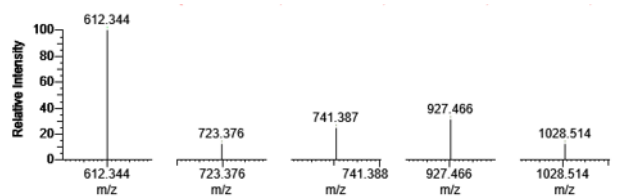

P27  
A144

Sample

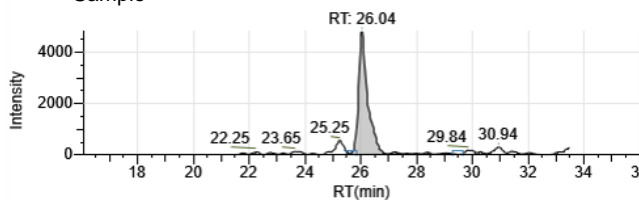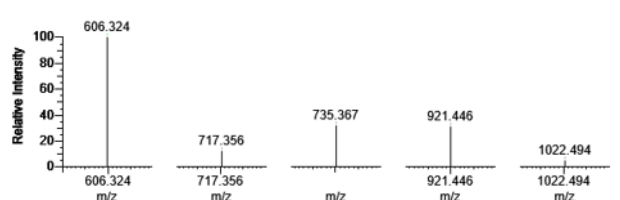

A144 MS-QBIC

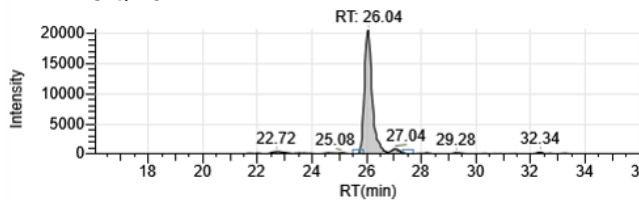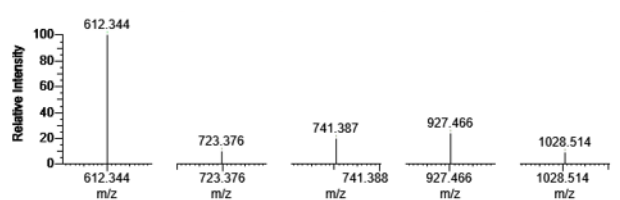



P28  
A153

Sample

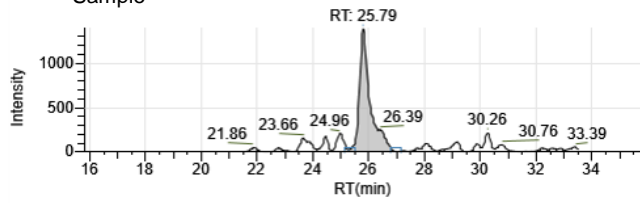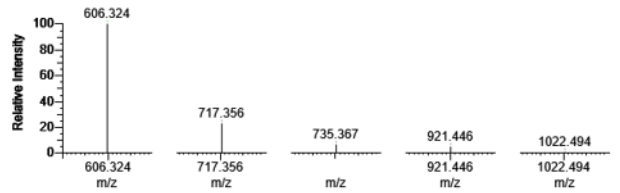

A153 MS-QBIC

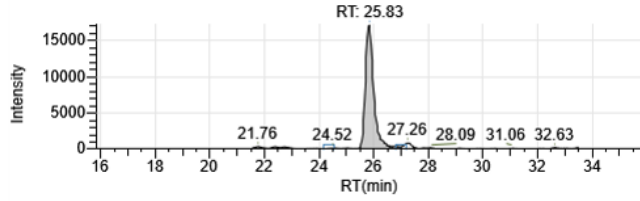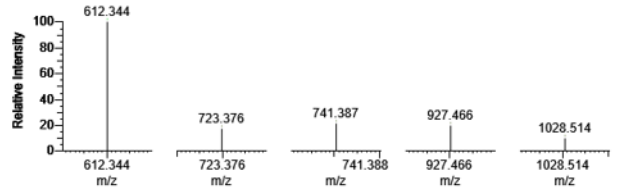

P29  
A140

Sample

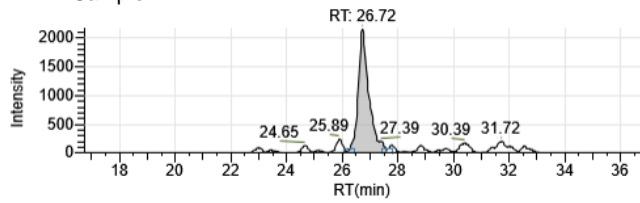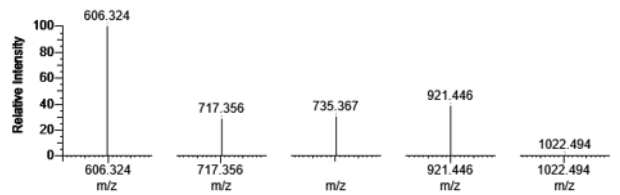

A140 MS-QBIC

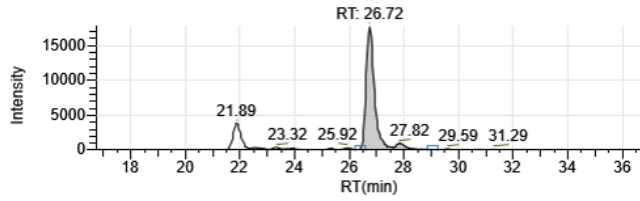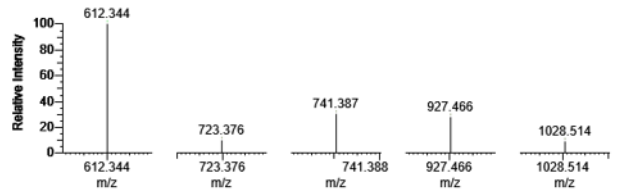

O IGK (TVAAPSVFIFPPSDEQLK) Another organ

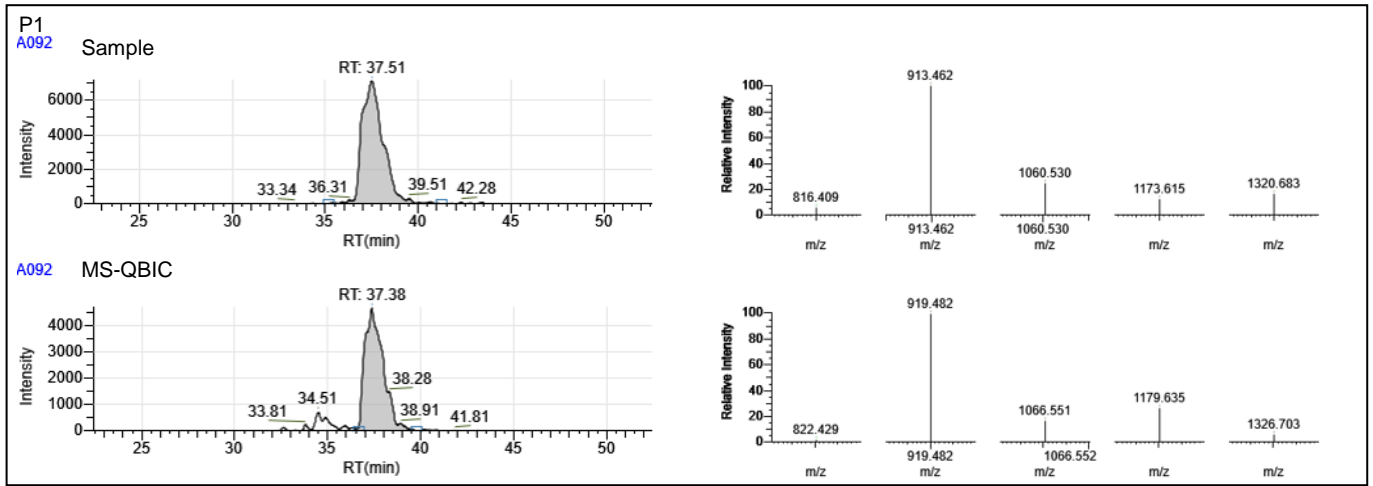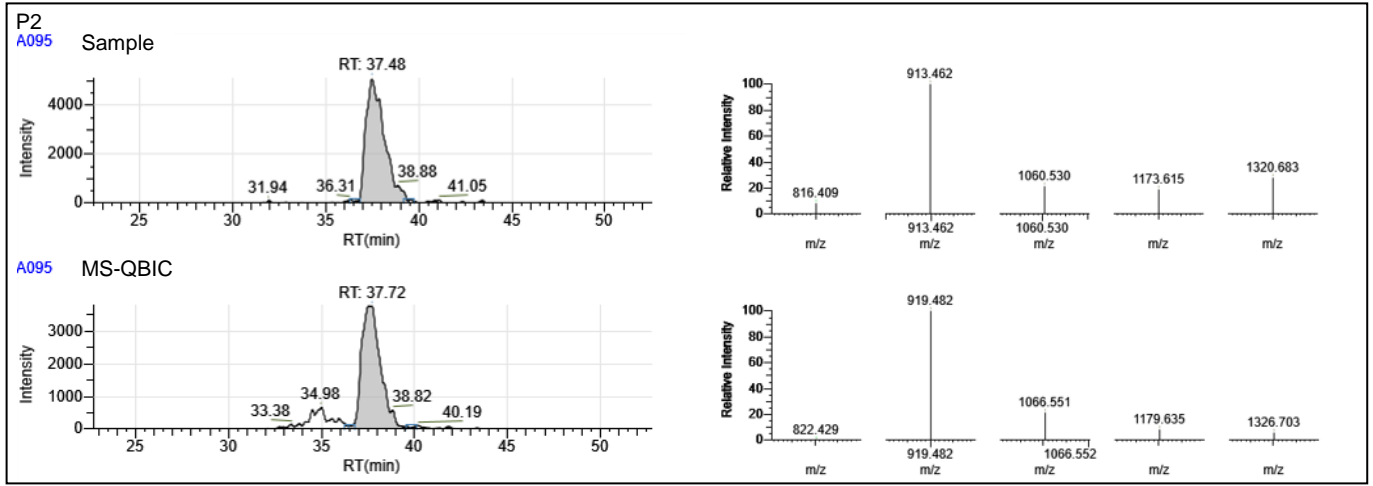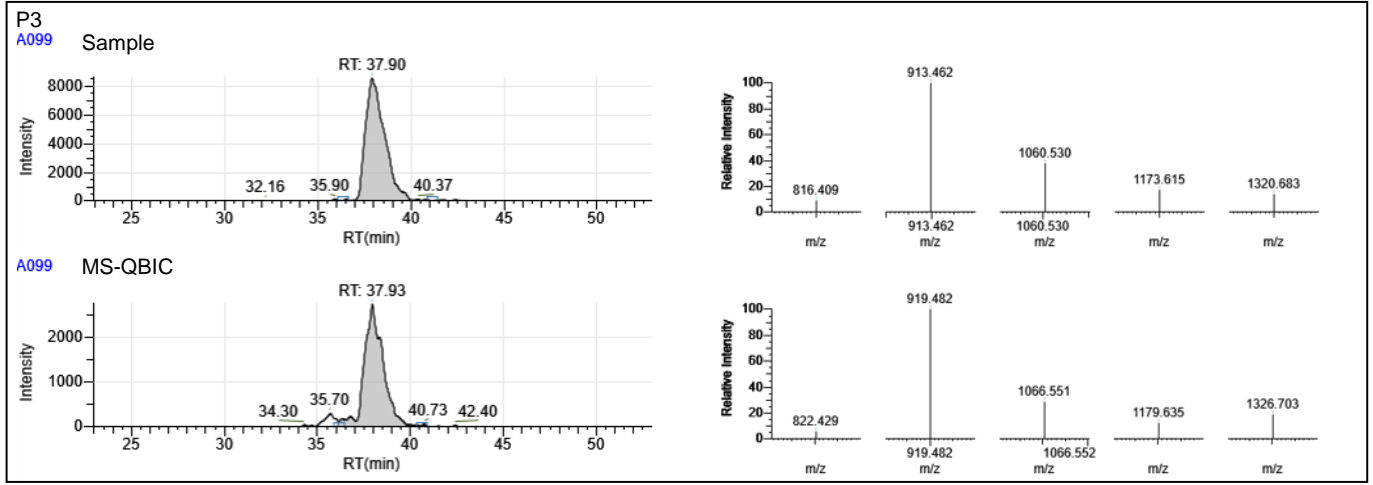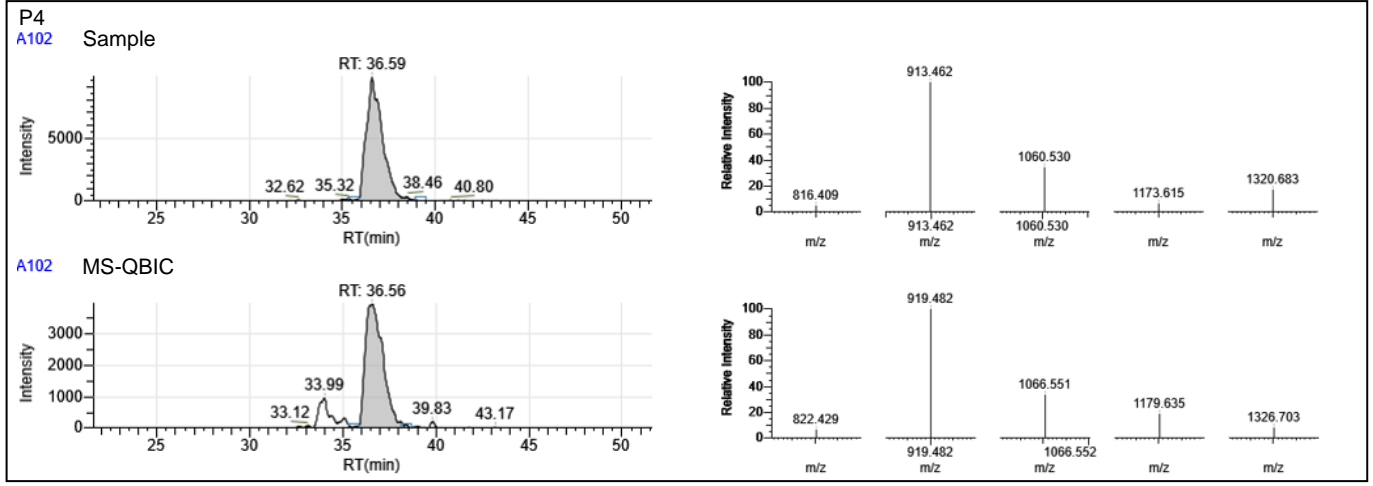

P5  
A103

Sample

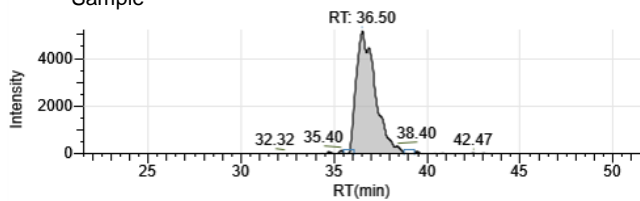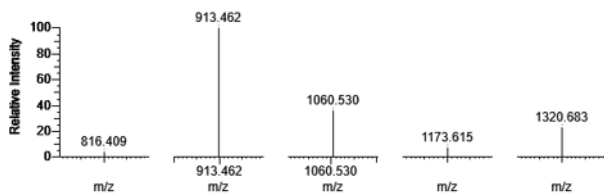

A103

MS-QBIC

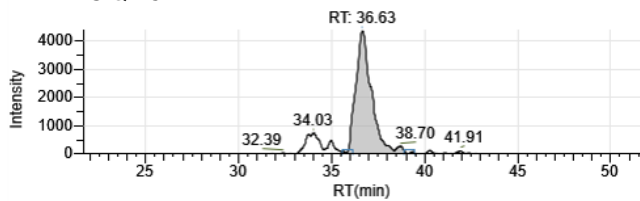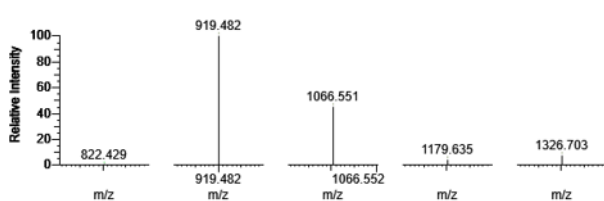

P7

A161

Sample

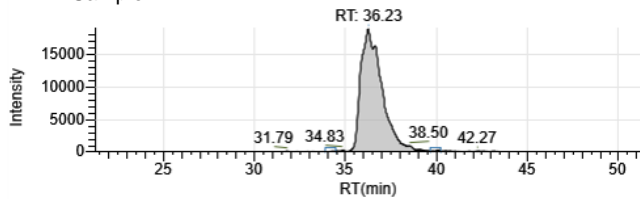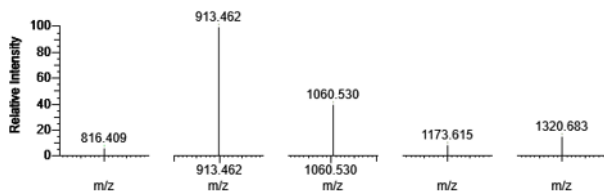

A161

MS-QBIC

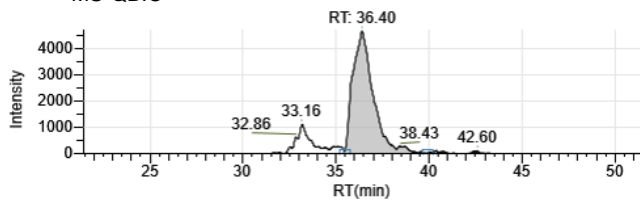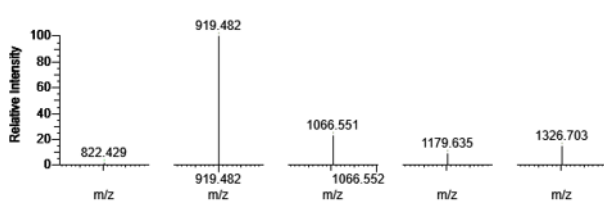

P8

A111

Sample

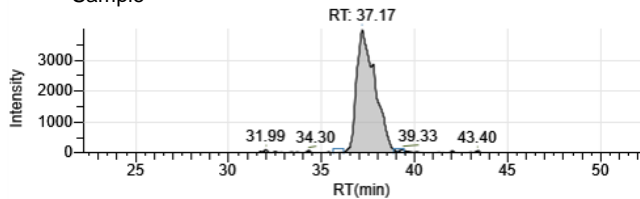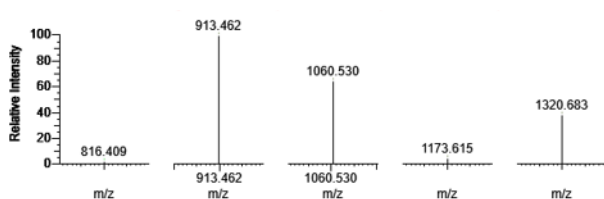

A111

MS-QBIC

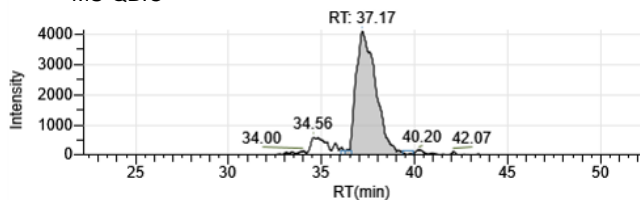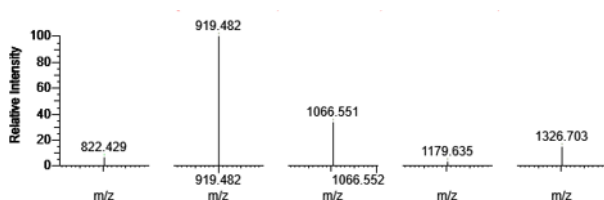

P9

A114

Sample

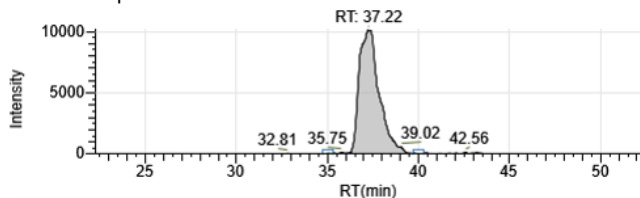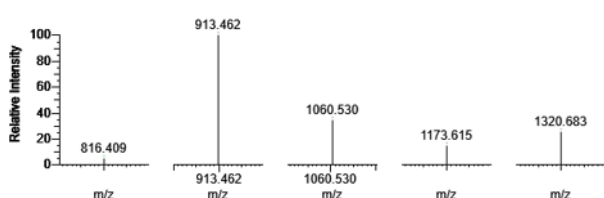

A114

MS-QBIC

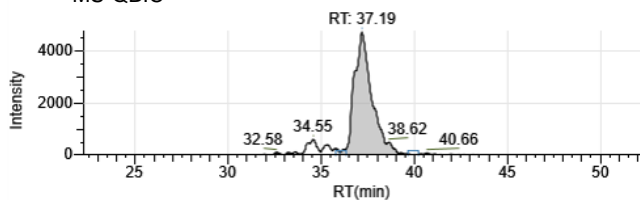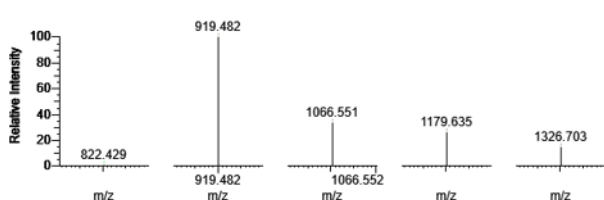

P10  
A116

Sample

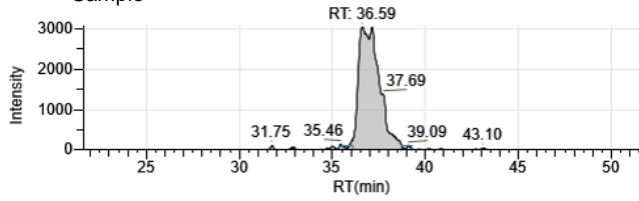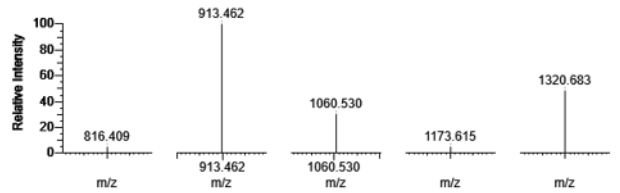

A116 MS-QBIC

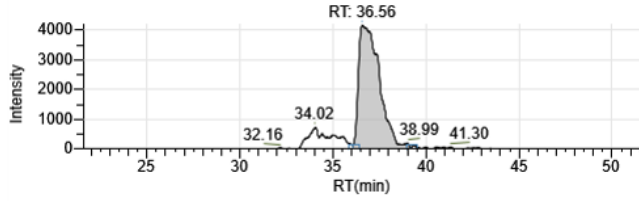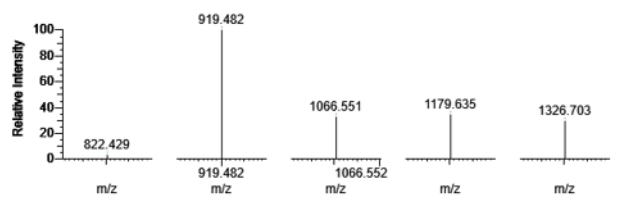

P13  
A119

Sample

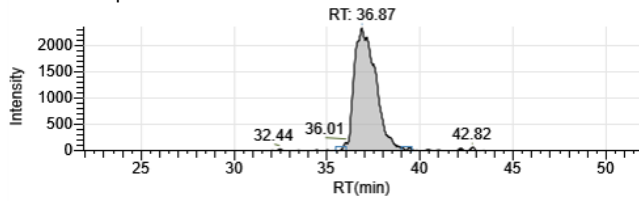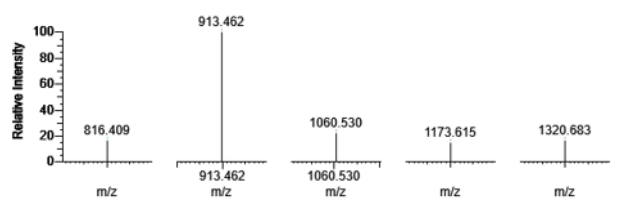

A119 MS-QBIC

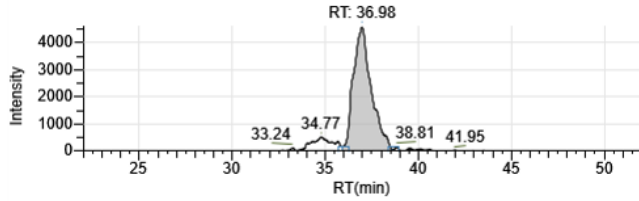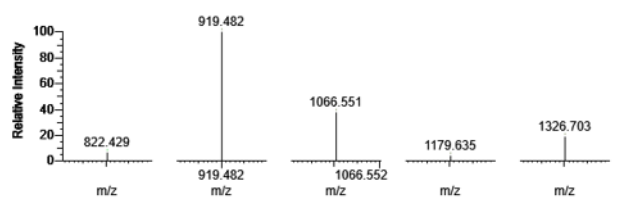

P14  
A123

Sample

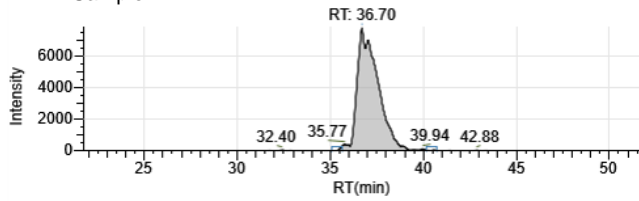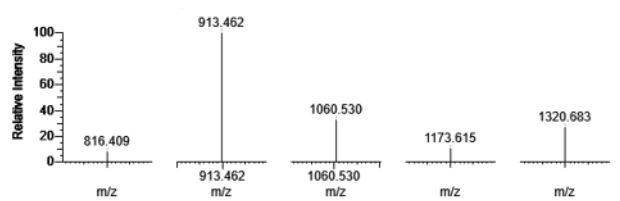

A123 MS-QBIC

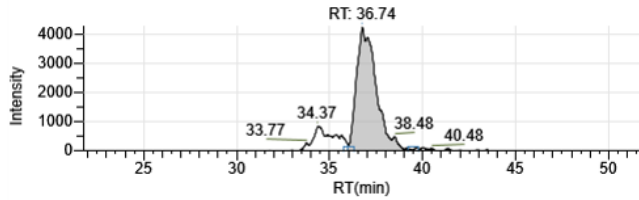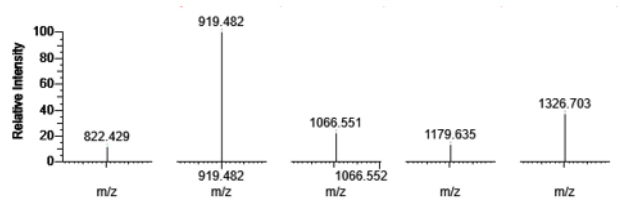

P15  
A169

Sample

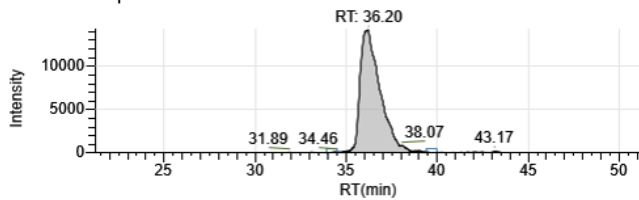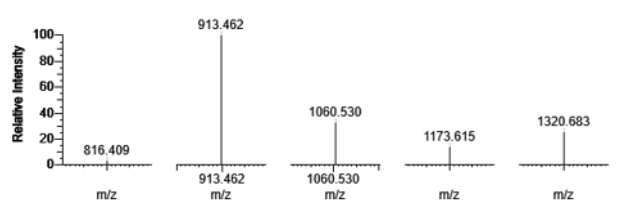

A169 MS-QBIC

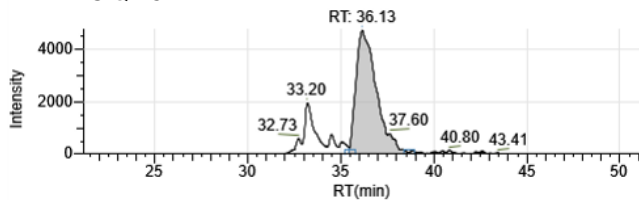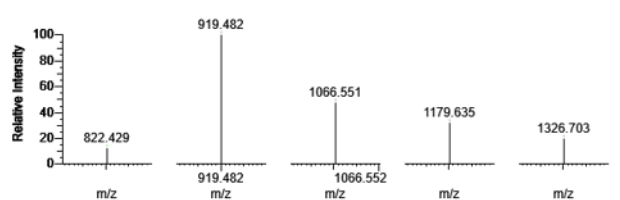

P16  
A173 Sample

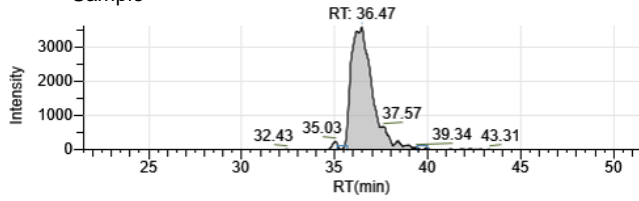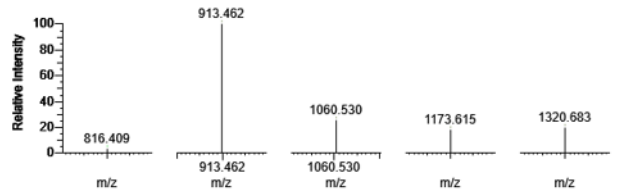

A173 MS-QBIC

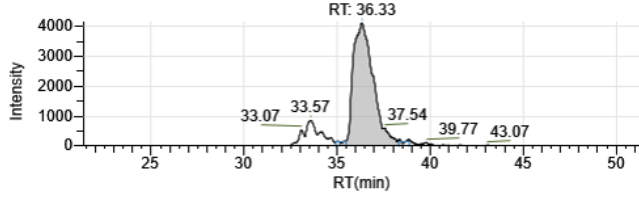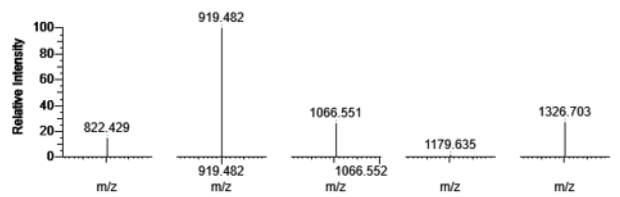

P17  
A131 Sample

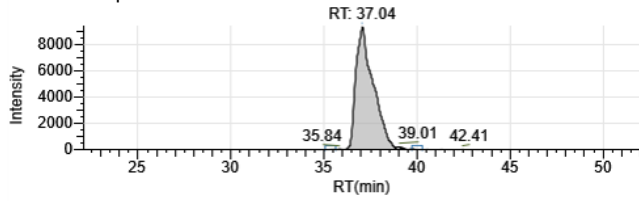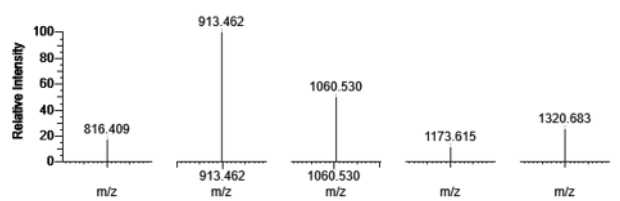

A131 MS-QBIC

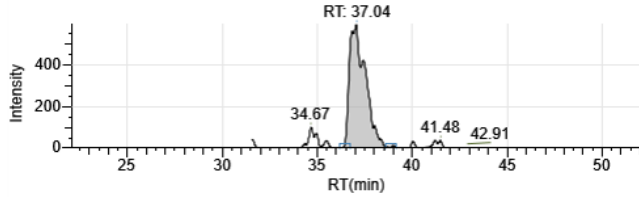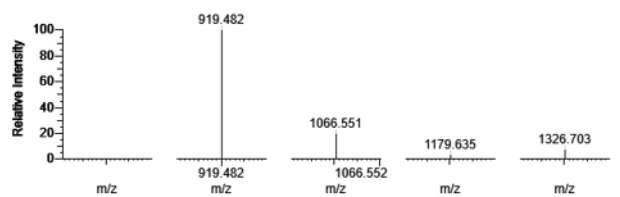

P18  
A134 Sample

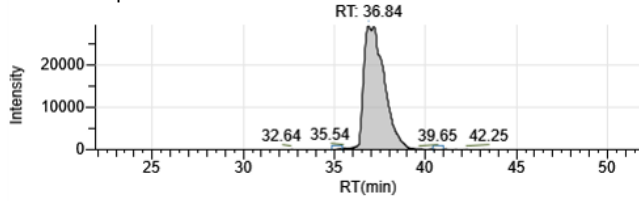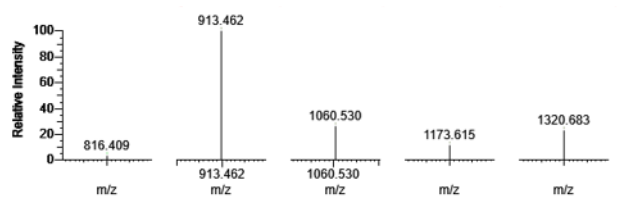

A134 MS-QBIC

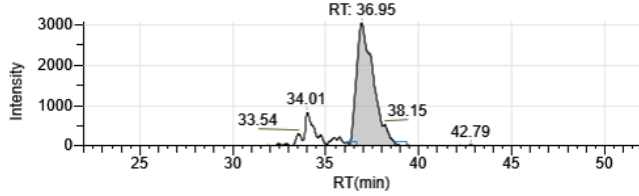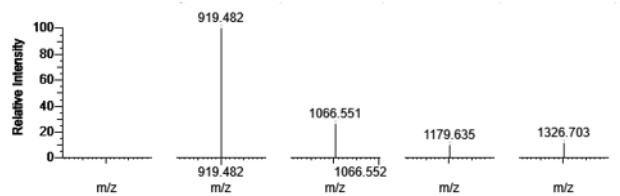

P19  
A136 Sample

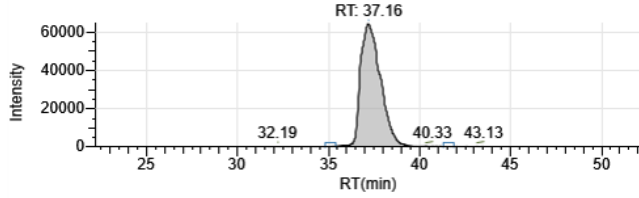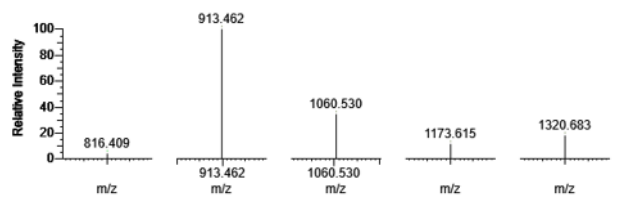

A136 MS-QBIC

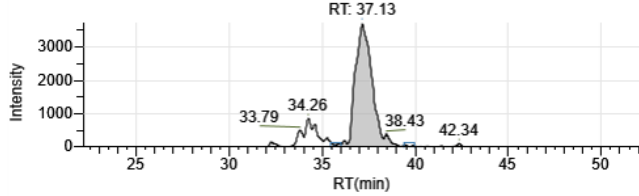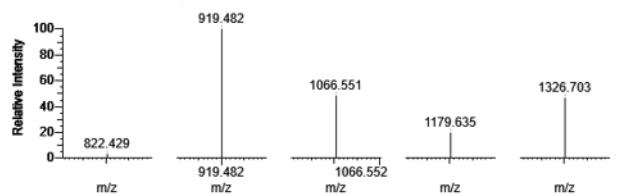

P17  
A147 Sample

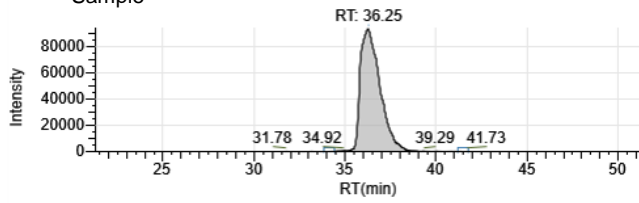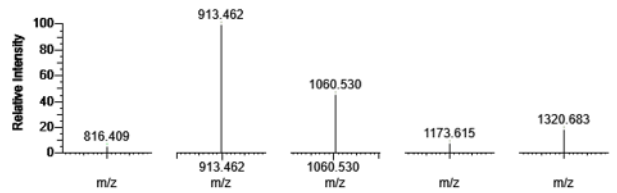

A147 MS-QBIC

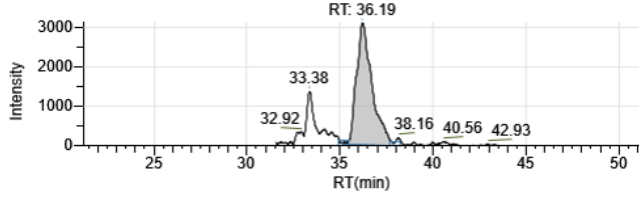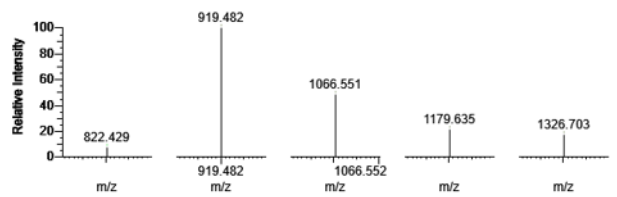

P18  
A149 Sample

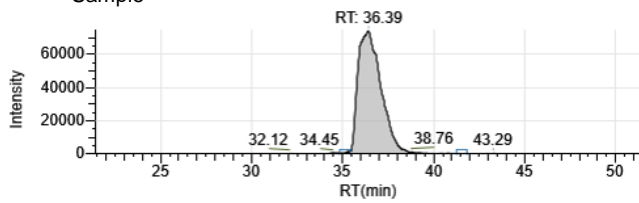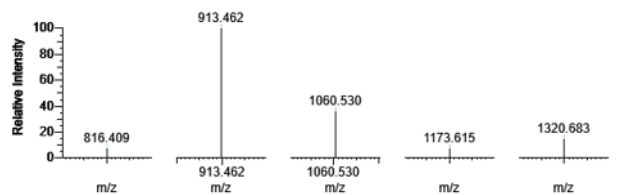

A149 MS-QBIC

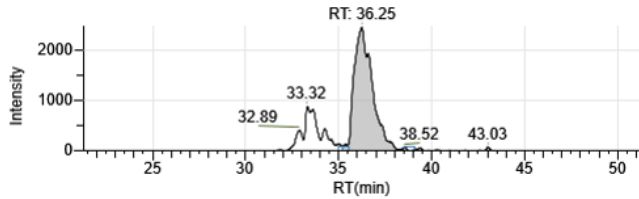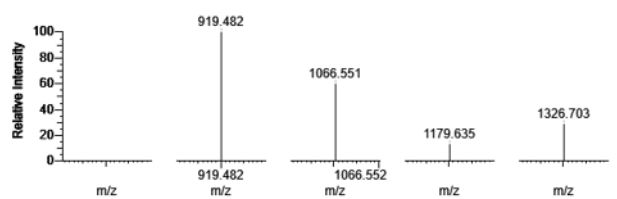

P19  
A126 Sample

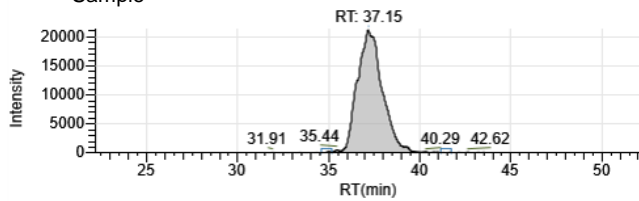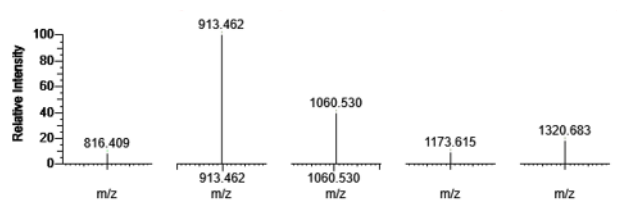

A126 MS-QBIC

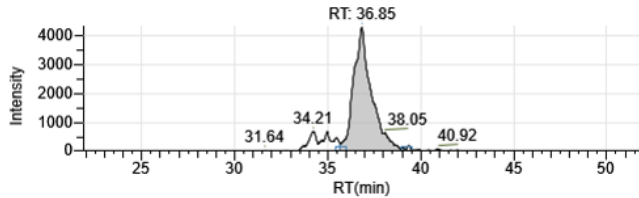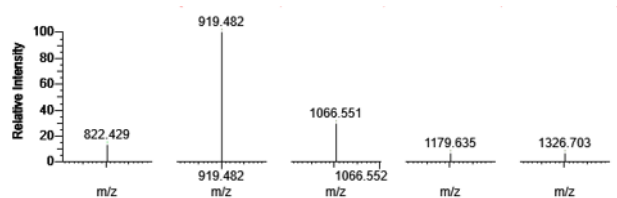

P20  
A167 Sample

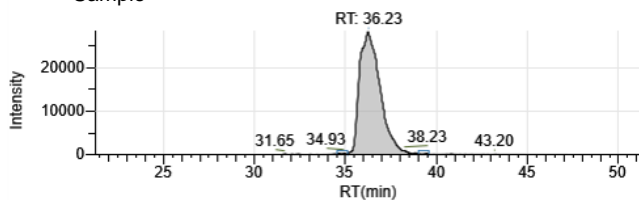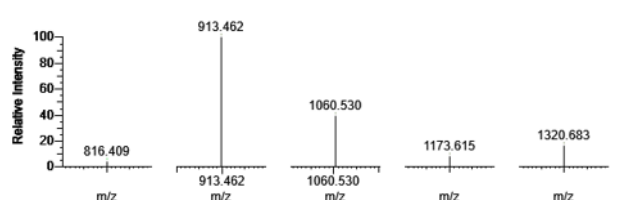

A167 MS-QBIC

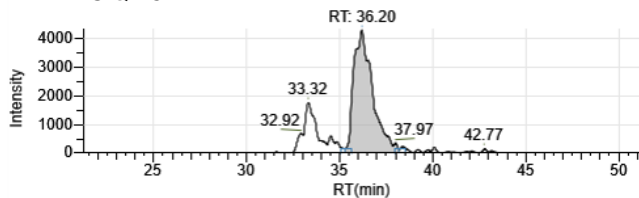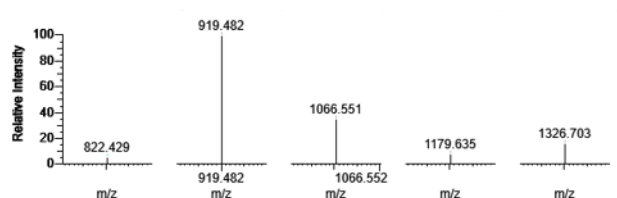

P26  
A127

Sample

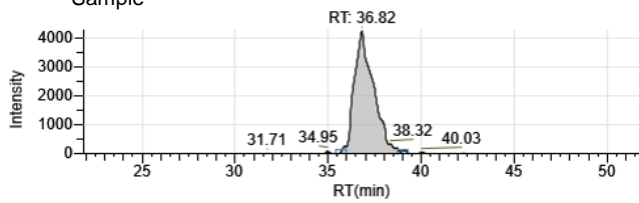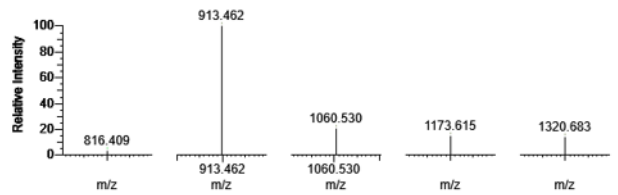

A127 MS-QBIC

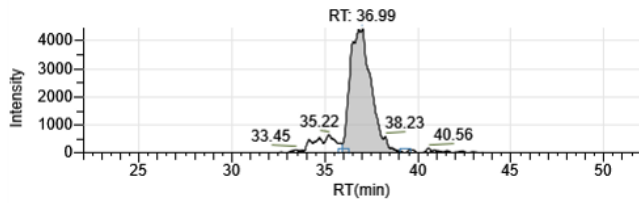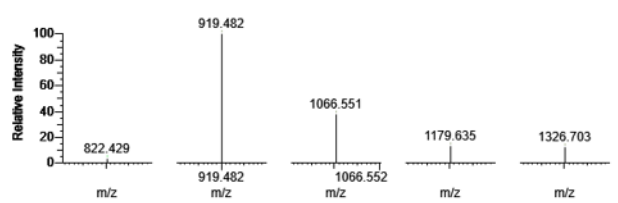

P27  
A144

Sample

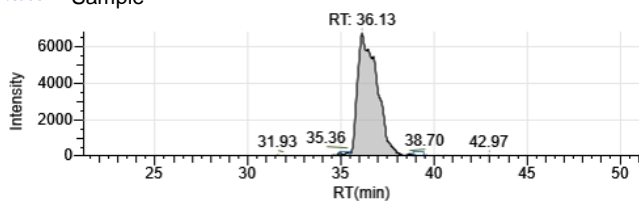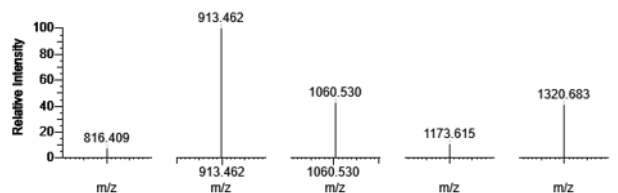

A144 MS-QBIC

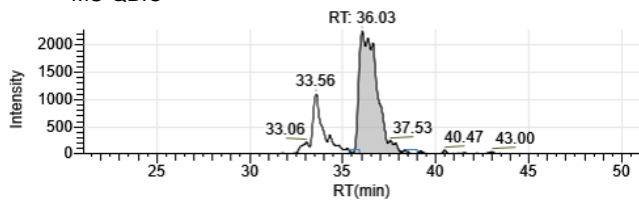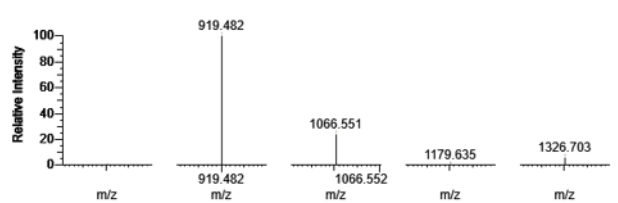

P28  
A152

Sample

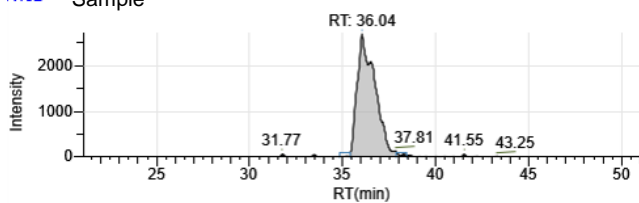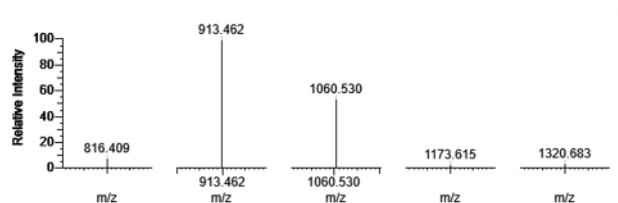

A152 MS-QBIC

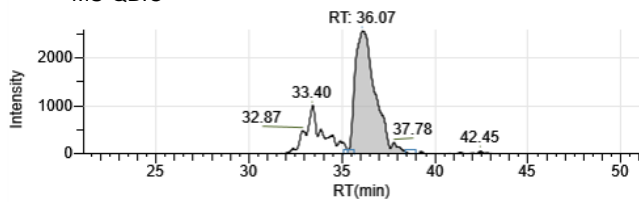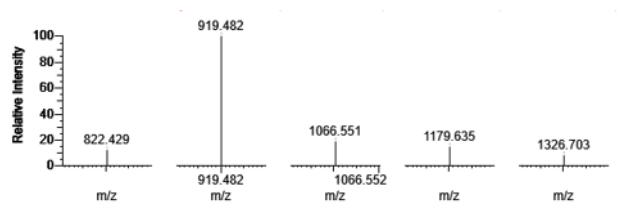

P29  
A141

Sample

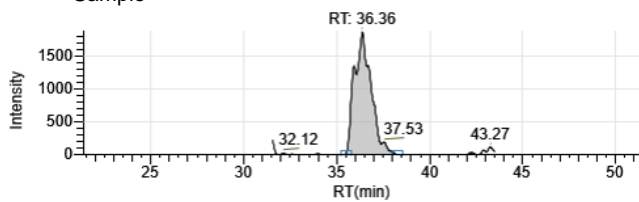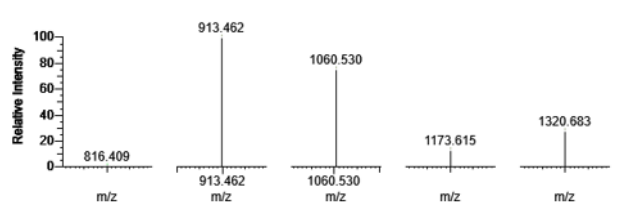

A141 MS-QBIC

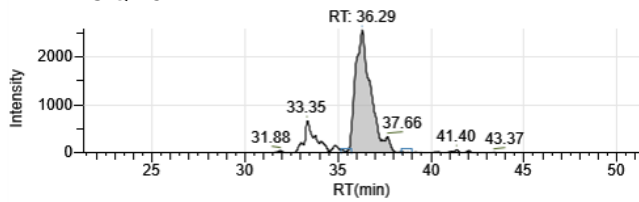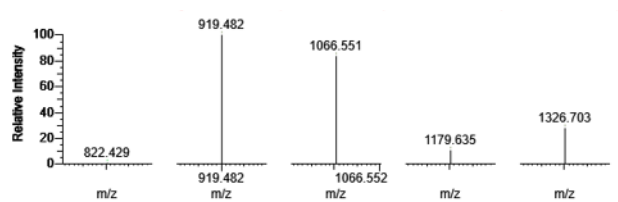



P30  
A164 Sample

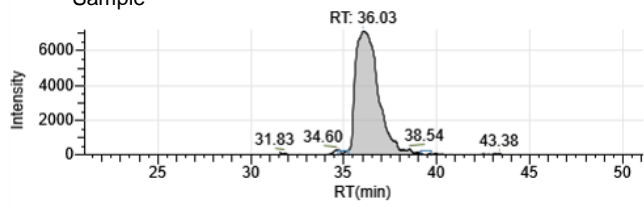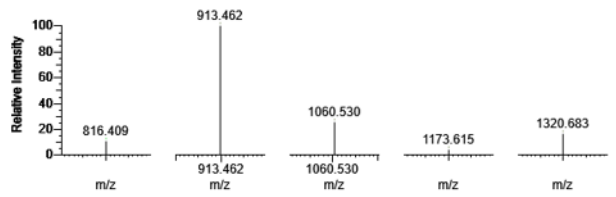

A164 MS-QBIC

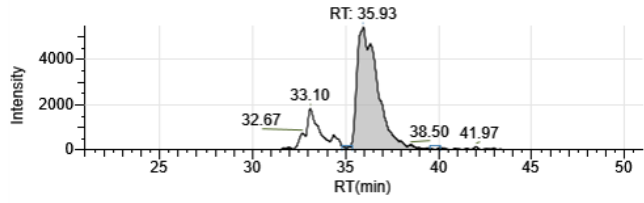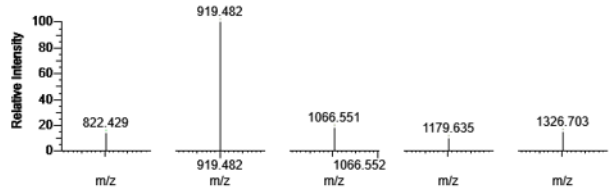

# P IGL (YAASSYLSLTPEQWK) Another organ

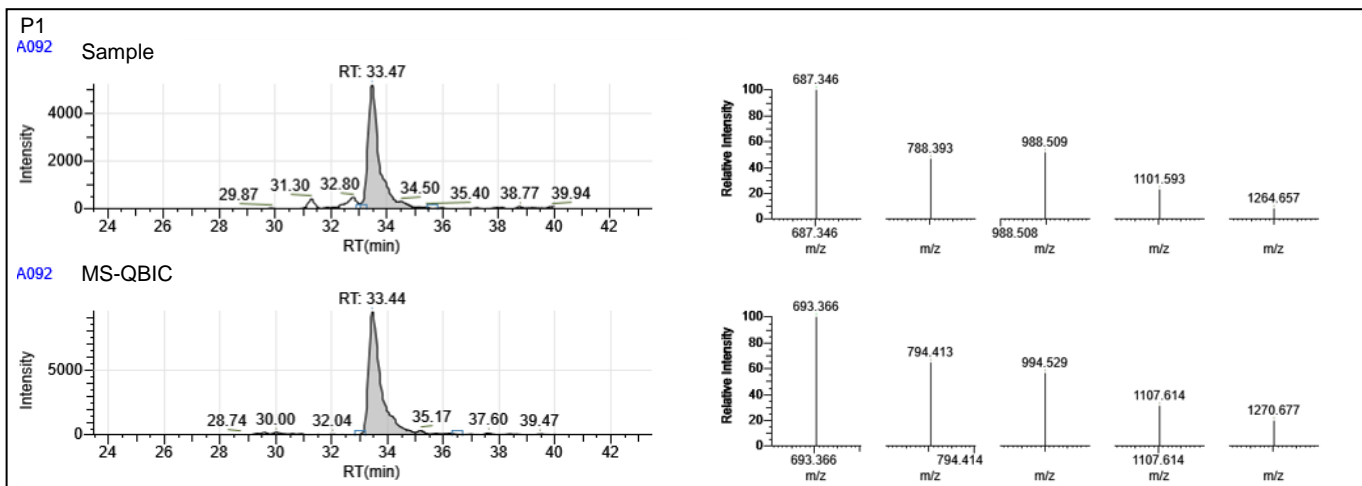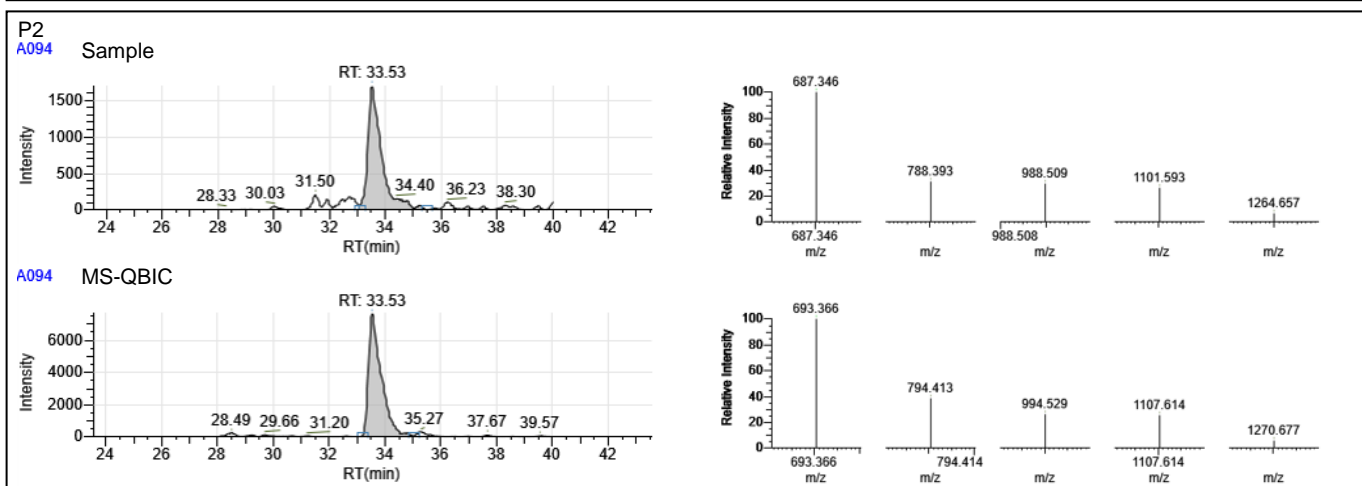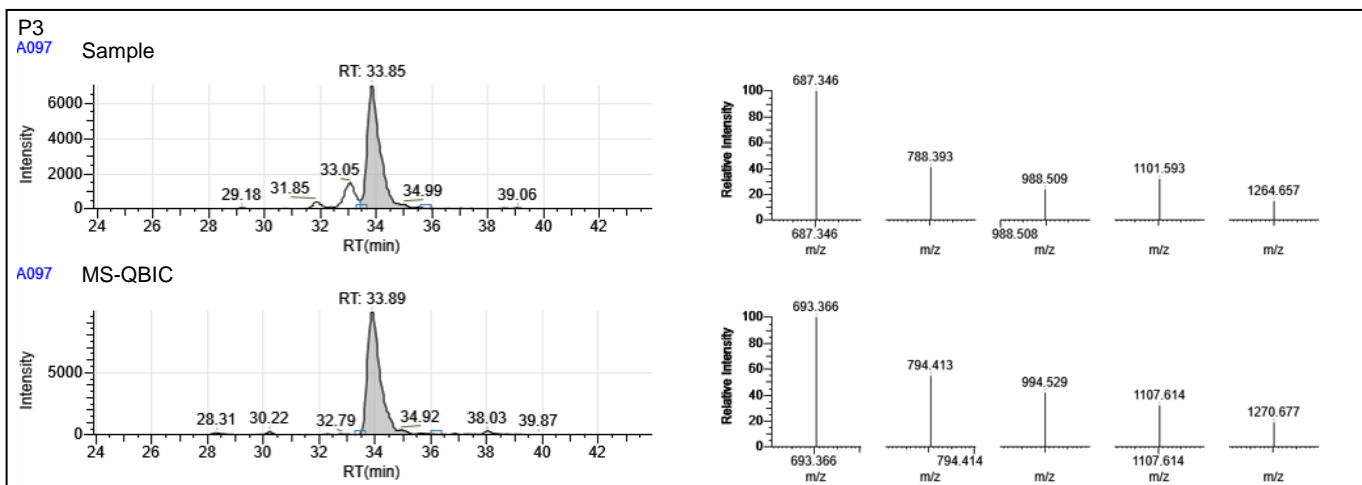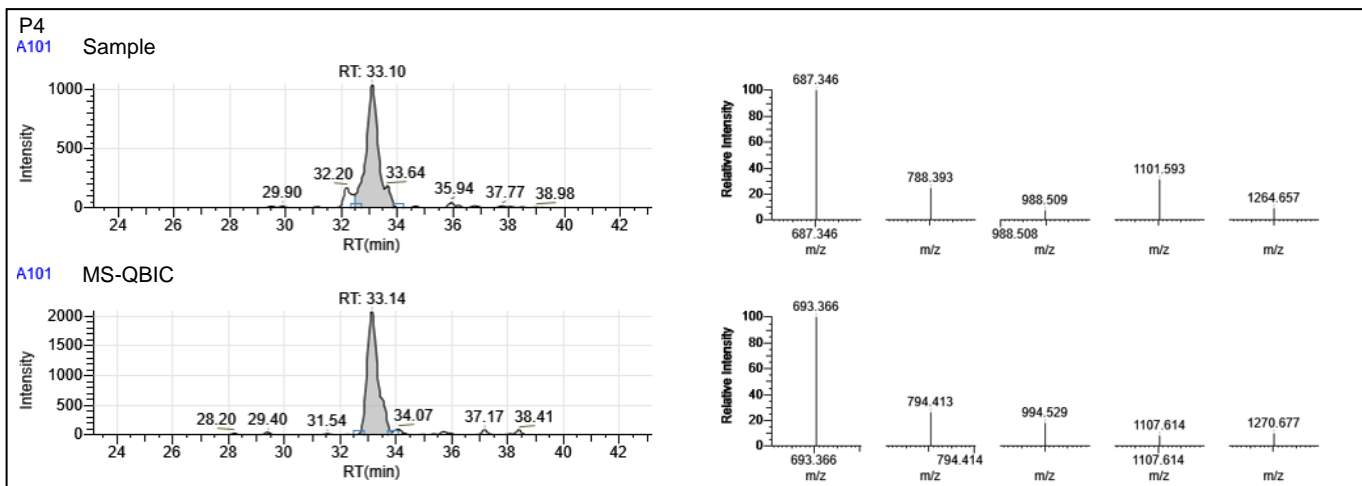

P5  
A105 Sample

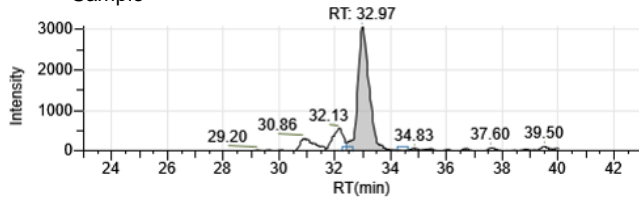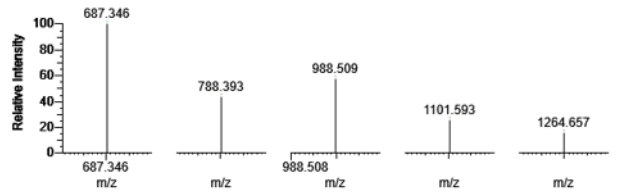

A105 MS-QBIC

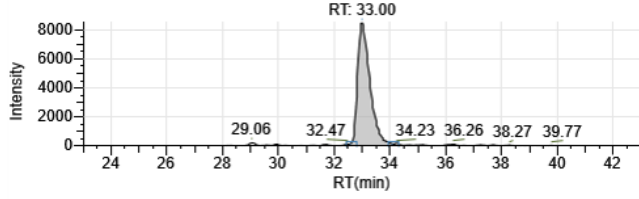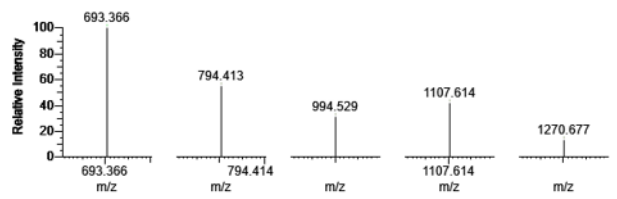

P6  
A107 Sample

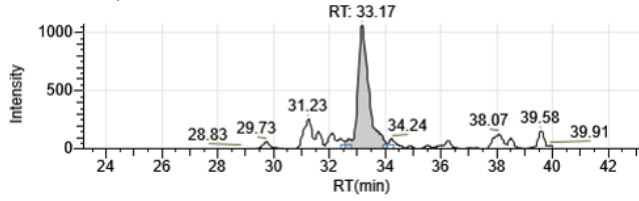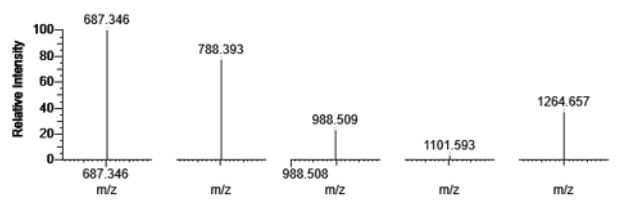

A107 MS-QBIC

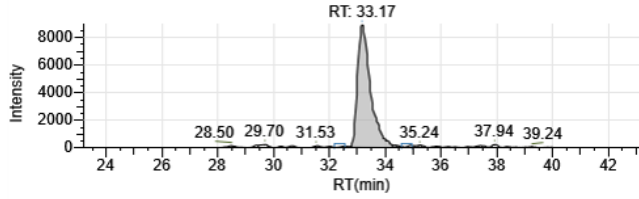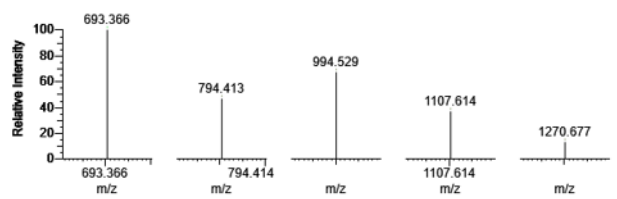

P7  
A161 Sample

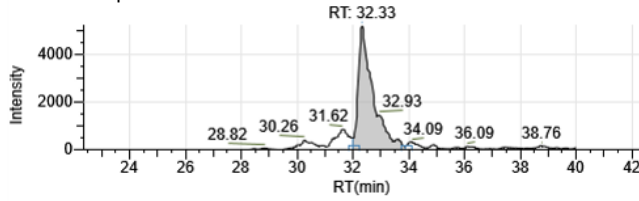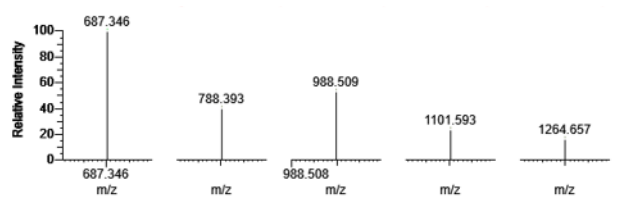

A161 MS-QBIC

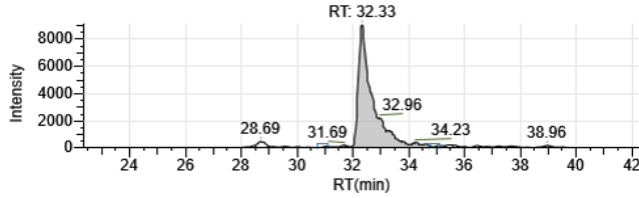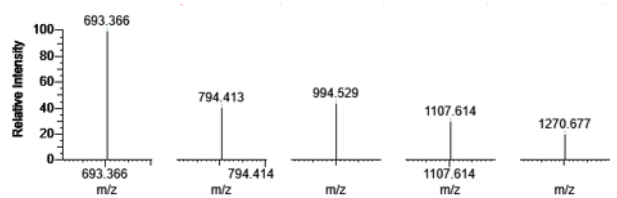

P8  
A110 Sample

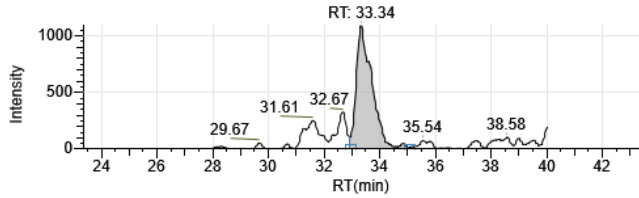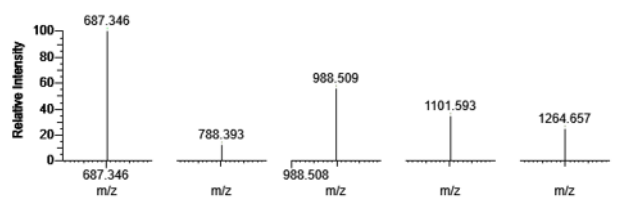

A110 MS-QBIC

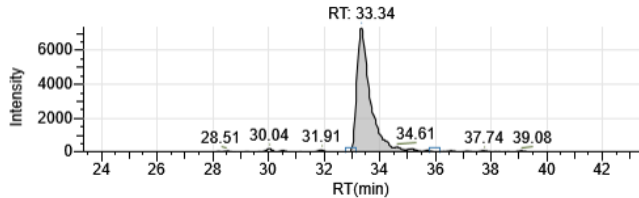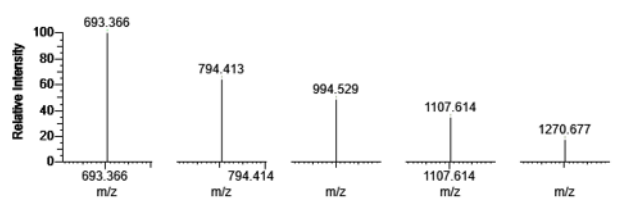

P9  
A114 Sample

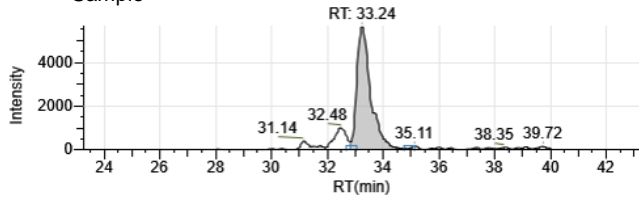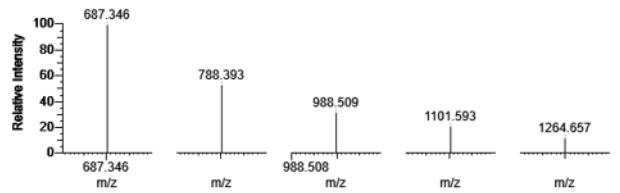

A114 MS-QBIC

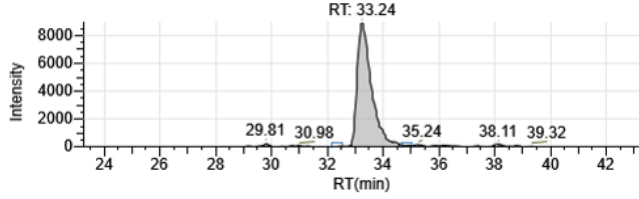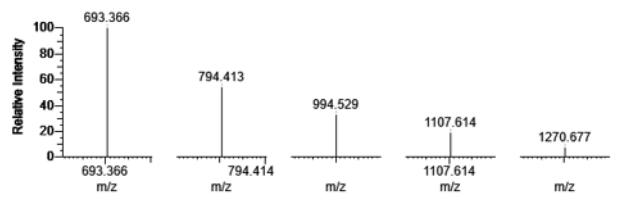

P10  
A115 Sample

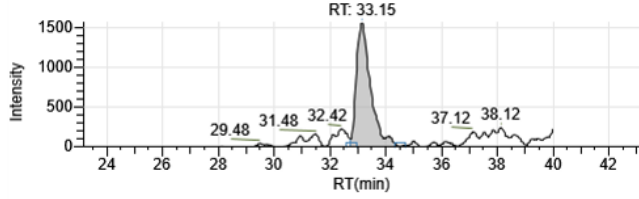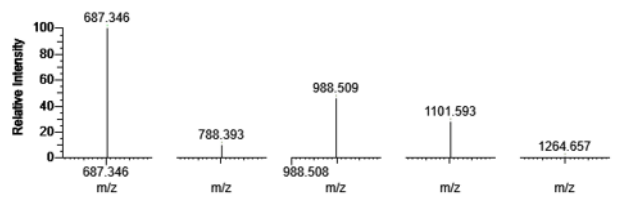

A115 MS-QBIC

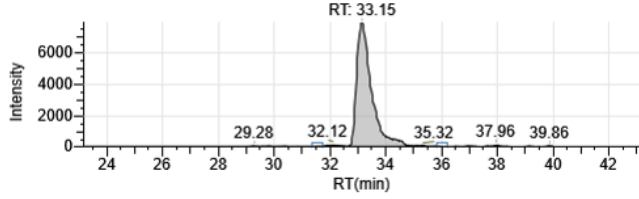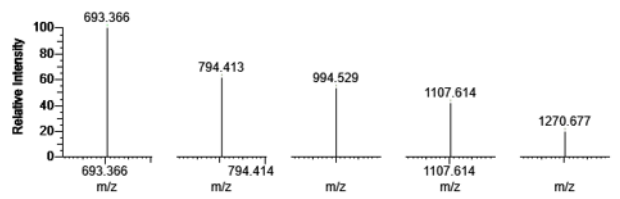

P13  
A118 Sample

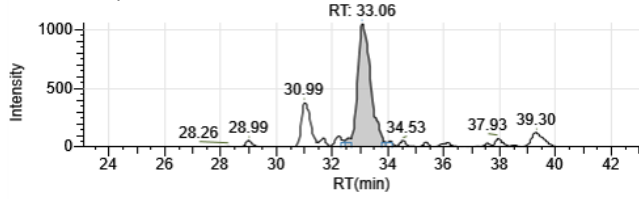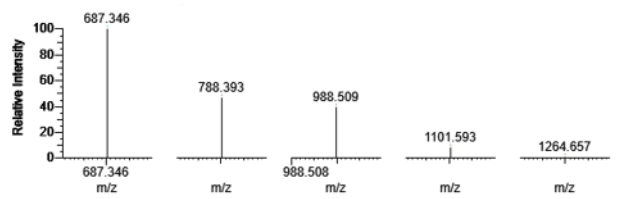

A118 MS-QBIC

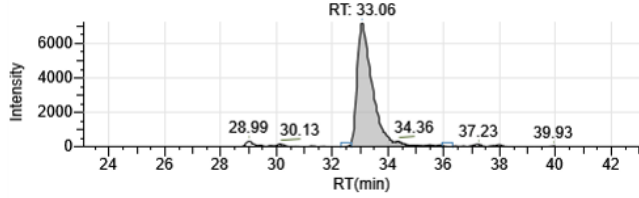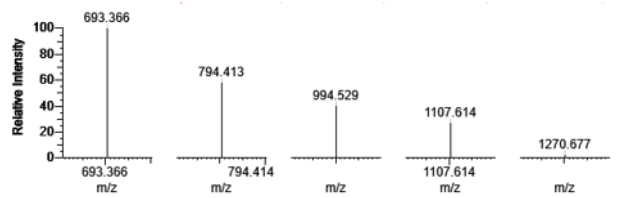

P14  
A122 Sample

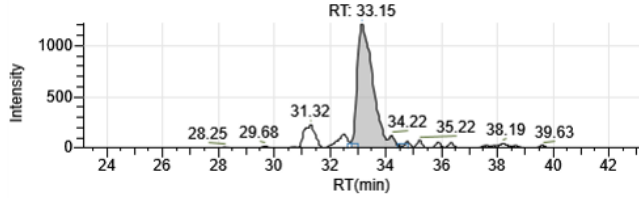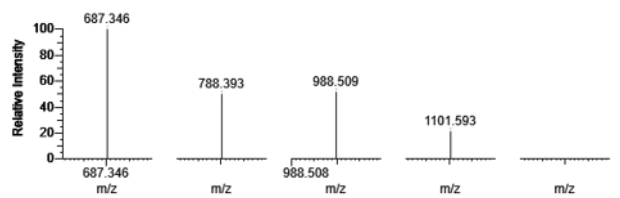

A122 MS-QBIC

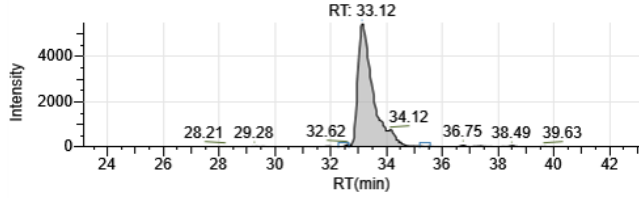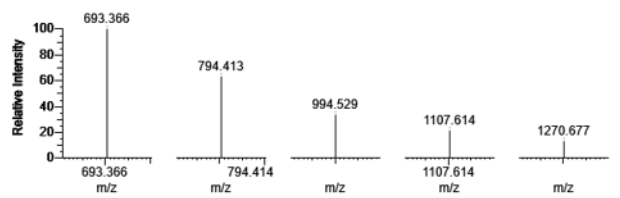

P15  
A170 Sample

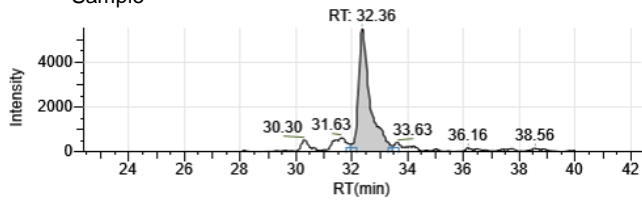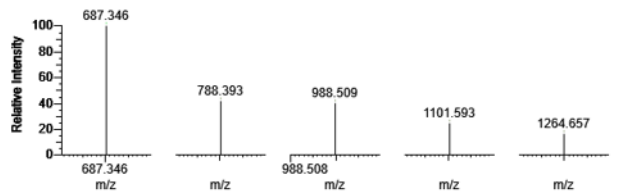

A170 MS-QBIC

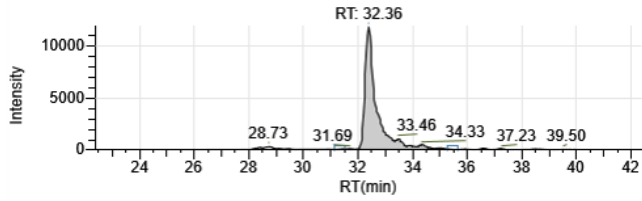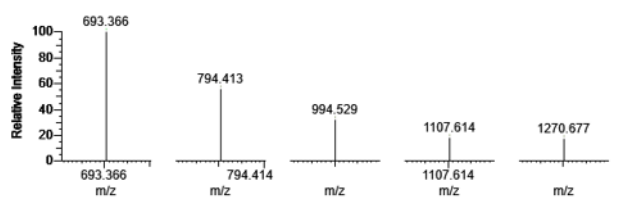

P16  
A173 Sample

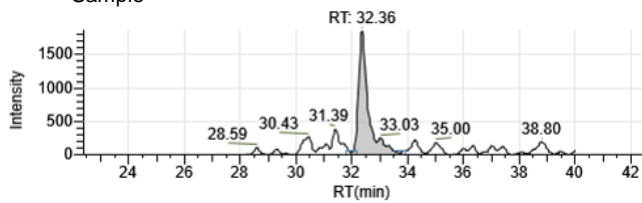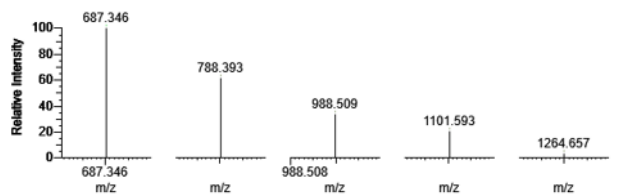

A173 MS-QBIC

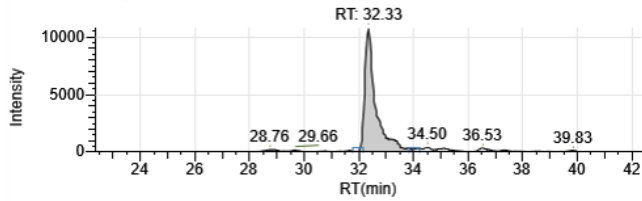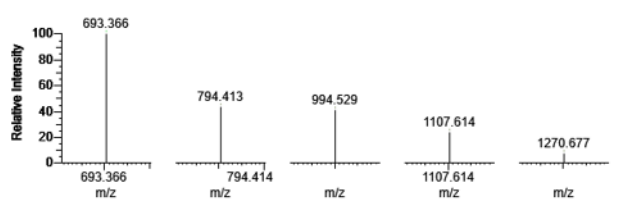

P18  
A134 Sample

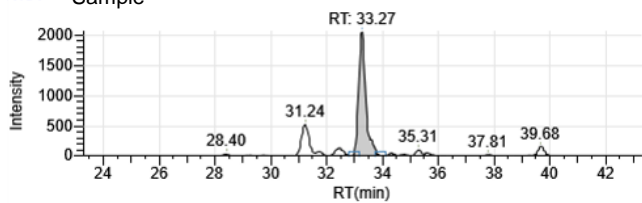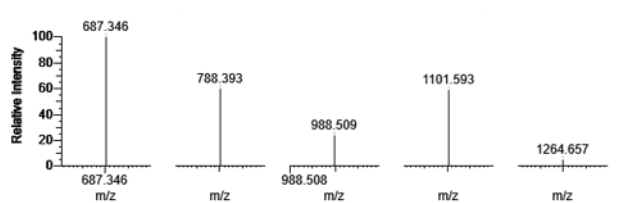

A134 MS-QBIC

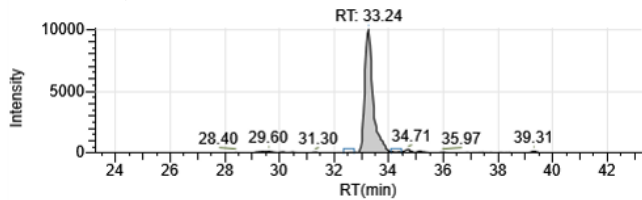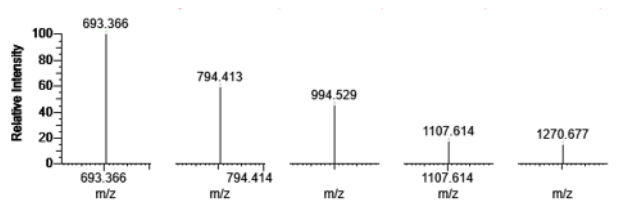

P20  
A146 Sample

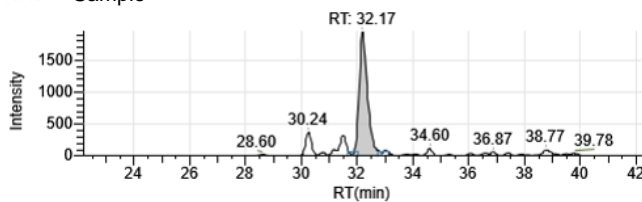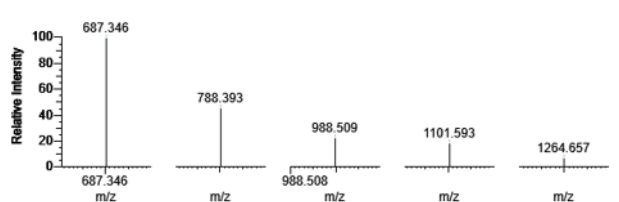

A146 MS-QBIC

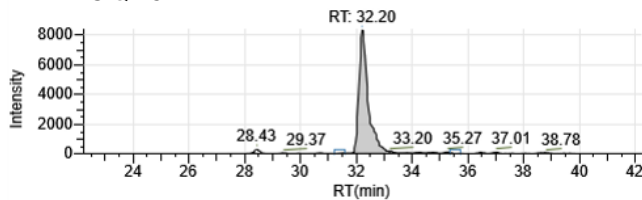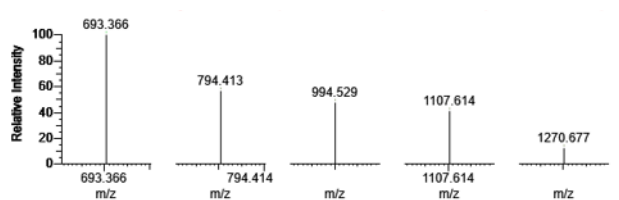

P22  
A124

Sample

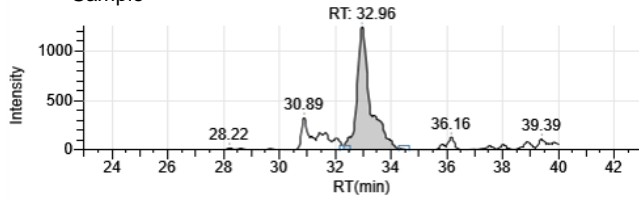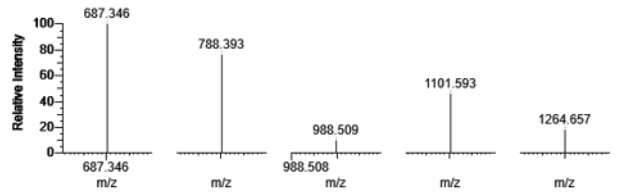

A124 MS-QBIC

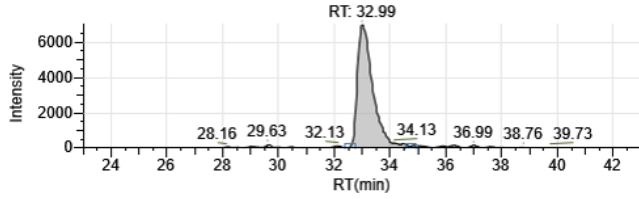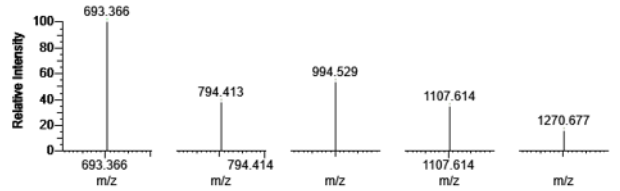

P23  
A168

Sample

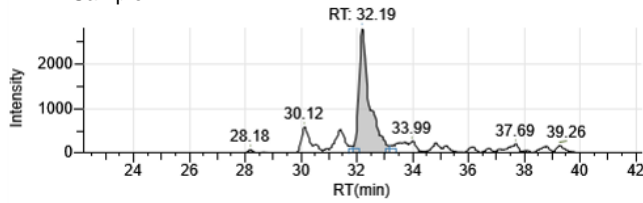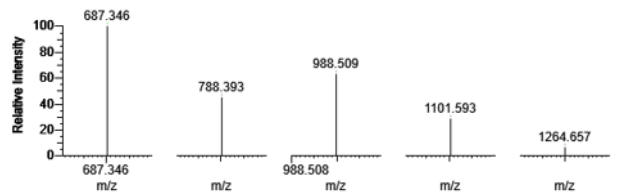

A168 MS-QBIC

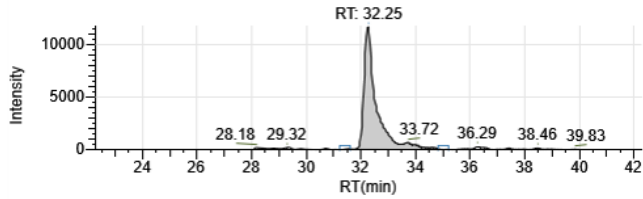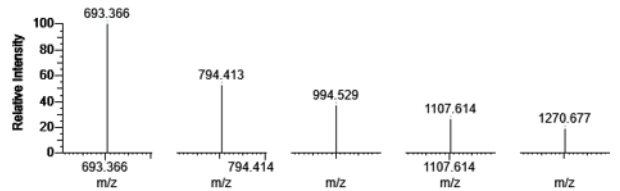

P24  
A155

Sample

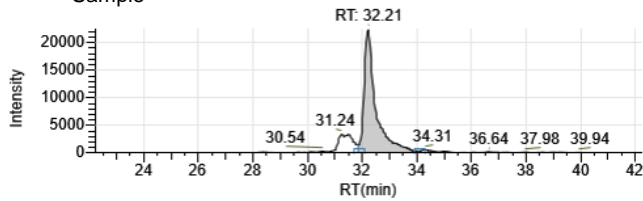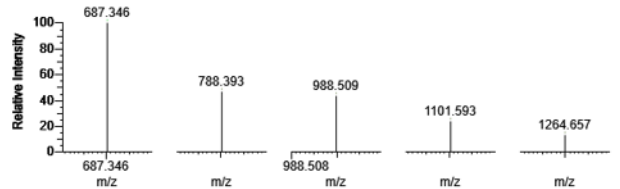

A155 MS-QBIC

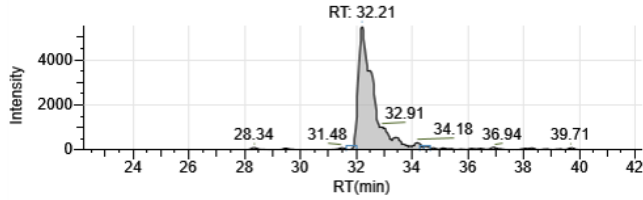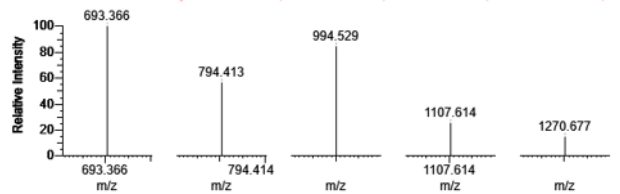

P25  
A158

Sample

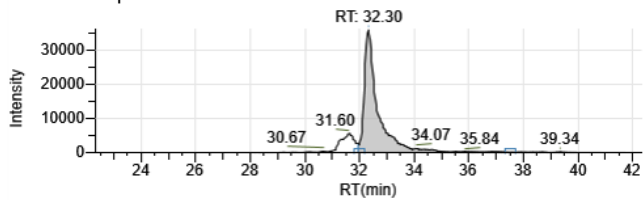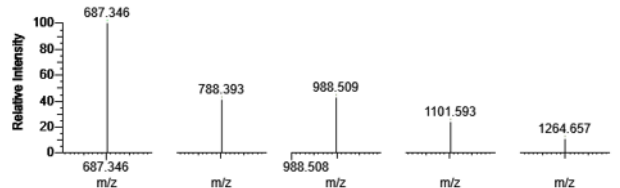

A158 MS-QBIC

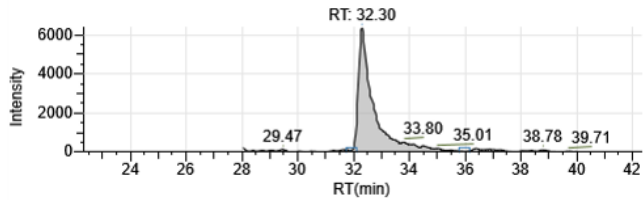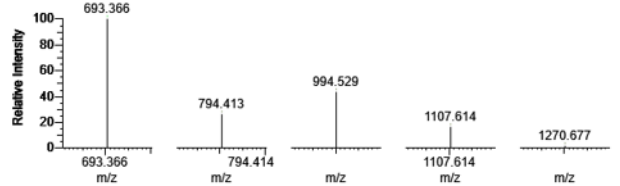

P26  
A127

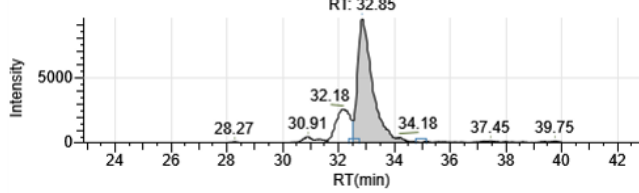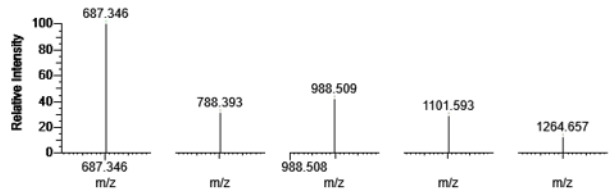

A127 MS-QBIC

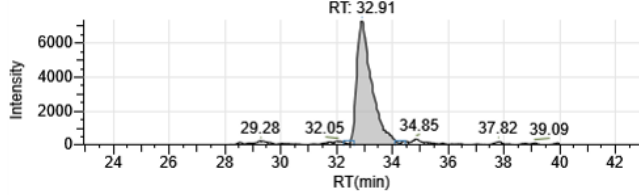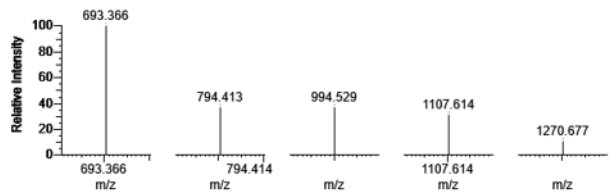

P27  
A143

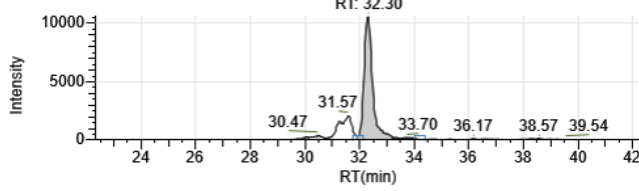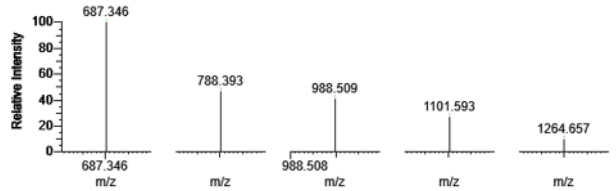

A143 MS-QBIC

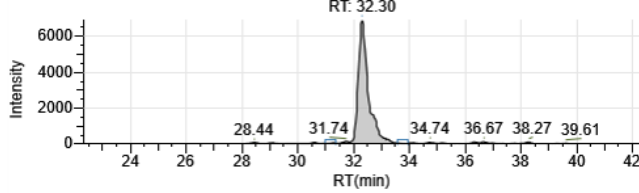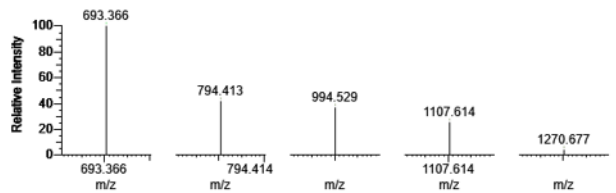

P28  
A152

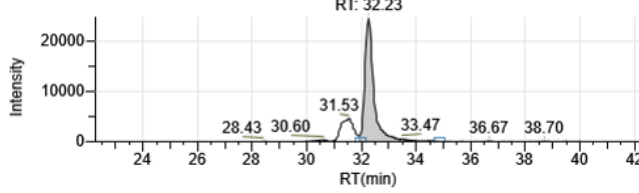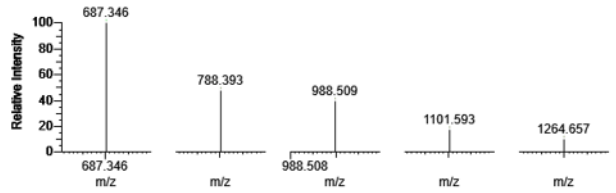

A152 MS-QBIC

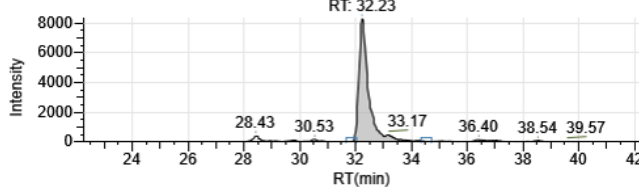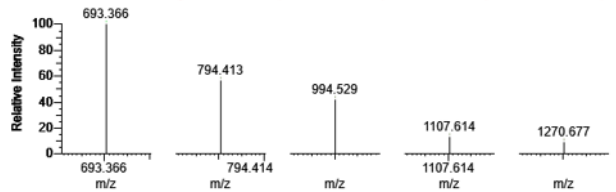

P29  
A140

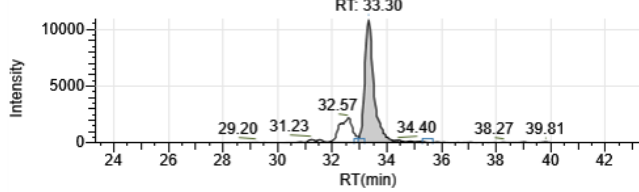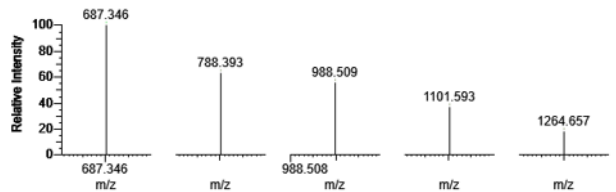

A140 MS-QBIC

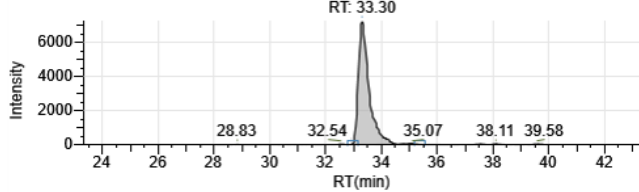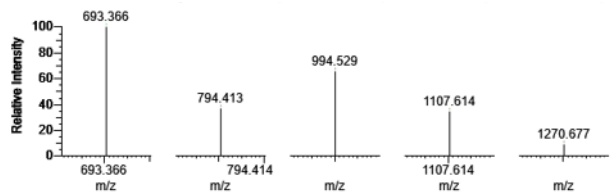



P30  
A164 Sample

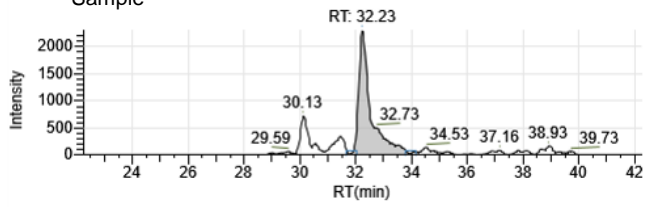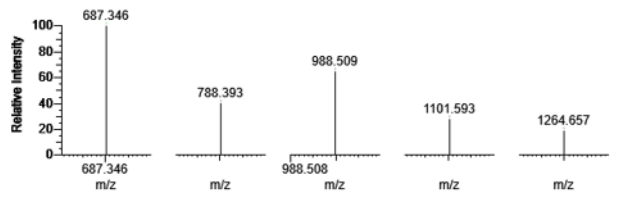

A164 MS-QBIC

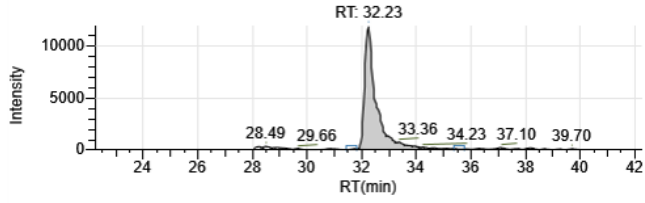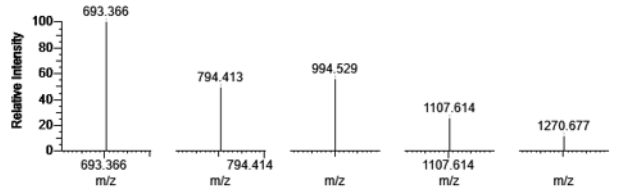

# Q B2M (IQVYSR) Another organ

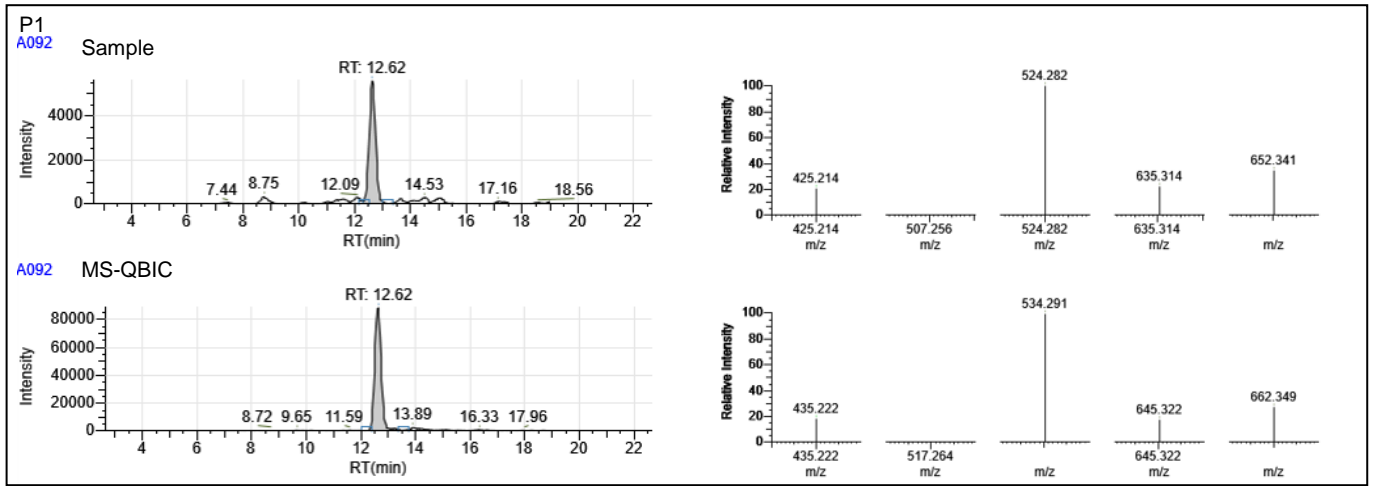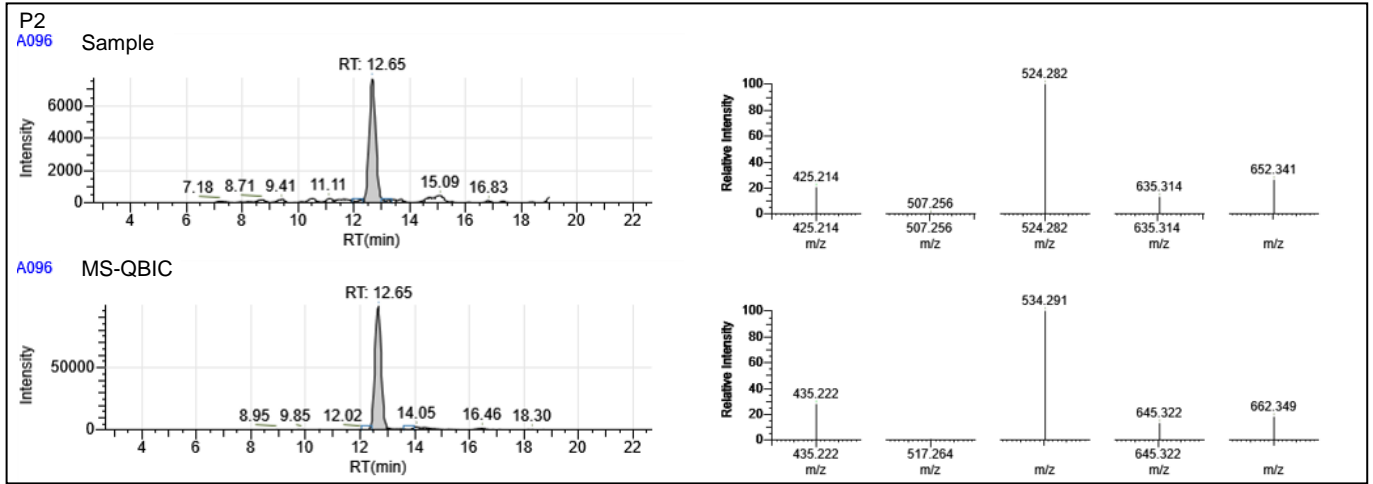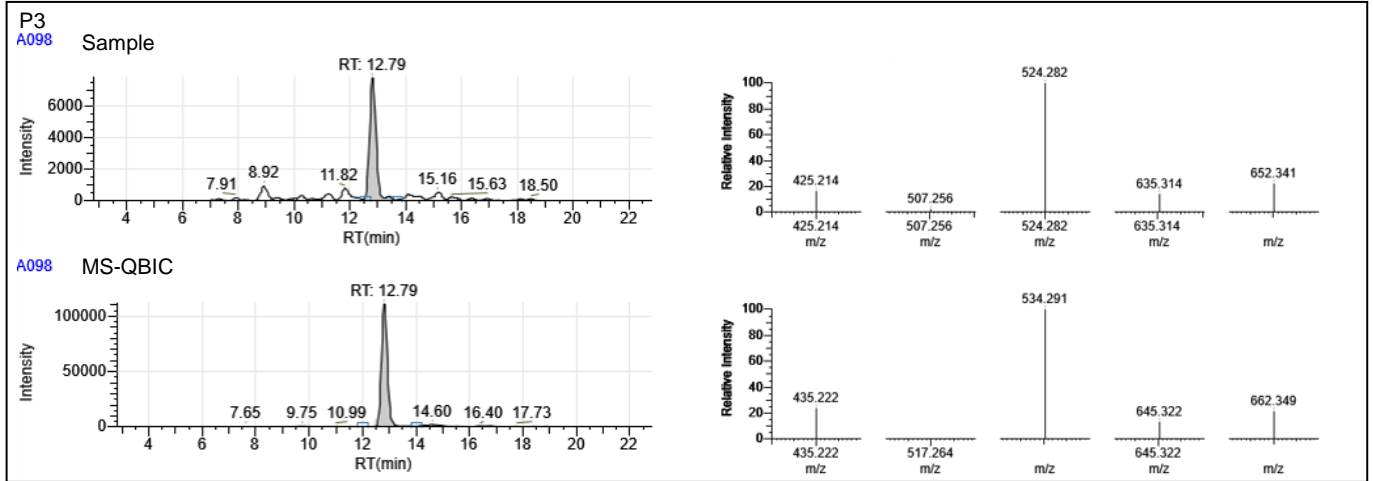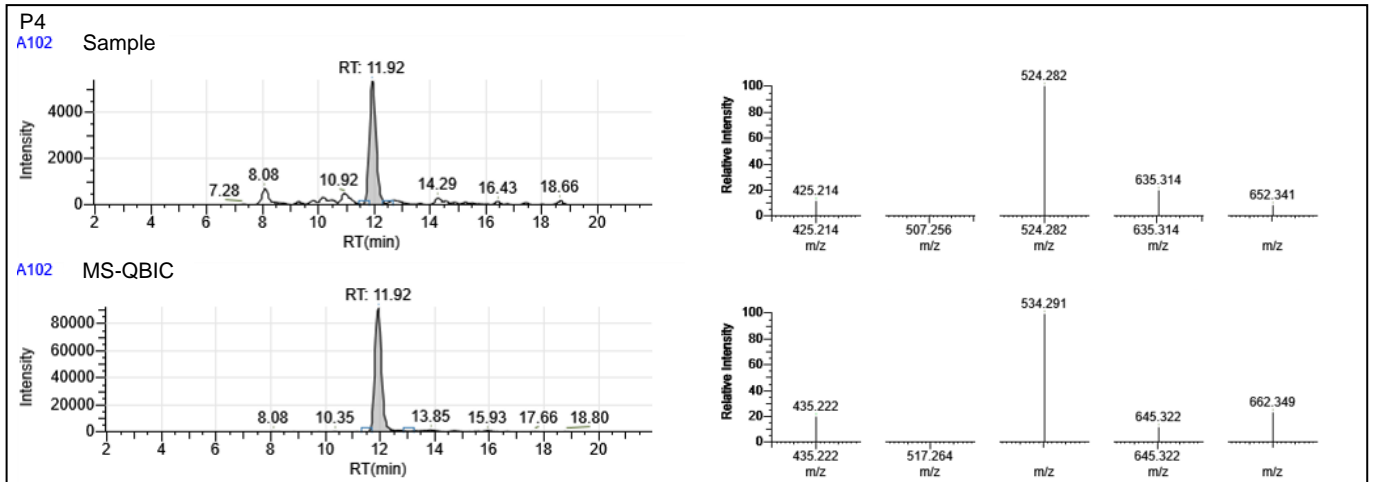

P5  
A105 Sample

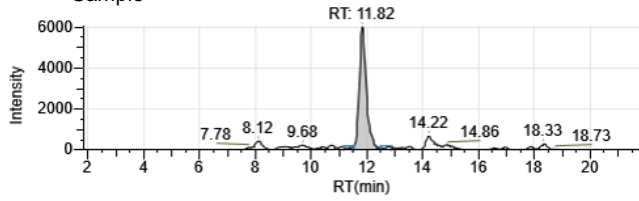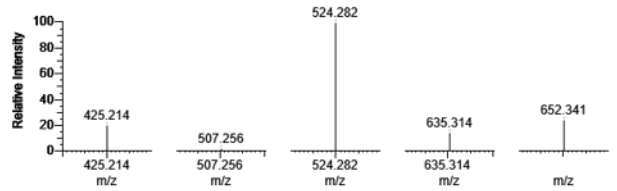

A105 MS-QBIC

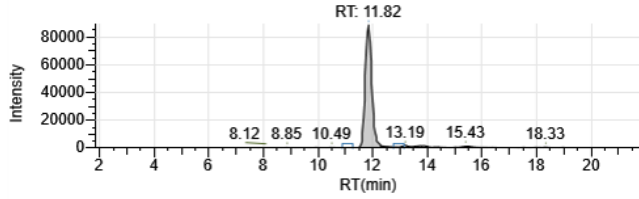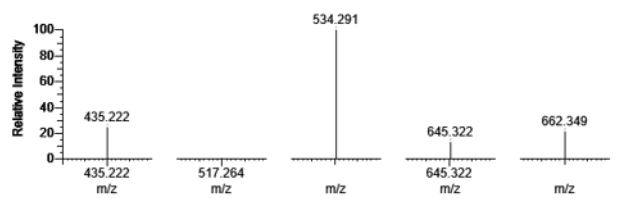

P6  
A107 Sample

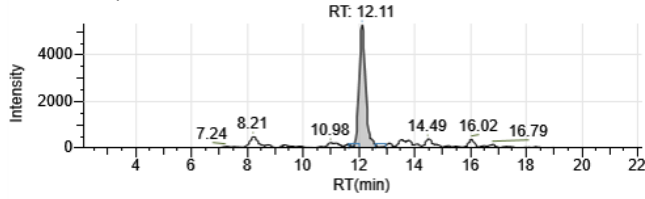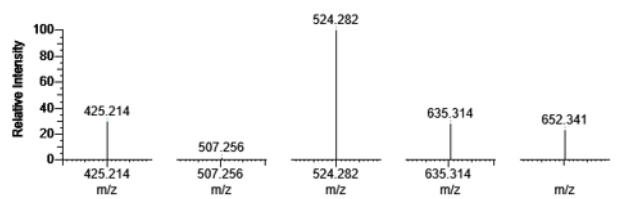

A107 MS-QBIC

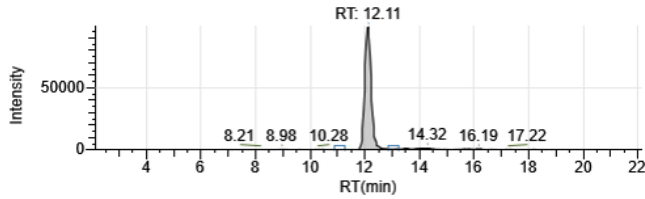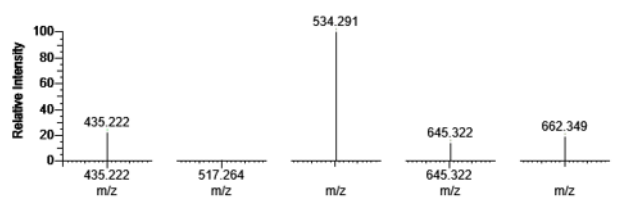

P7  
A160 Sample

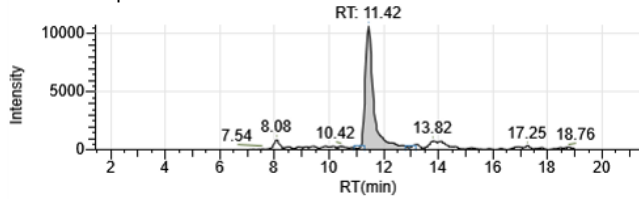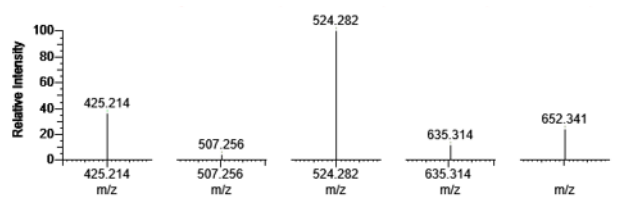

A160 MS-QBIC

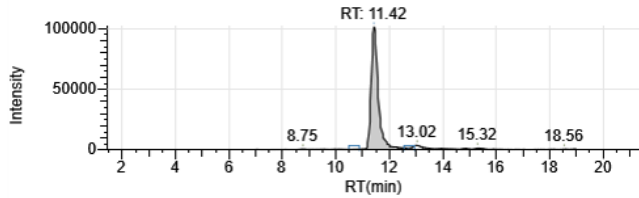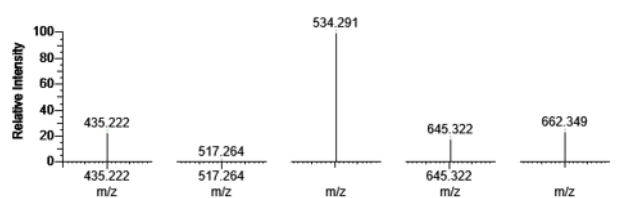

P8  
A110 Sample

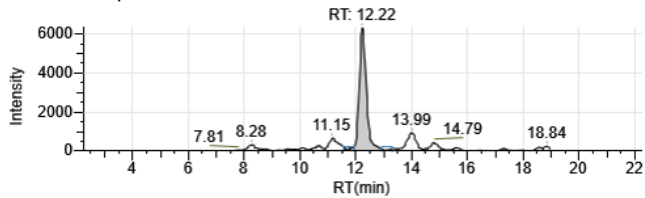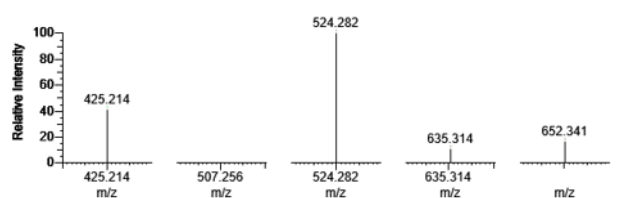

A110 MS-QBIC

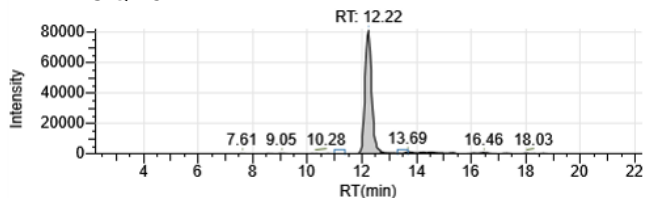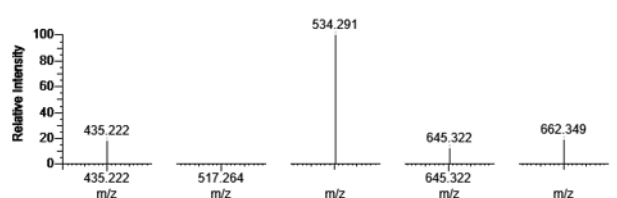

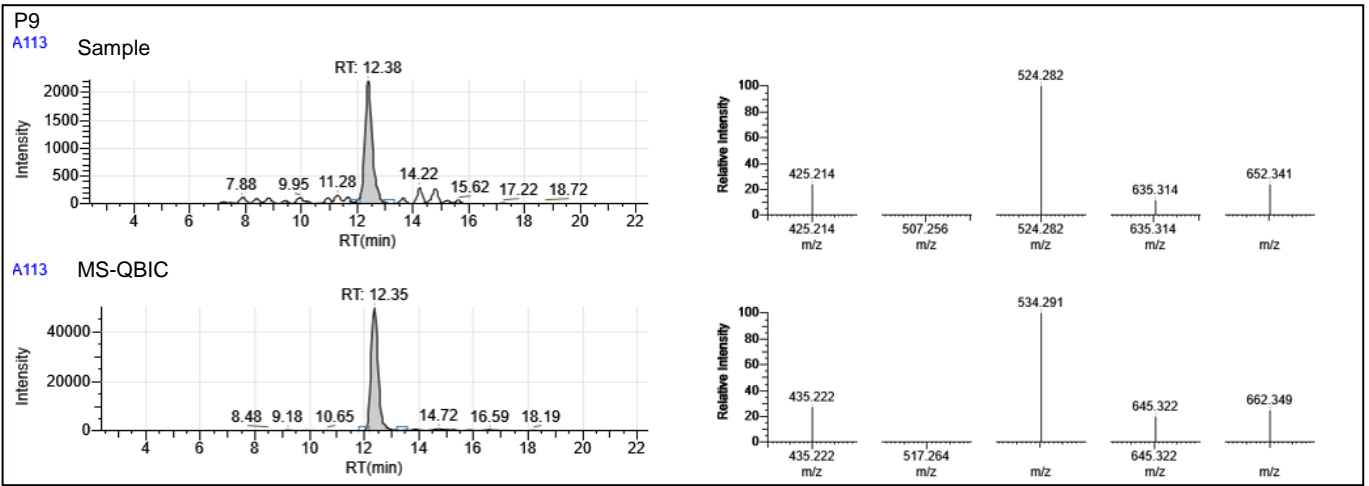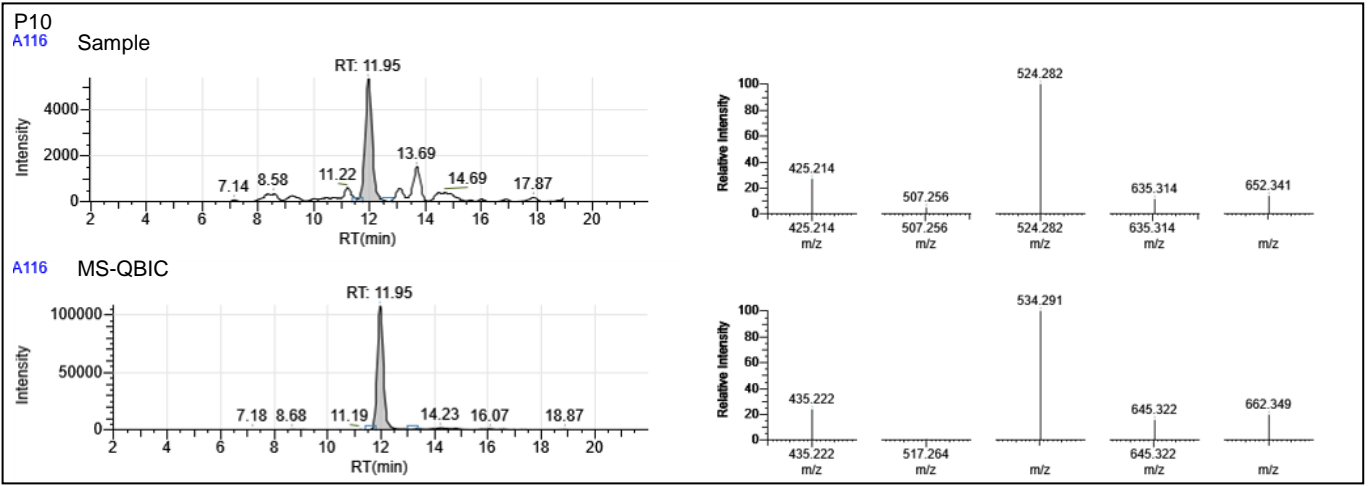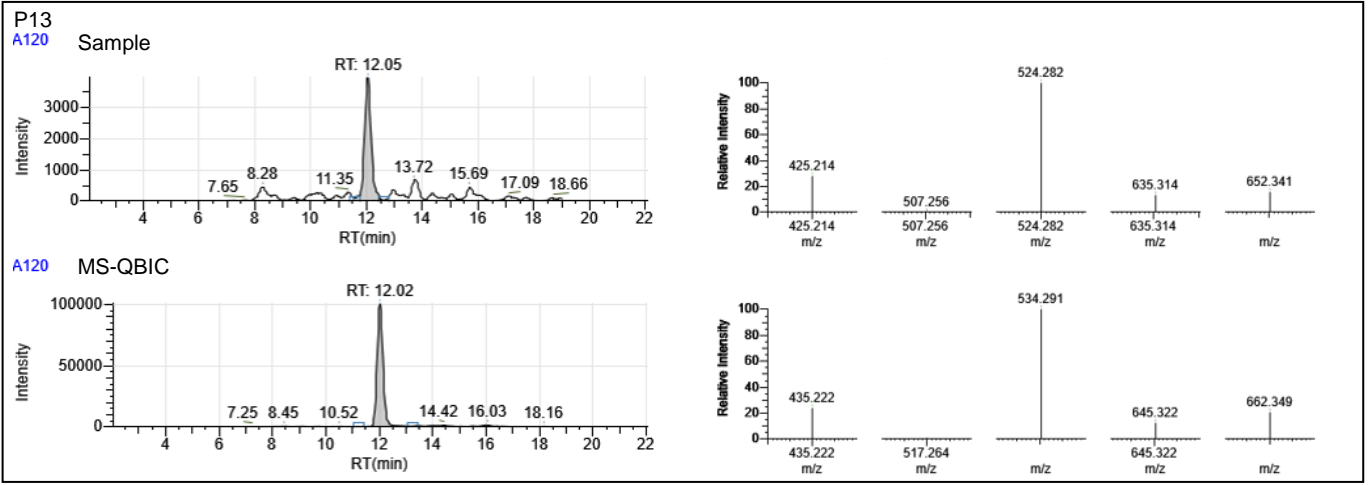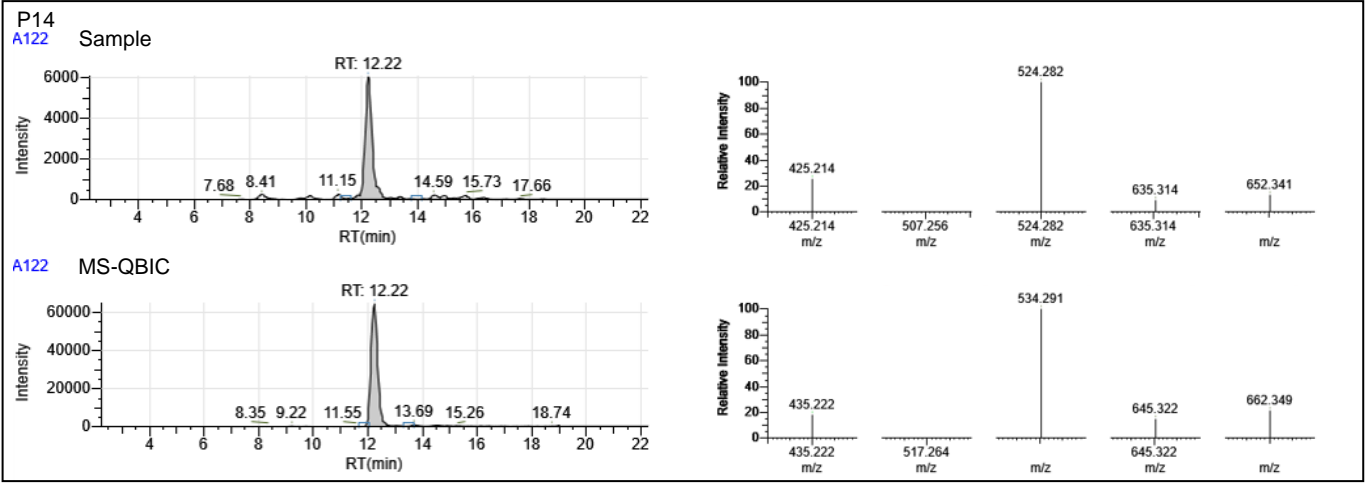

P15  
A169 Sample

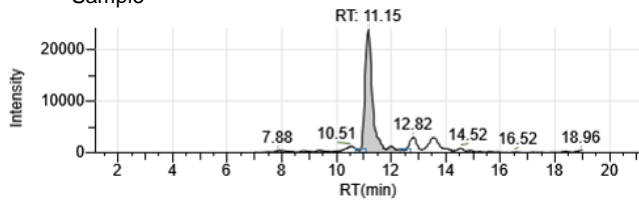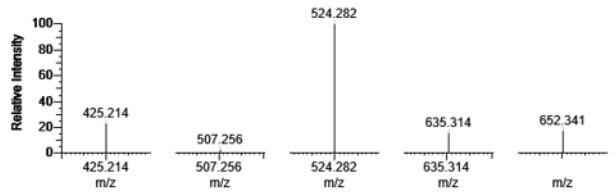

A169 MS-QBIC

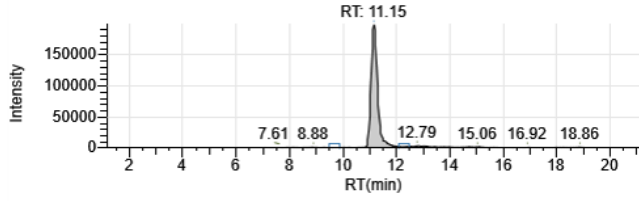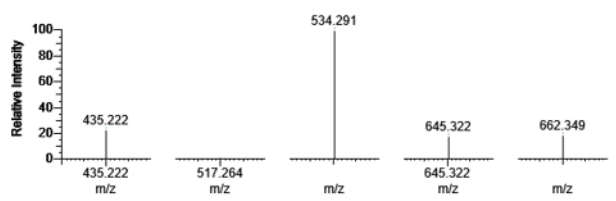

P16  
A172 Sample

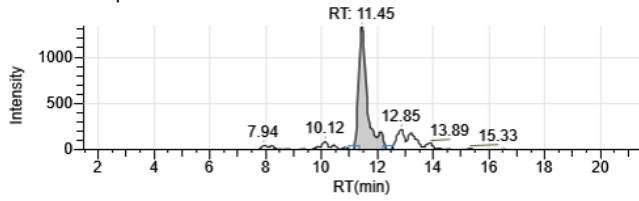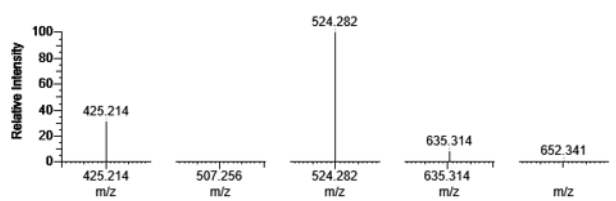

A172 MS-QBIC

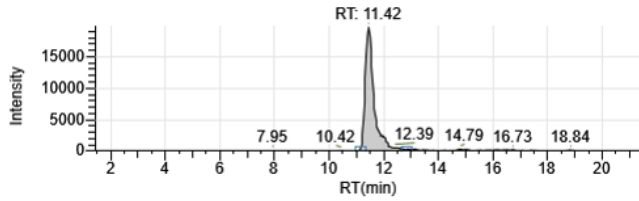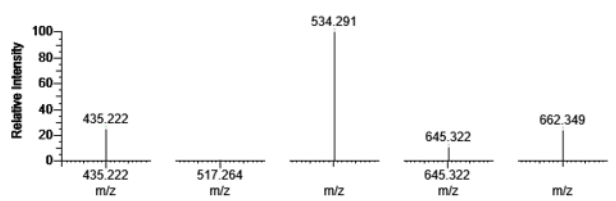

P17  
A131 Sample

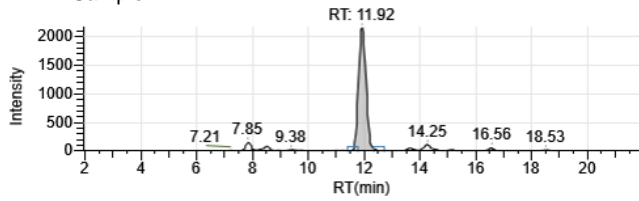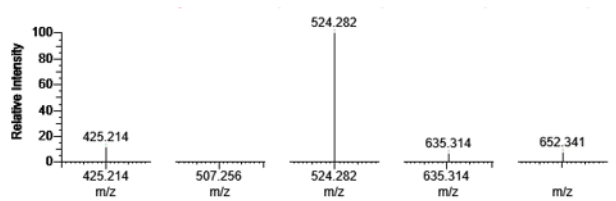

A131 MS-QBIC

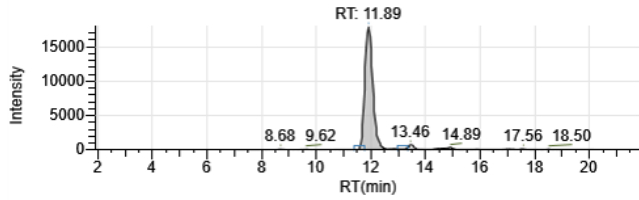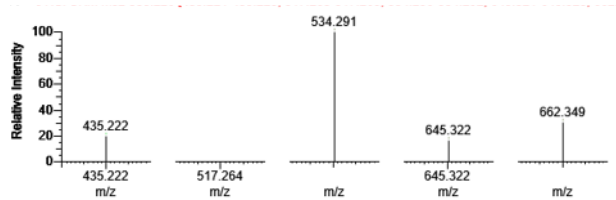

P18  
A134 Sample

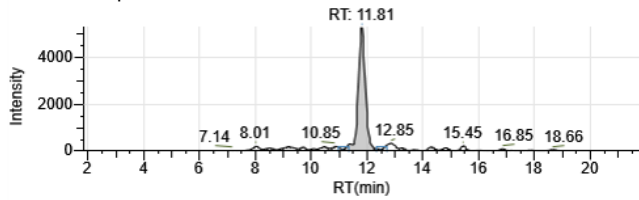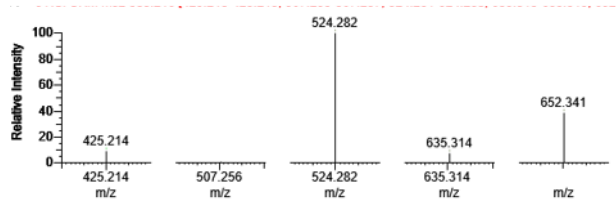

A134 MS-QBIC

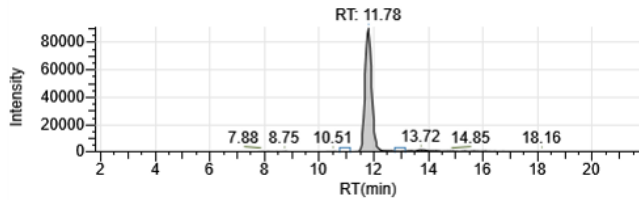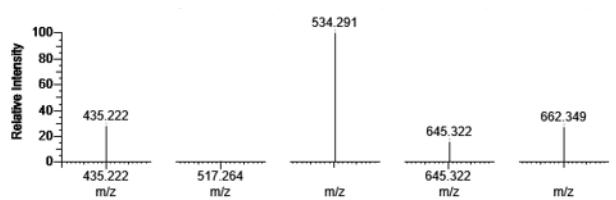

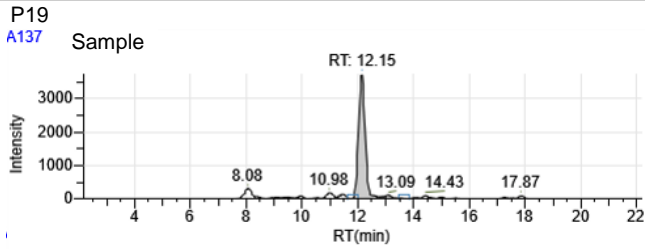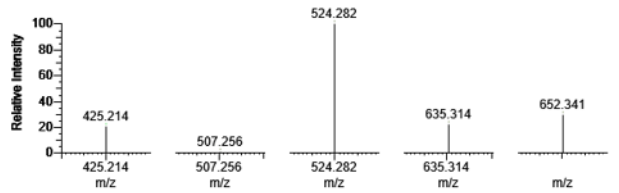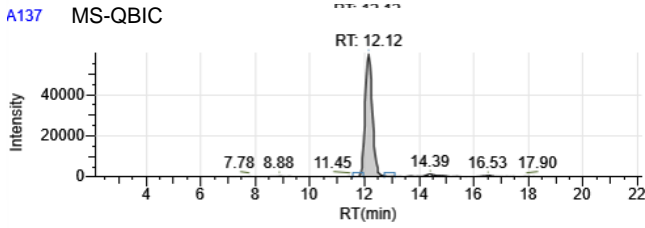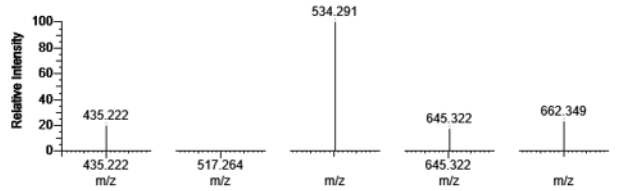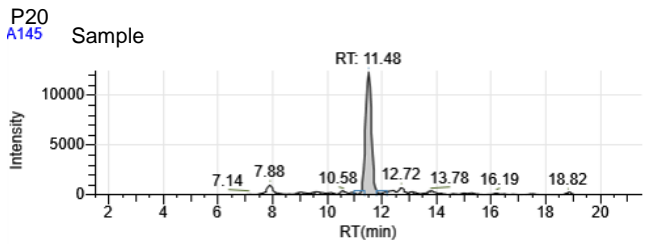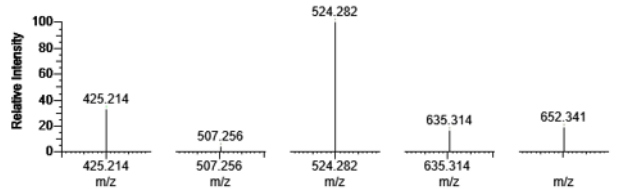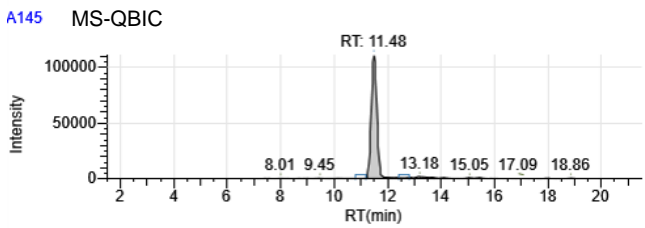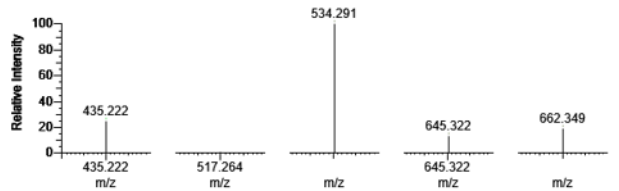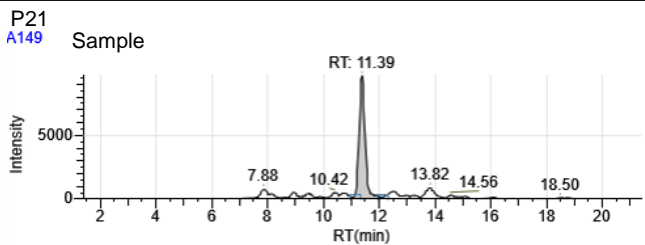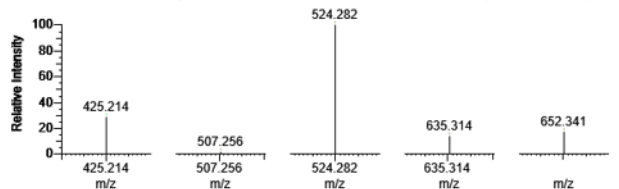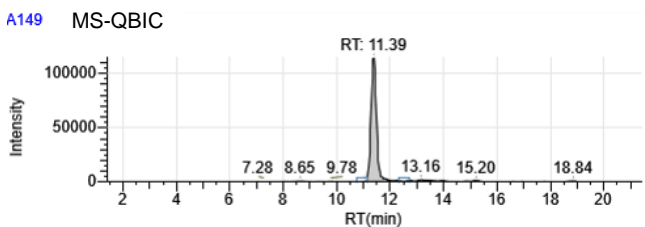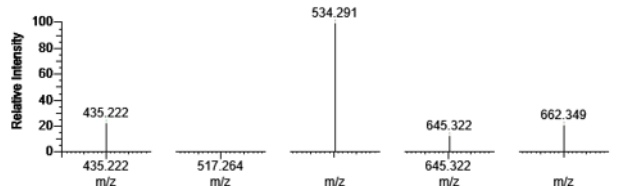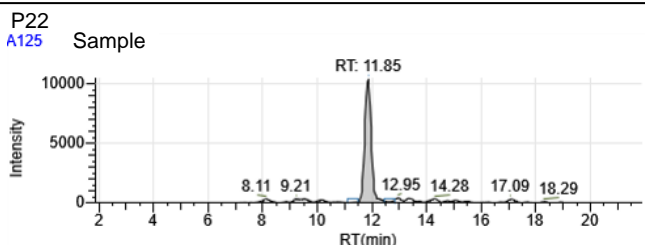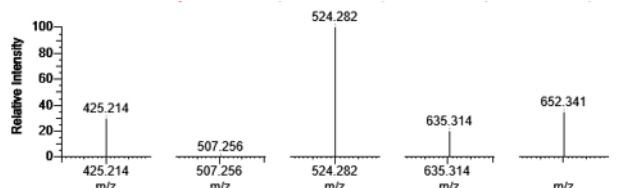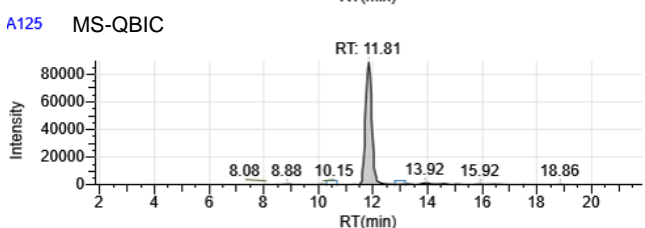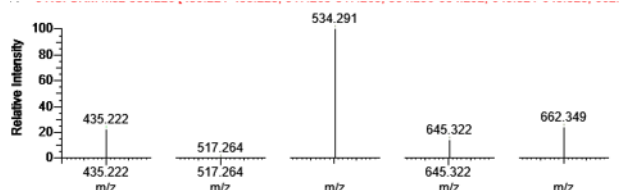

P23  
A166 Sample

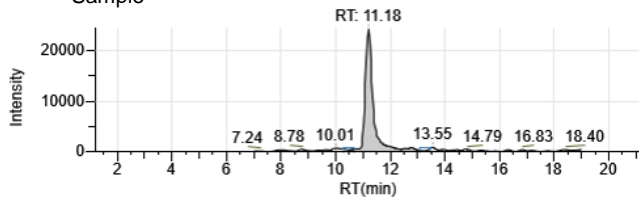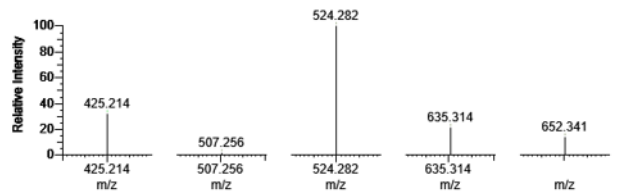

A166 MS-QBIC

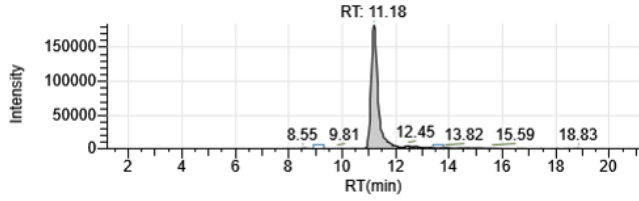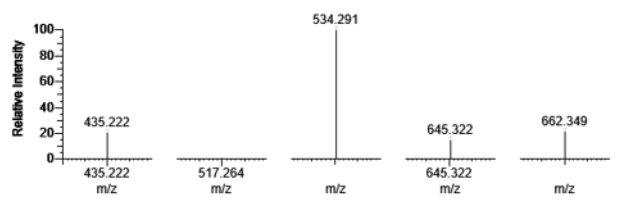

P24  
A154 Sample

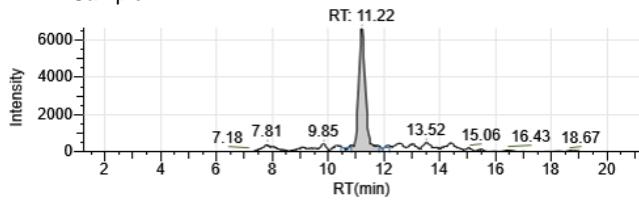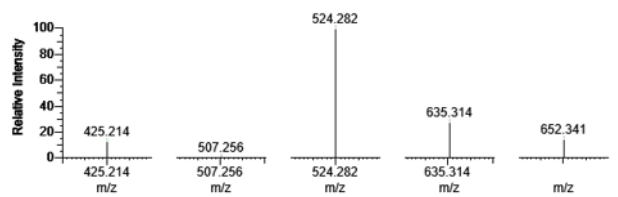

A154 MS-QBIC

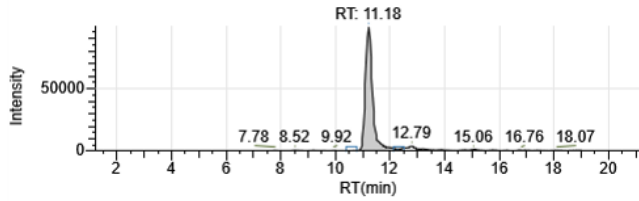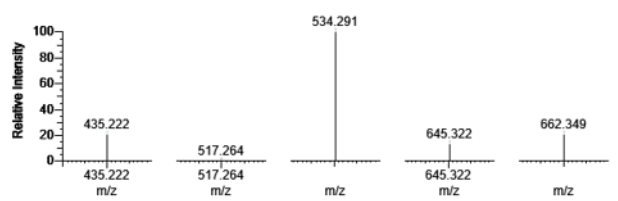

P25  
A157 Sample

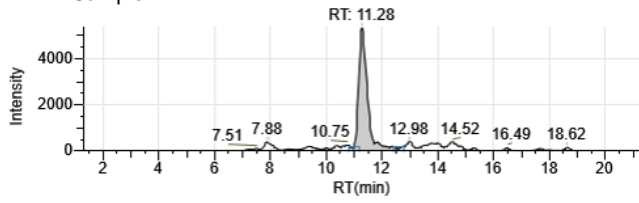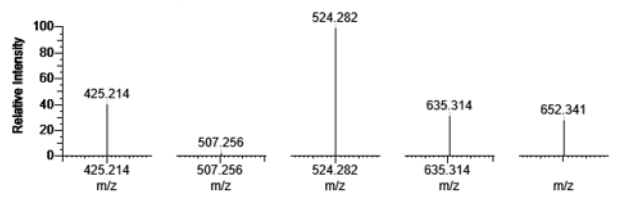

A157 MS-QBIC

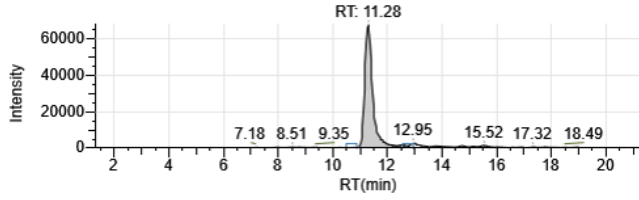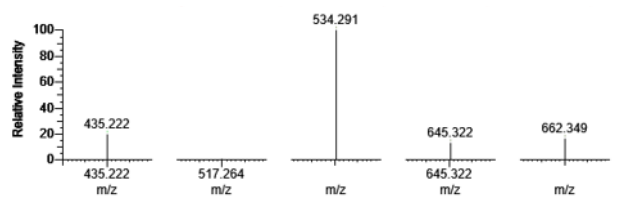

P26  
A128 Sample

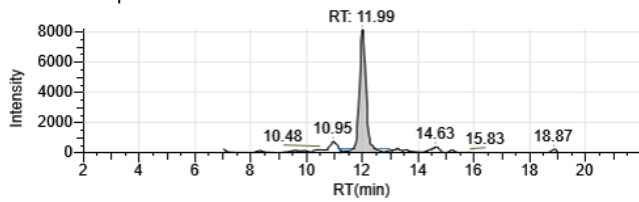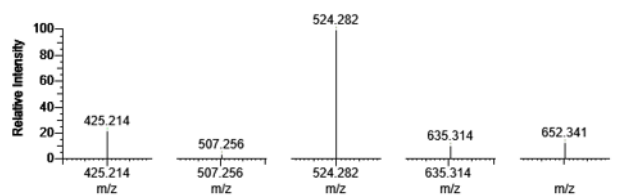

A128 MS-QBIC

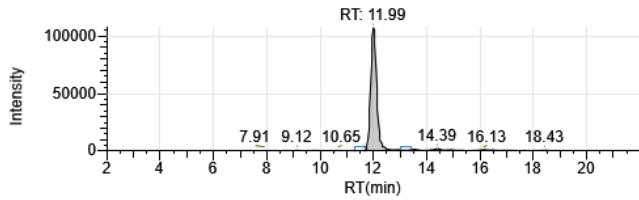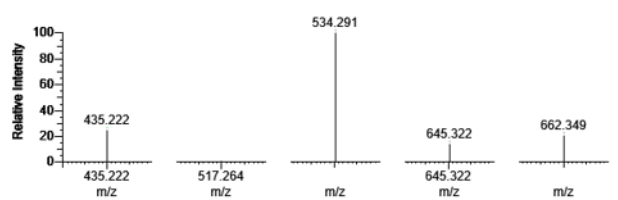

P27  
A142 Sample

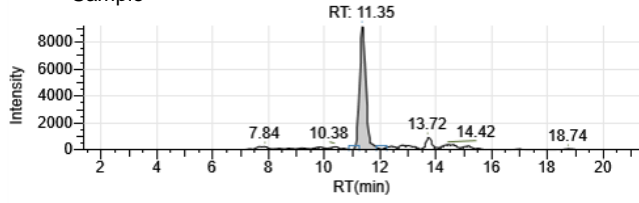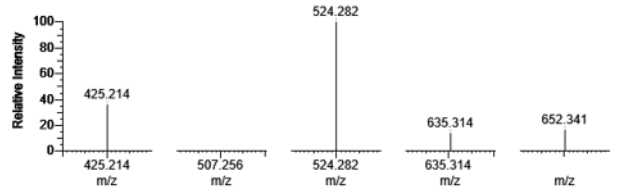

A142 MS-QBIC

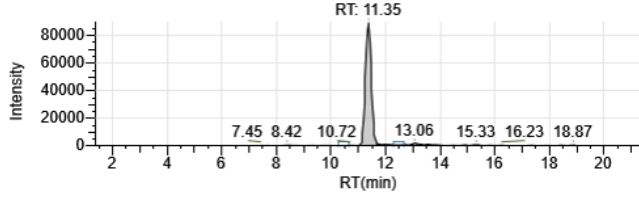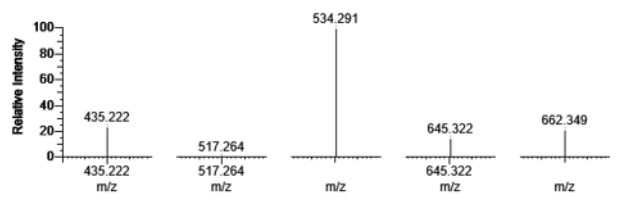

P28  
A151 Sample

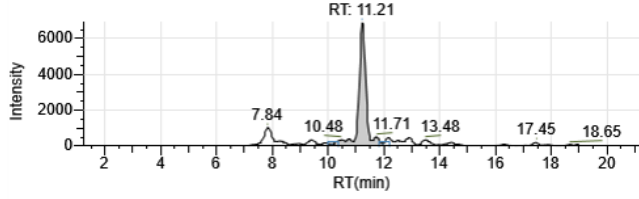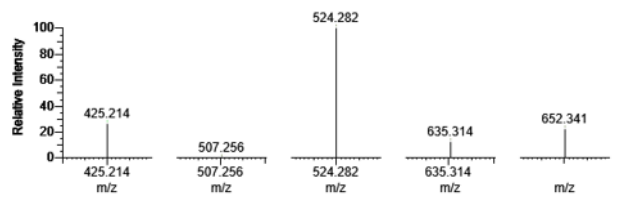

A151 MS-QBIC

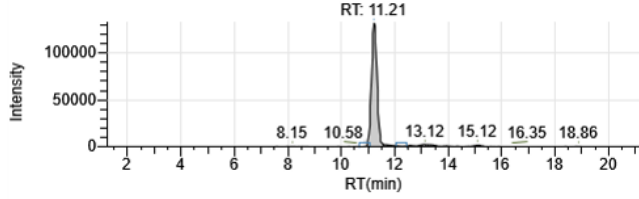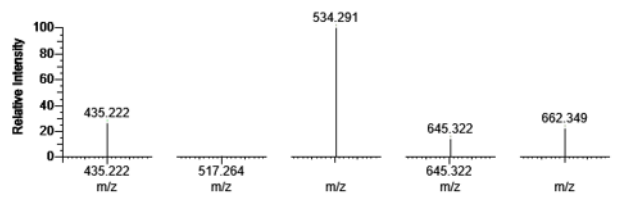

P29  
A139 Sample

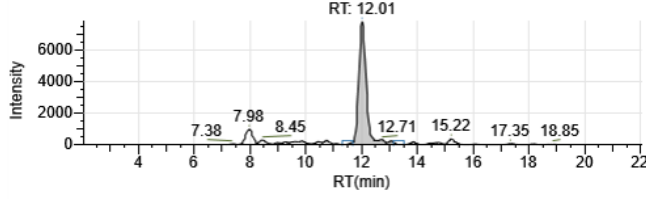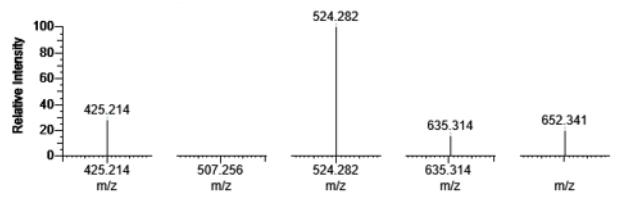

A139 MS-QBIC

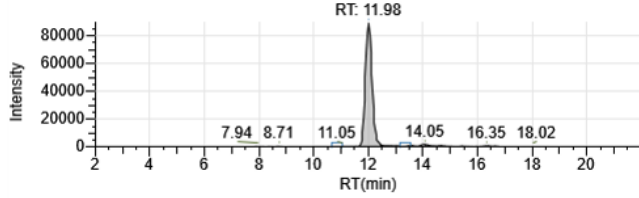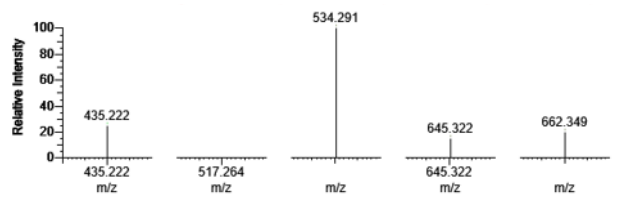

P30  
A163 Sample

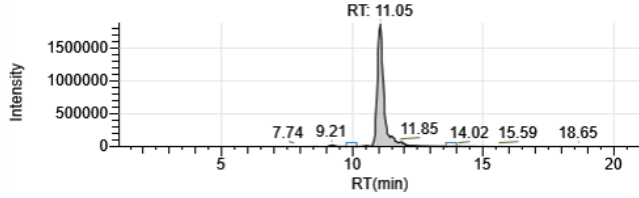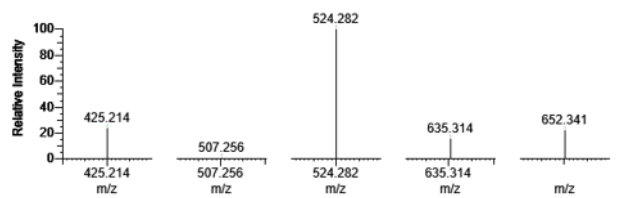

A163 MS-QBIC

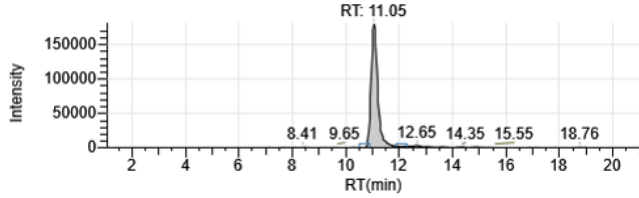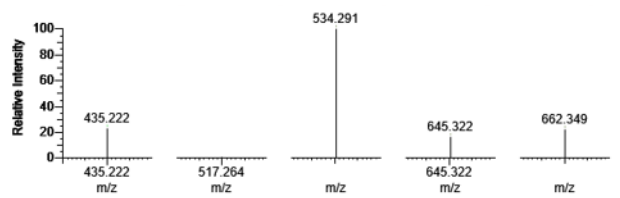



# R Apo A1 (DLATVYVDVLK) Another organ

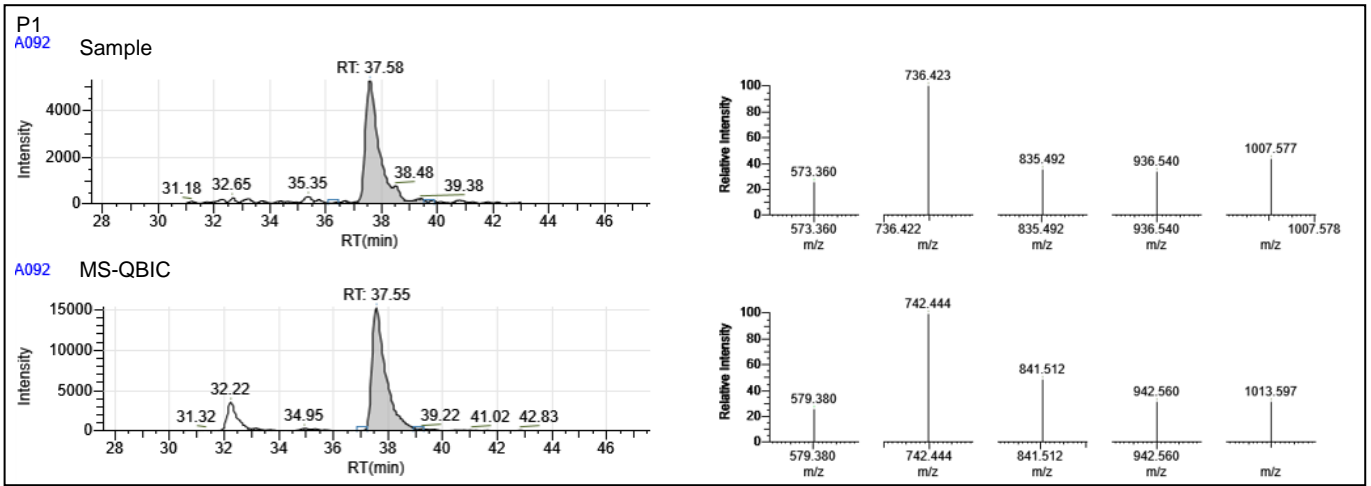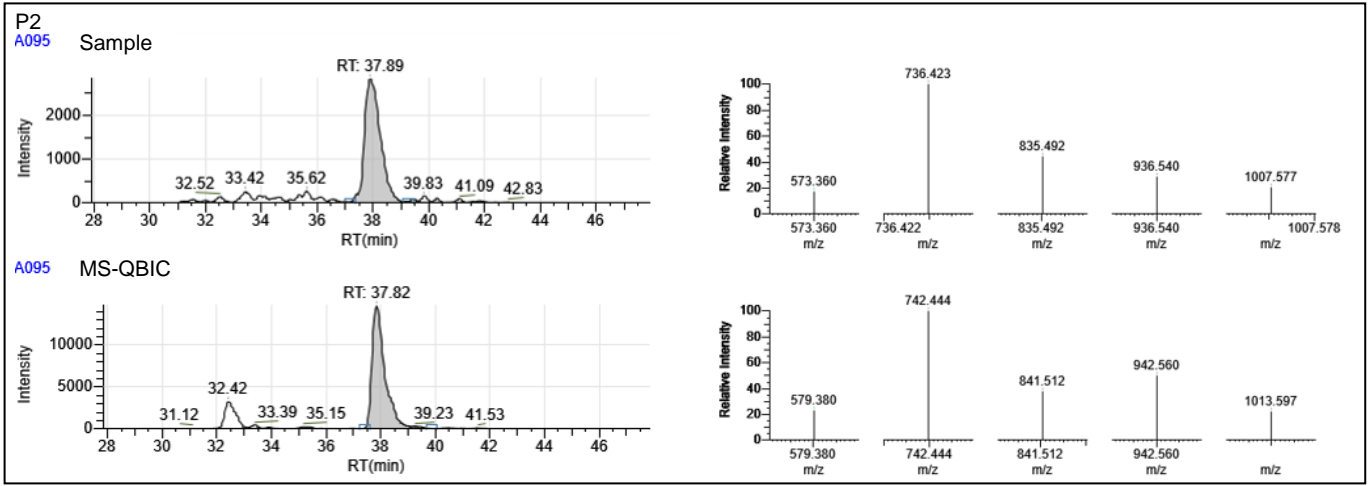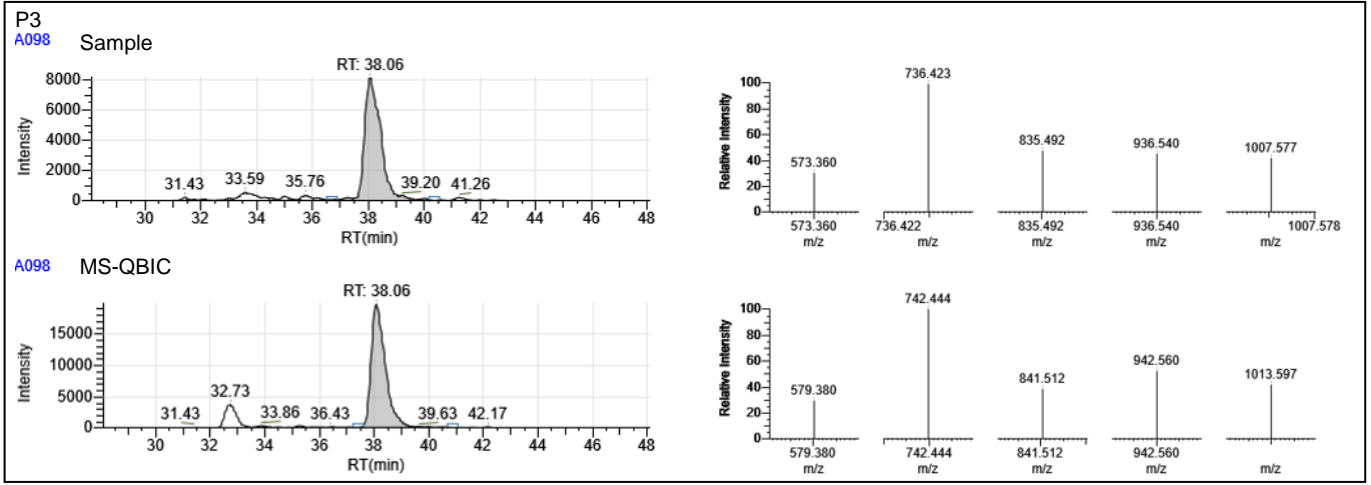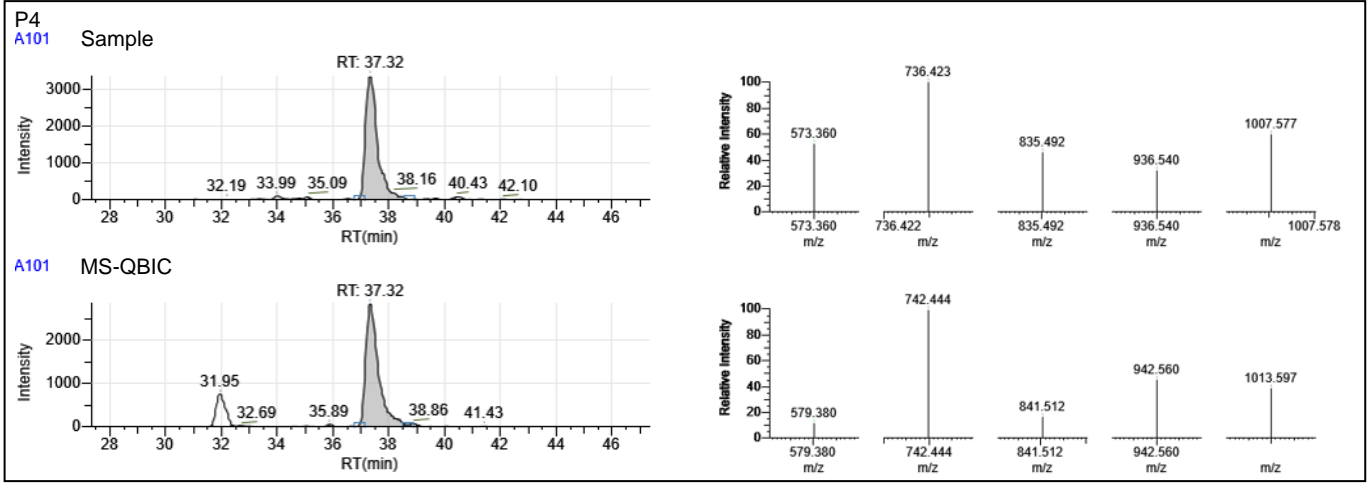

P6  
A107

Sample

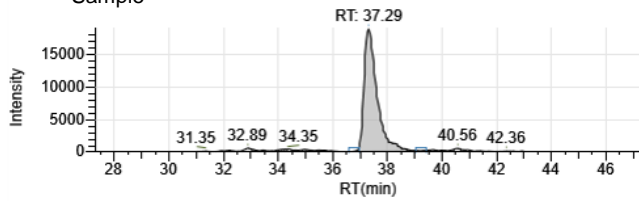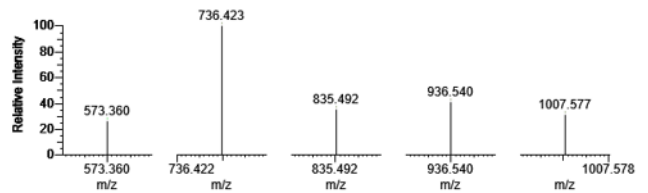

A107

MS-QBIC

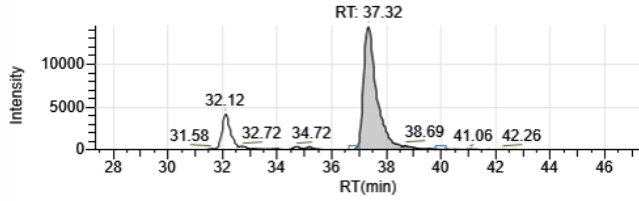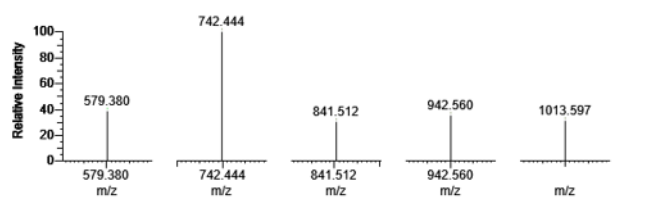

P7

A161

Sample

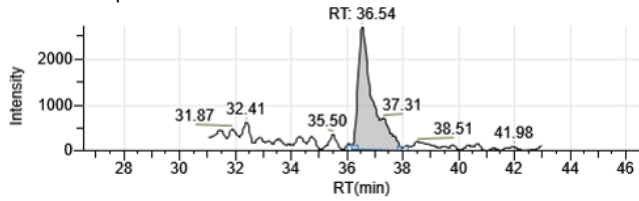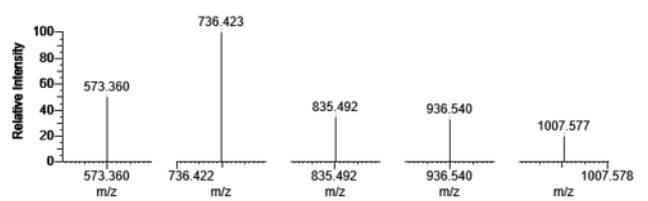

A161

MS-QBIC

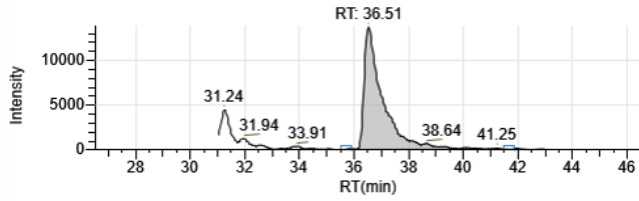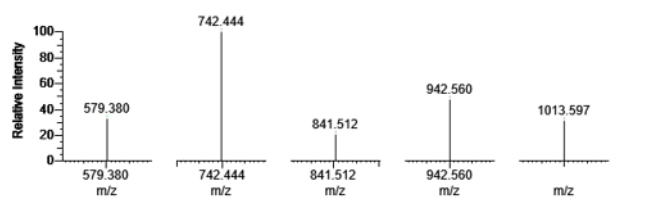

P8

A110

Sample

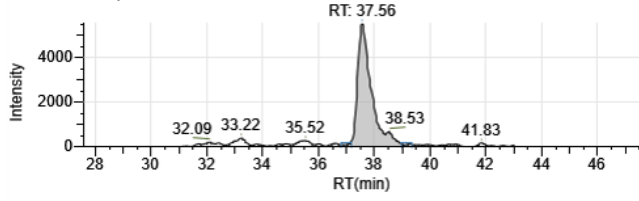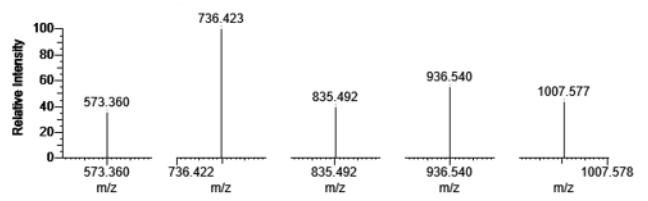

A110

MS-QBIC

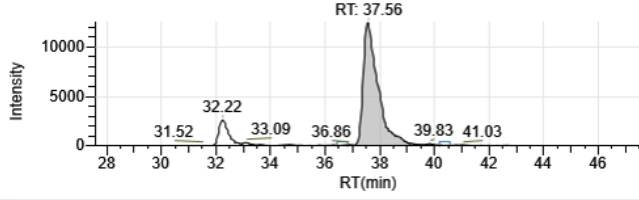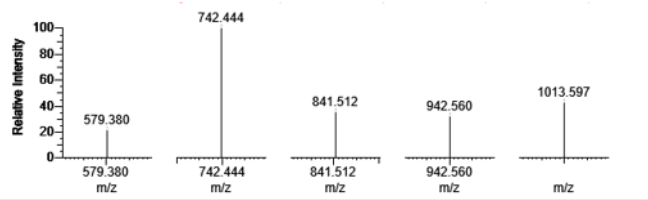

P9

A112

Sample

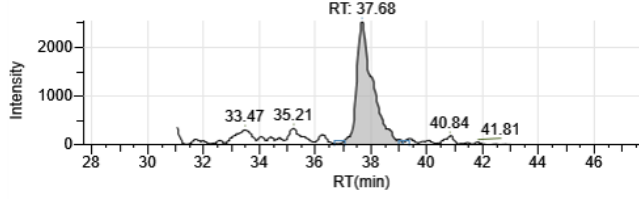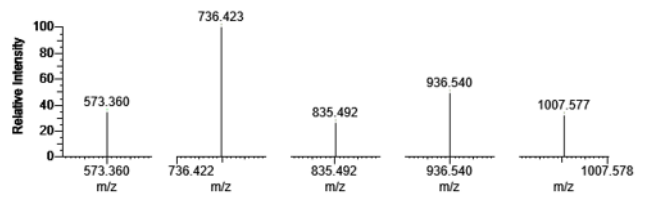

A112

MS-QBIC

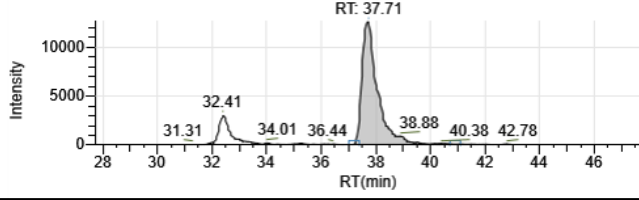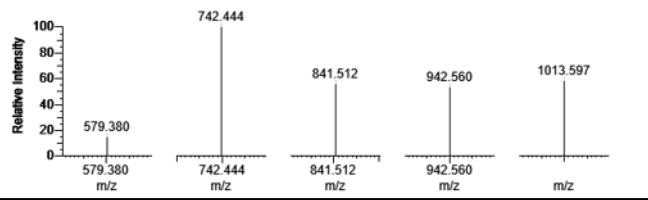

P13  
A119 Sample

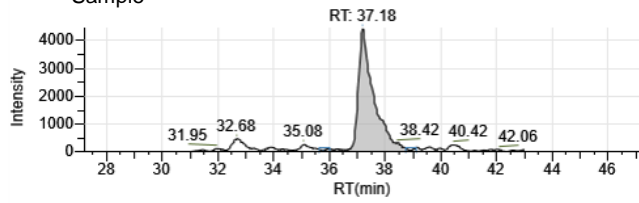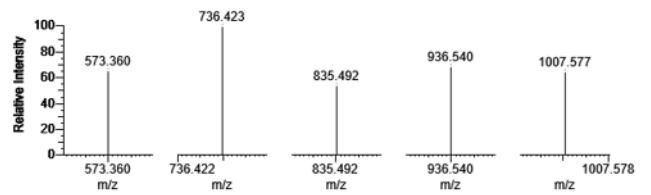

A119 MS-QBIC

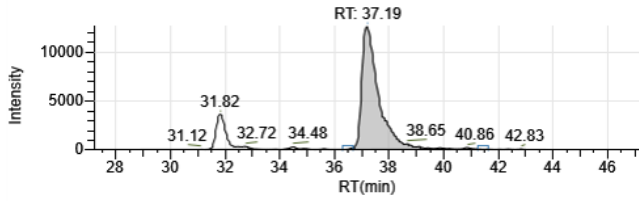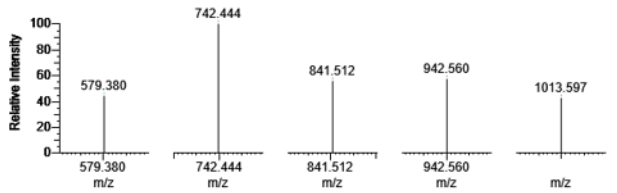

P14  
A121 Sample

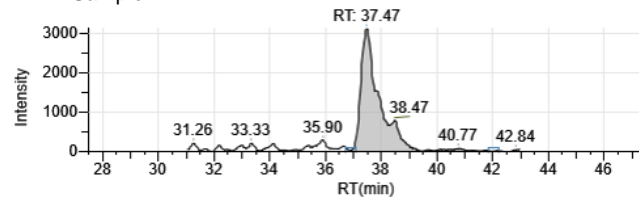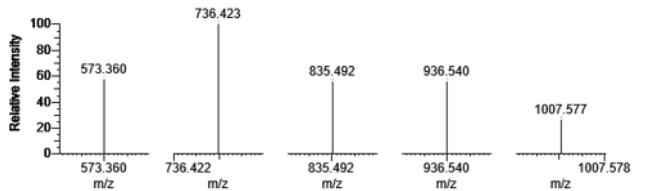

A12 MS-QBIC

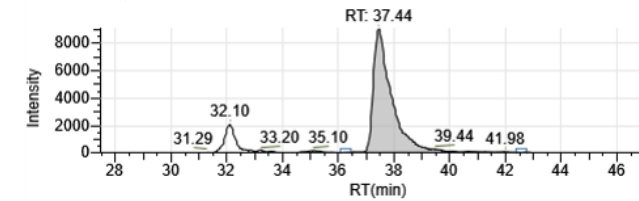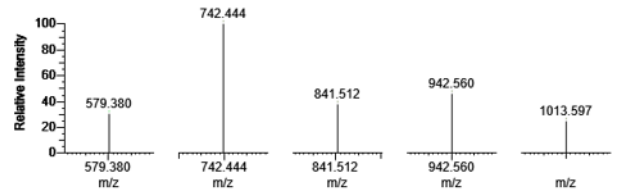

P15  
A171 Sample

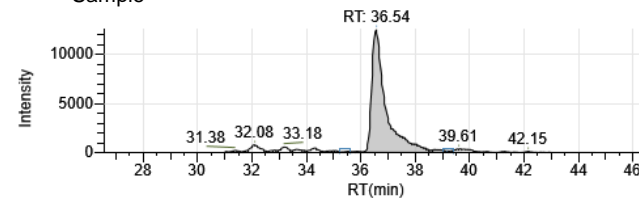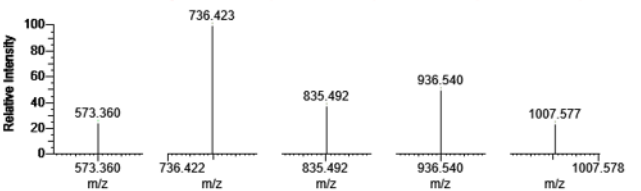

A170 MS-QBIC

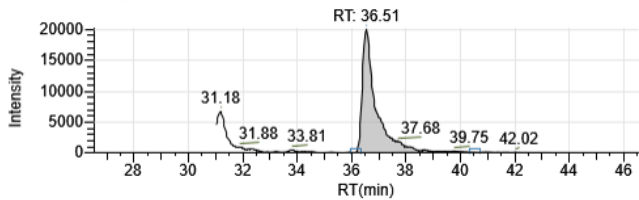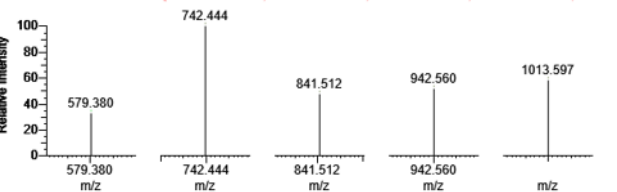

P17  
A131 Sample

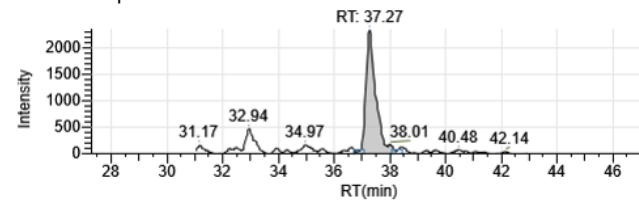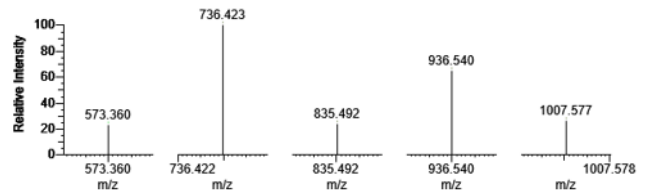

A130 MS-QBIC

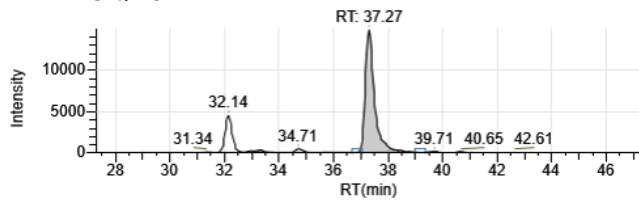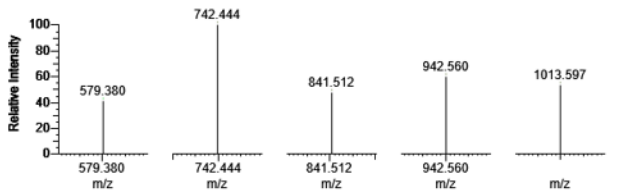

P18  
A134

Sample

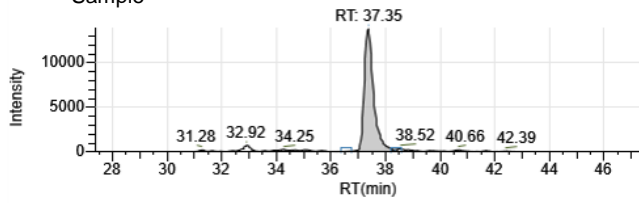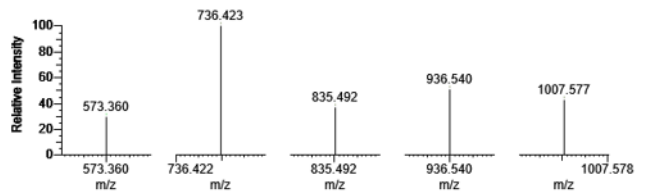

A134 MS-QBIC

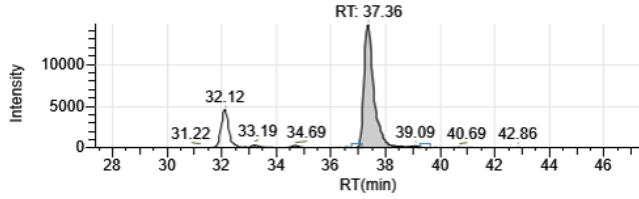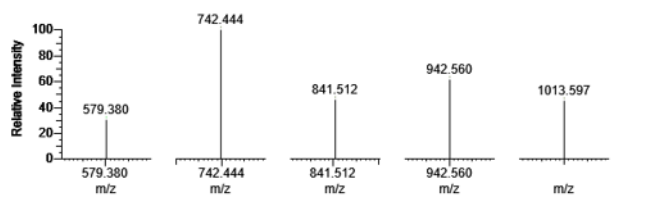

P19  
A137

Sample

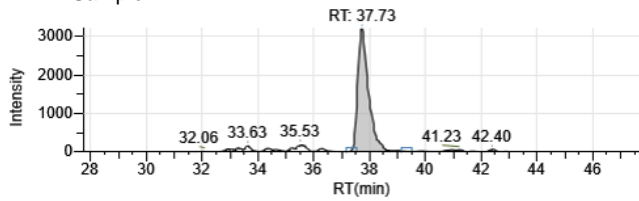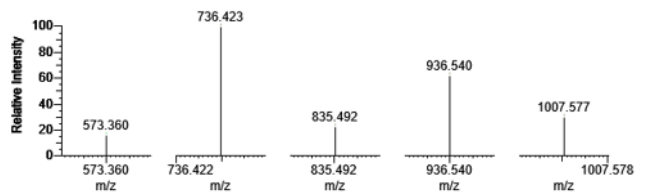

A137 MS-QBIC

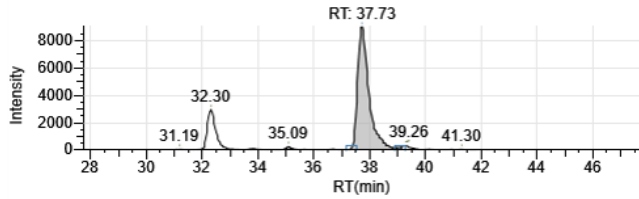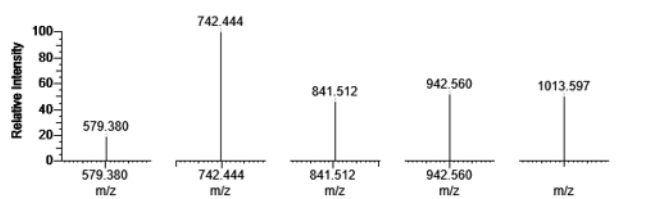

P20  
A146

Sample

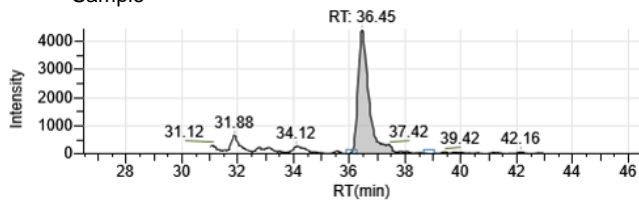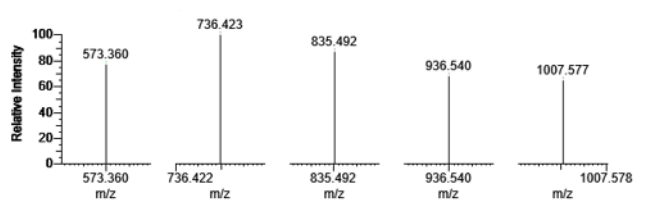

A146 MS-QBIC

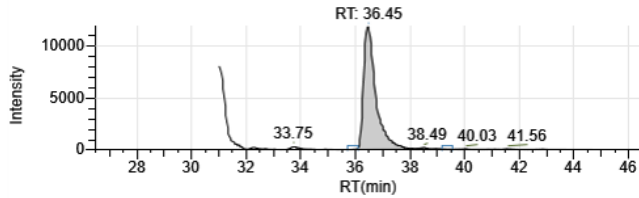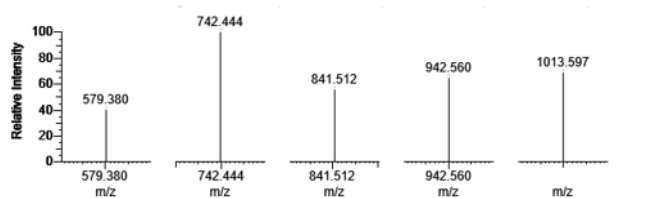

P23  
A167

Sample

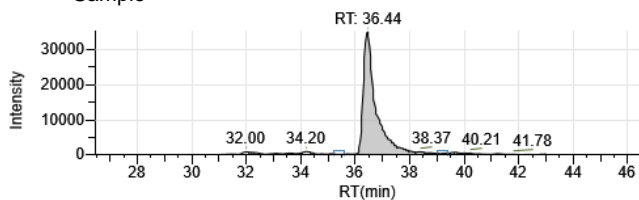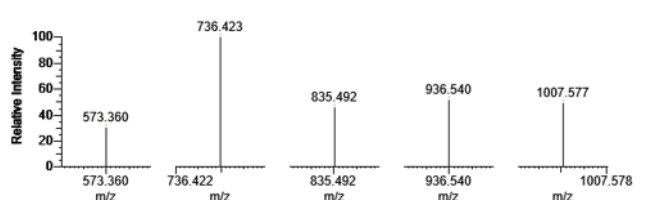

A167 MS-QBIC

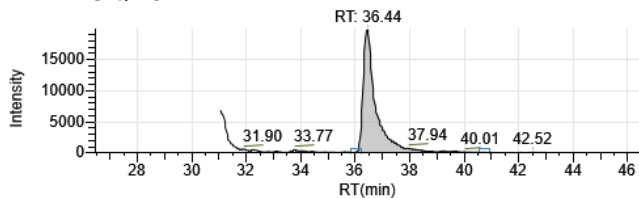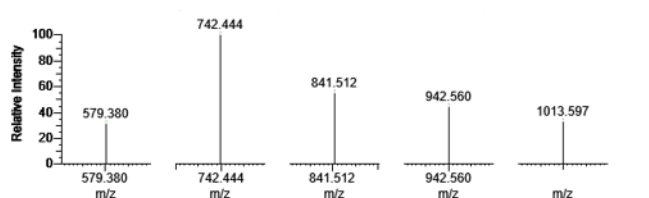

P25  
A158

Sample

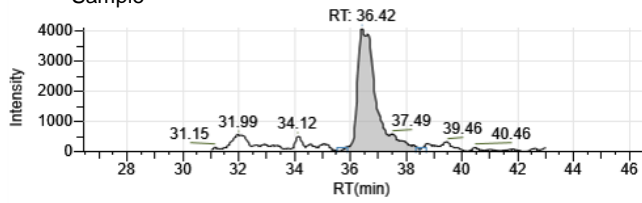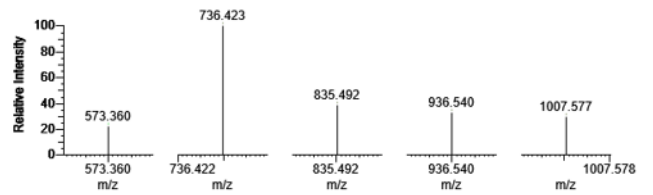

A158 MS-QBIC

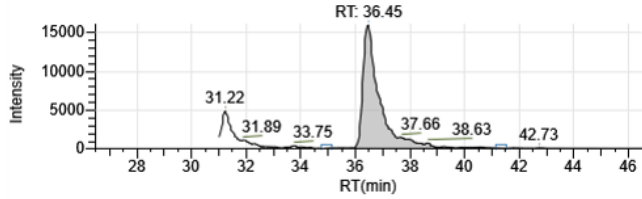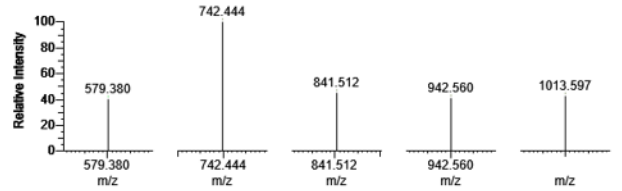

P27  
A143

Sample

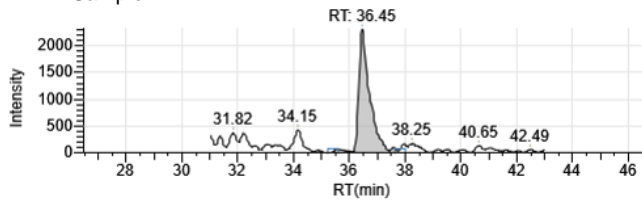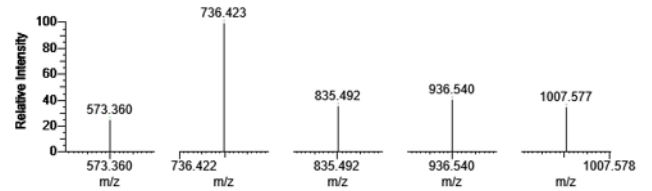

A143 MS-QBIC

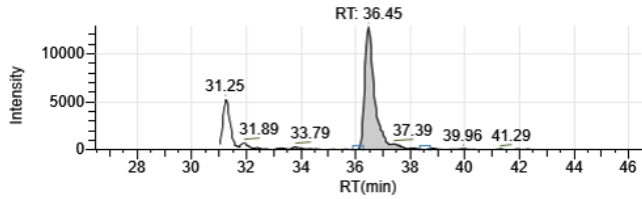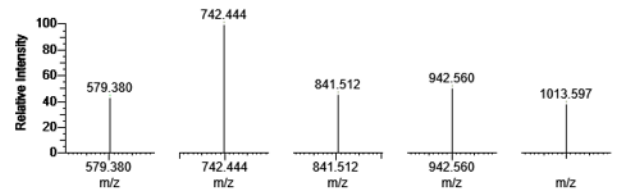

P28  
A152

Sample

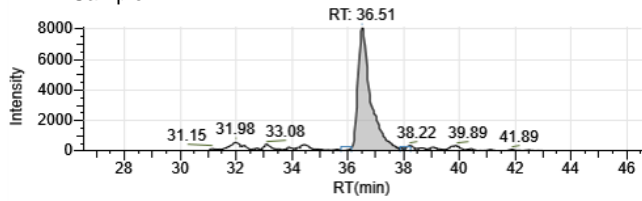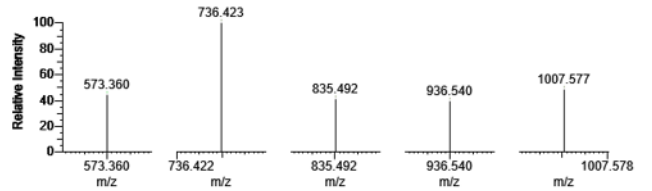

A152 MS-QBIC

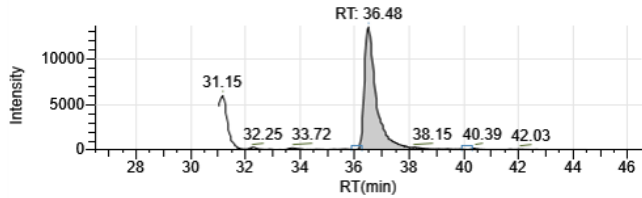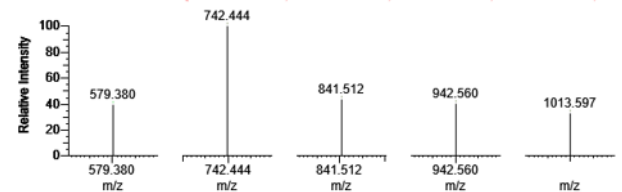

P29  
A140

Sample

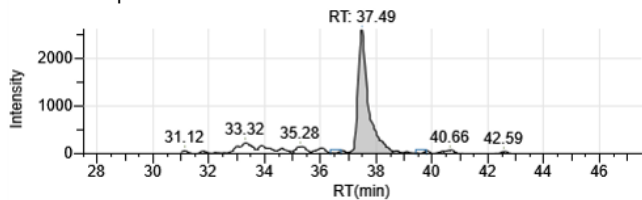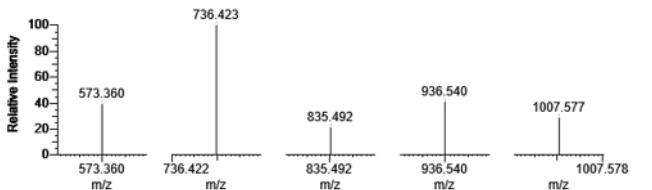

A140 MS-QBIC

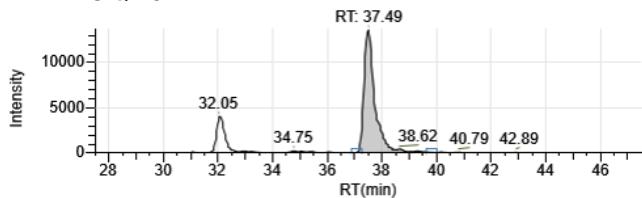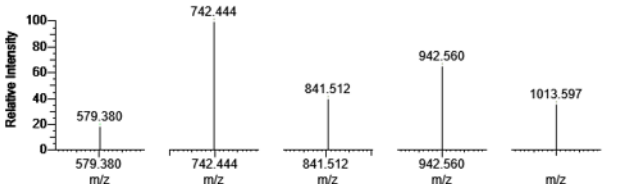

P30  
A164

Sample

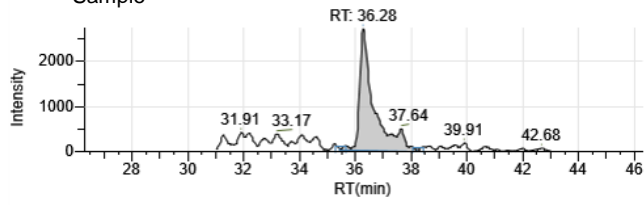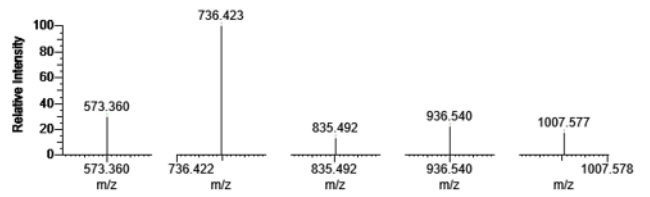

A164 MS-QBIC

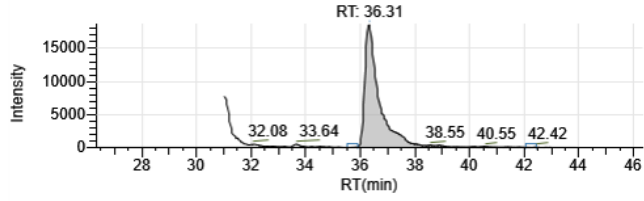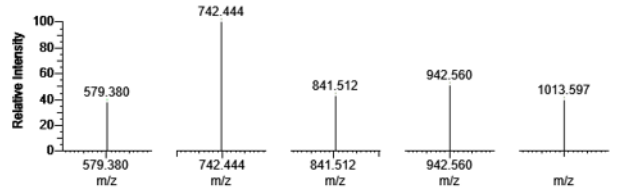

# S Apo A2 (EQLTPLIK) Another organ

P15  
A170

Sample

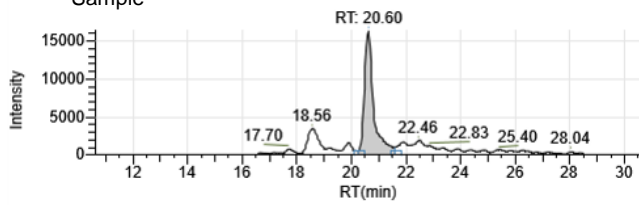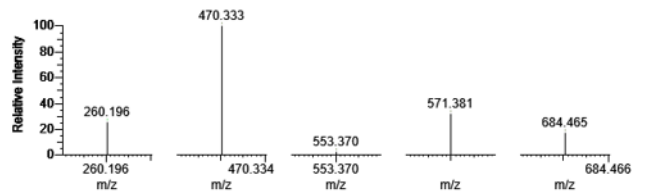

A170 MS-QBIC

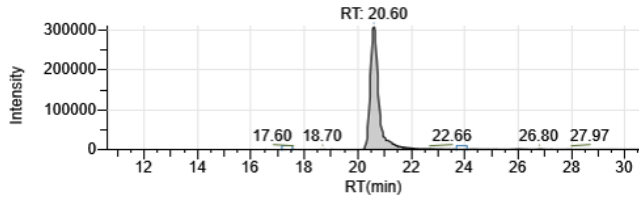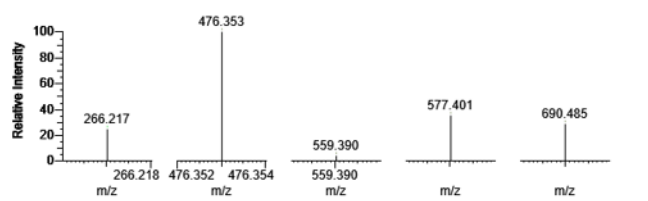

P23

A166

Sample

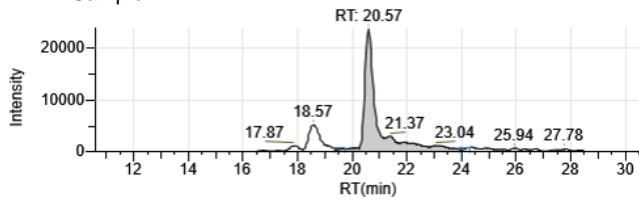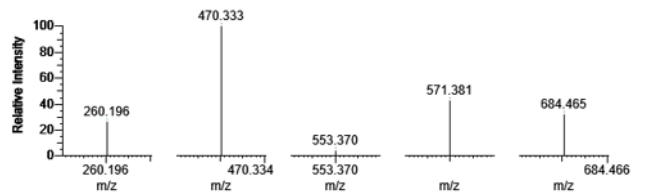

A166 MS-QBIC

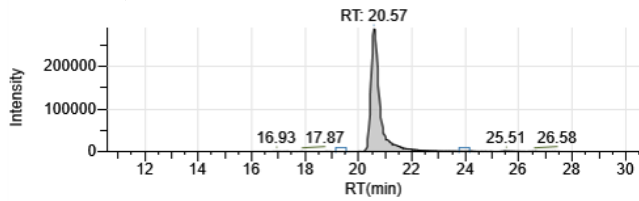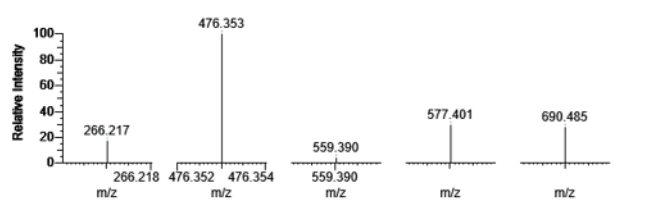

# T Apo A4 (LAPLAEDVR) Another organ

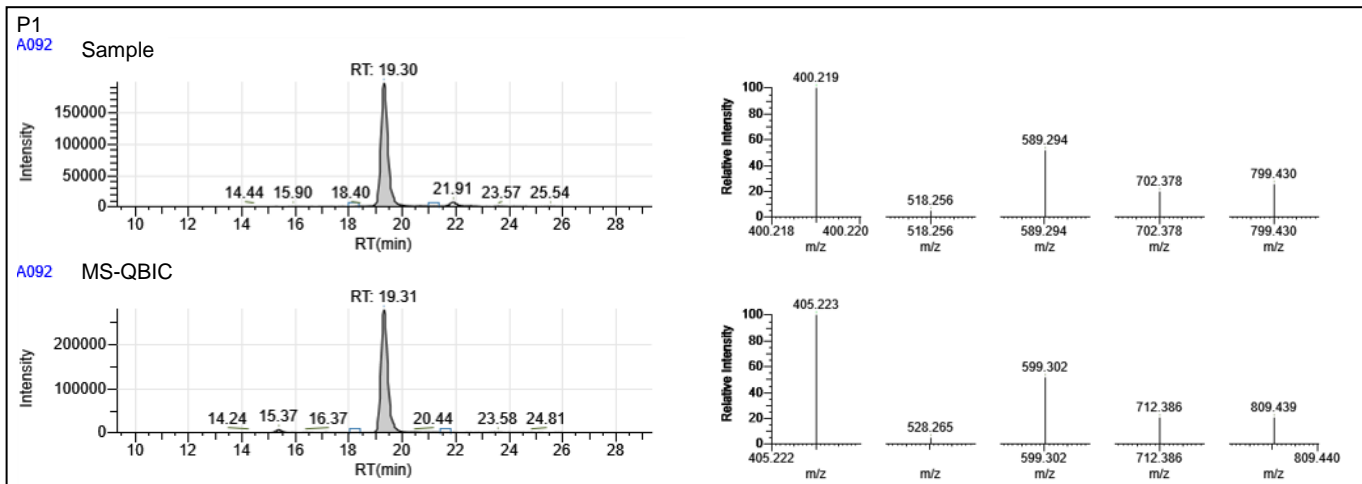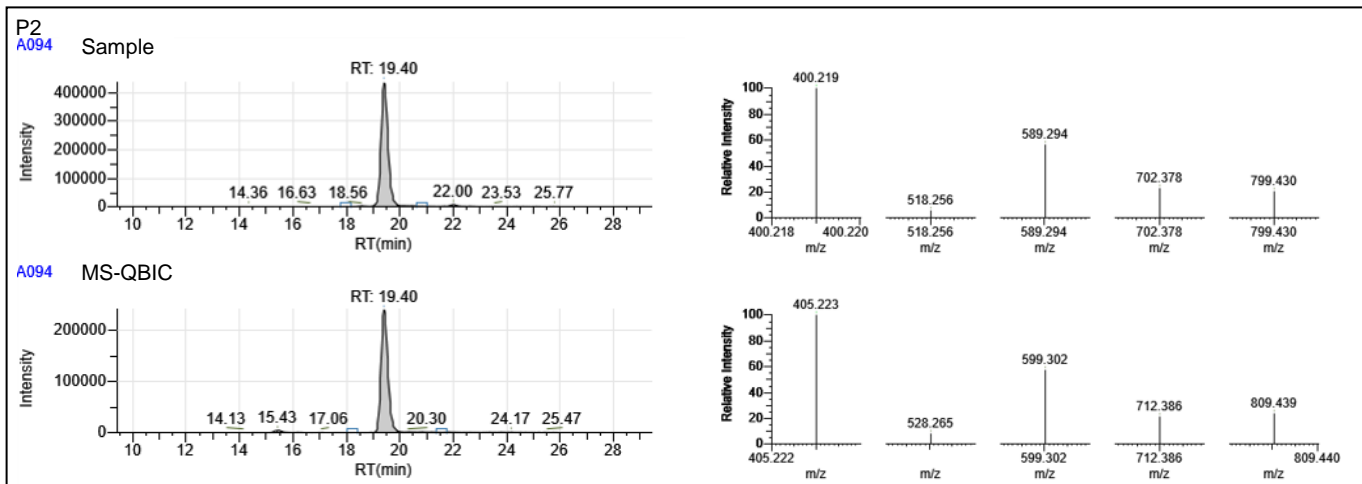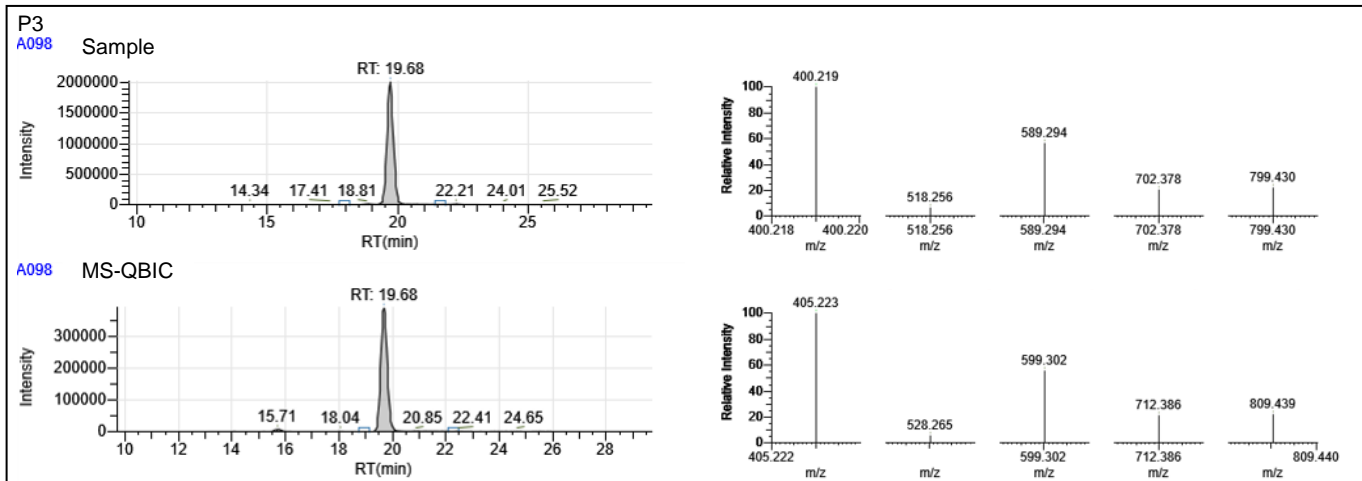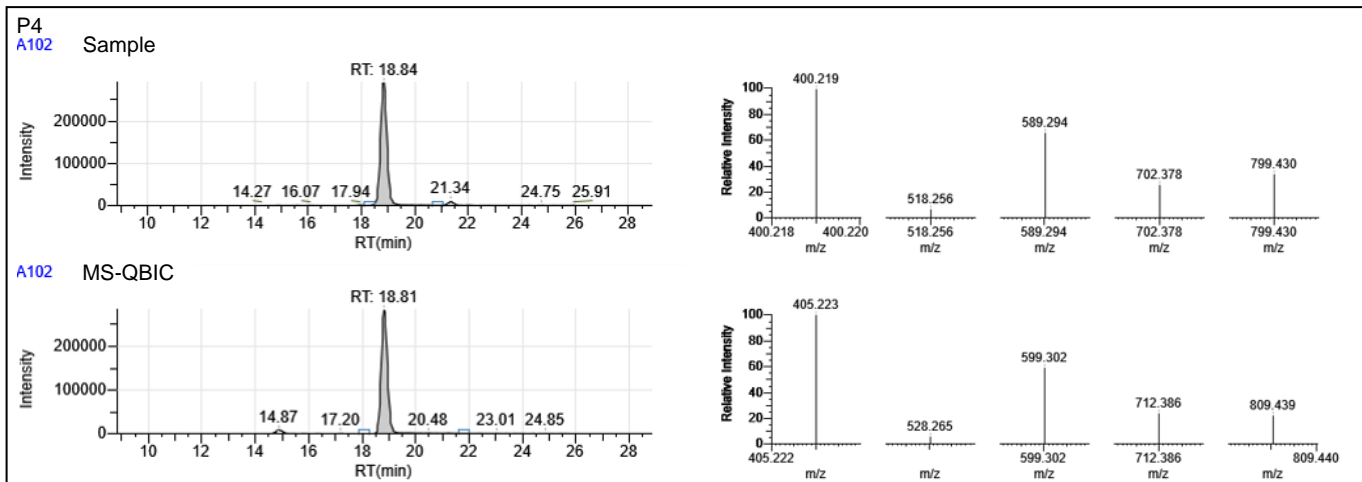



P5  
A105 Sample

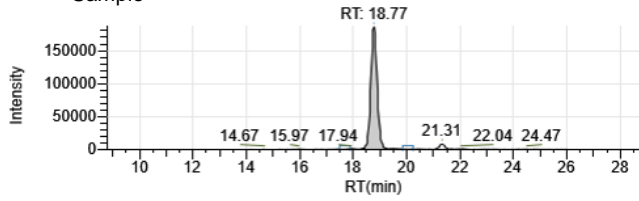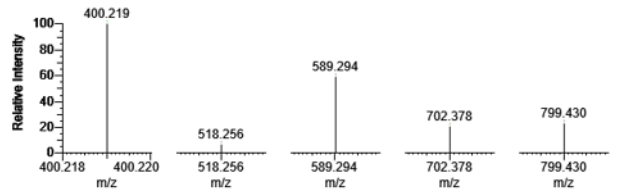

A105 MS-QBIC

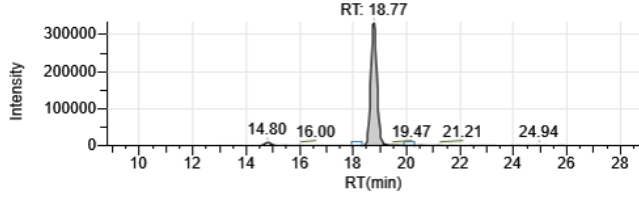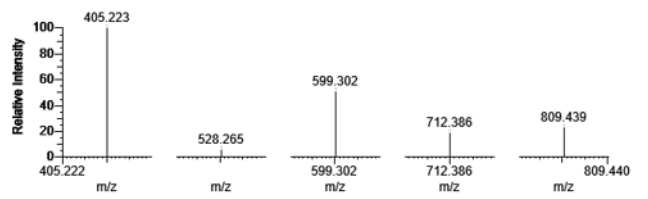

P6  
A107 Sample

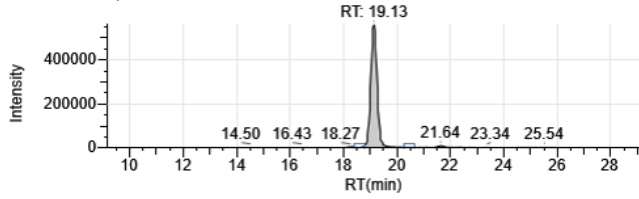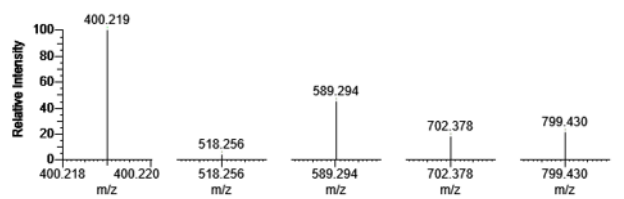

A107 MS-QBIC

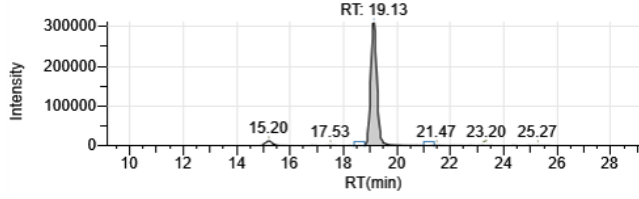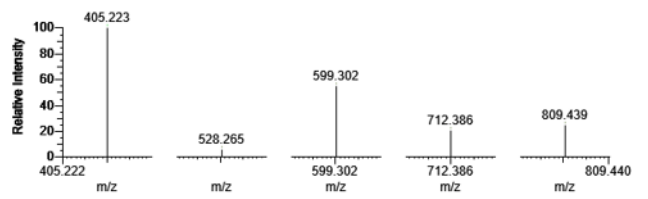

P7  
A161 Sample

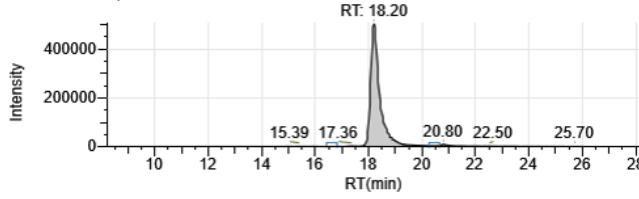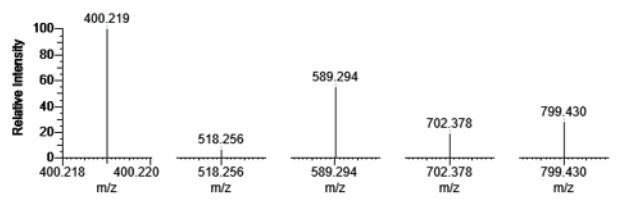

A161 MS-QBIC

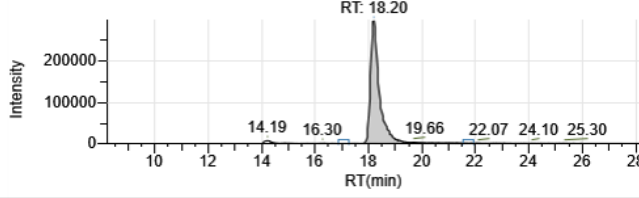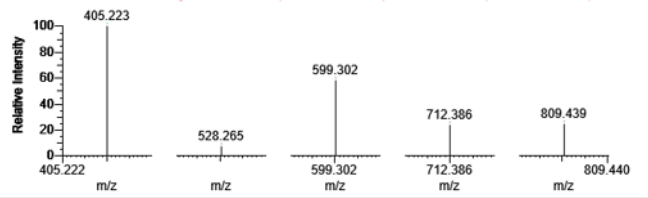

P8  
A110 Sample

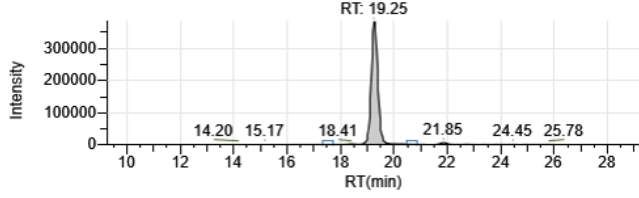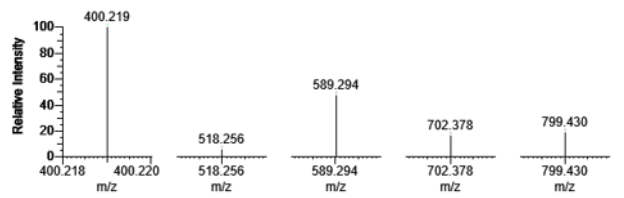

A110 MS-QBIC

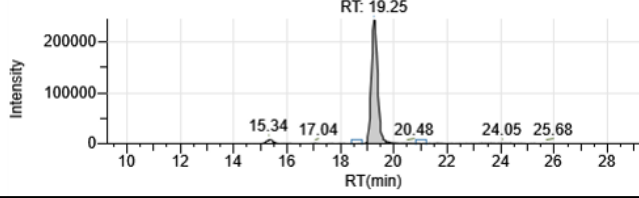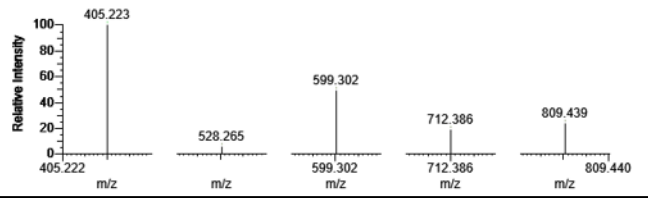

P9  
A114

Sample

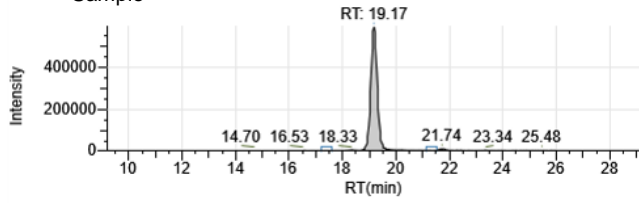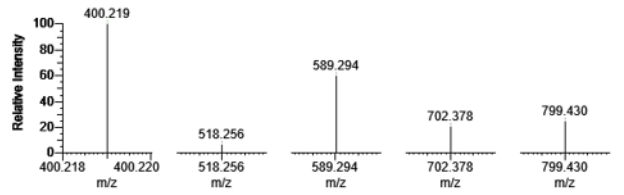

A114 MS-QBIC

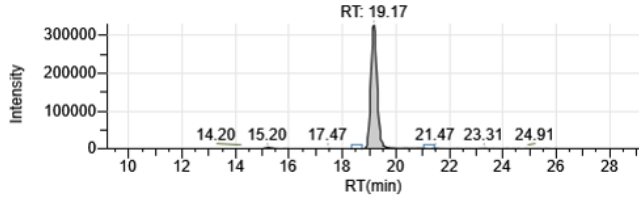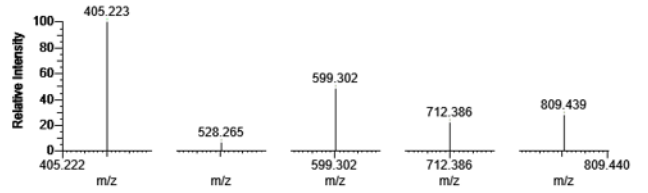

P10  
A116

Sample

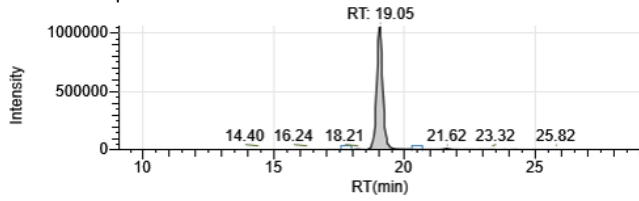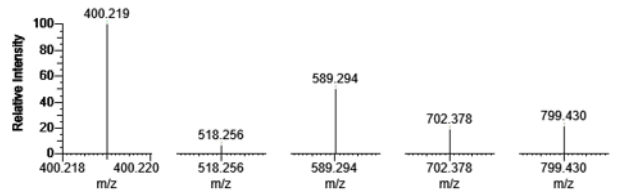

A116 MS-QBIC

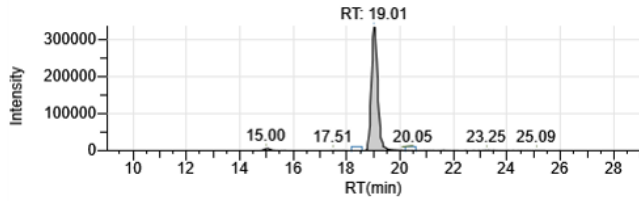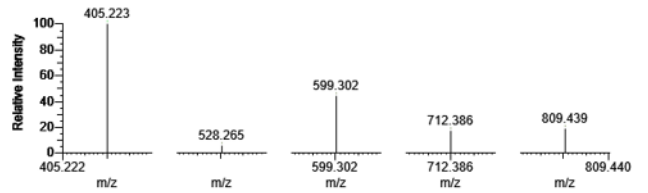

P13  
A120

Sample

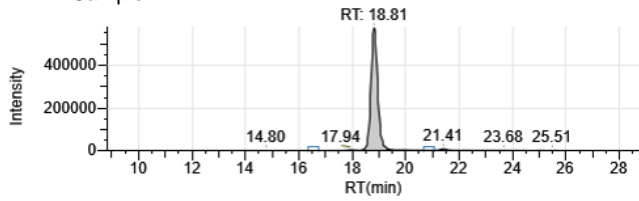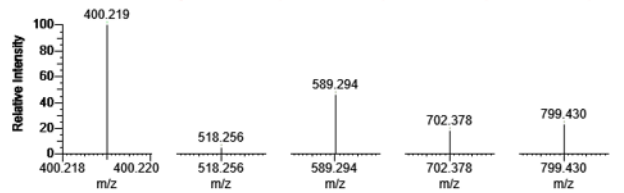

A120 MS-QBIC

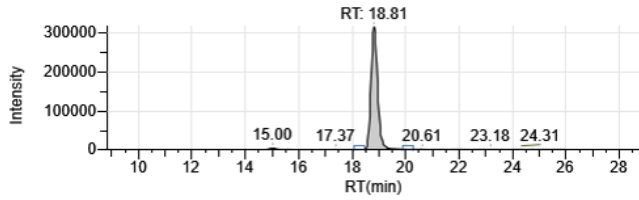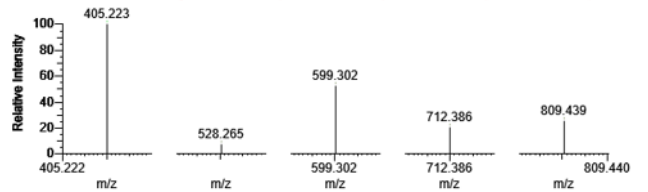

P14  
A121

Sample

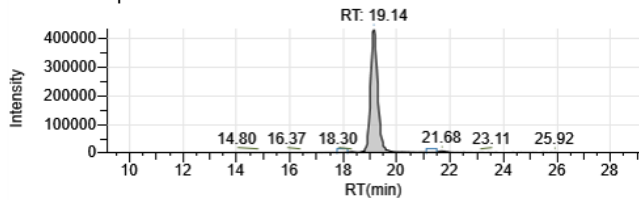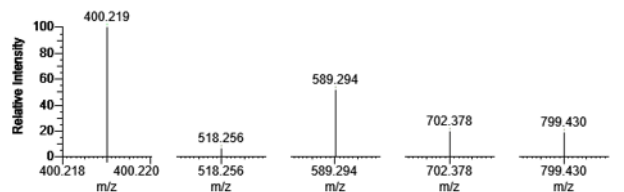

A121 MS-QBIC

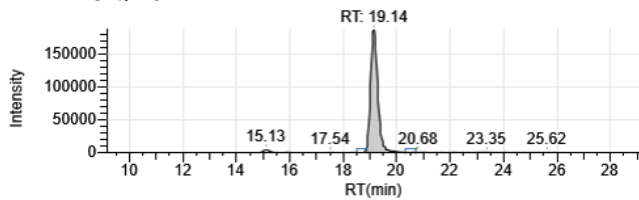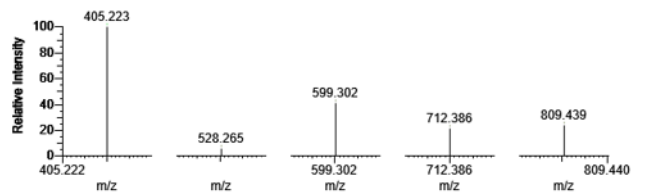

P15  
A170 Sample

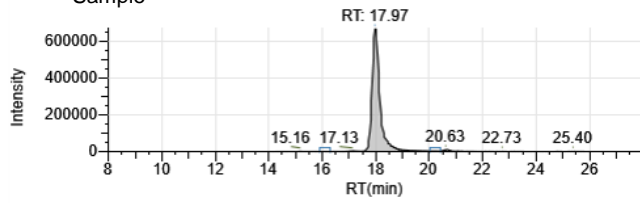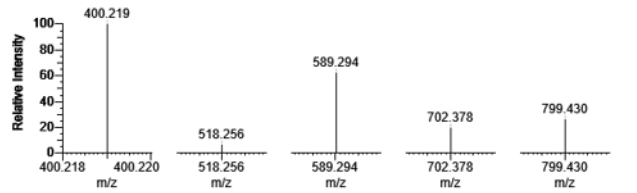

A170 MS-QBIC

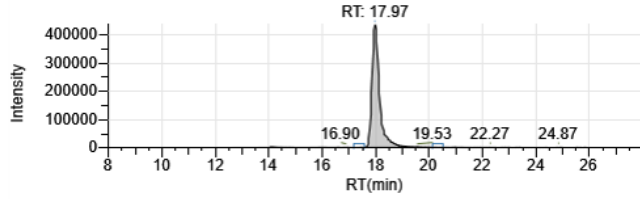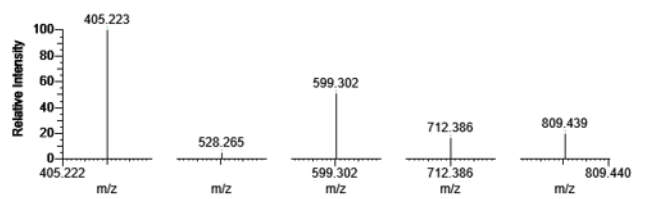

P16  
A173 Sample

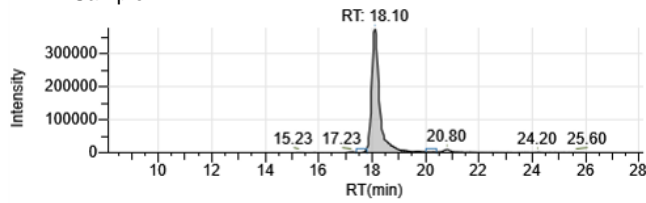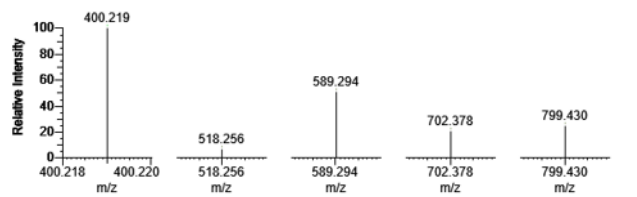

A173 MS-QBIC

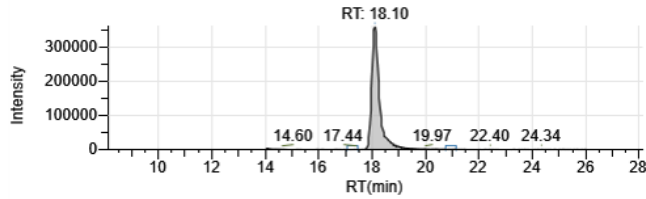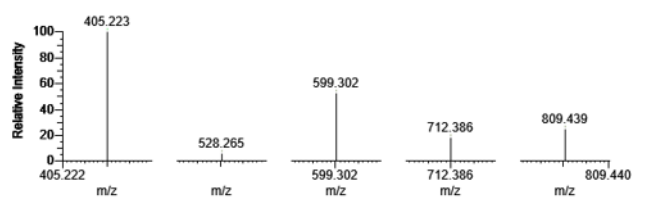

P17  
A131 Sample

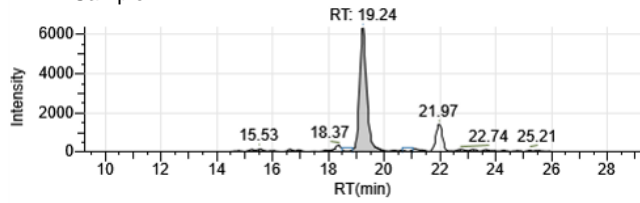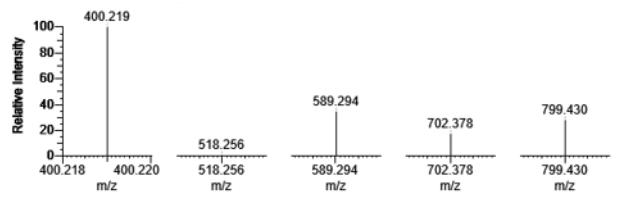

A131 MS-QBIC

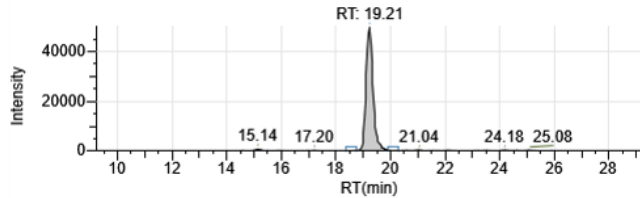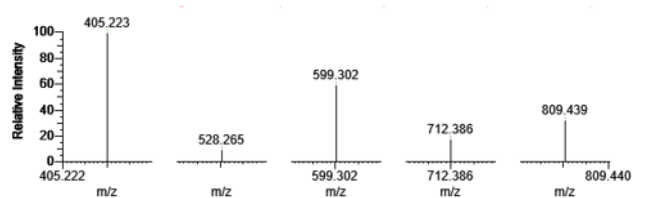

P18  
A134 Sample

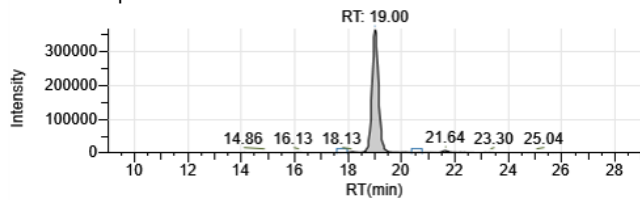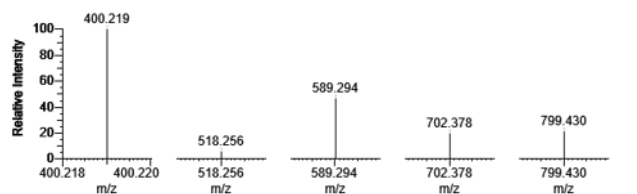

A134 MS-QBIC

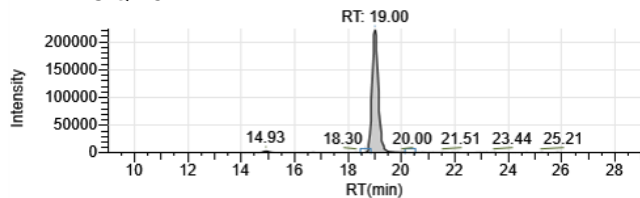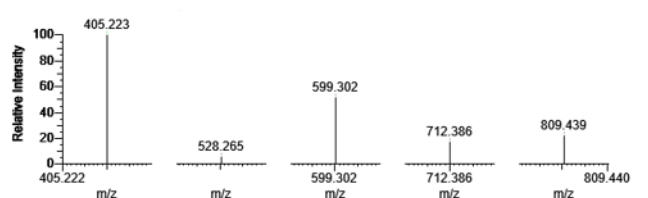

P19  
A136 Sample

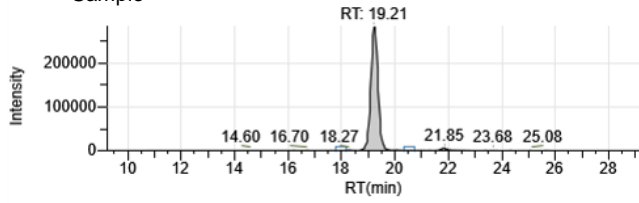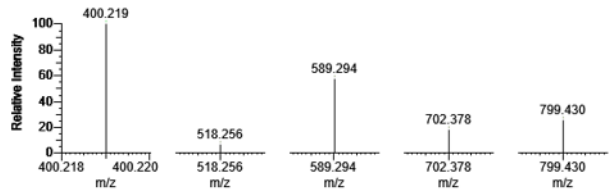

A136 MS-QBIC

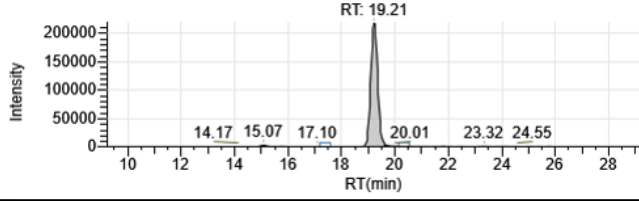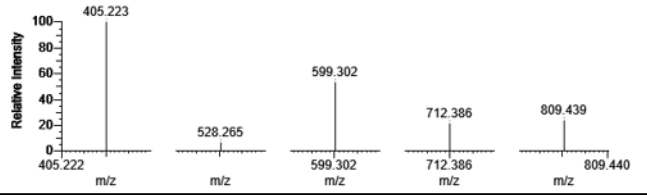

P20  
A146 Sample

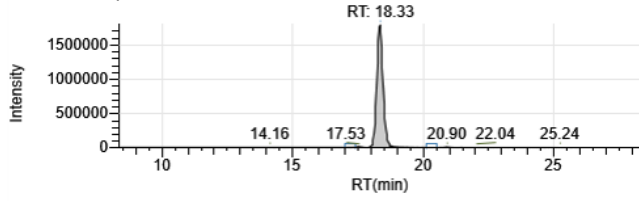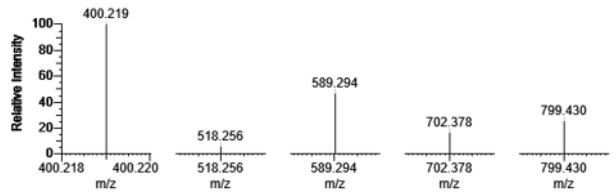

A146 MS-QBIC

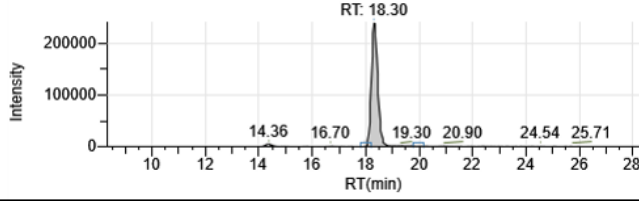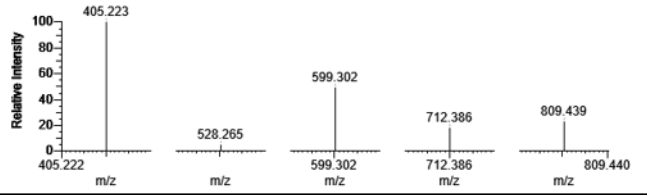

P21  
A149 Sample

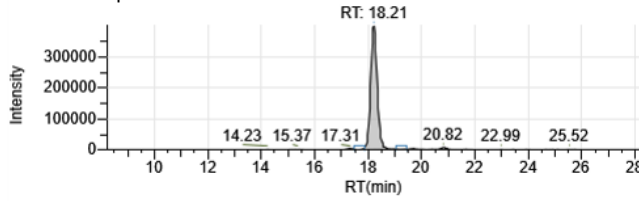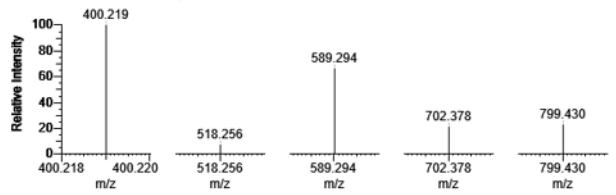

A149 MS-QBIC

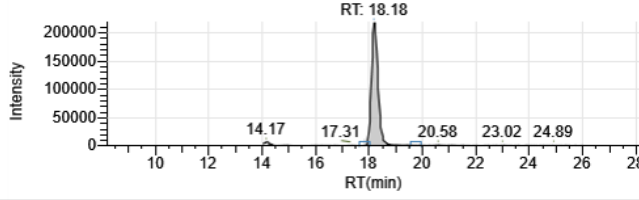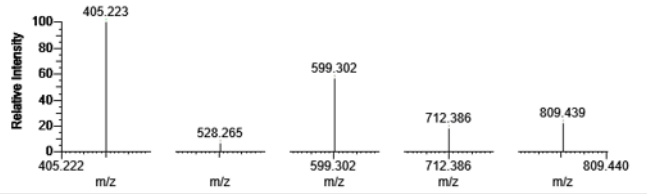

P22  
A124 Sample

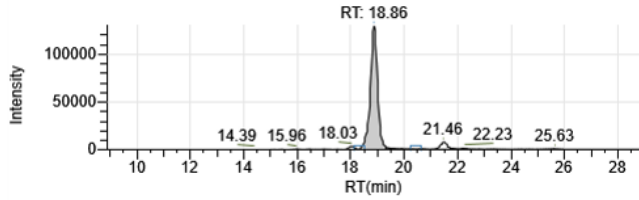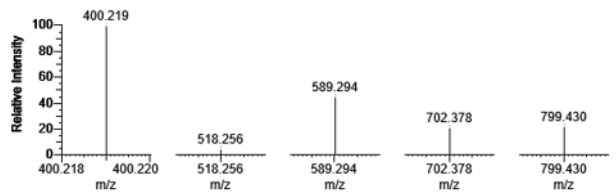

A124 MS-QBIC

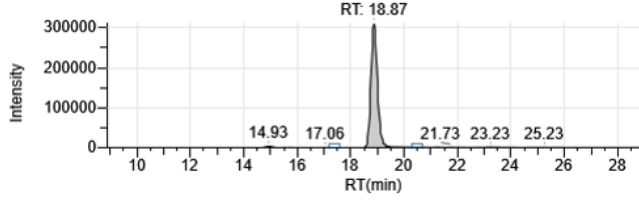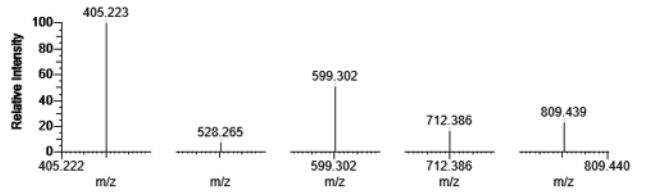

P23

A167

Sample

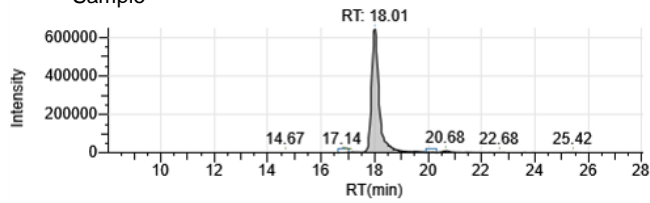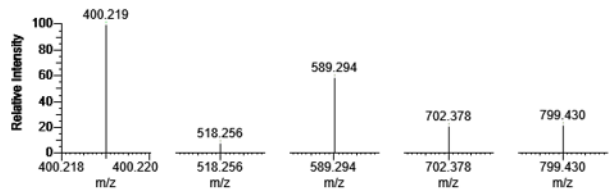

A167

MS-QBIC

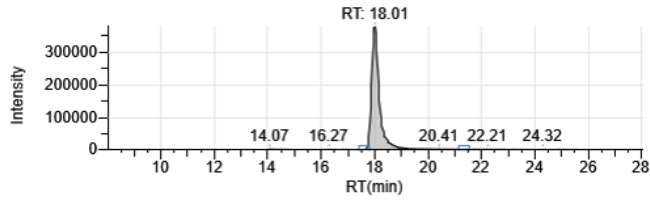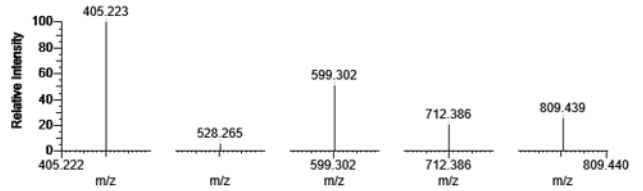

P24

A155

Sample

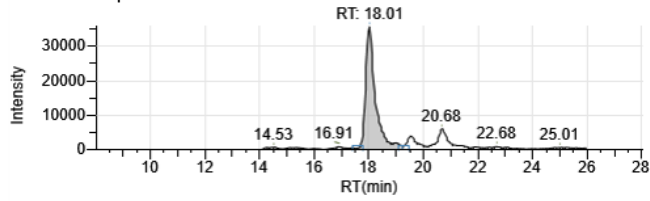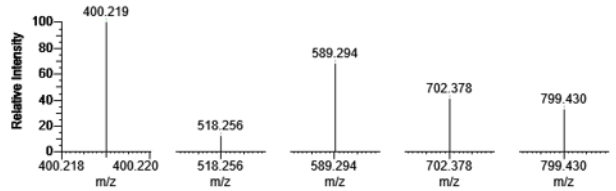

A155

MS-QBIC

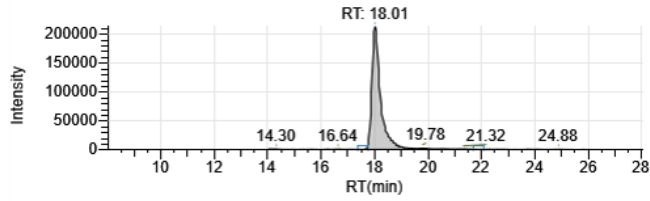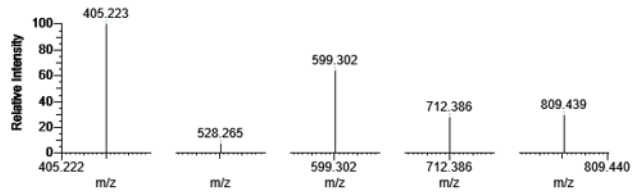

P25

A158

Sample

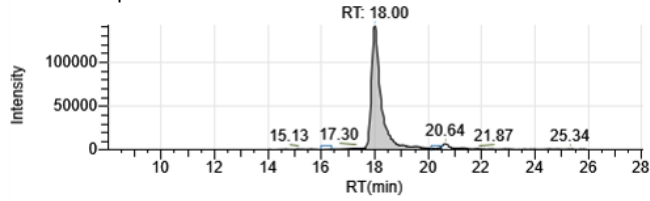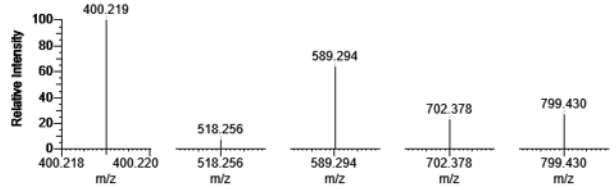

A158

MS-QBIC

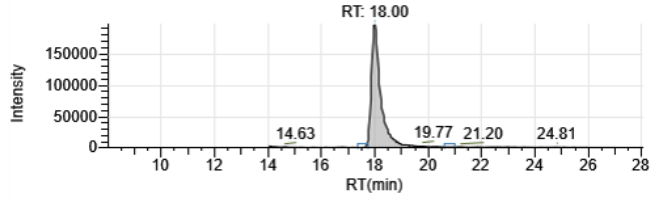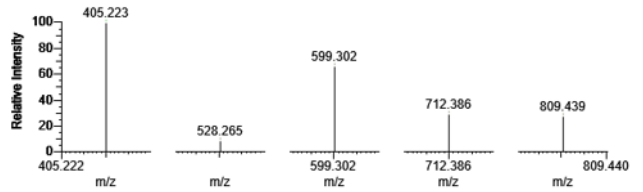

P26

A127

Sample

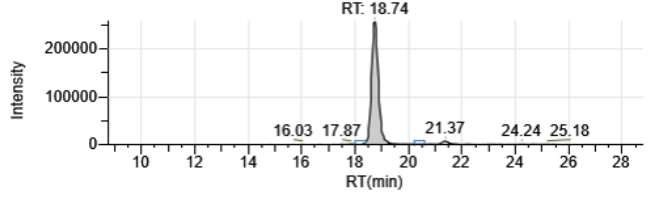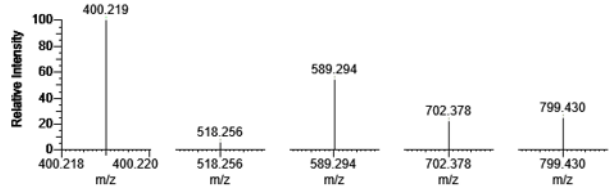

A127

MS-QBIC

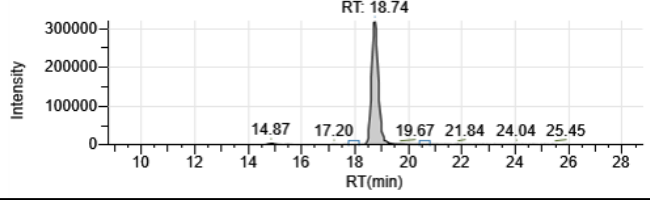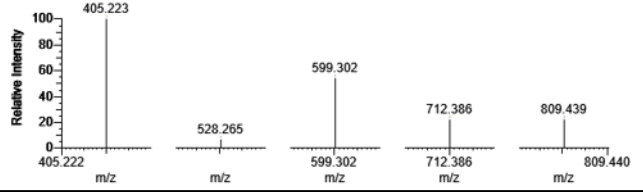

P27  
A143

Sample

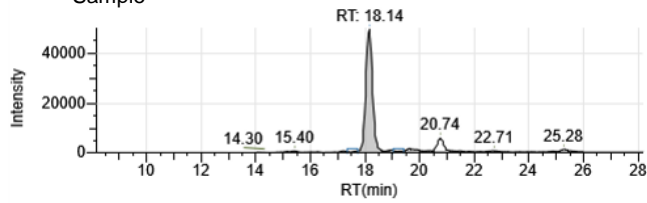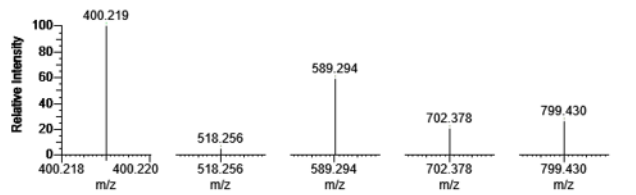

A143 MS-QBIC

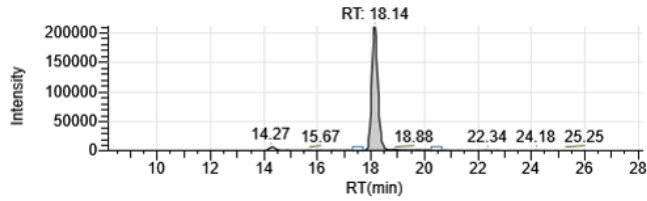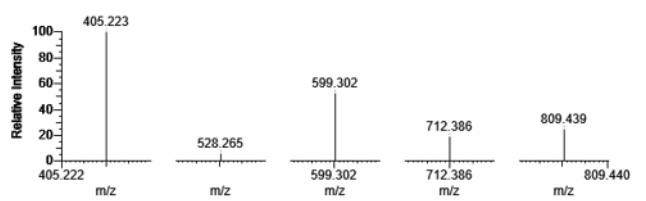

P28  
A152

Sample

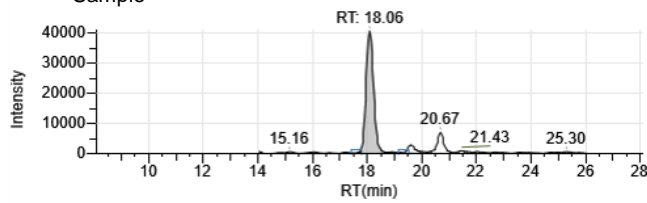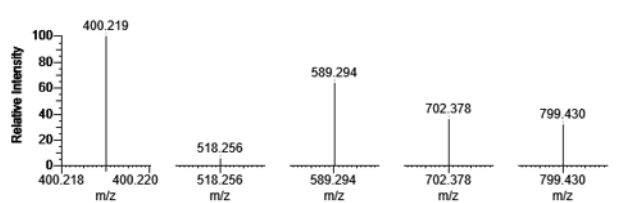

A152 MS-QBIC

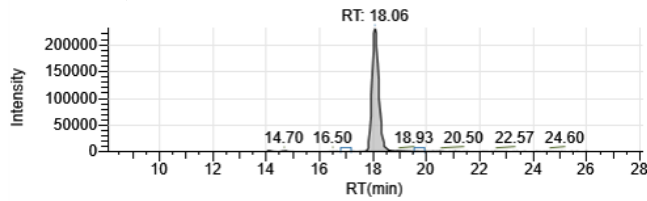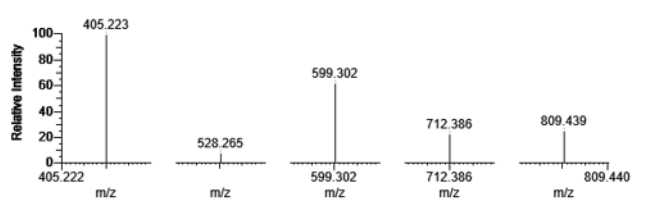

P29  
A140

Sample

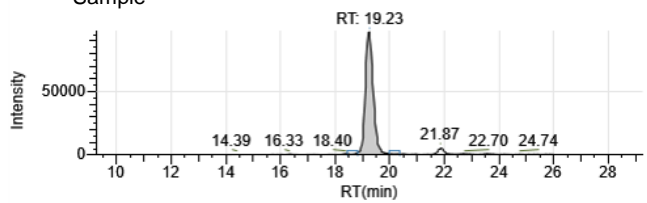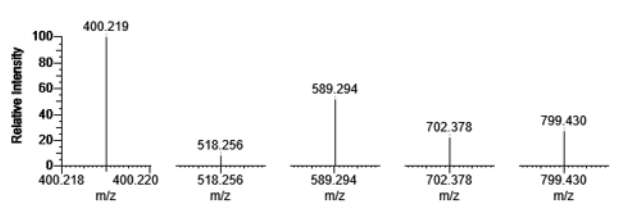

A140 MS-QBIC

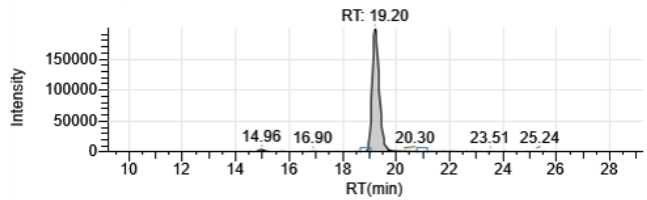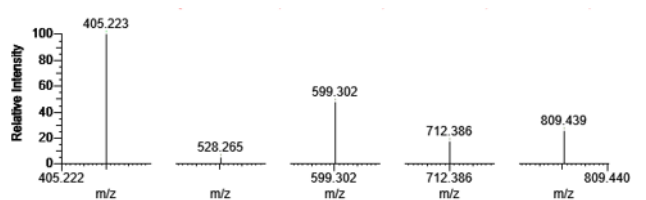

P30  
A163

Sample

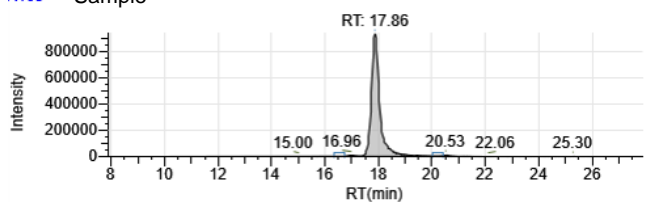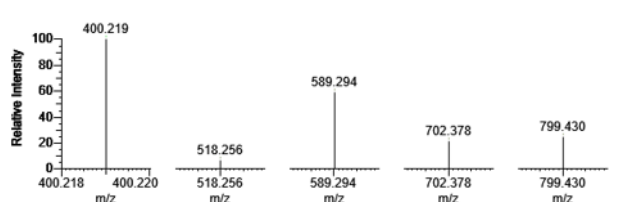

A163 MS-QBIC

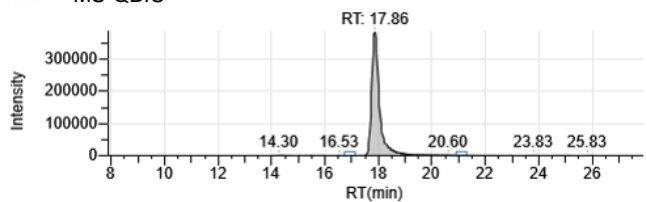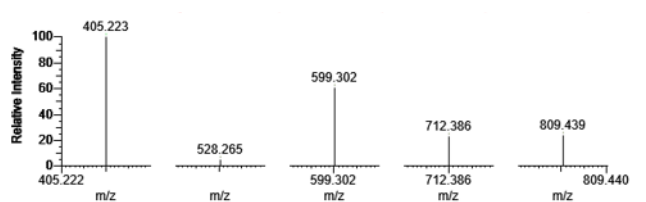

# U Apo E (LGPLVEQGR) Another organ

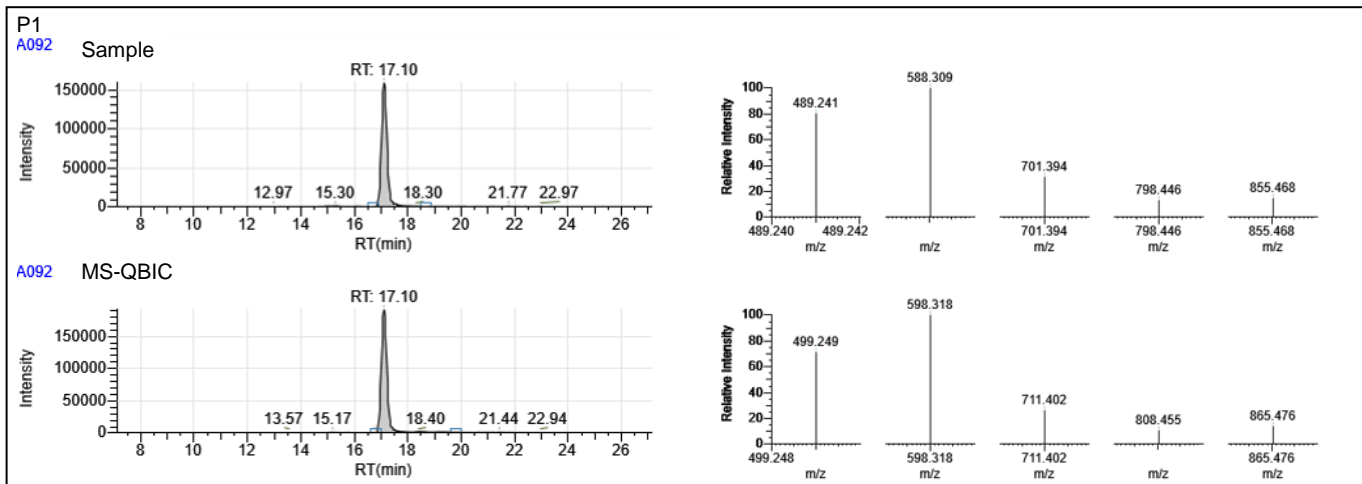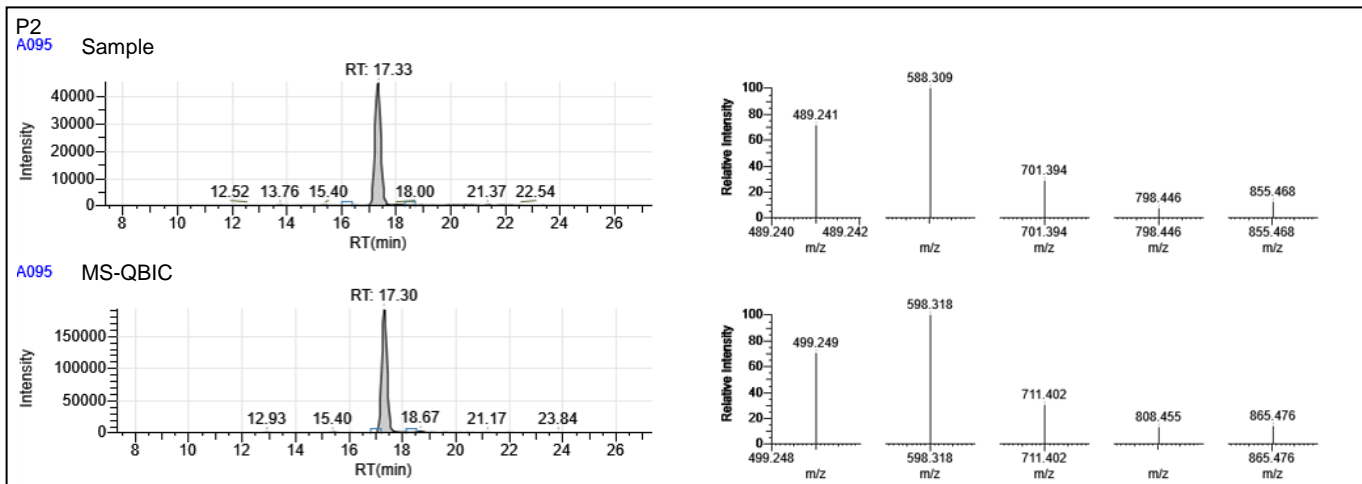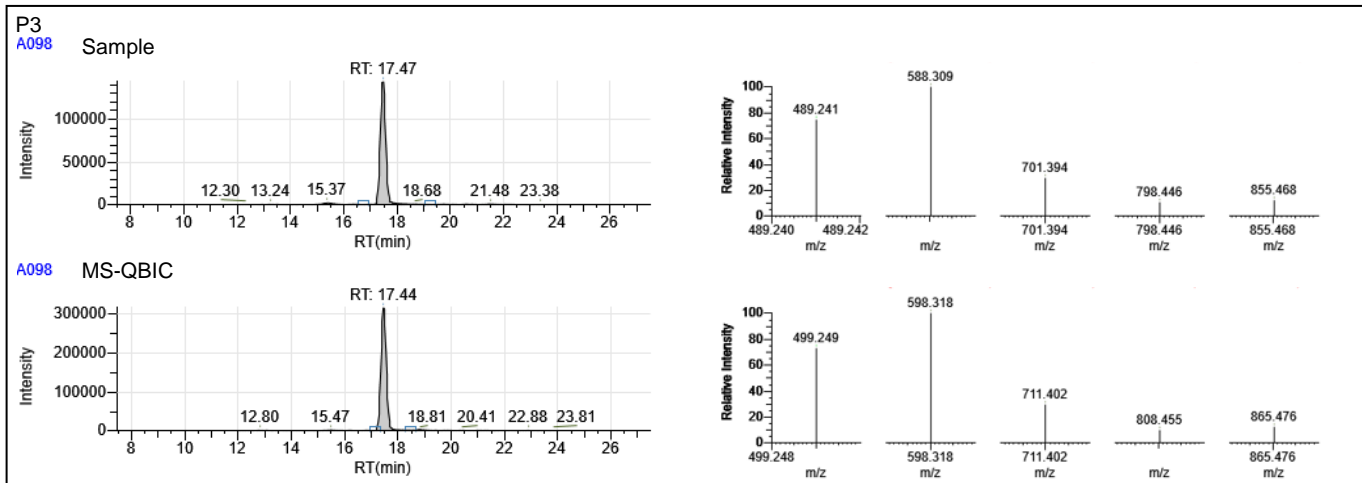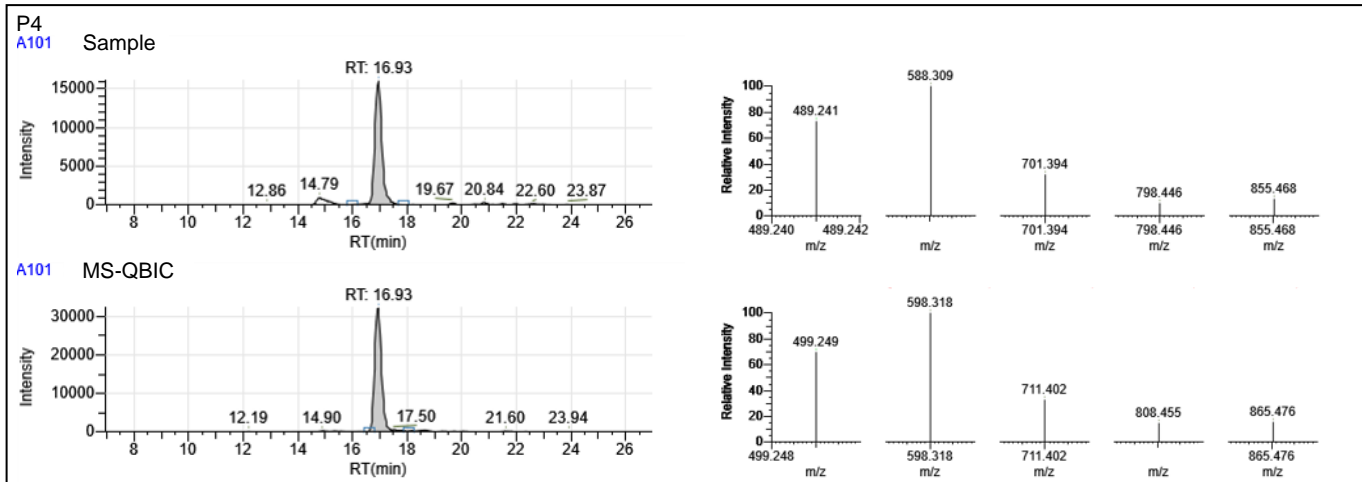



P5  
A104 Sample

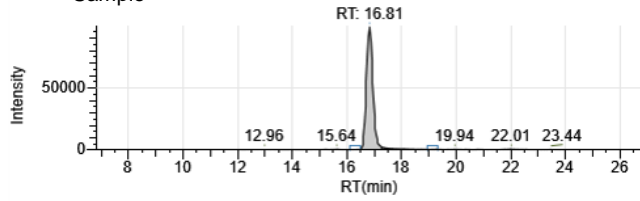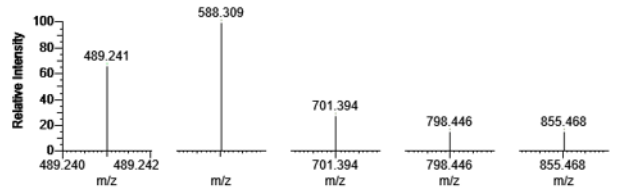

A104 MS-QBIC

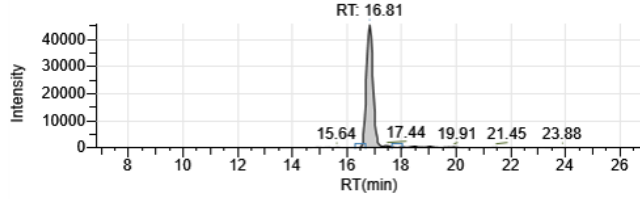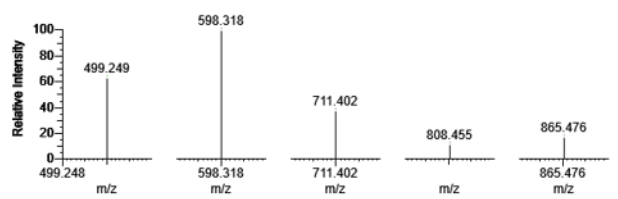

P6  
A107 Sample

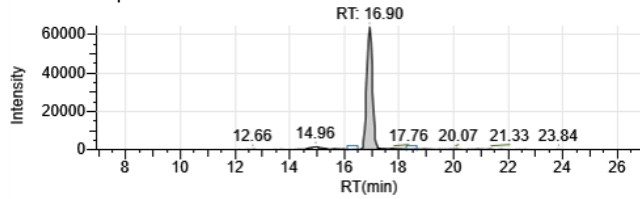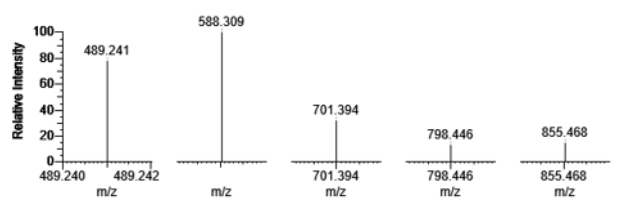

A107 MS-QBIC

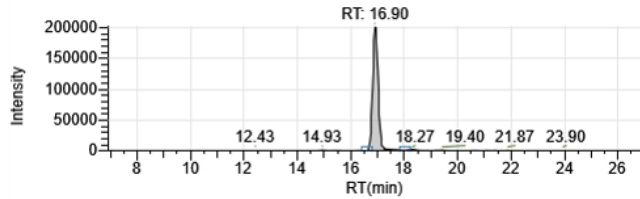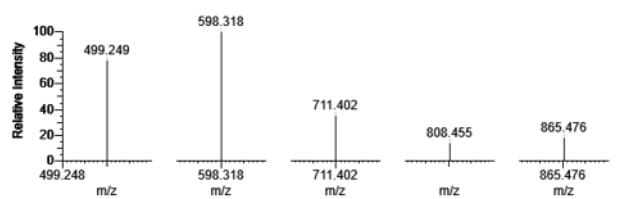

P7  
A161 Sample

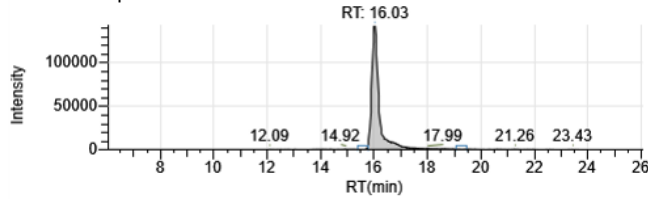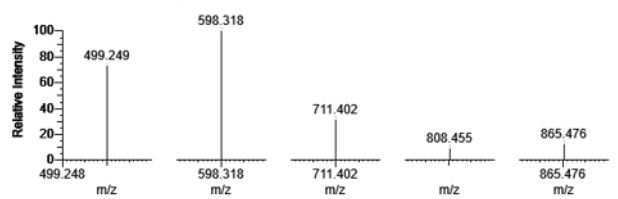

A161 MS-QBIC

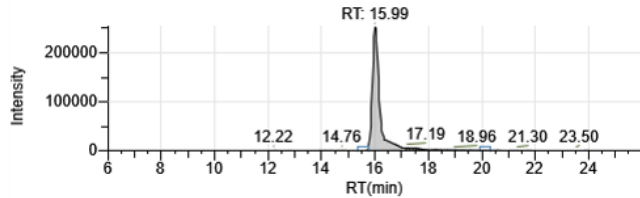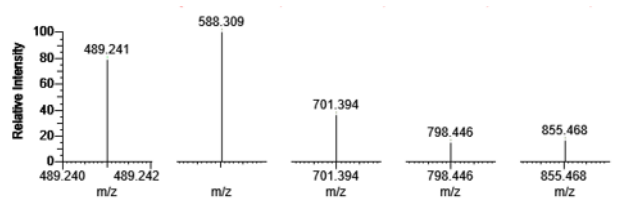

P8  
A110 Sample

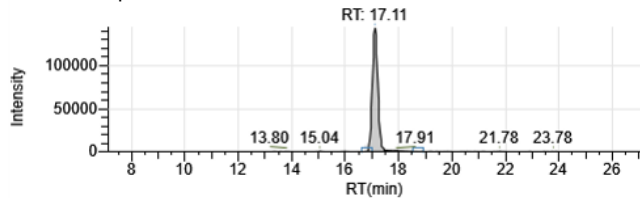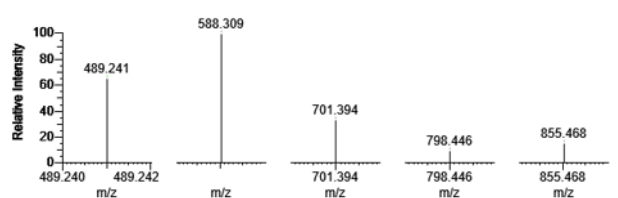

A110 MS-QBIC

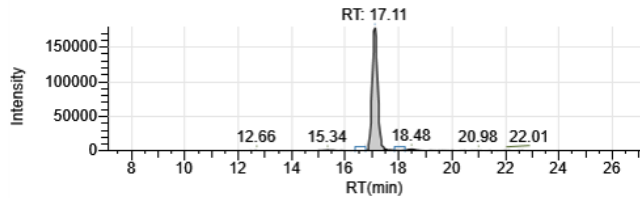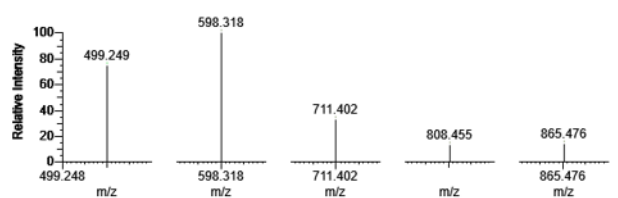



P9  
A113 Sample

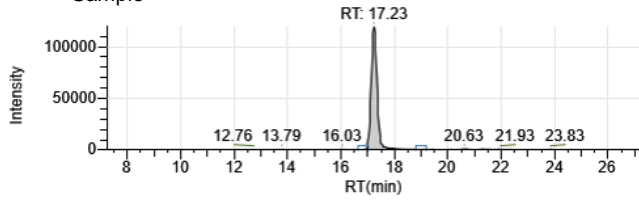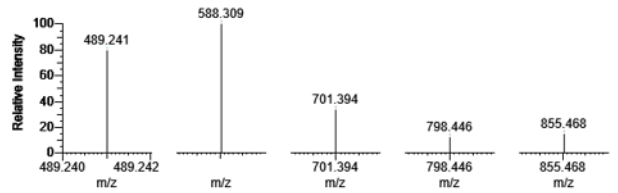

A113 MS-QBIC

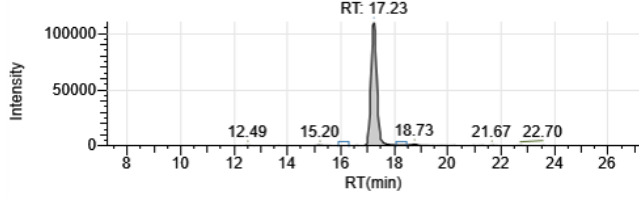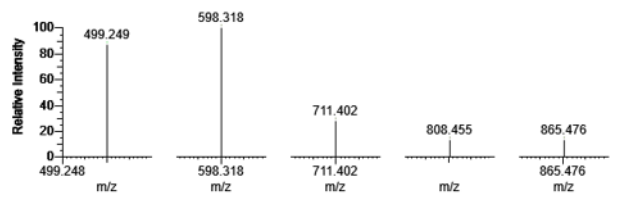

P10  
A116 Sample

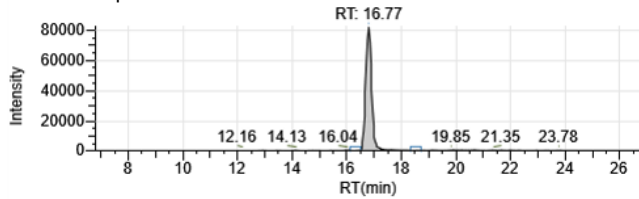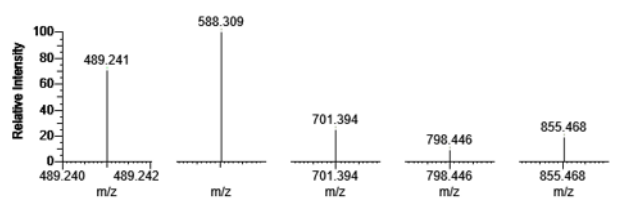

A116 MS-QBIC

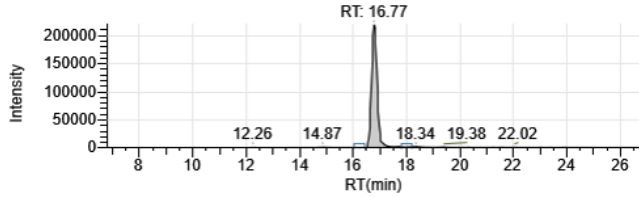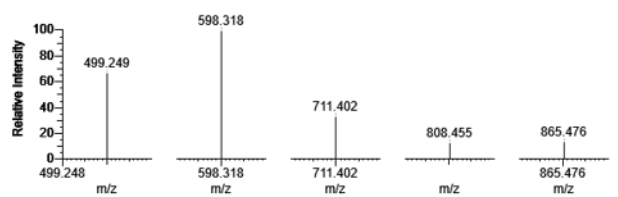

P13  
A119 Sample

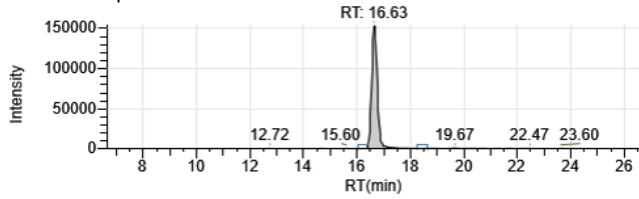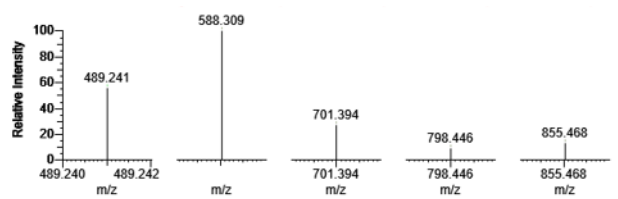

A119 MS-QBIC

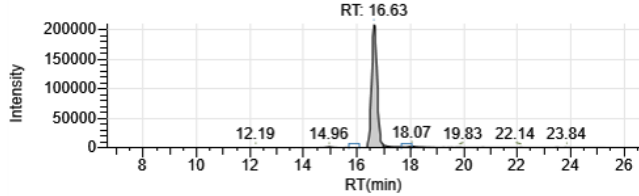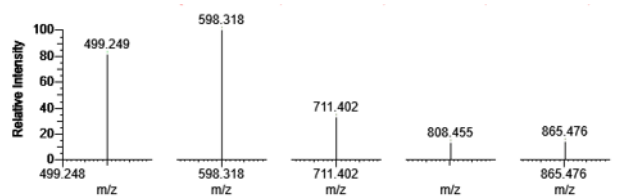

P14  
A122 Sample

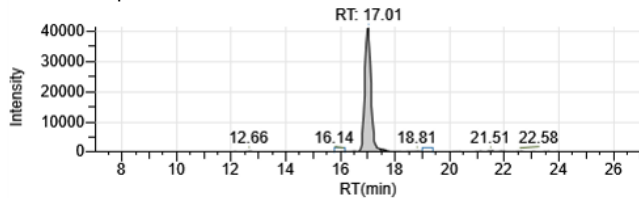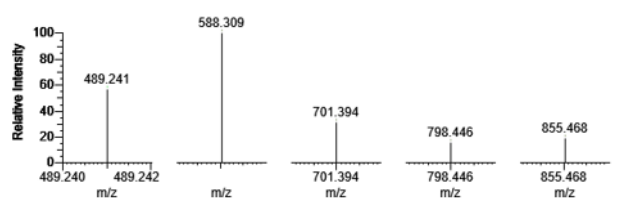

A122 MS-QBIC

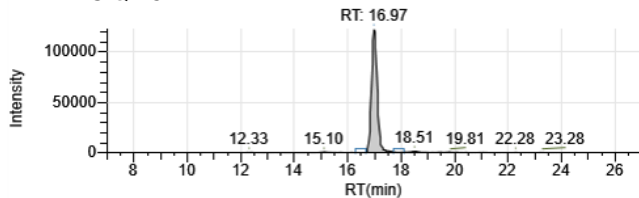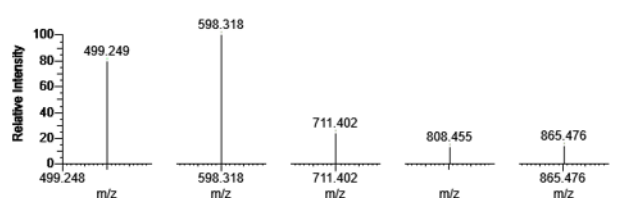

P15  
A170 Sample

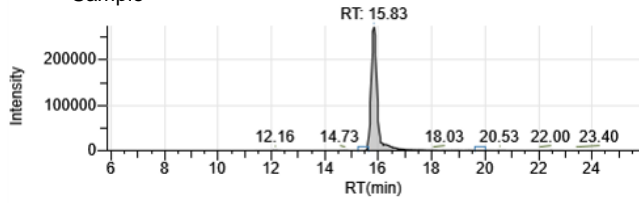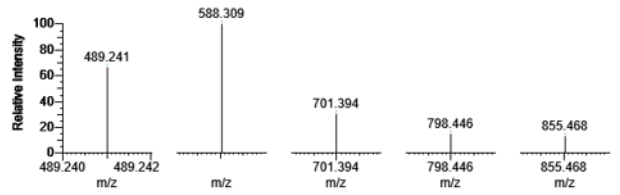

A170 MS-QBIC

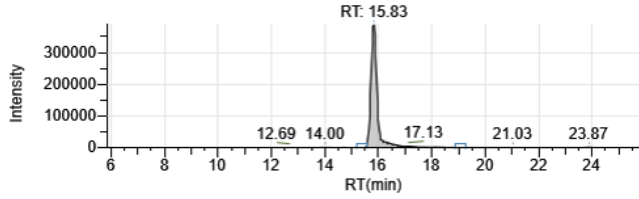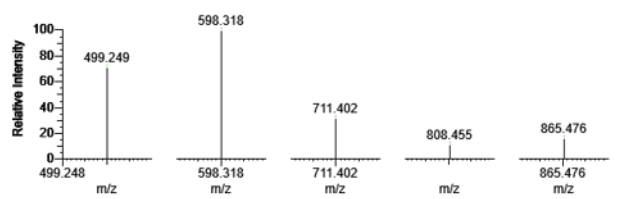

P16  
A173 Sample

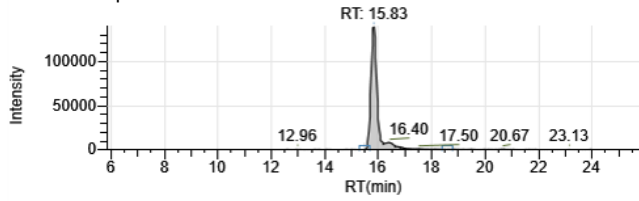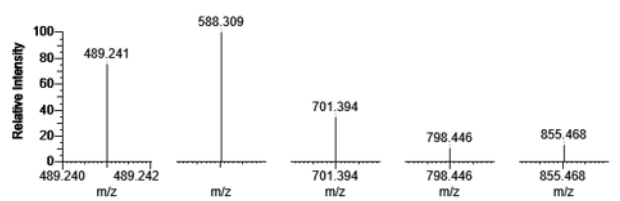

A173 MS-QBIC

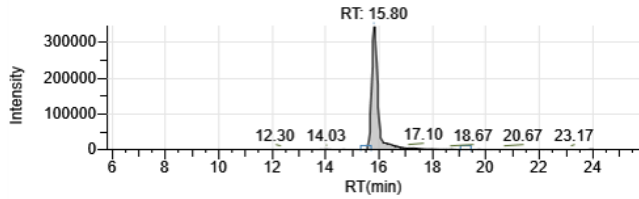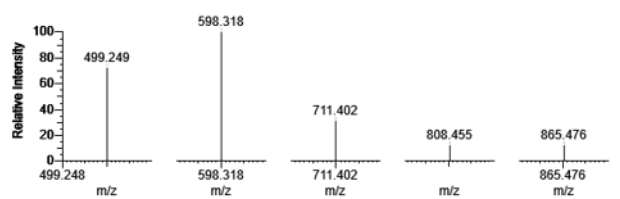

P17  
A131 Sample

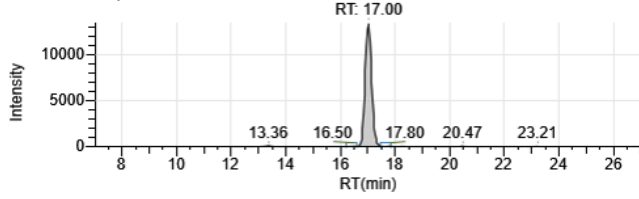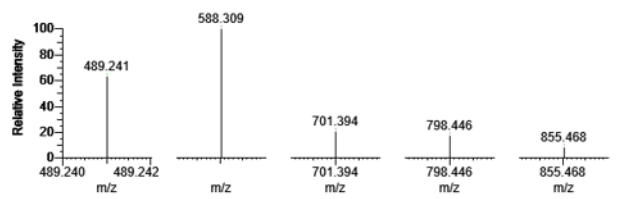

A131 MS-QBIC

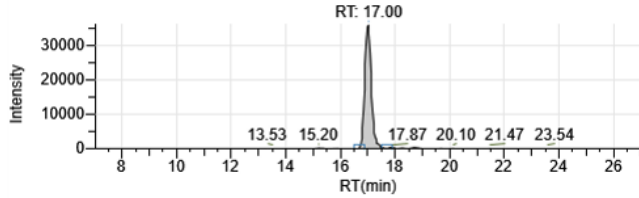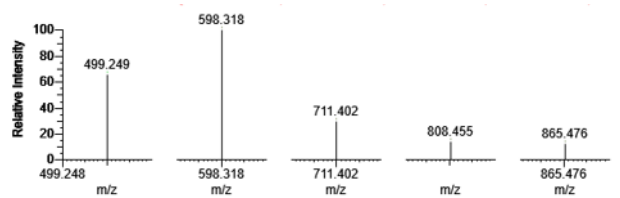

P18  
A134 Sample

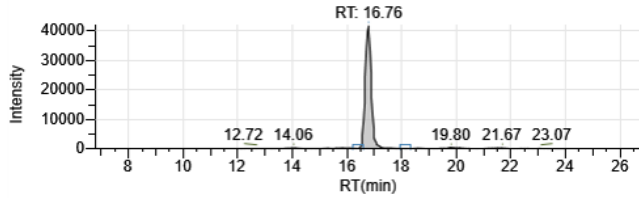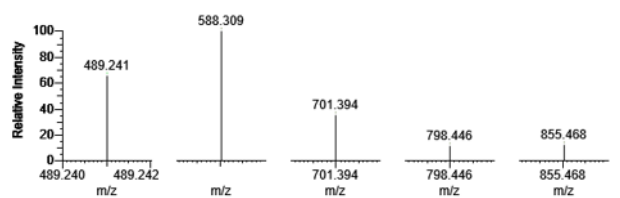

A134 MS-QBIC

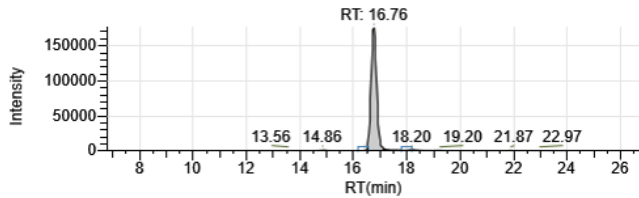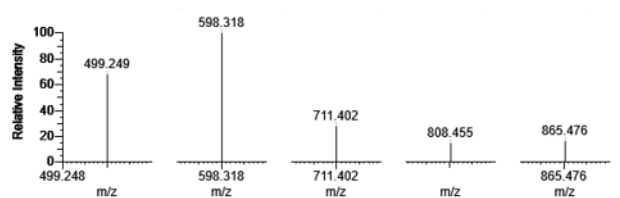

P19  
A137 Sample

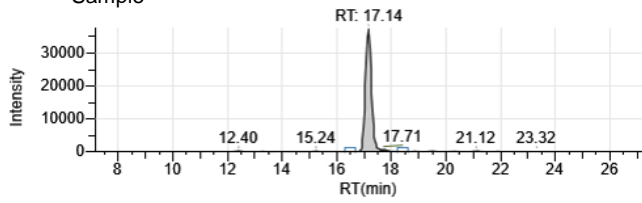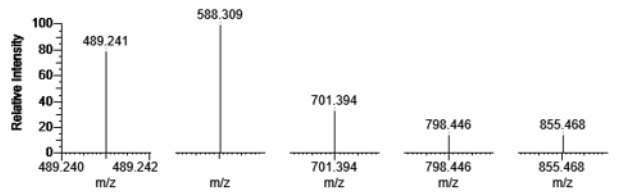

A137 MS-QBIC

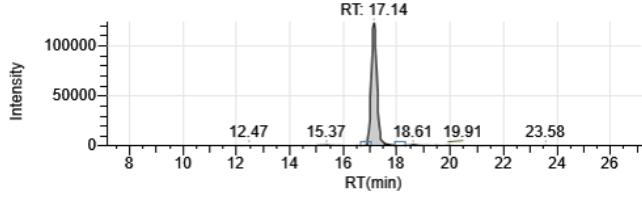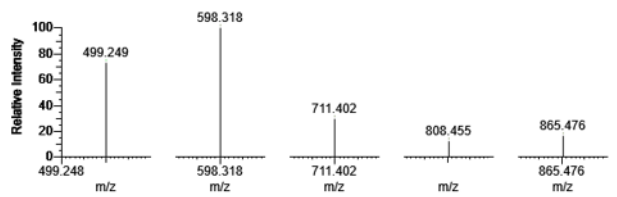

P20  
A146 Sample

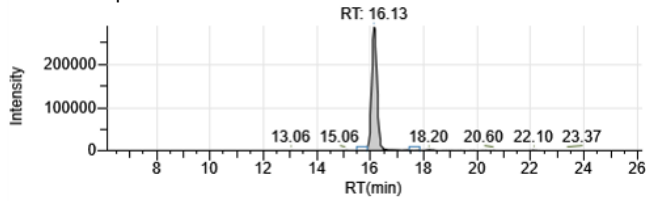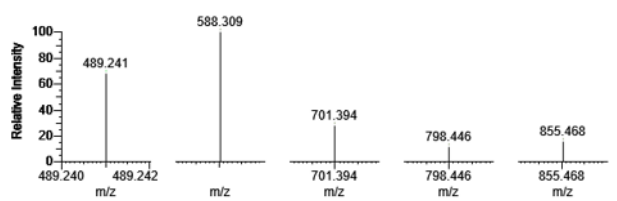

A146 MS-QBIC

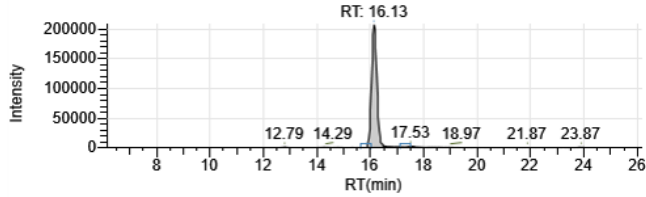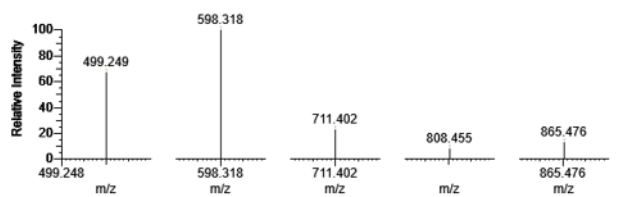

P21  
A149 Sample

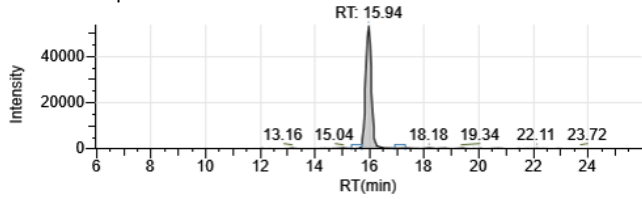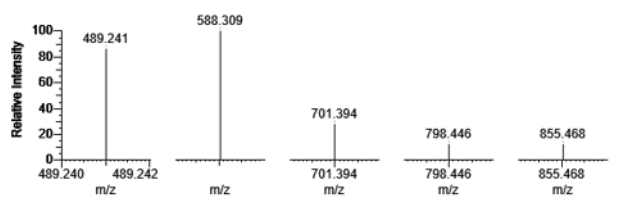

A149 MS-QBIC

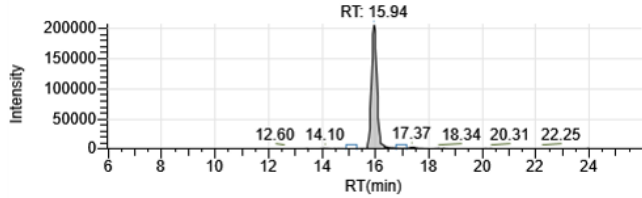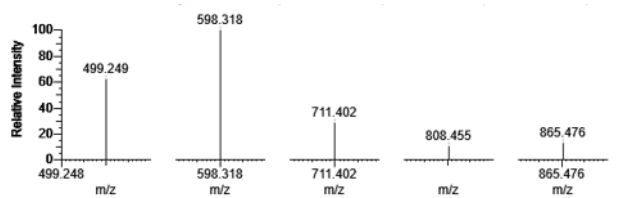

P22  
A125 Sample

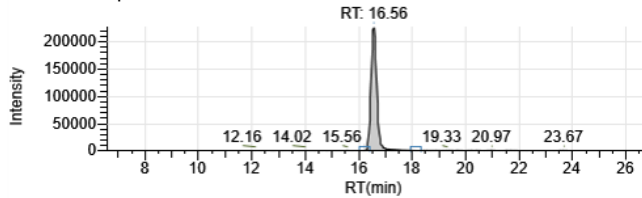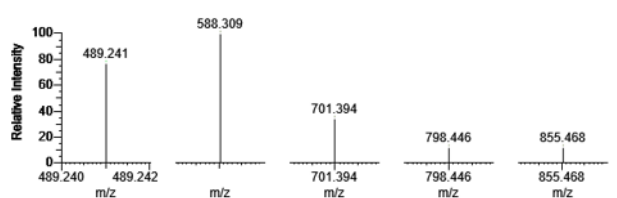

A125 MS-QBIC

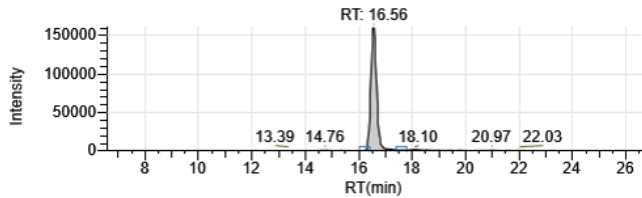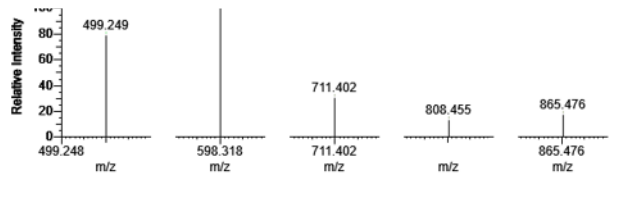

P23  
A167 Sample

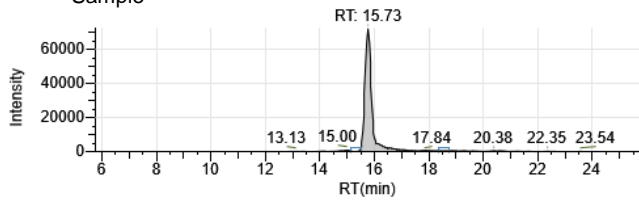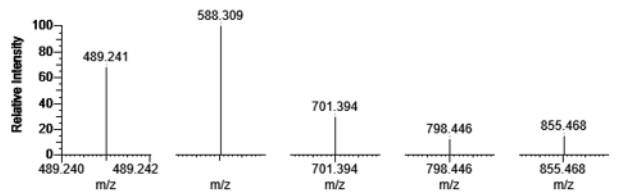

A167 MS-QBIC

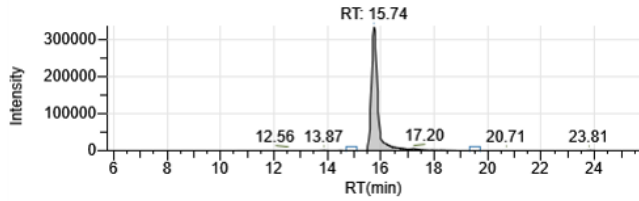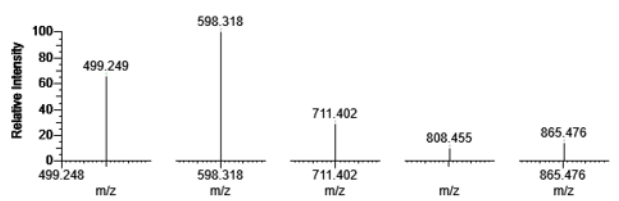

P24  
A155 Sample

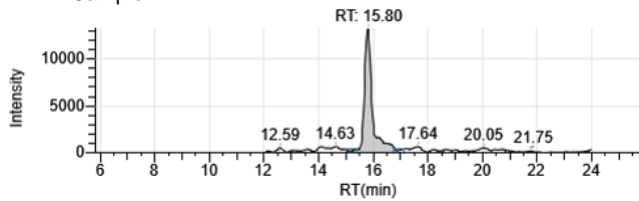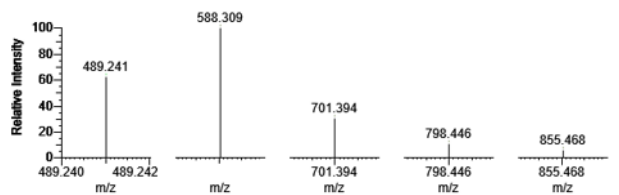

A155 MS-QBIC

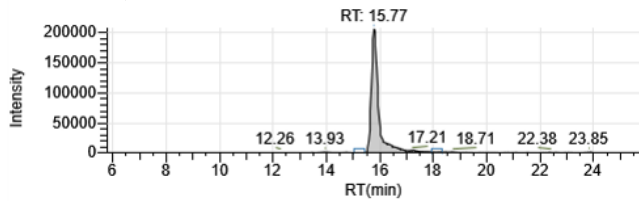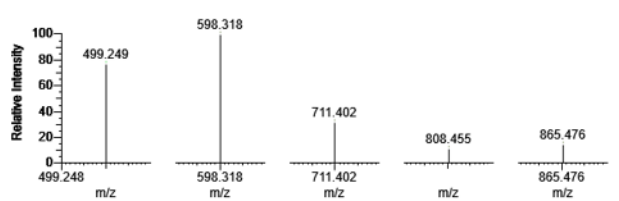

P26  
A128 Sample

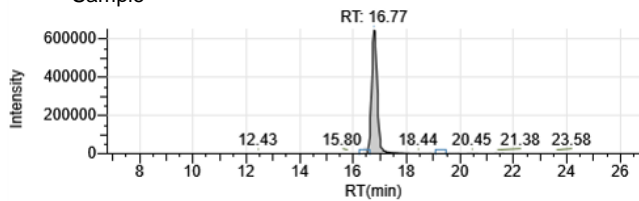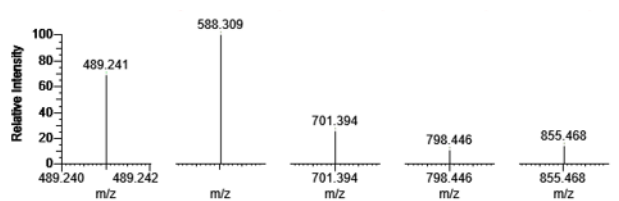

A128 MS-QBIC

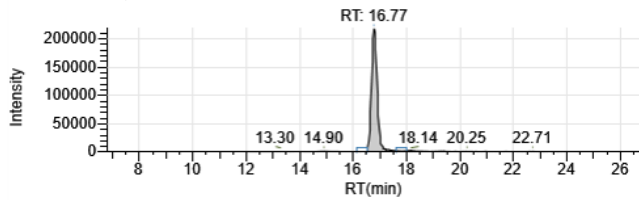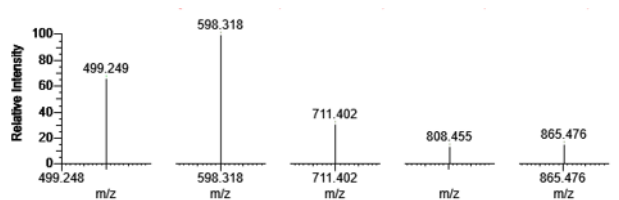

P27  
A143 Sample

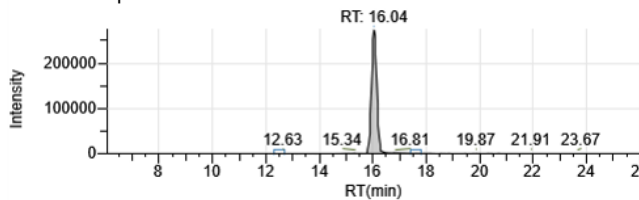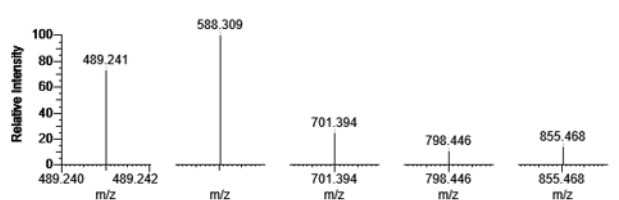

A143 MS-QBIC

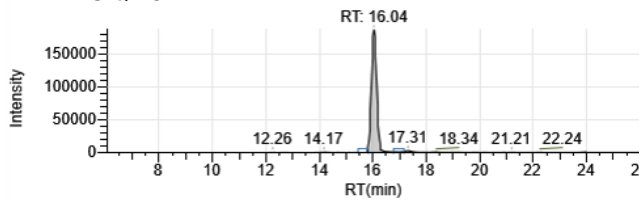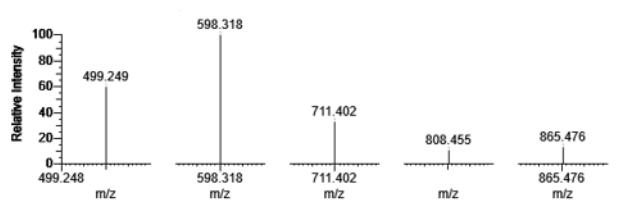

P28  
A152

Sample

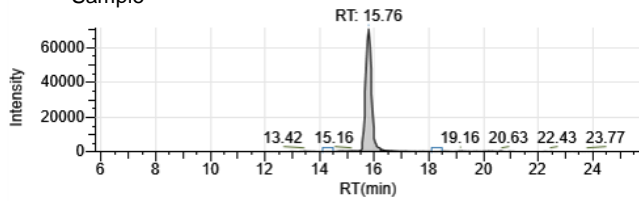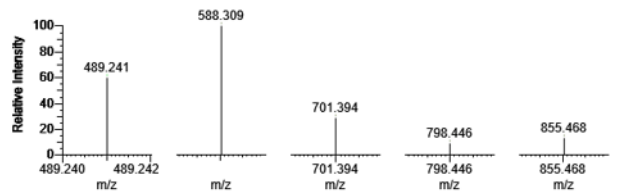

MS-QBIC

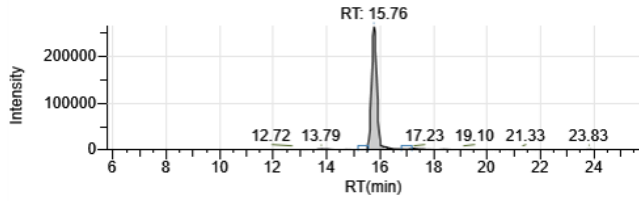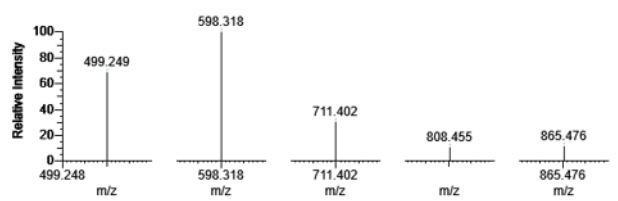

P29

A140

Sample

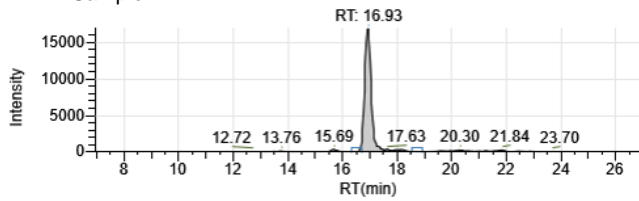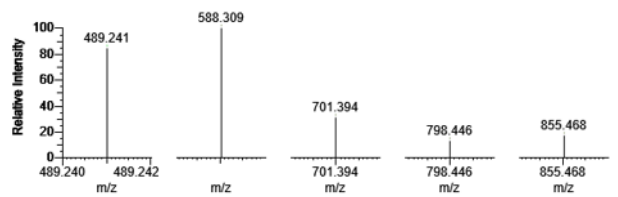

MS-QBIC

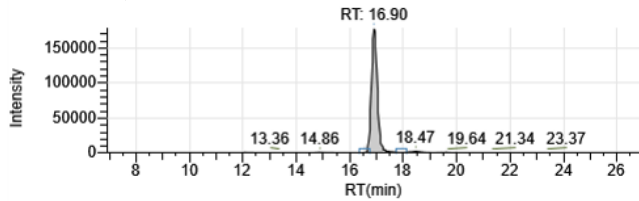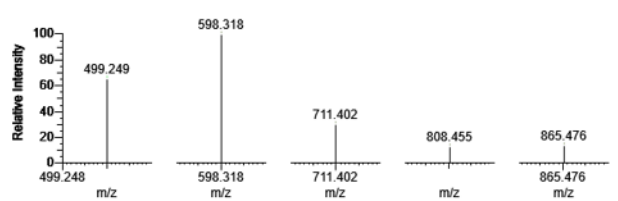

P30

A164

Sample

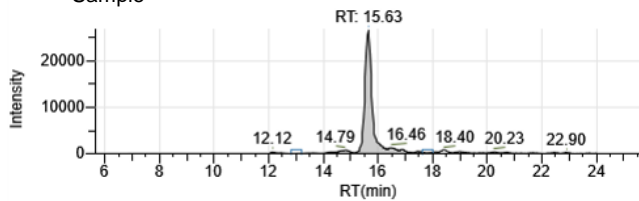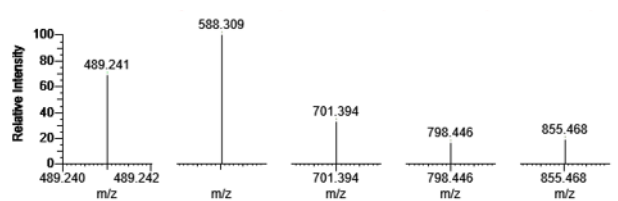

MS-QBIC

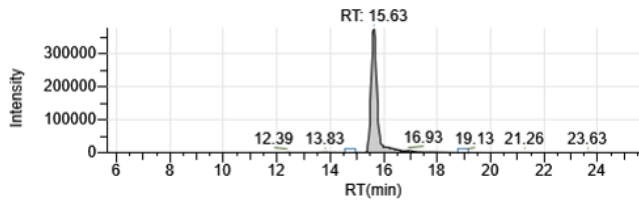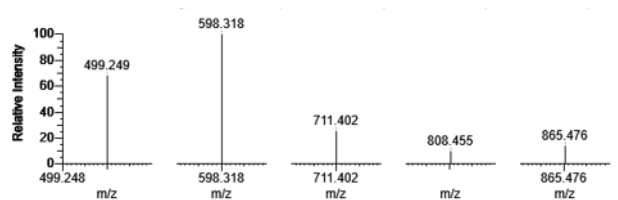

# V Gelsolin (EPGLQIWR) Another organ

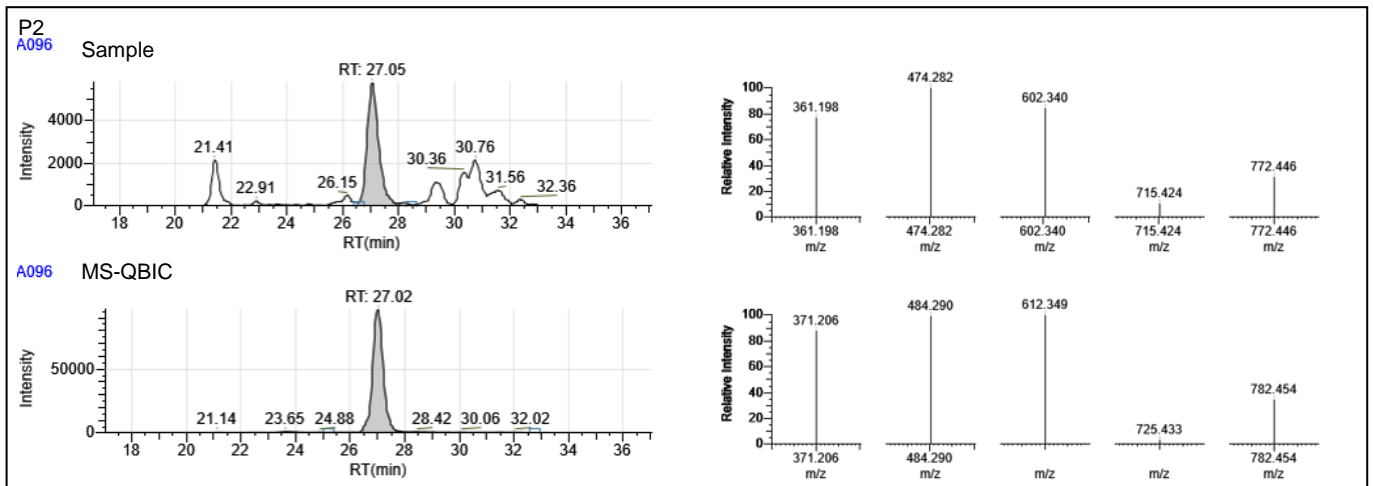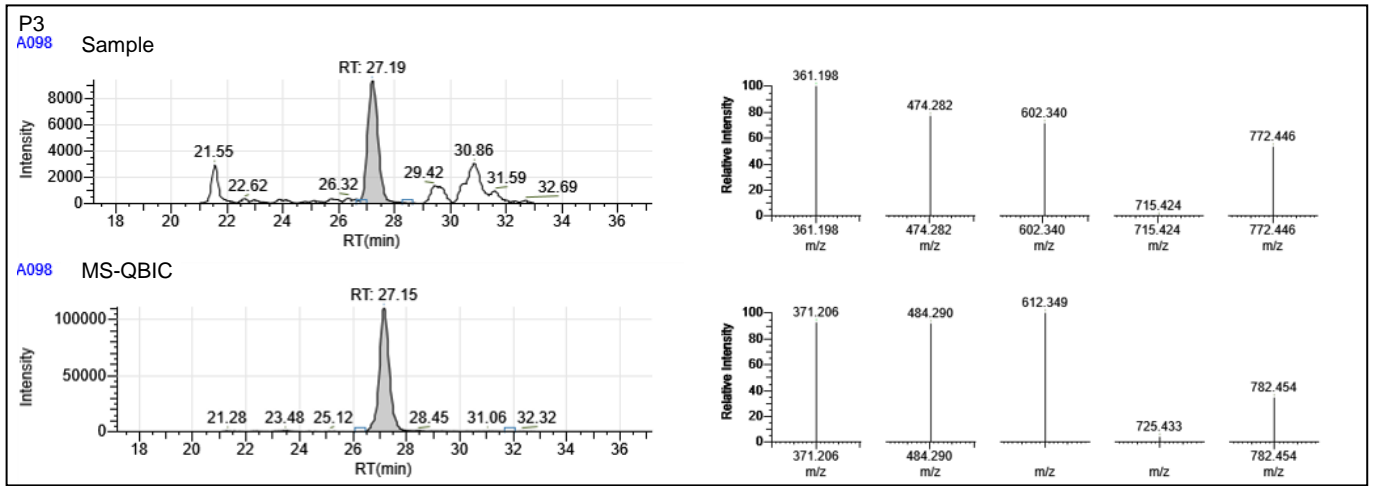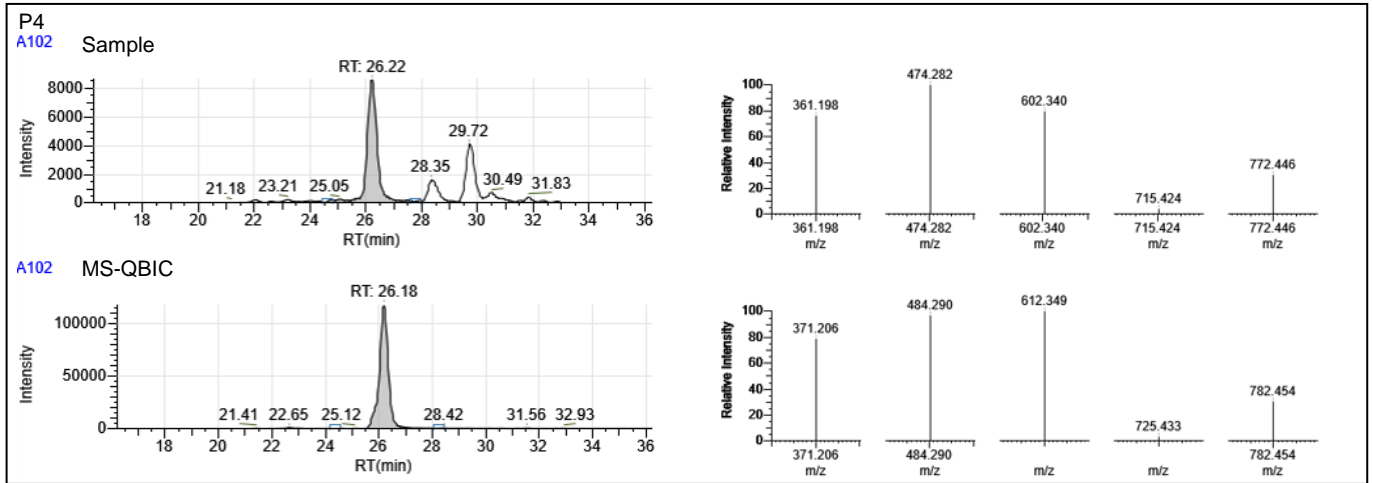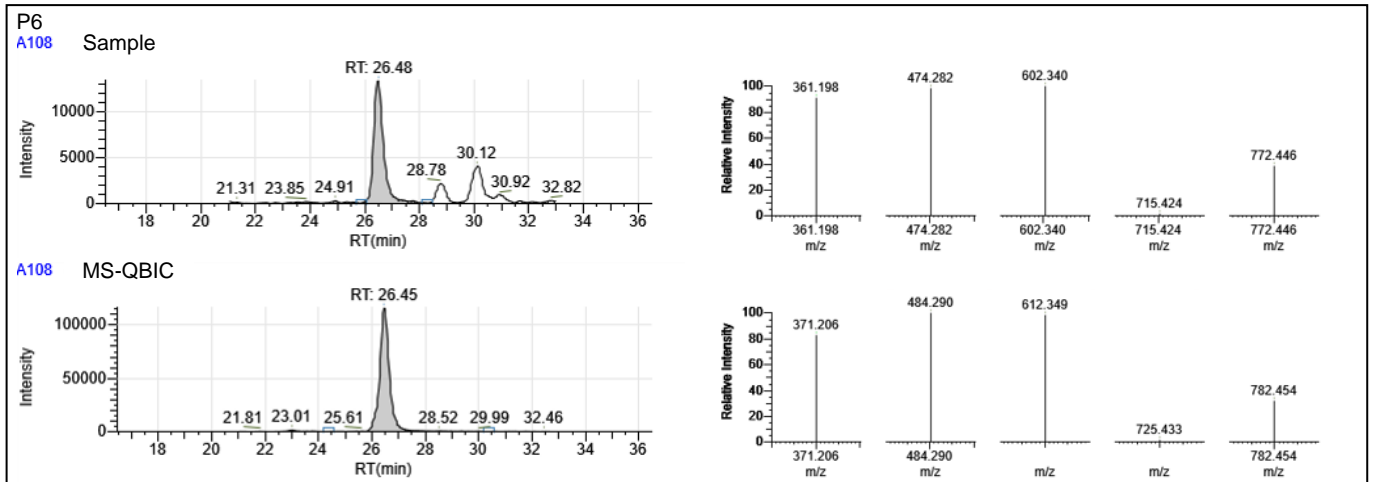

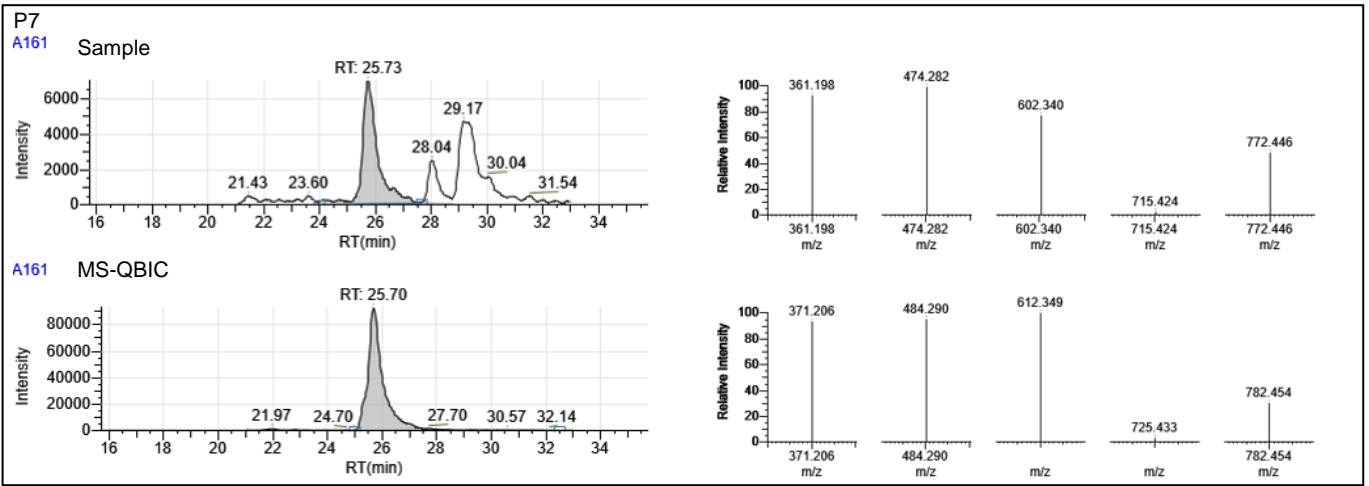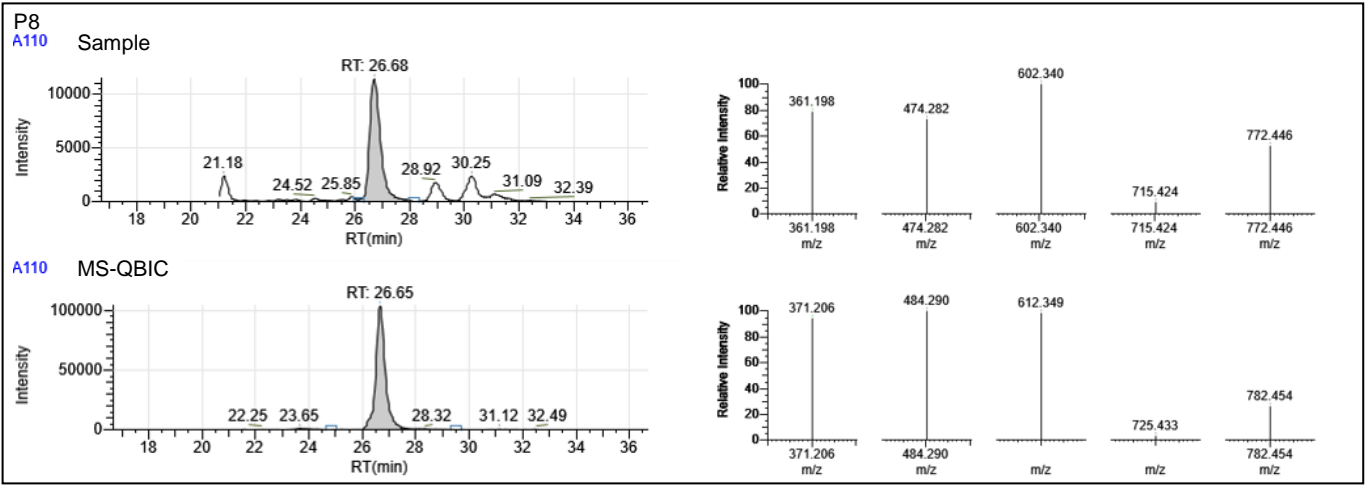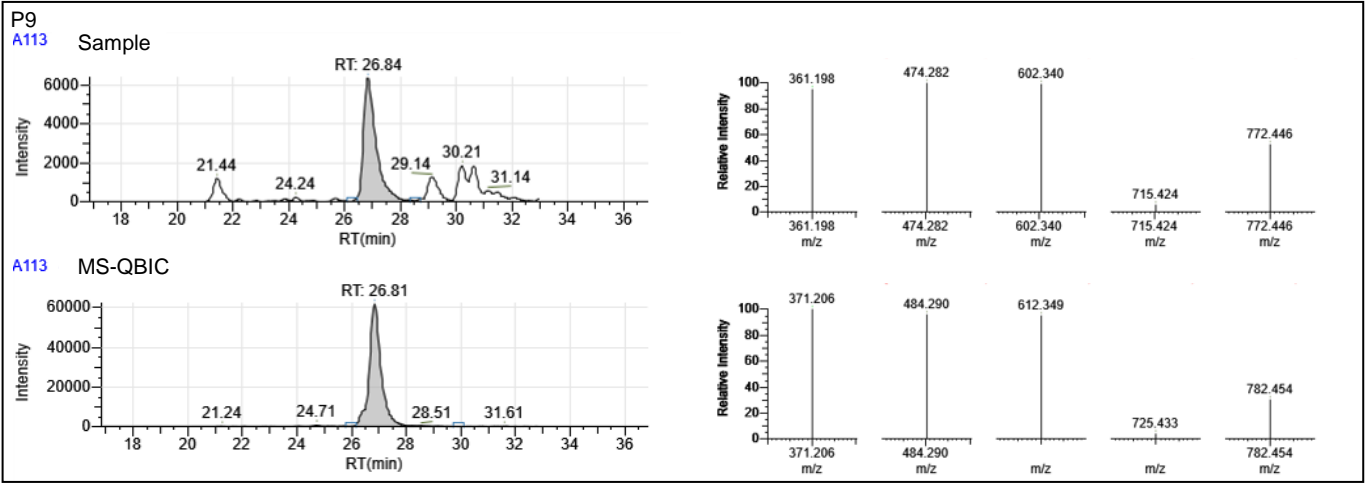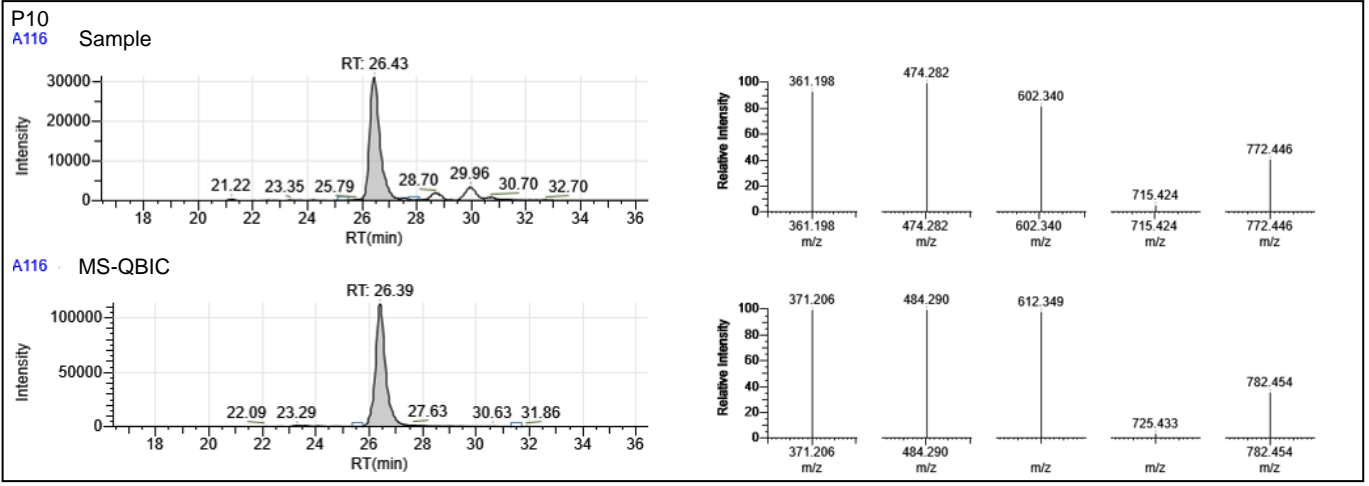



P13  
A120 Sample

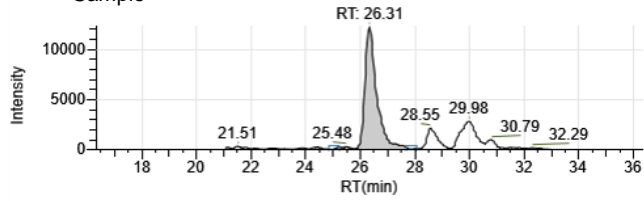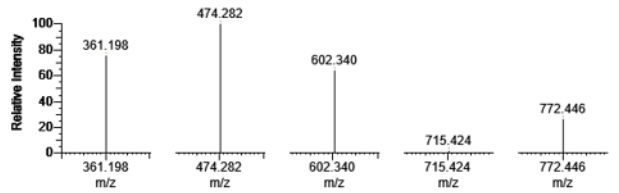

A120 MS-QBIC

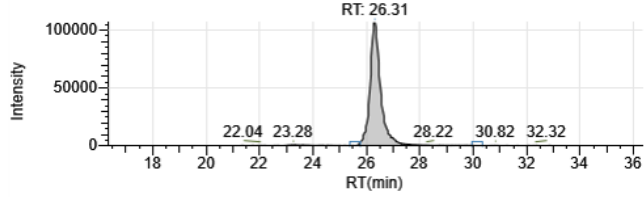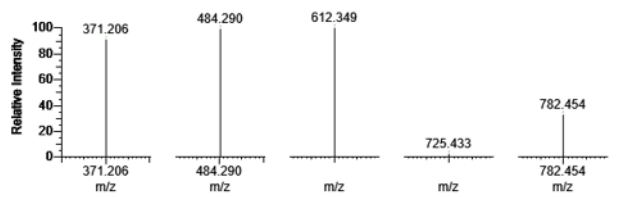

P14  
A123 Sample

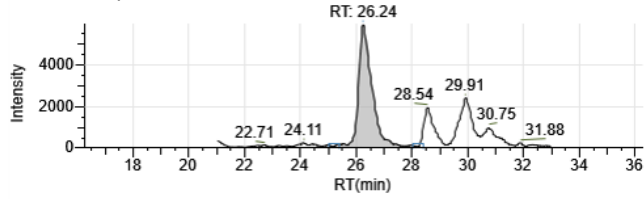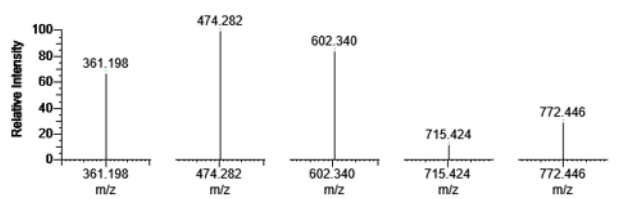

A123 MS-QBIC

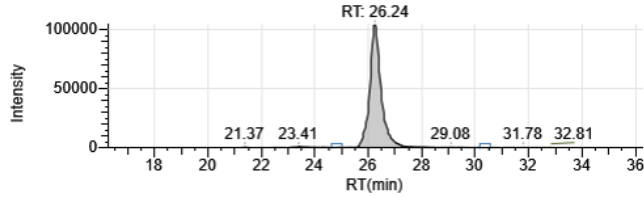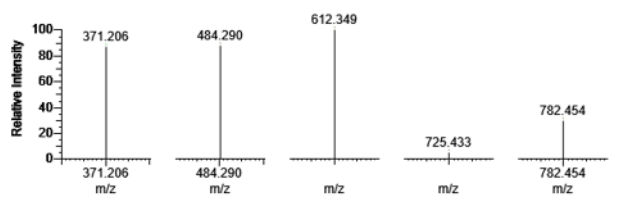

P15  
A170 Sample

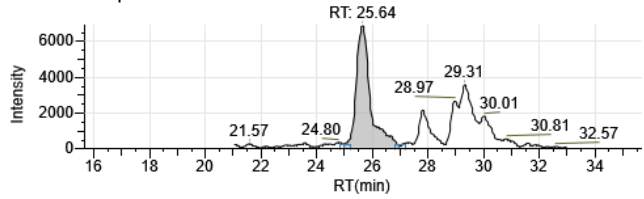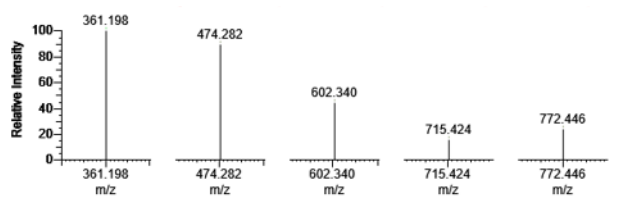

A170 MS-QBIC

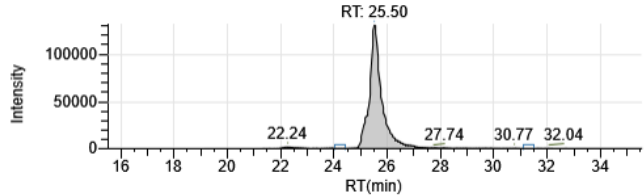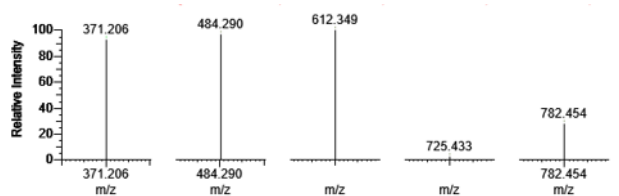

P16  
A173 Sample

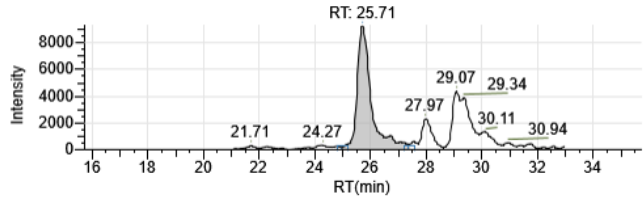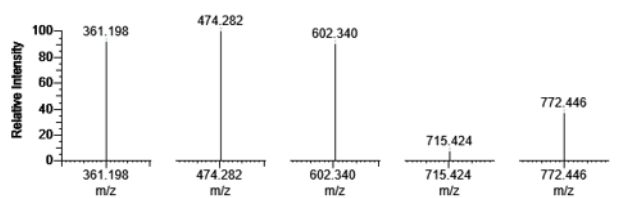

A173 MS-QBIC

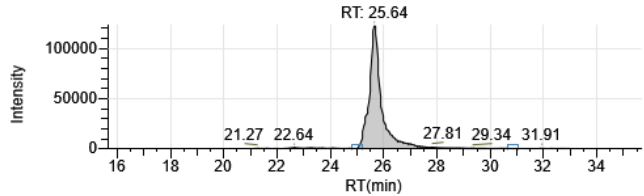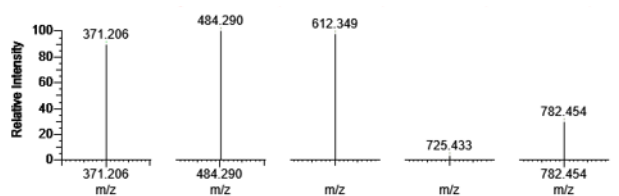



P17  
A130 Sample

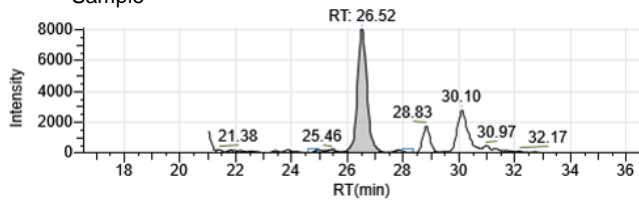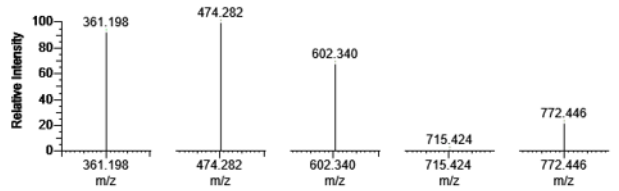

A130 MS-QBIC

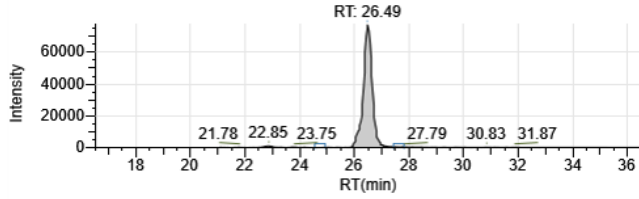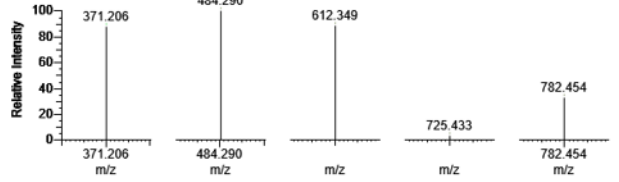

P18  
A134 Sample

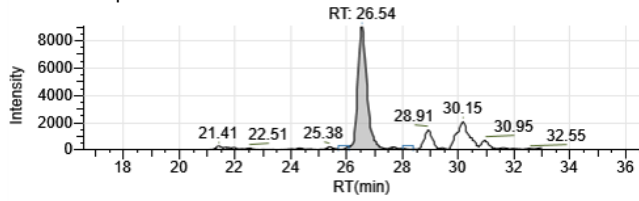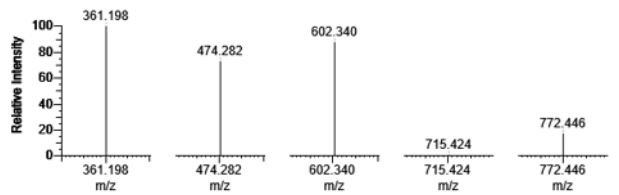

A134 MS-QBIC

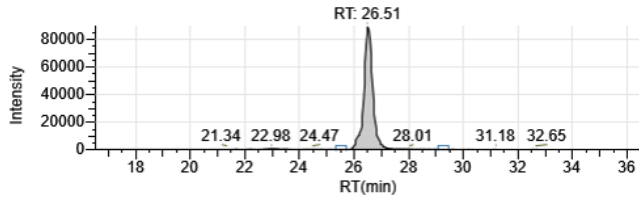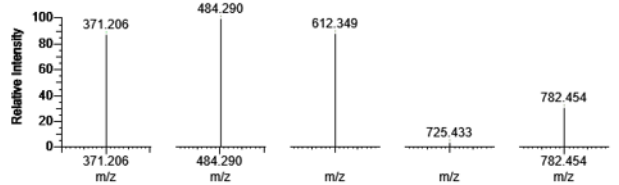

P19  
A136 Sample

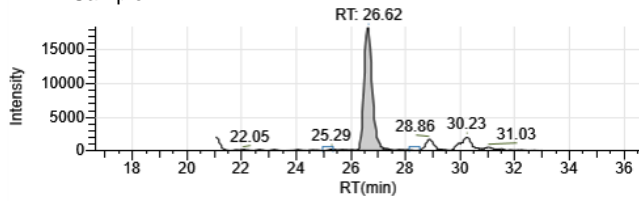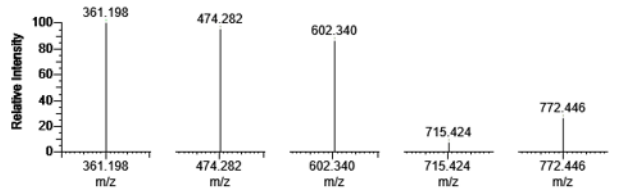

A136 MS-QBIC

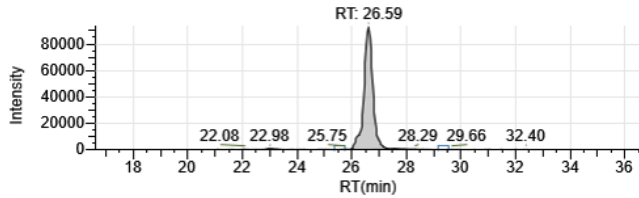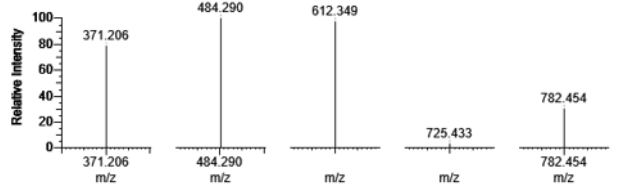

P20  
A145 Sample

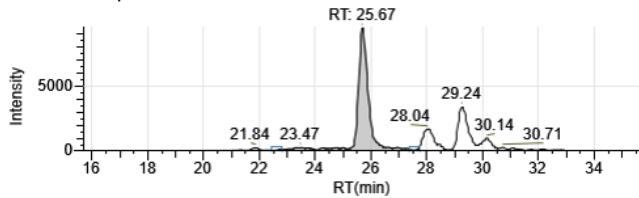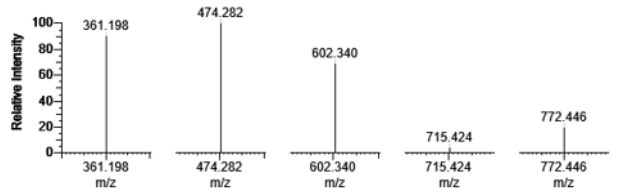

A145 MS-QBIC

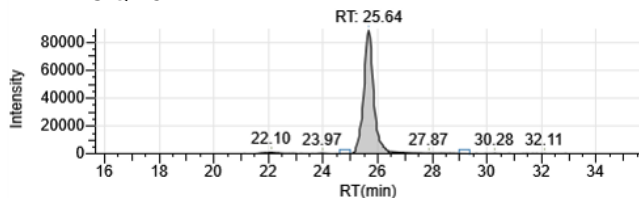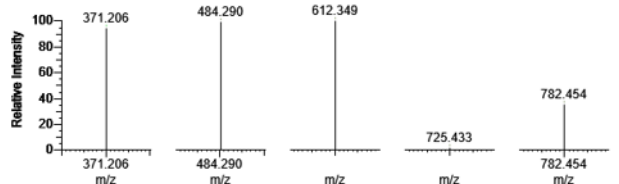

P21  
A149

Sample

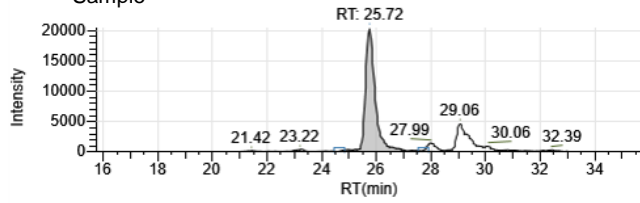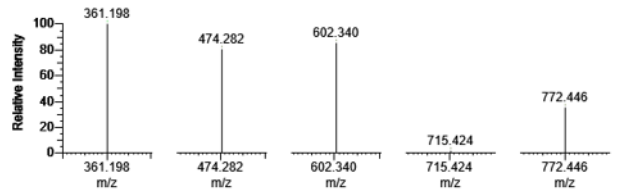

A149 MS-QBIC

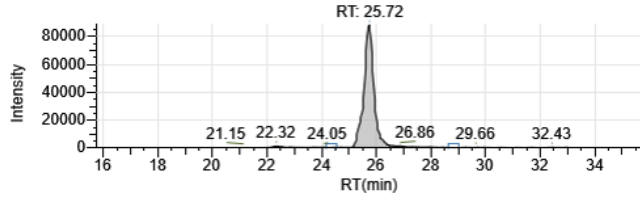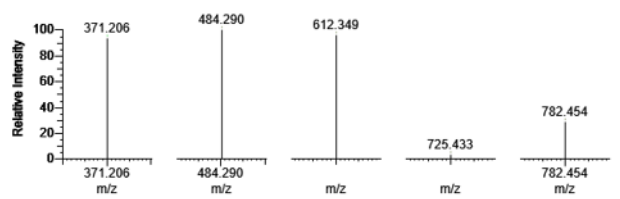

P22  
A125

Sample

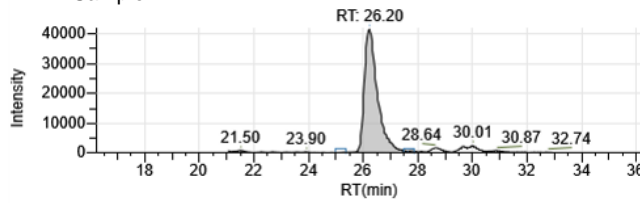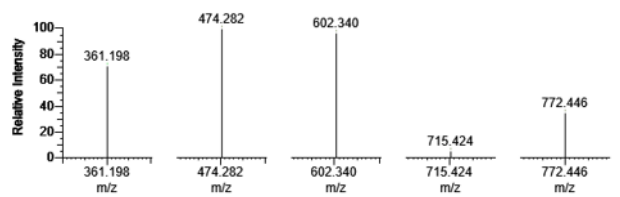

A125 MS-QBIC

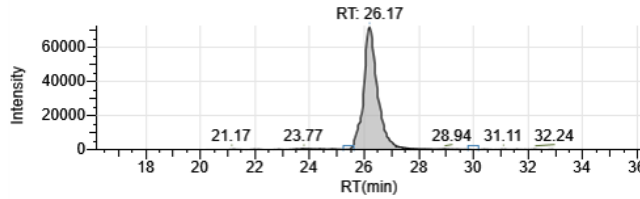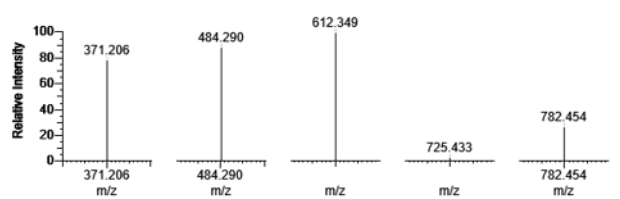

P23  
A168

Sample

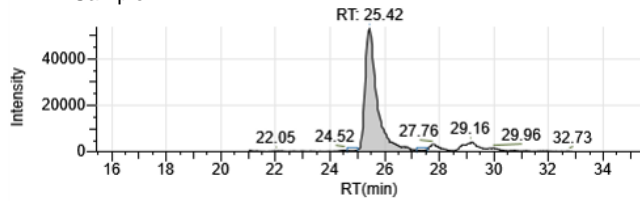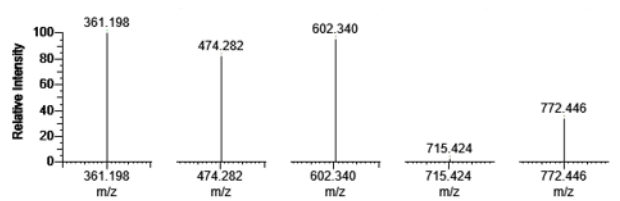

A168 MS-QBIC

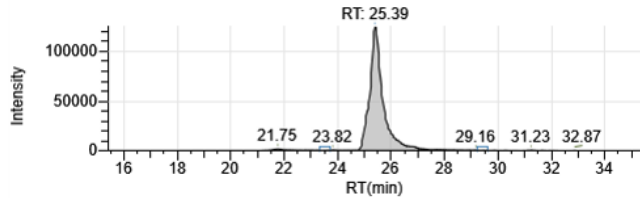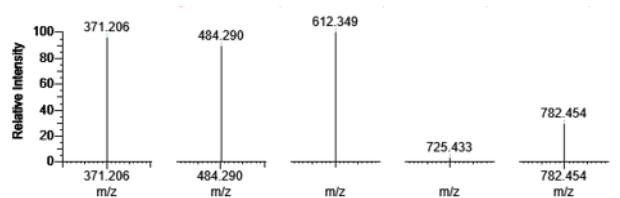

P24  
A155

Sample

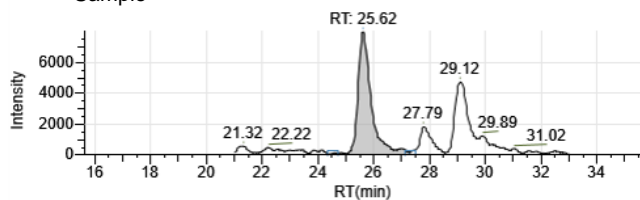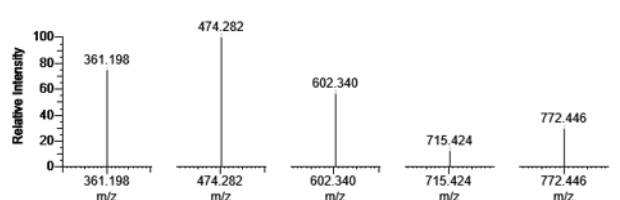

A155 MS-QBIC

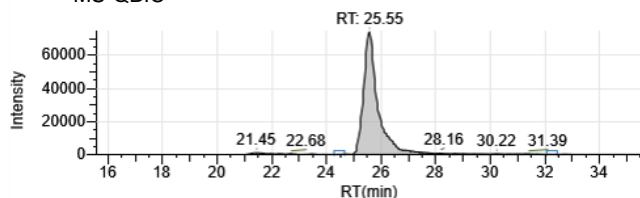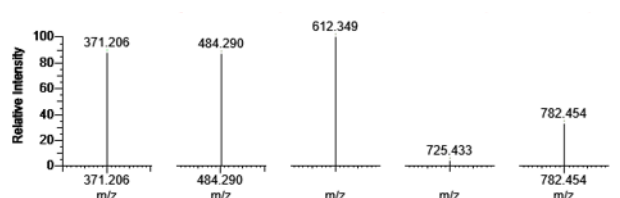

P25  
A158

Sample

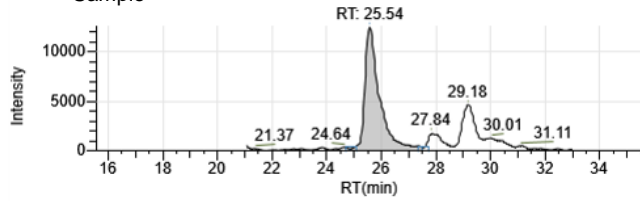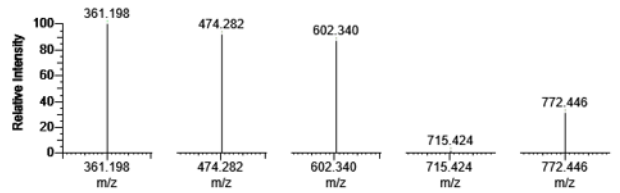

A158 MS-QBIC

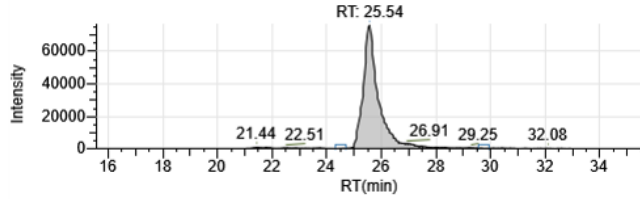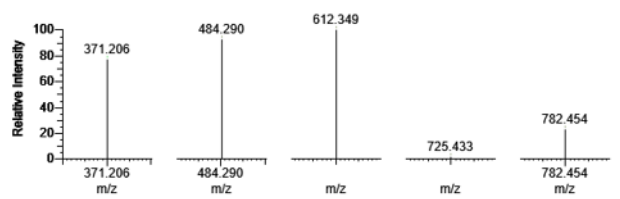

P27

A142

Sample

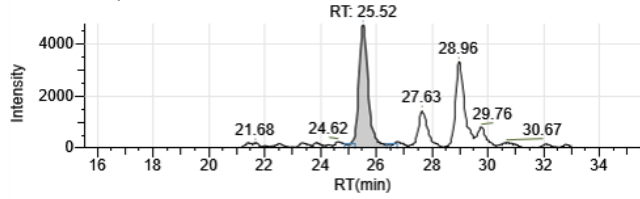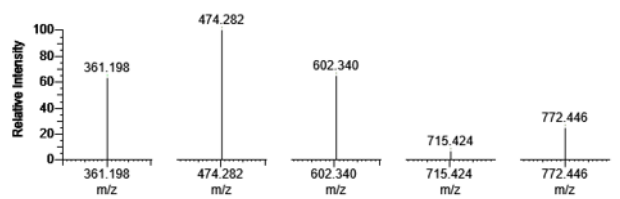

A142 MS-QBIC

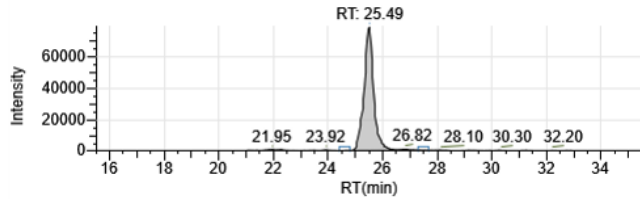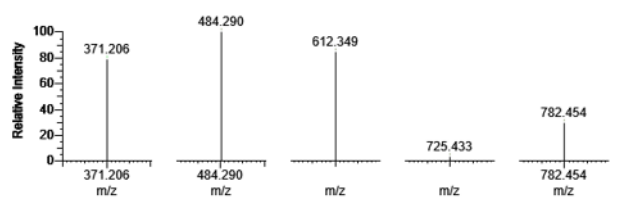

P28

A152

Sample

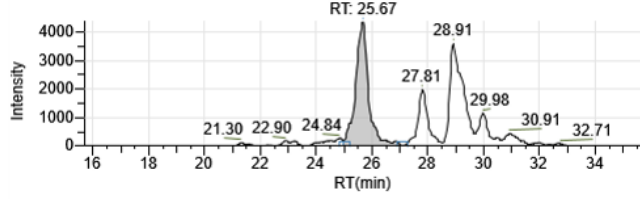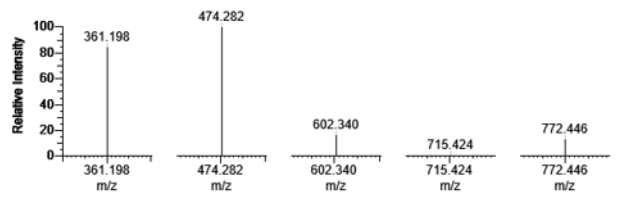

A152 MS-QBIC

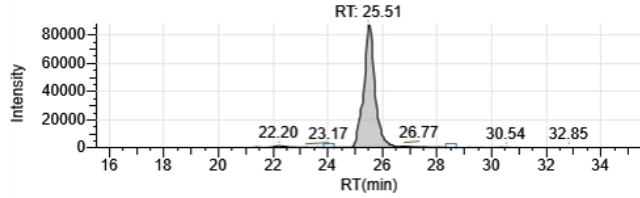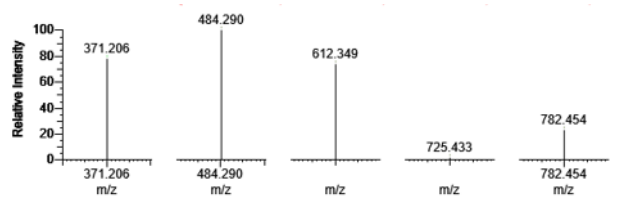

P29

A139

Sample

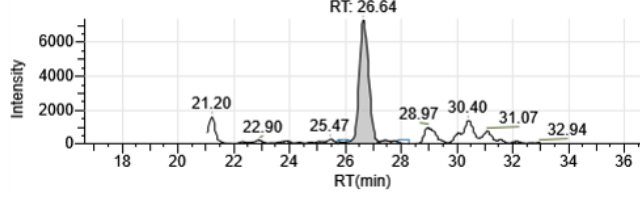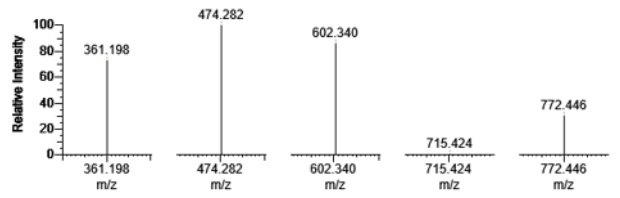

A139 MS-QBIC

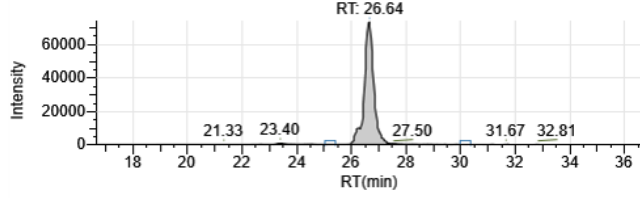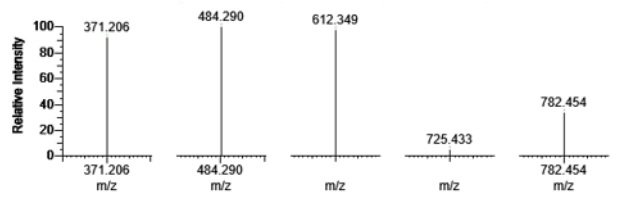

P30  
A165

Sample

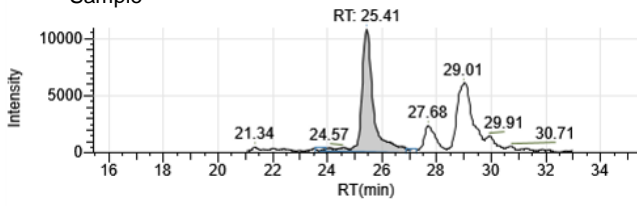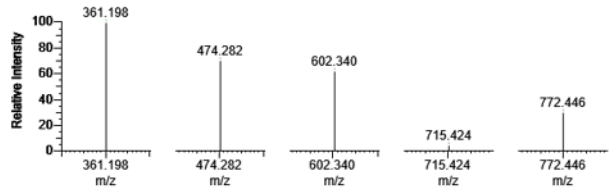

A165 MS-QBIC

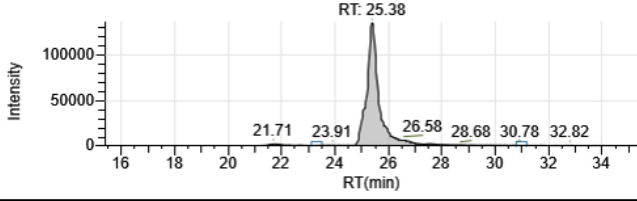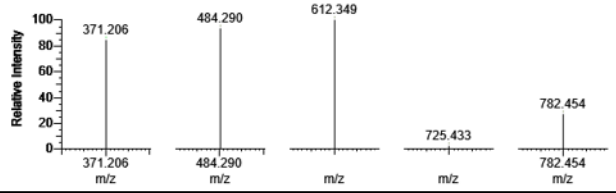

# W FGA (GGTSYGTGSETESPR) Another organ

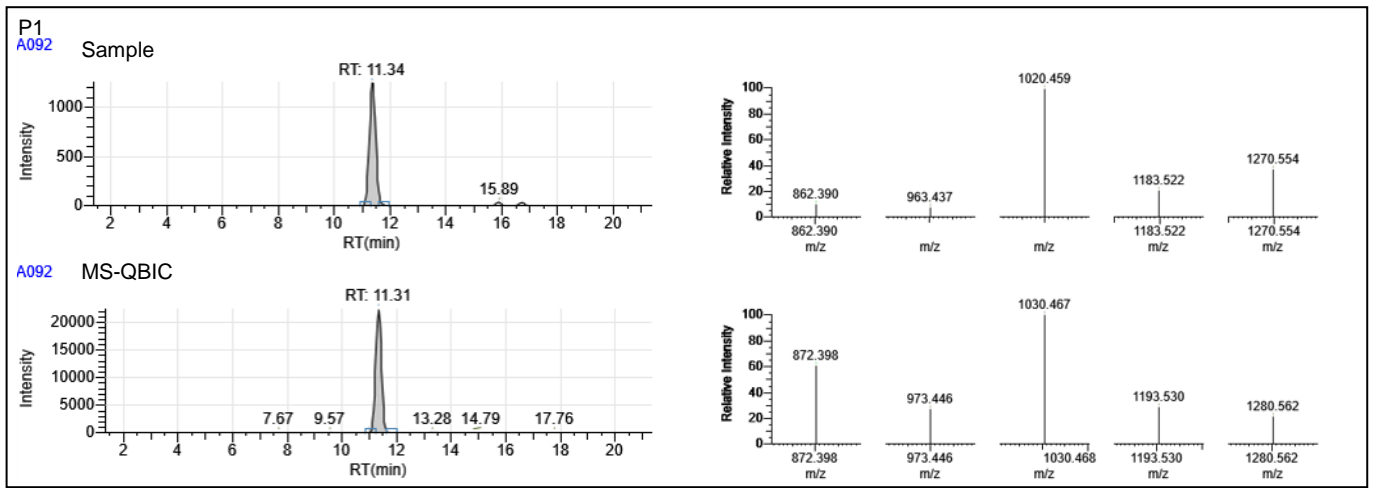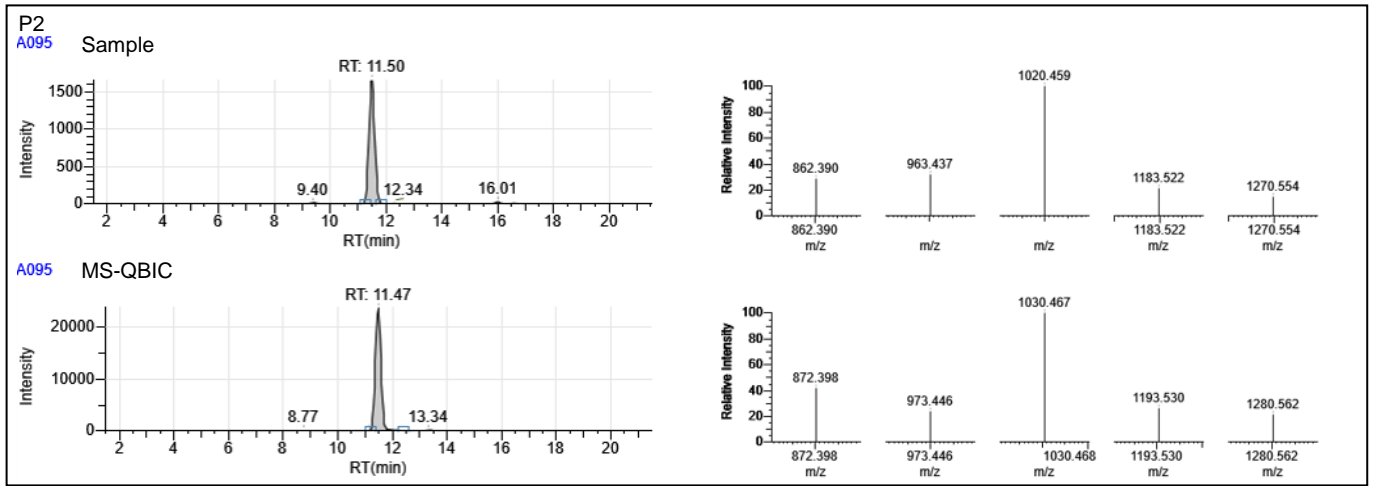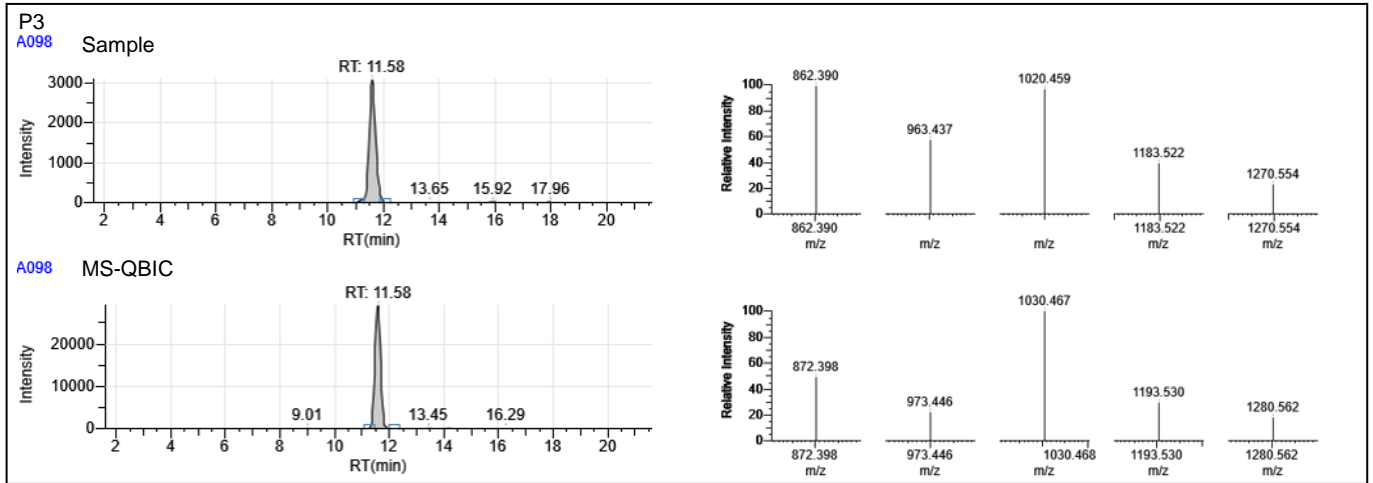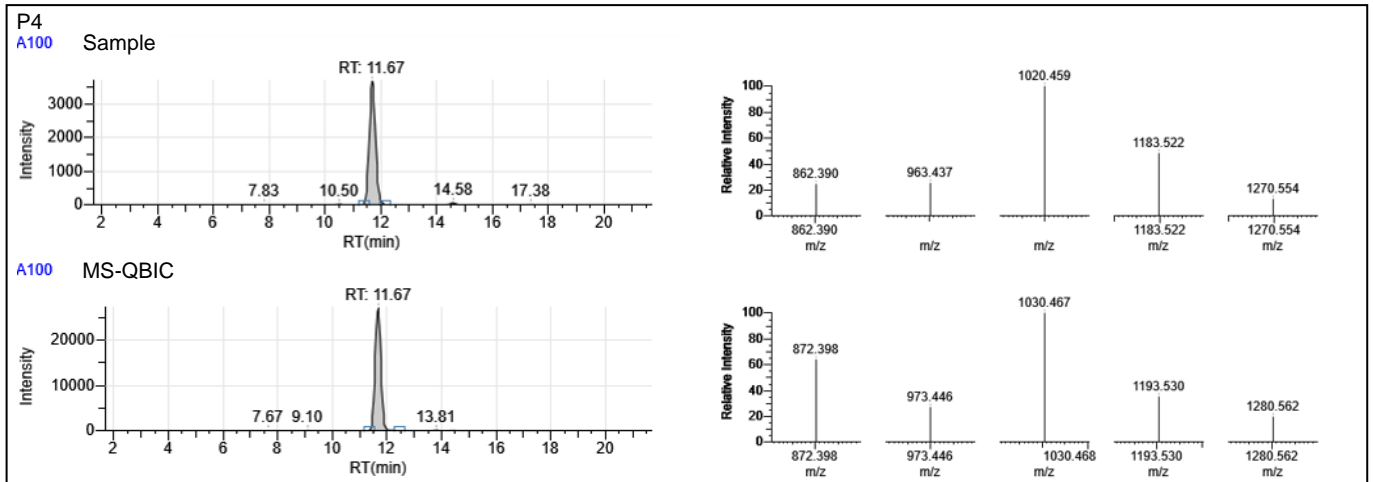

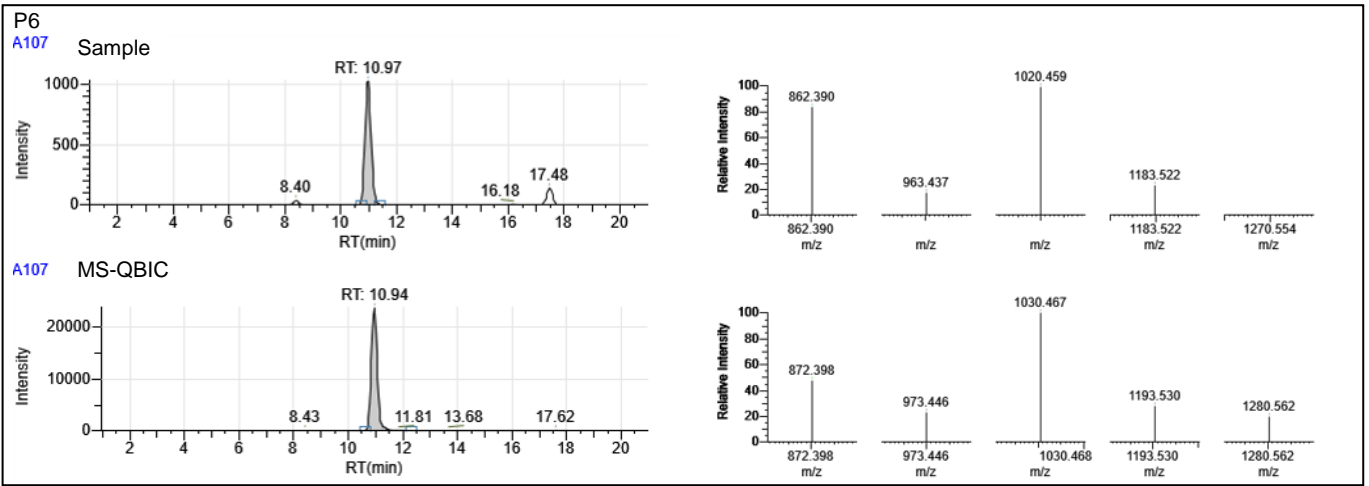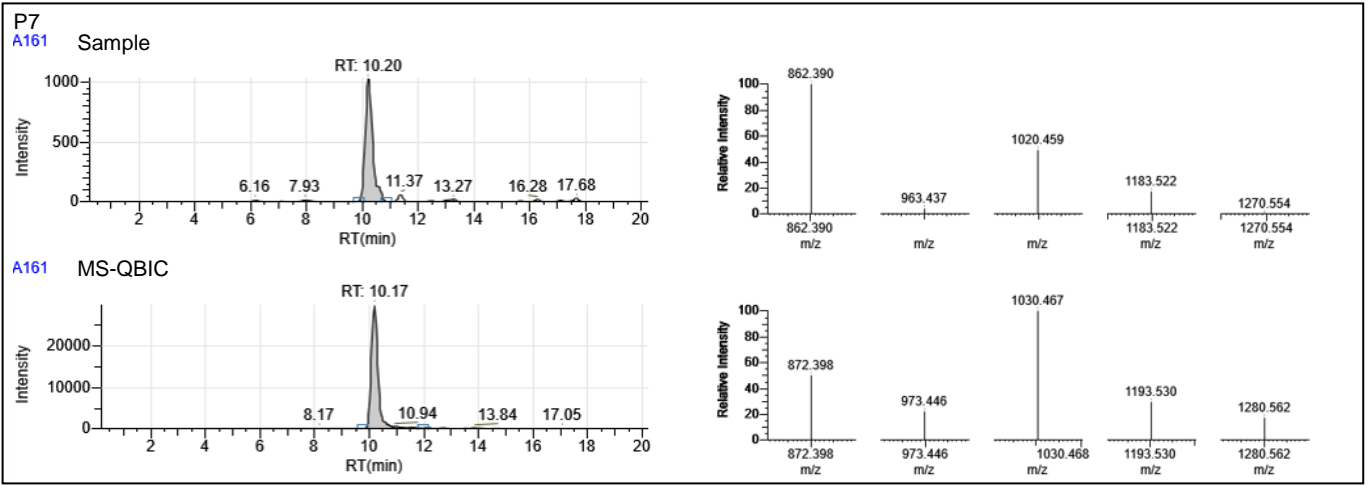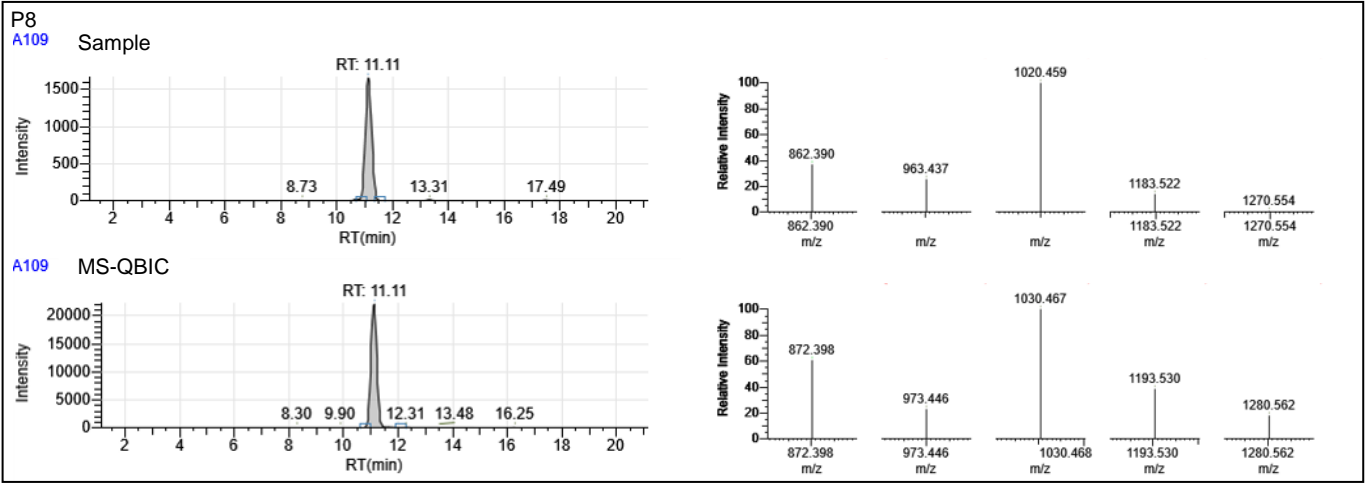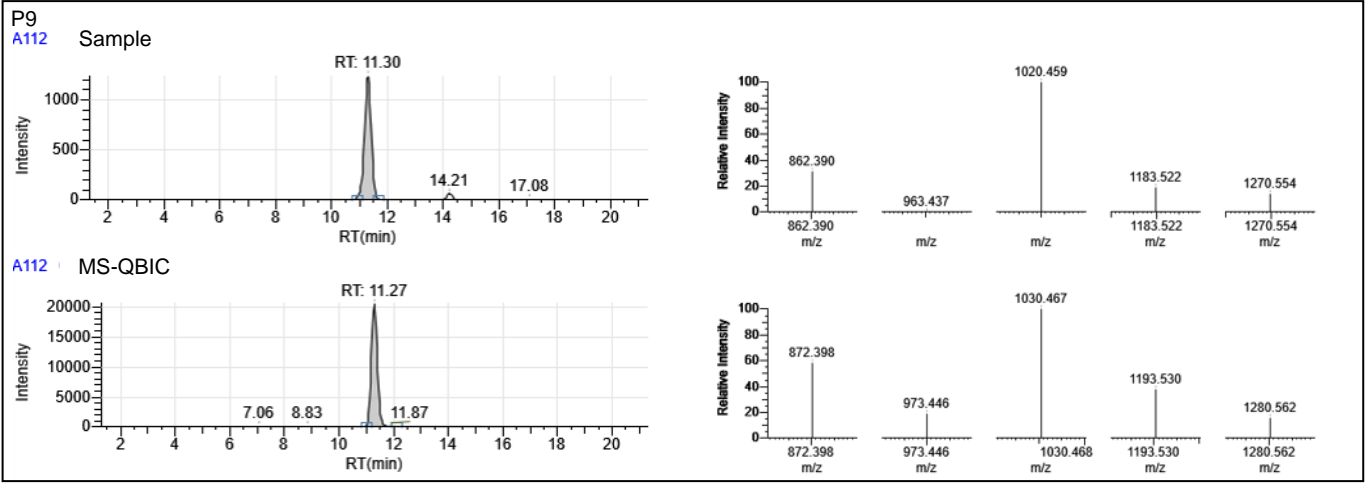

P15  
A169 Sample

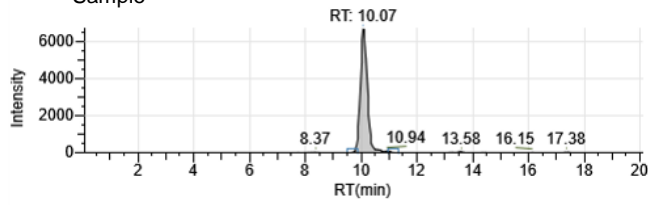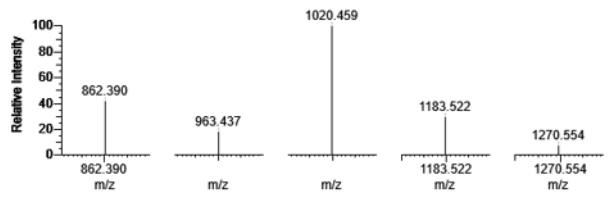

A169 MS-QBIC

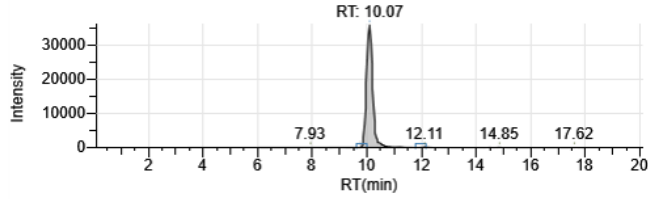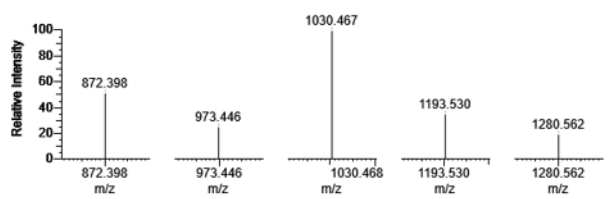

P16  
A174 Sample

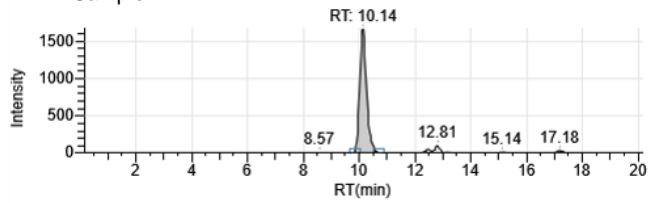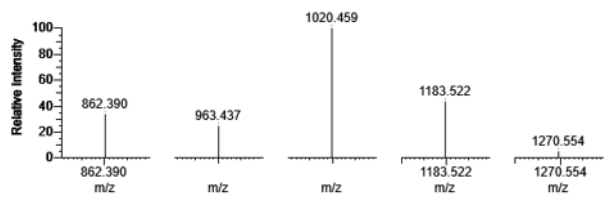

A174 MS-QBIC

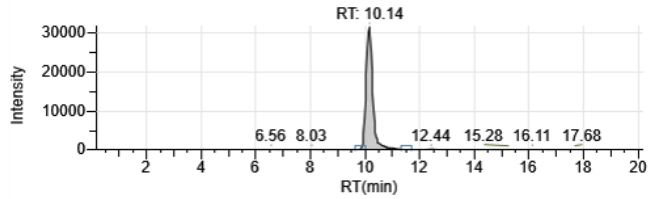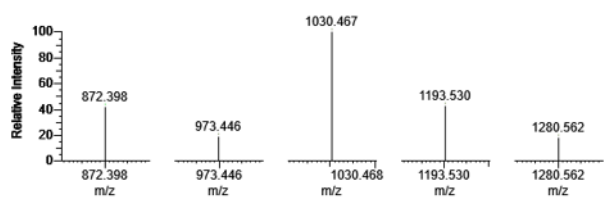

P17  
A132 Sample

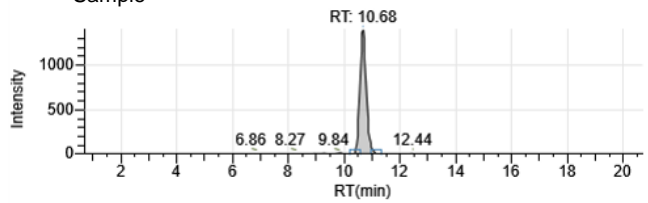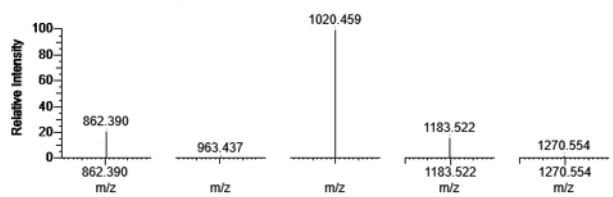

A132 MS-QBIC

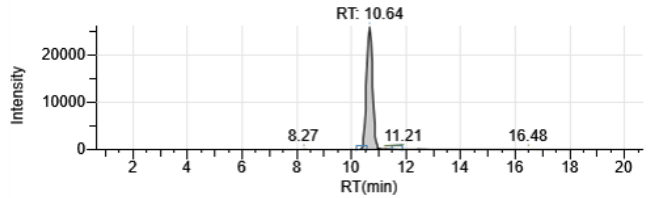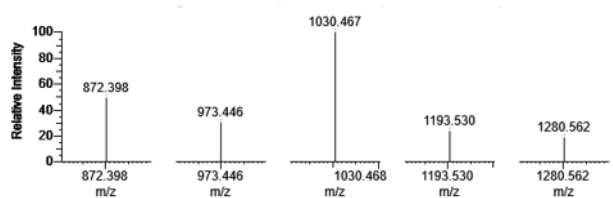

P20  
A145 Sample

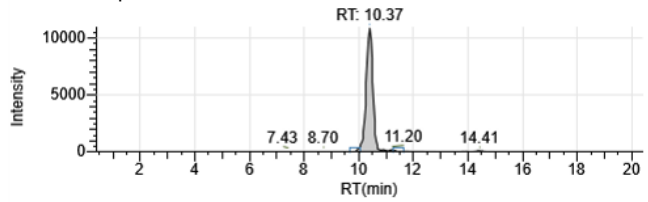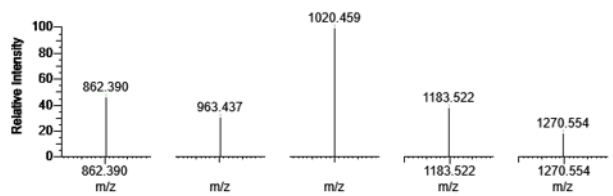

A145 MS-QBIC

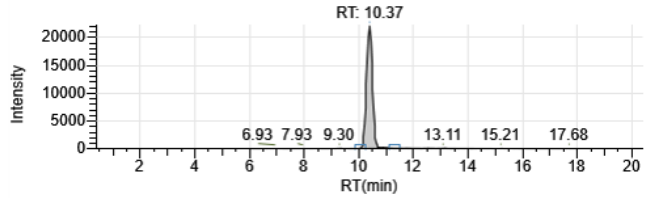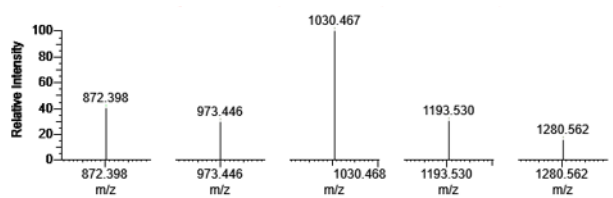

P21  
A149

Sample

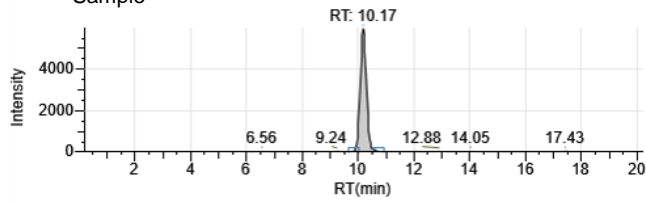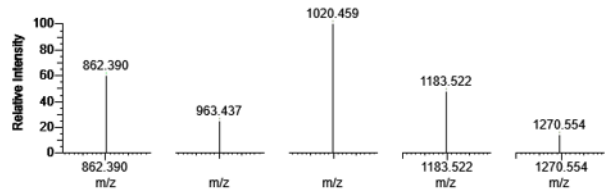

A149 MS-QBIC

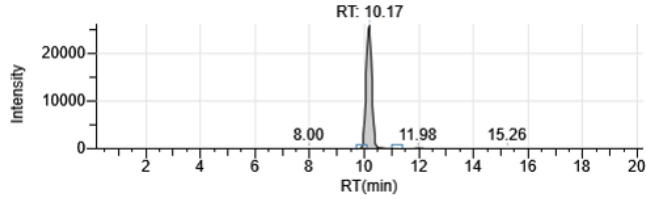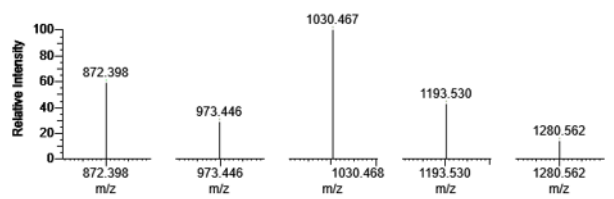

P22  
A125

Sample

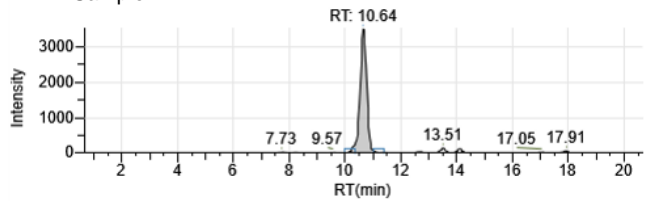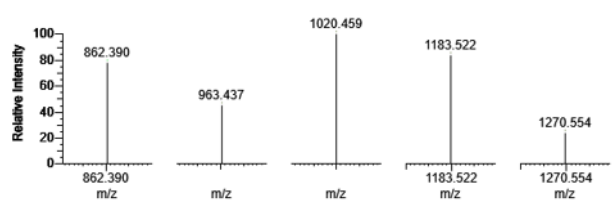

A125 MS-QBIC

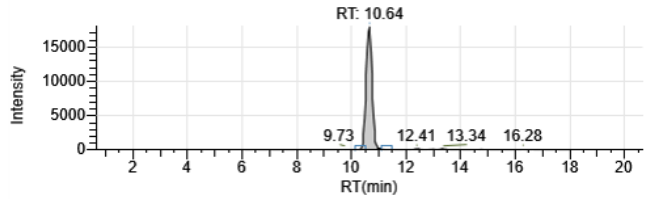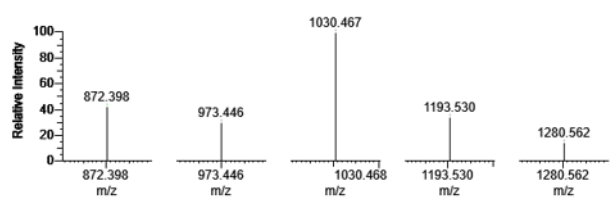

P23  
A166

Sample

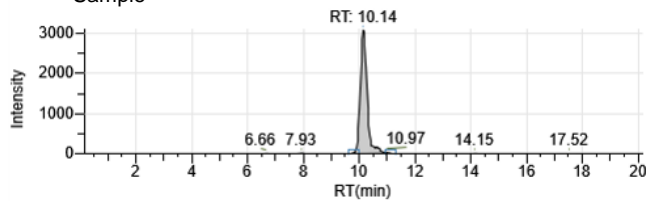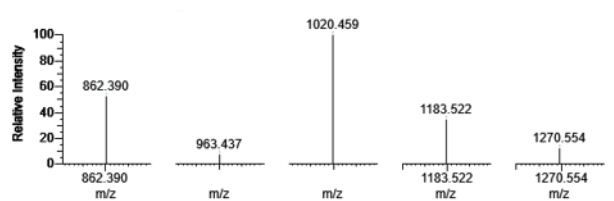

A166 MS-QBIC

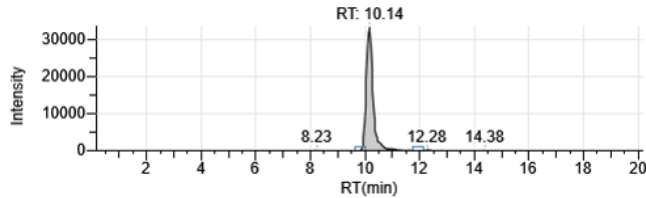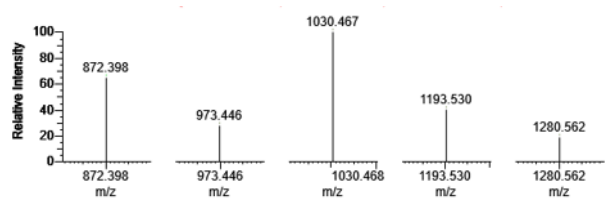

P25  
A158

Sample

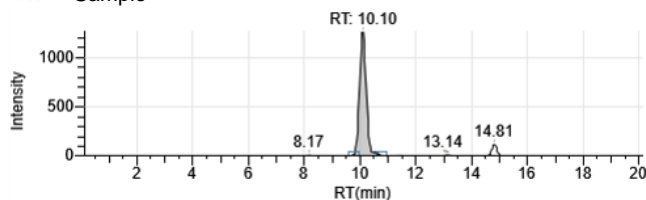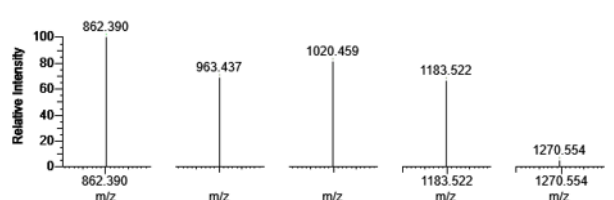

A158 MS-QBIC

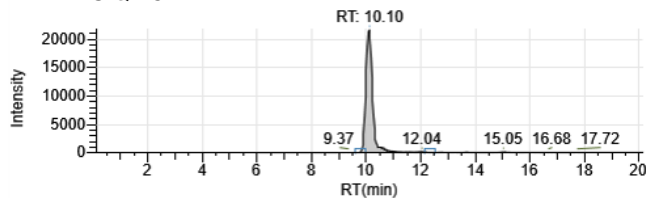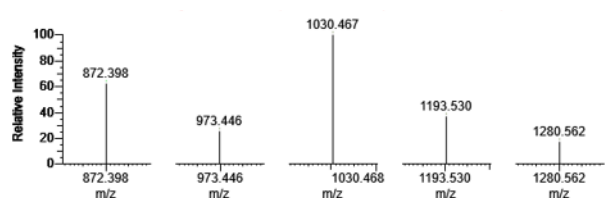



P26  
A128

Sample

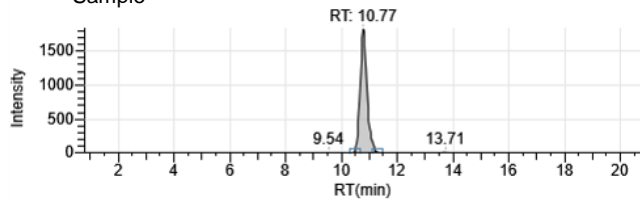

A128 MS-QBIC

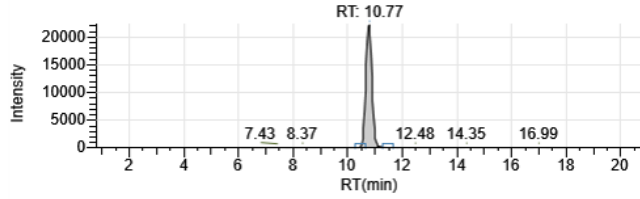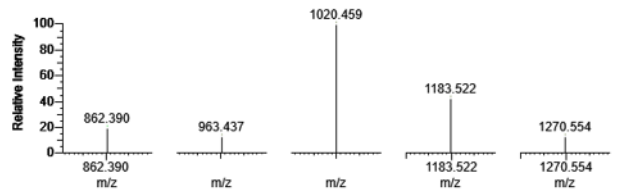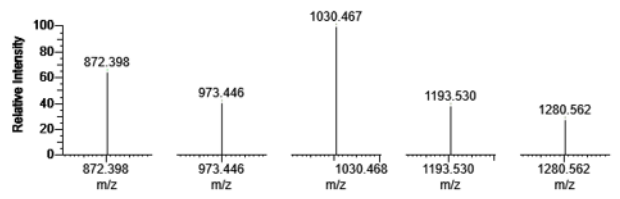

P27

A142

Sample

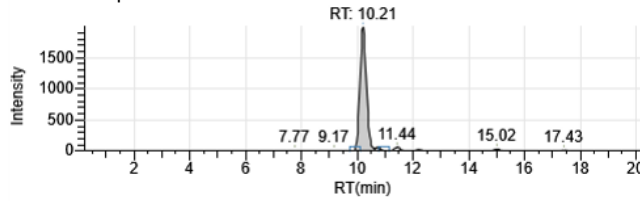

A142 MS-QBIC

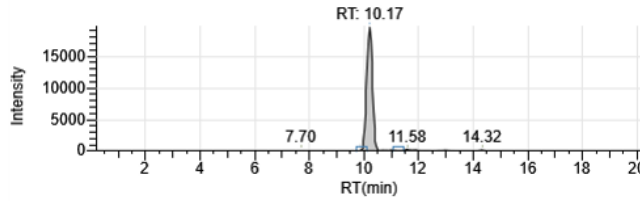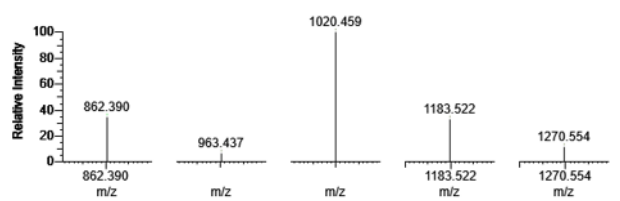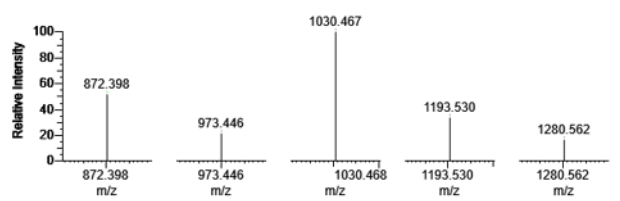

P28

A152

Sample

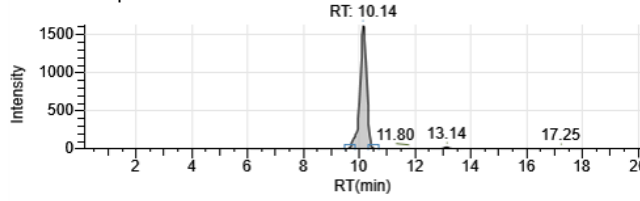

A152 MS-QBIC

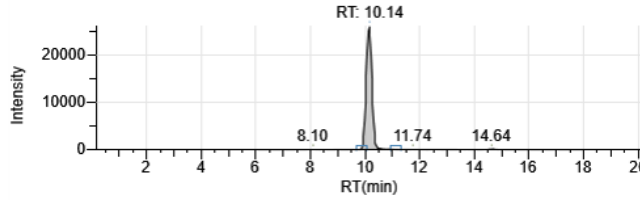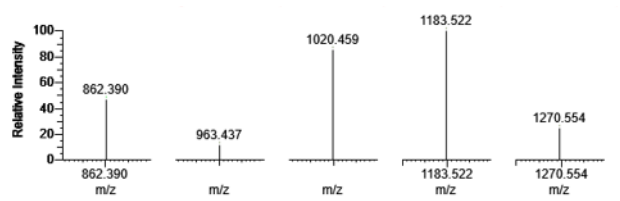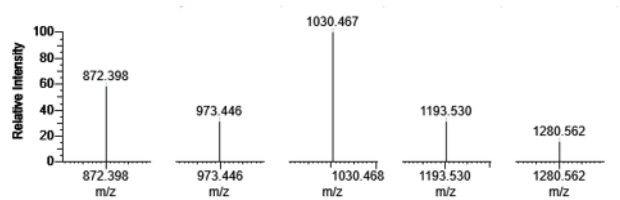

P30

A164

Sample

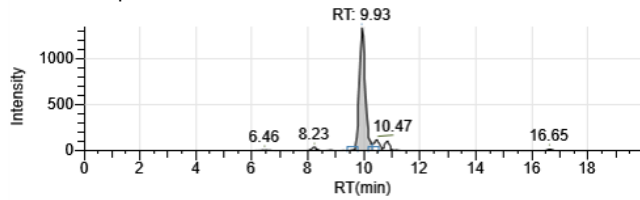

A164 MS-QBIC

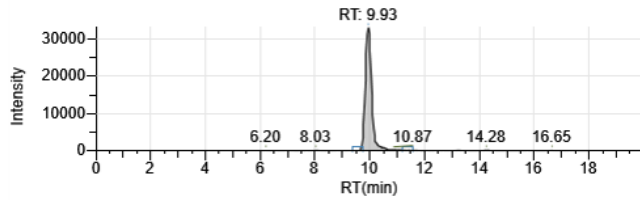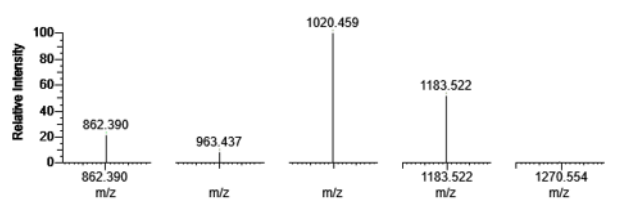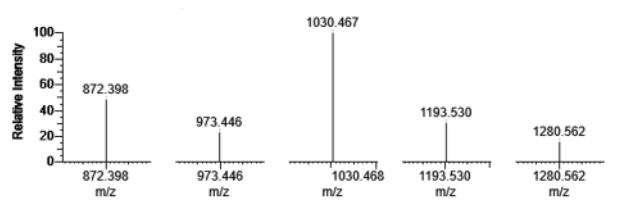

# X Lysozyme (STDYGIFQINSR) Another organ

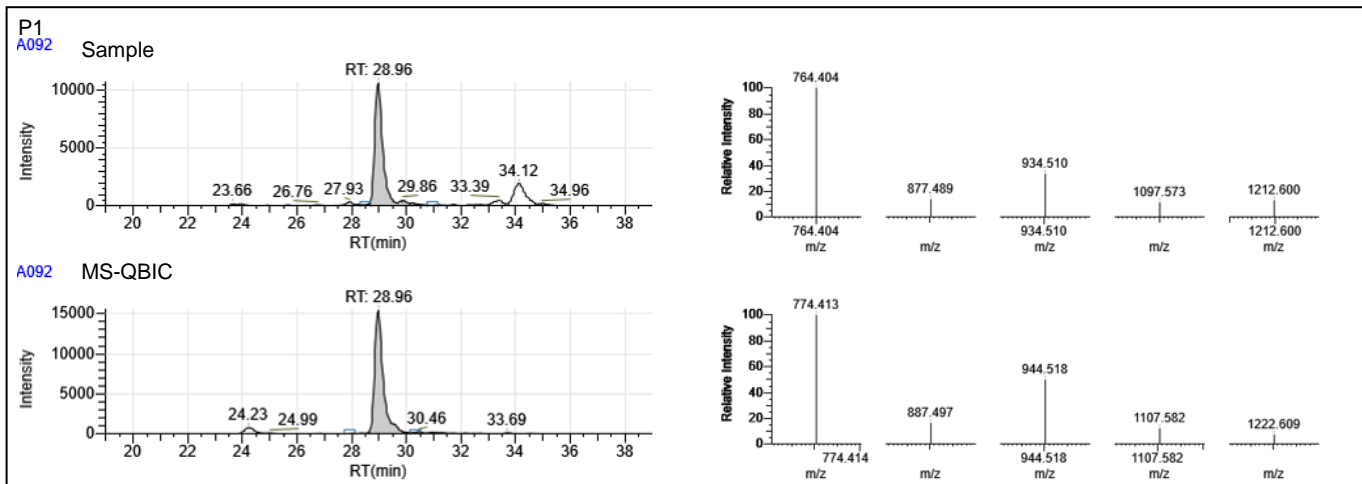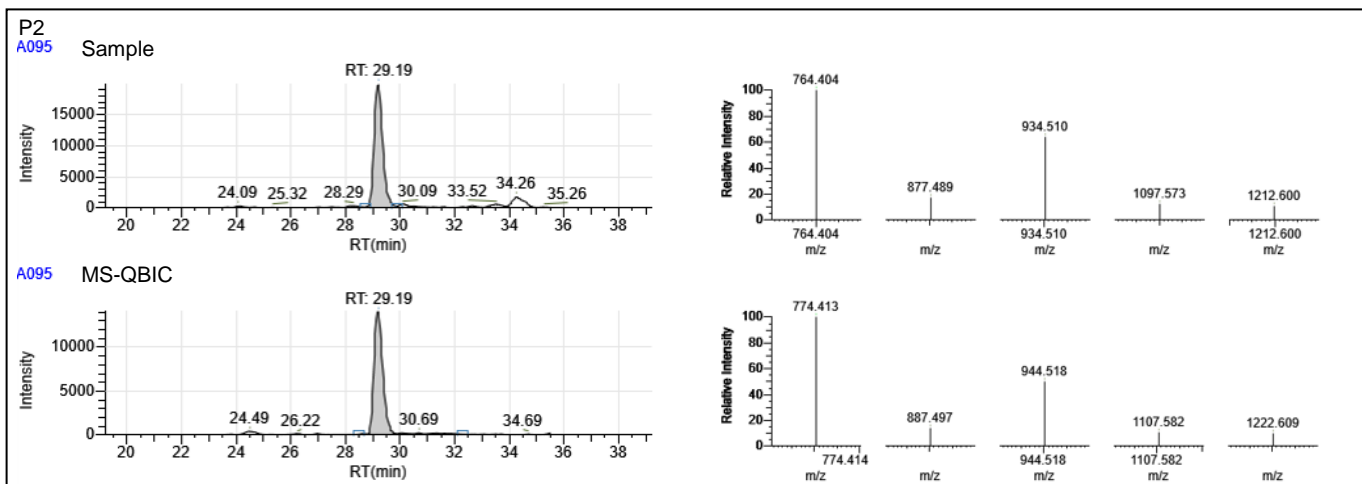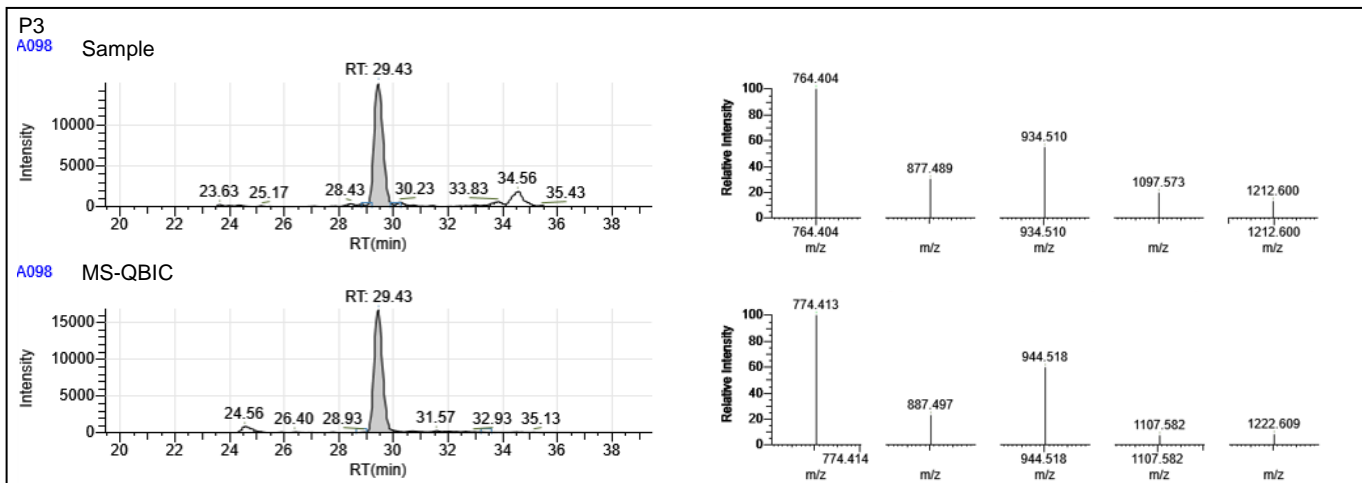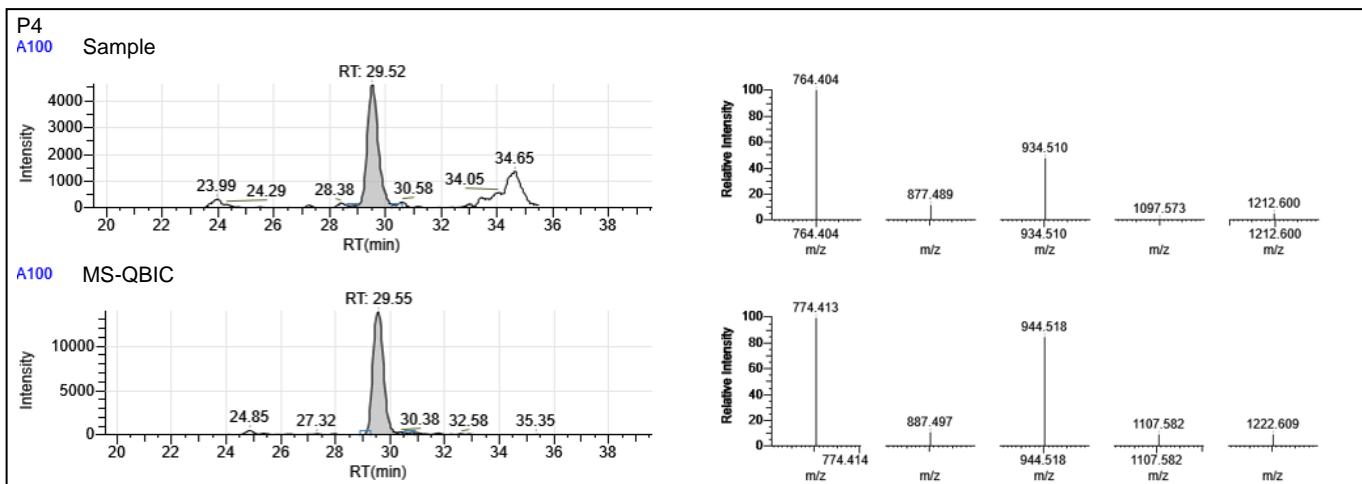

P5  
A103 Sample

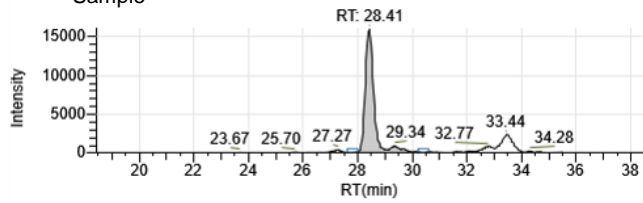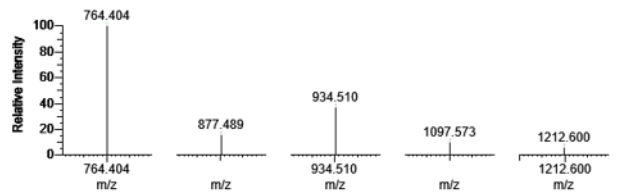

A103 MS-QBIC

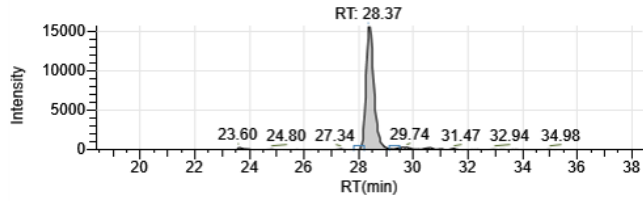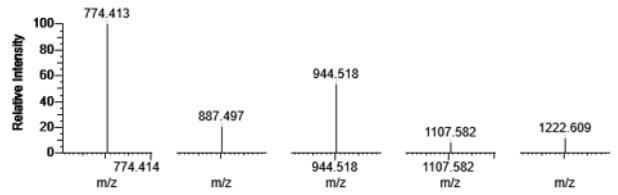

P6  
A107 Sample

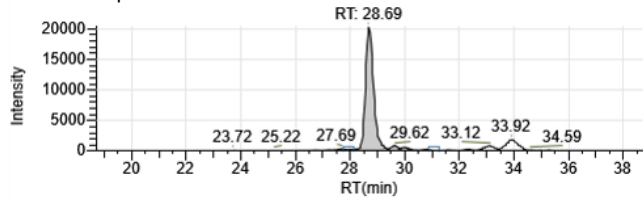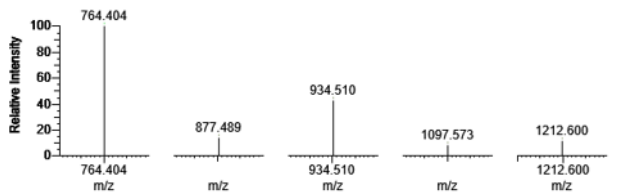

A107 MS-QBIC

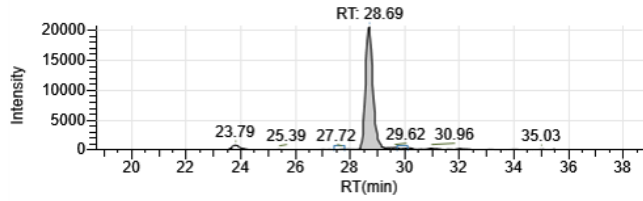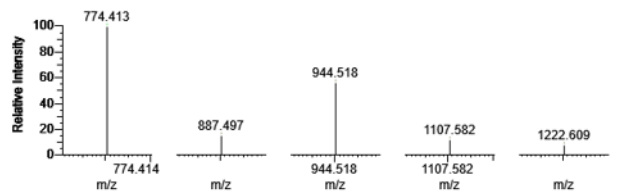

P7  
A161 Sample

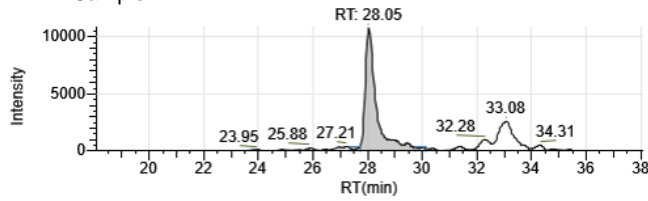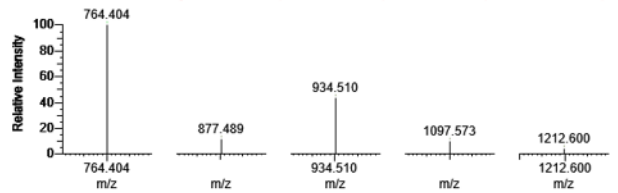

A161 MS-QBIC

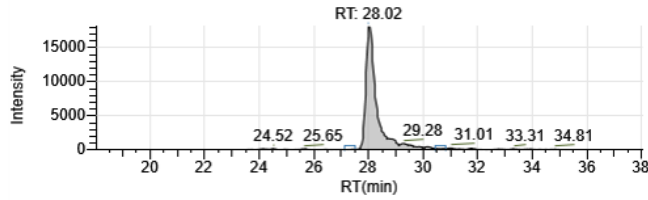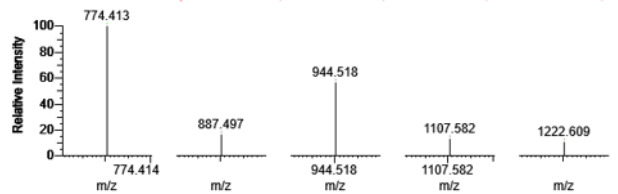

P8  
A110 Sample

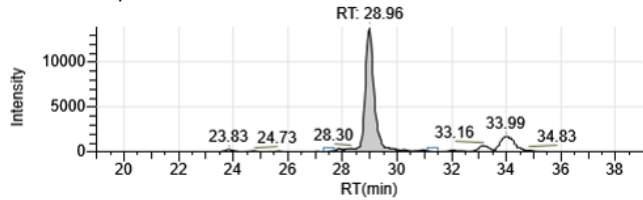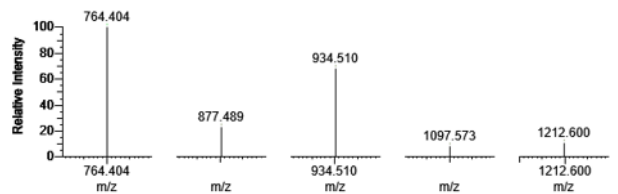

A110 MS-QBIC

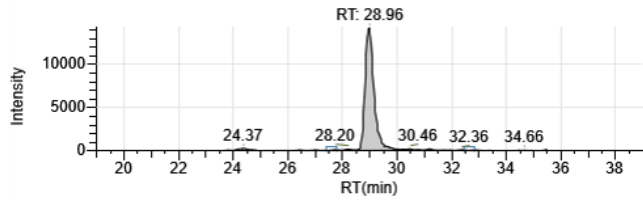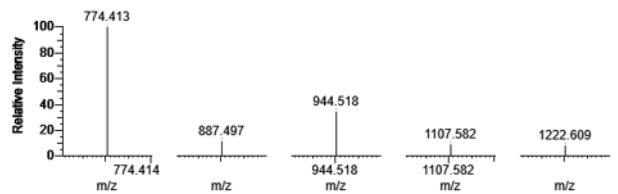

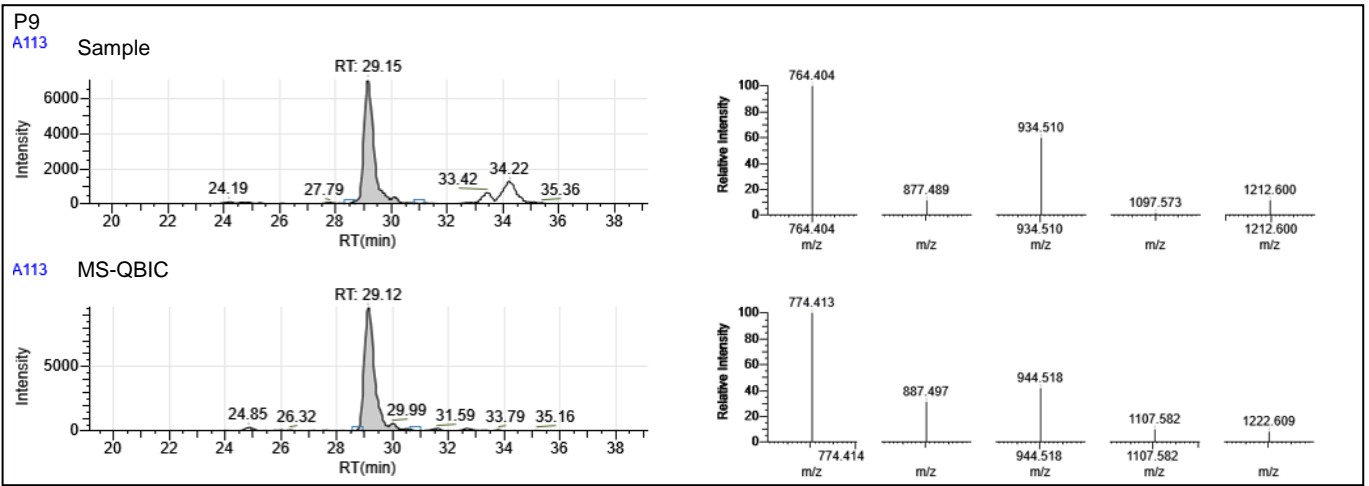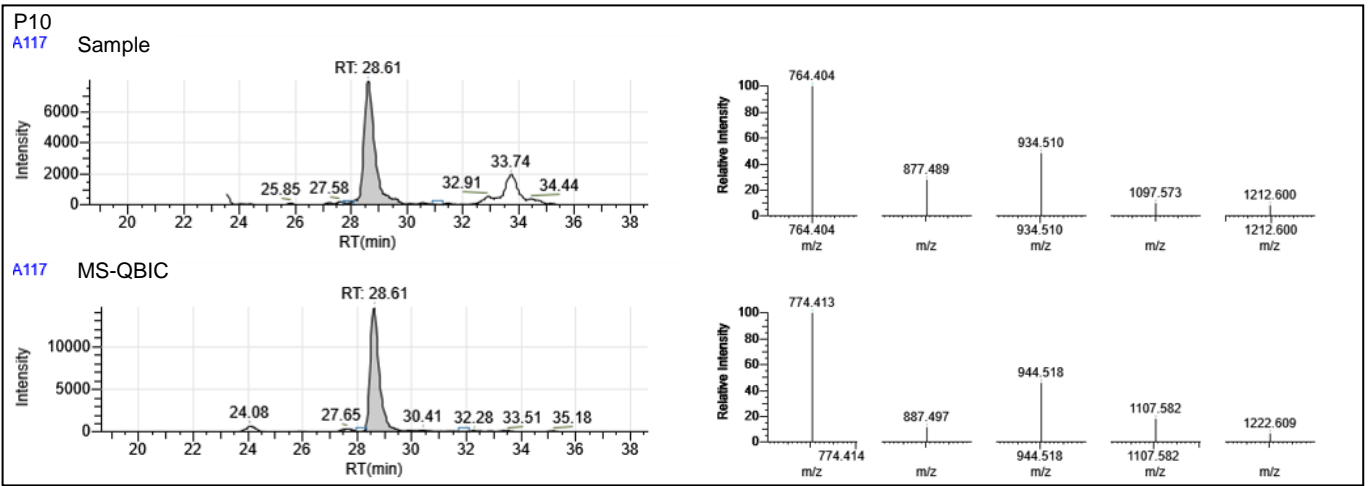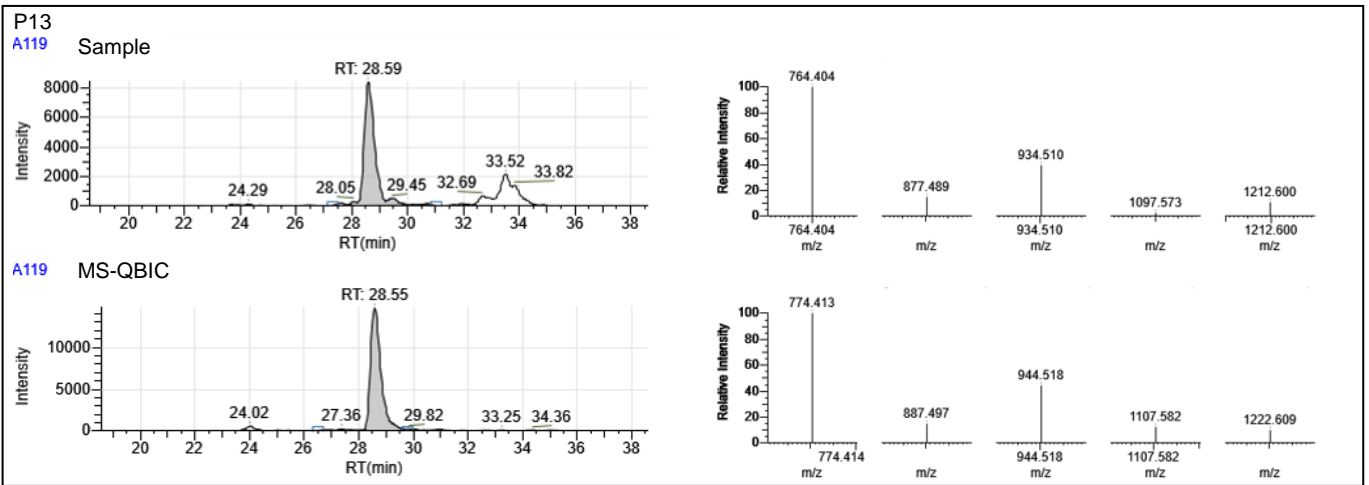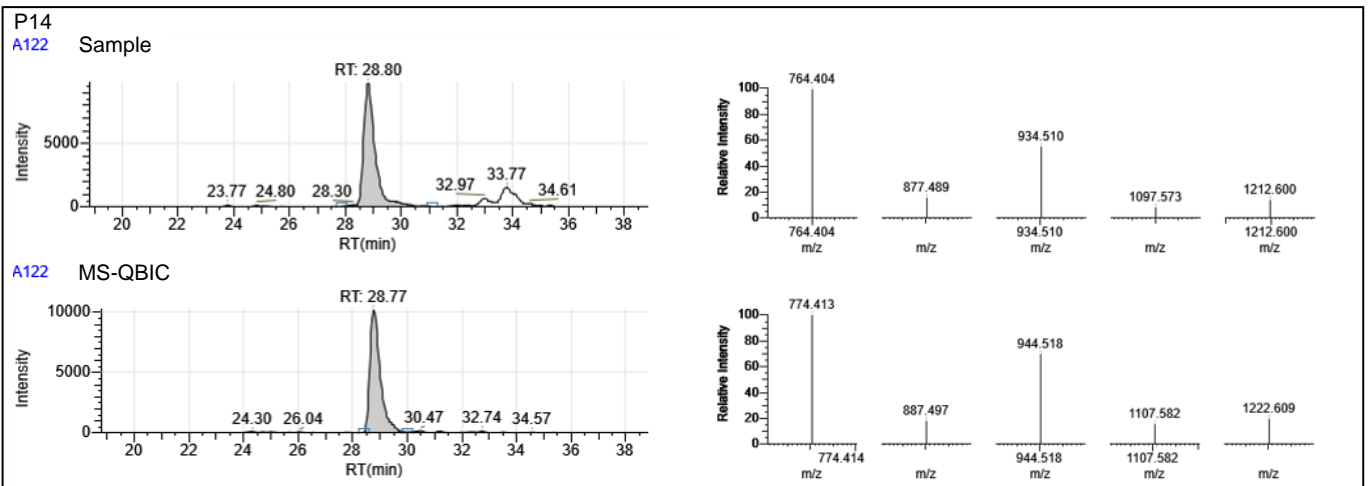

P15  
A169 Sample

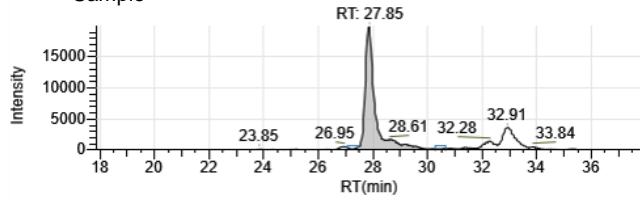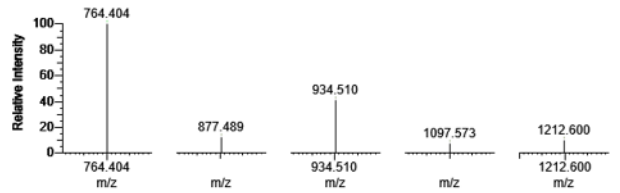

A169 MS-QBIC

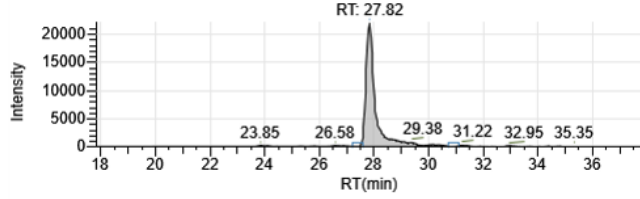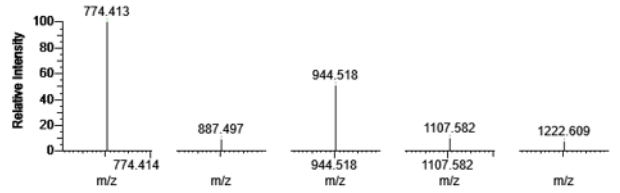

P16  
A174 Sample

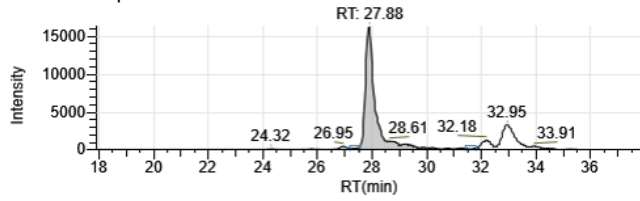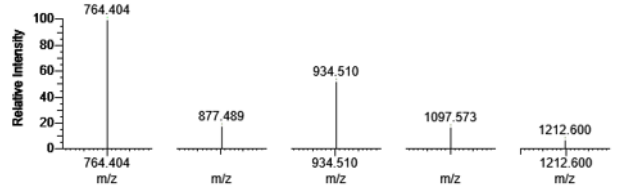

A174 MS-QBIC

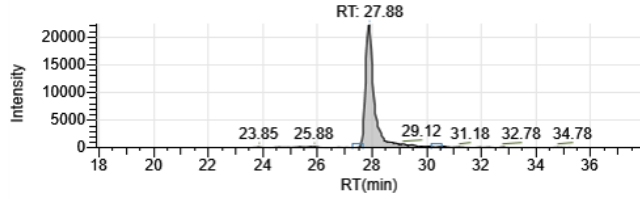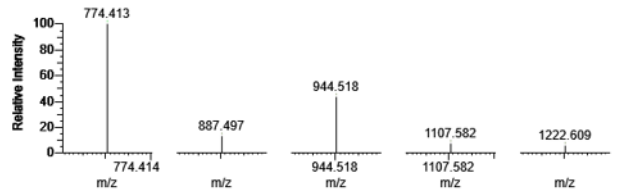

P17  
A132 Sample

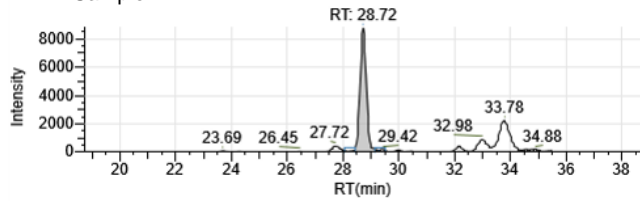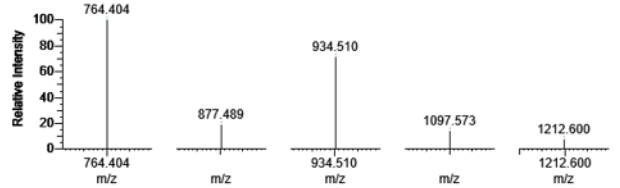

A132 MS-QBIC

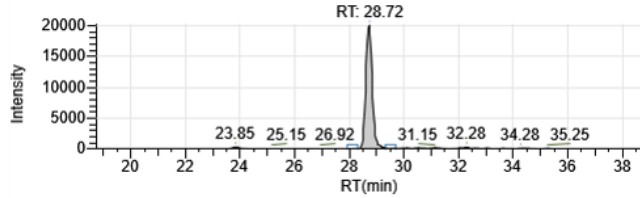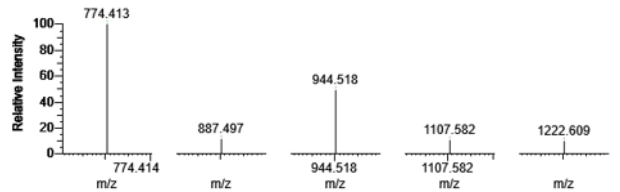

P18  
A134 Sample

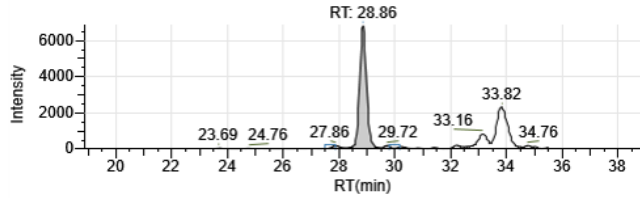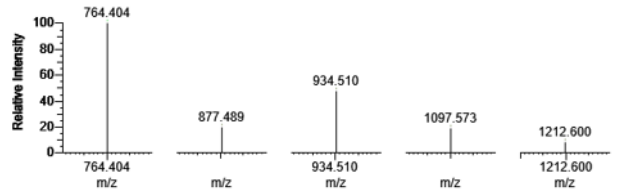

A134 MS-QBIC

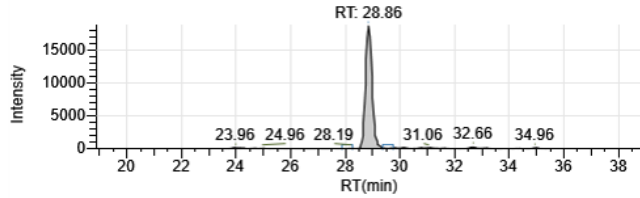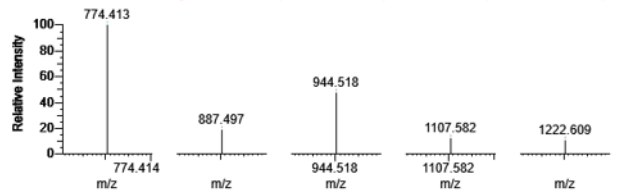

P19  
A138 Sample

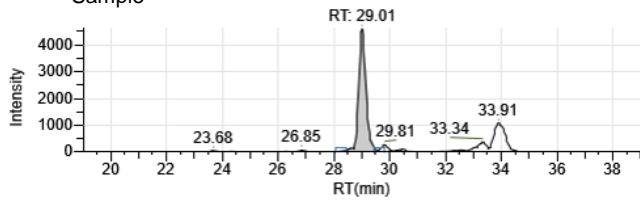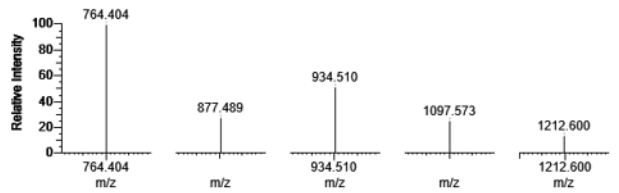

A138 MS-QBIC

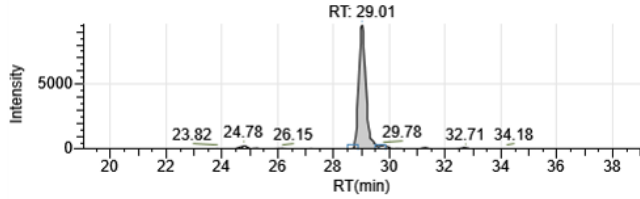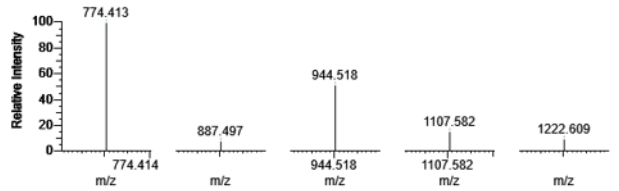

P20  
A146 Sample

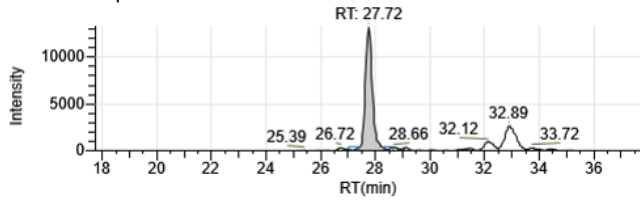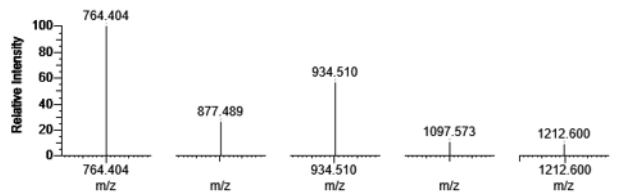

A146 MS-QBIC

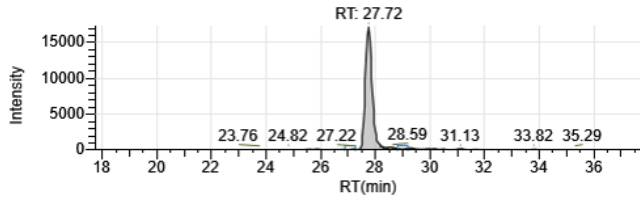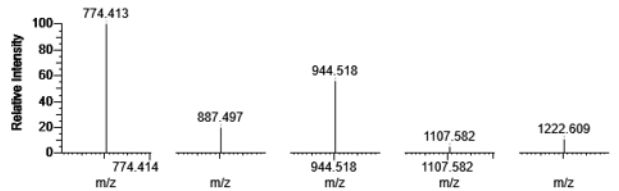

P21  
A148 Sample

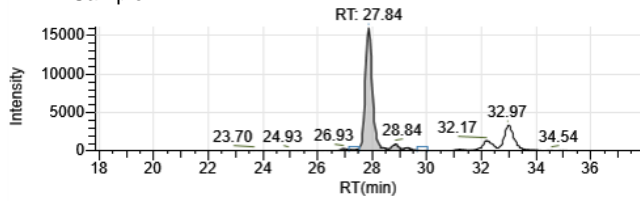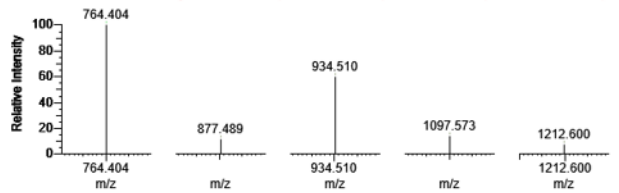

A148 MS-QBIC

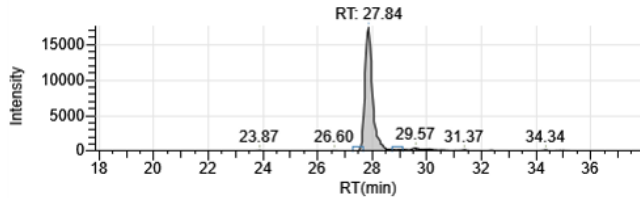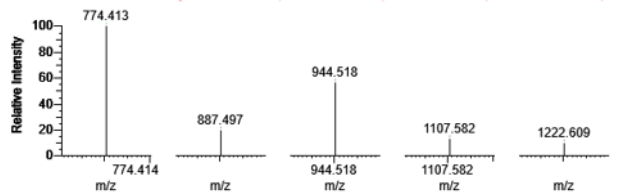

P22  
A125 Sample

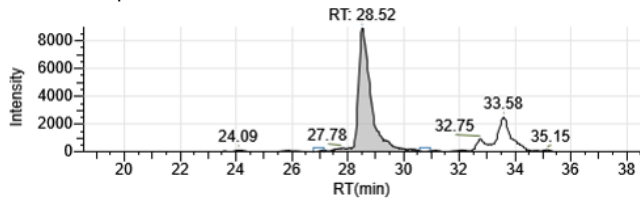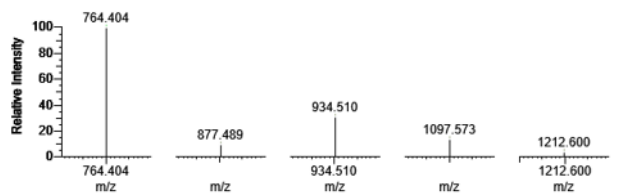

A125 MS-QBIC

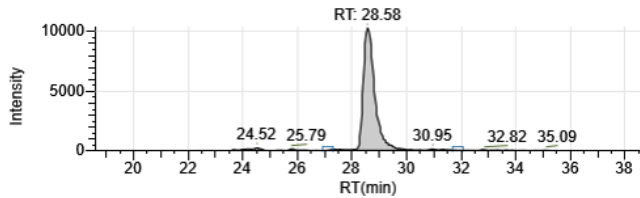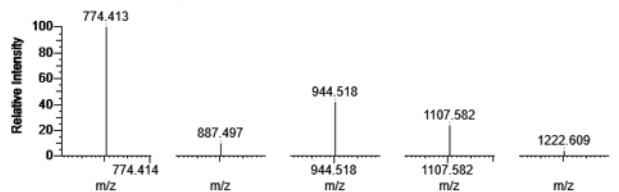

P23  
A167

Sample

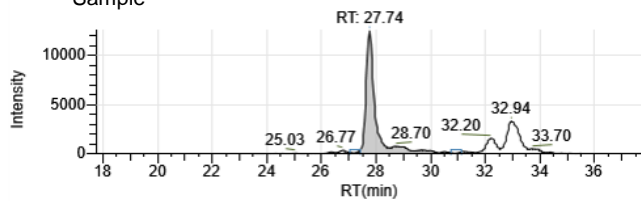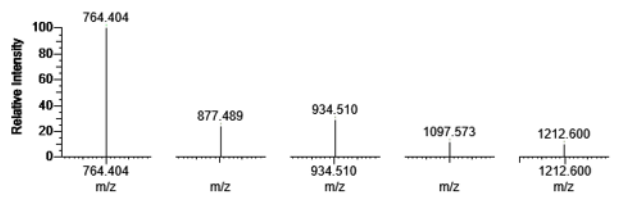

A167 MS-QBIC

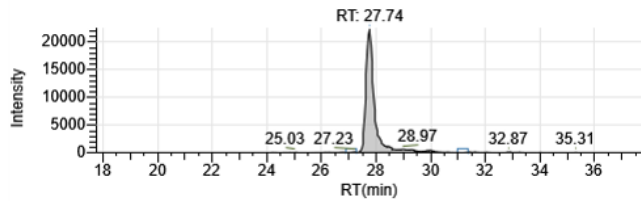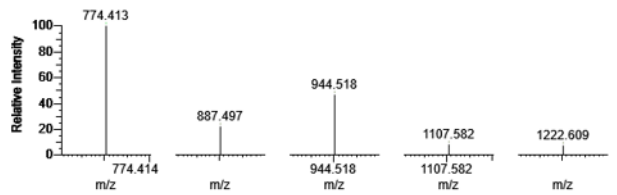

P24  
A154

Sample

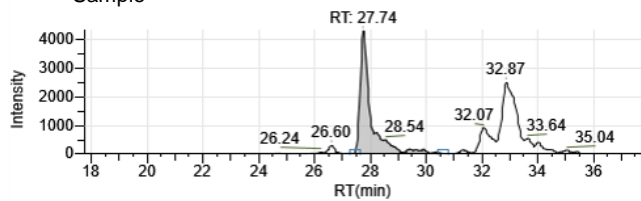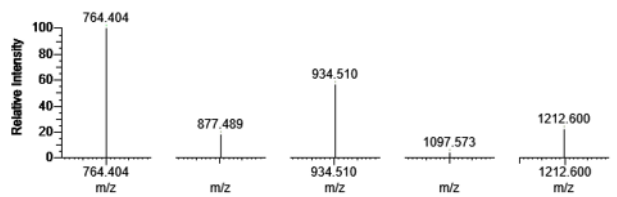

A154 MS-QBIC

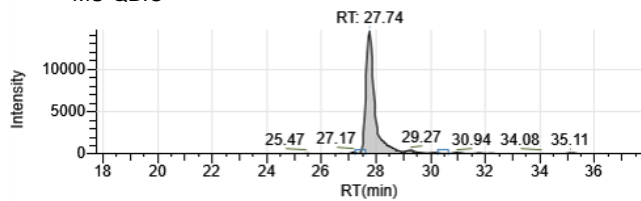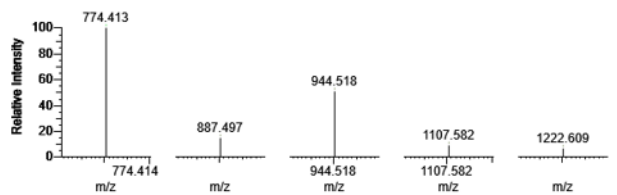

P25  
A158

Sample

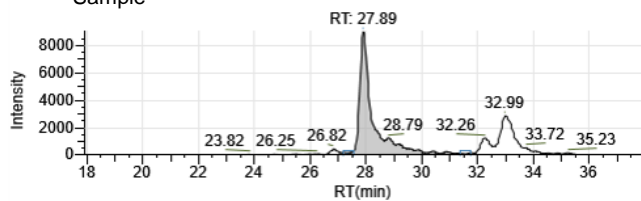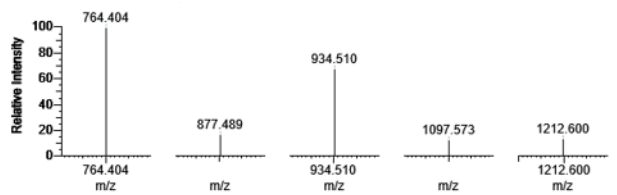

A158 MS-QBIC

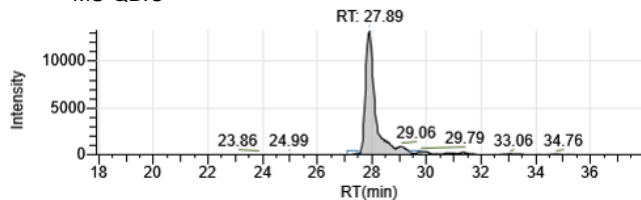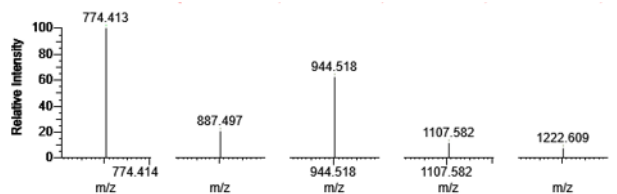

P26  
A128

Sample

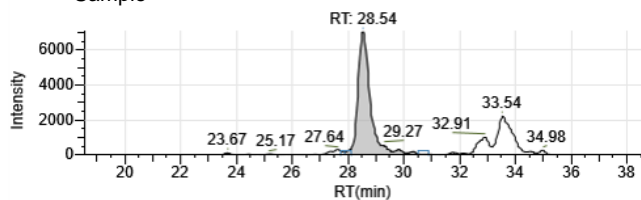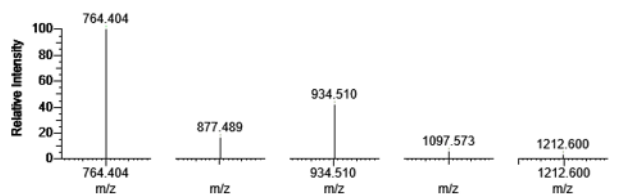

A128 MS-QBIC

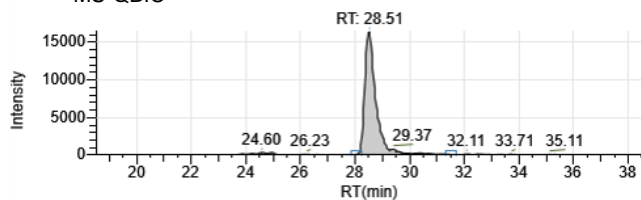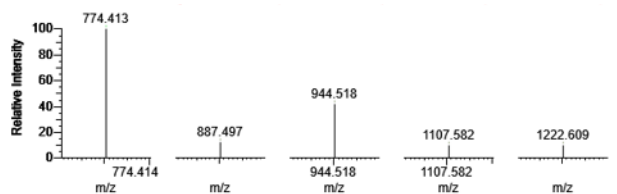



P27  
A143

Sample

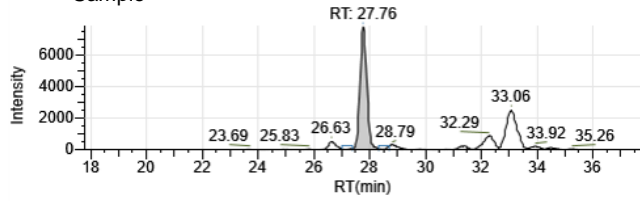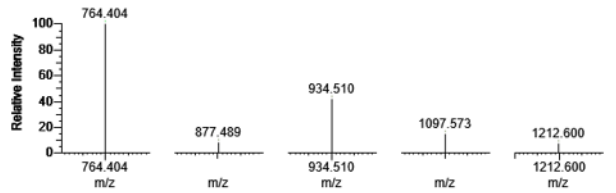

A143 MS-QBIC

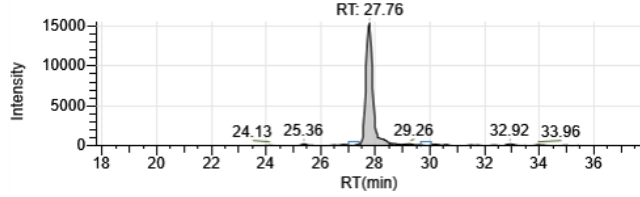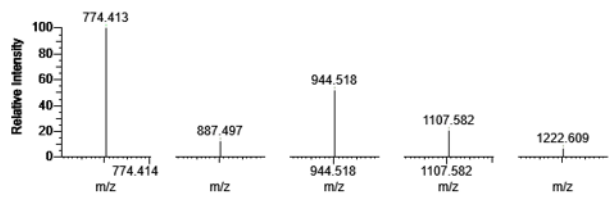

P28  
A151

Sample

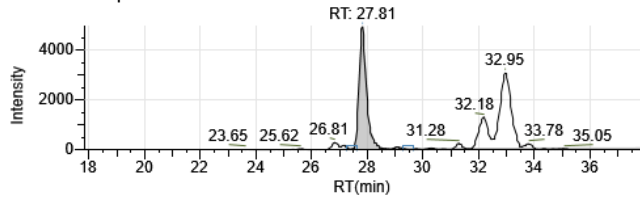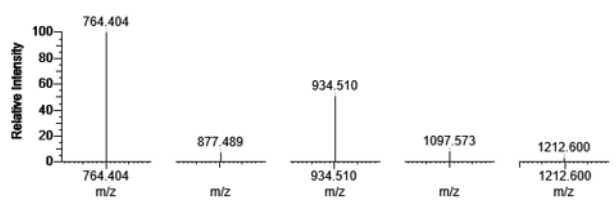

A151 MS-QBIC

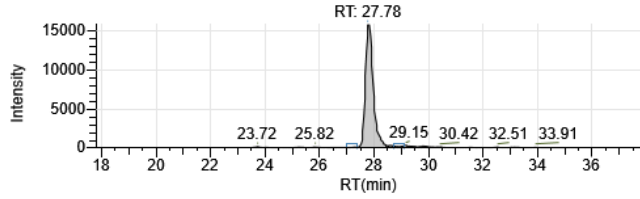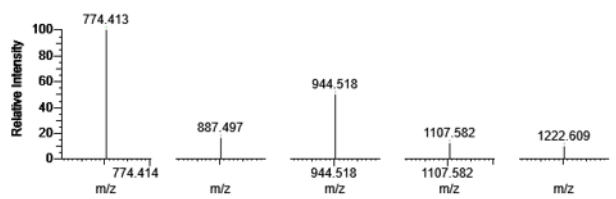

P29  
A139

Sample

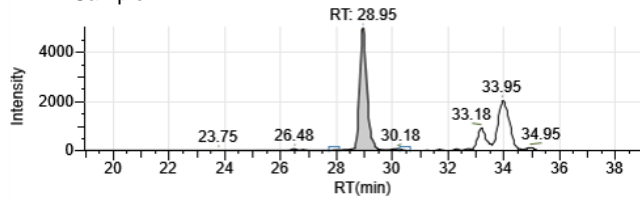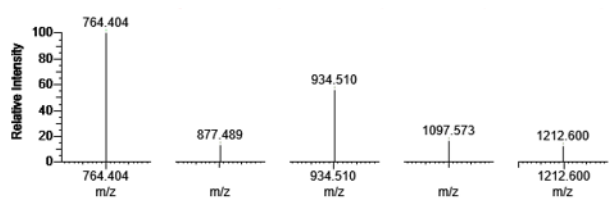

A139 MS-QBIC

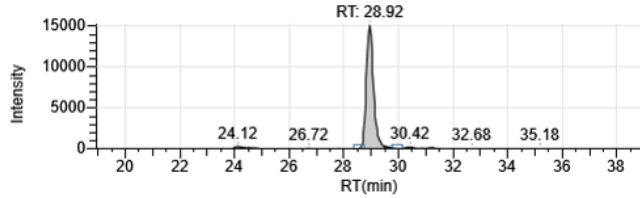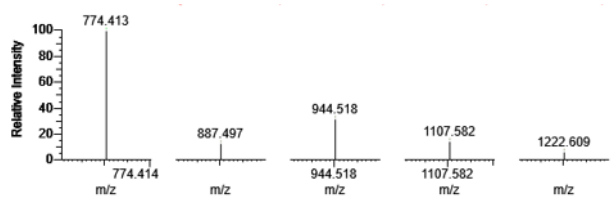

P30  
A164

Sample

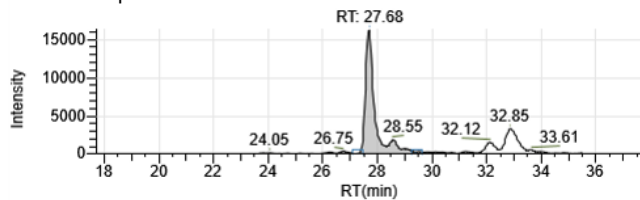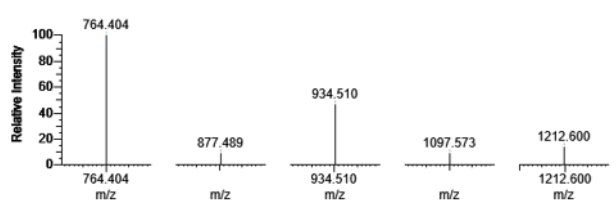

A164 MS-QBIC

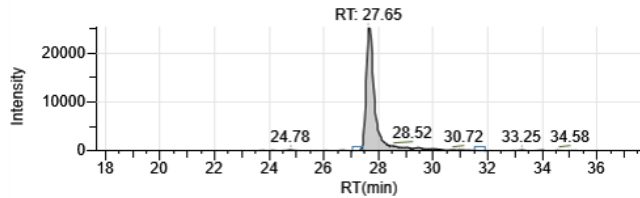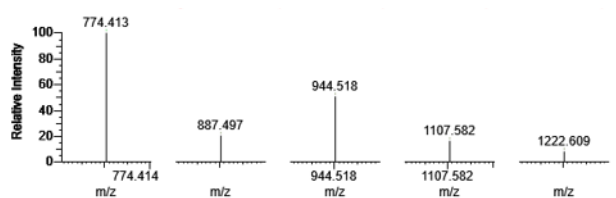

Supplement: pone.0235143.s003.pdf [file pone.0235143.s003.pdf]
