# Supplementary material for: Mass spectrometry-based absolute quantification of amyloid proteins in pathology tissue specimens: Merits and limitations
Source: PubMed Central journal article supplement (PMC7329117; doi:10.1371/journal.pone.0235143), 2020-07-01
Supplement: pone.0235143.s004.pdf [file pone.0235143.s004.pdf]

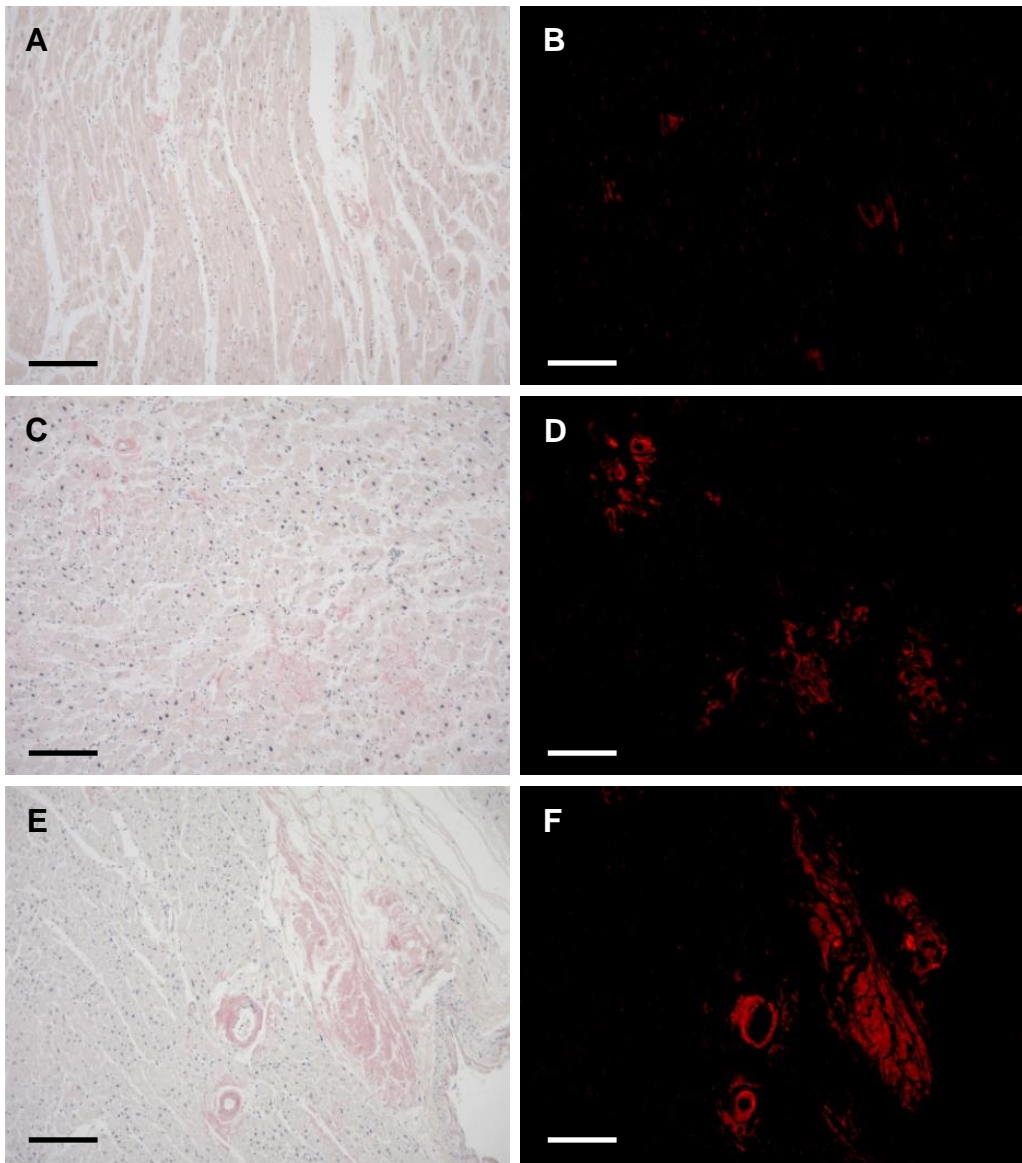

**S1 Fig. Amyloid deposition by Congo red staining.**

The amount of Congo red-positive deposition was scored in five grades 1 - 5, from minimal to severe (A, C, E). The staining was well visualized under the FITC filter of a BZ-X710 all-in-one fluorescent microscope (B, D, F). Grade 2 (A and B), Grade 3 (C and D), and Grade 5 (E and F). Scale bars, 200 $\mu$ m
