# Supplementary material for: Mass spectrometry-based absolute quantification of amyloid proteins in pathology tissue specimens: Merits and limitations
Source: PubMed Central journal article supplement (PMC7329117; doi:10.1371/journal.pone.0235143), 2020-07-01
Supplement: pone.0235143.s005.pdf [file pone.0235143.s005.pdf]

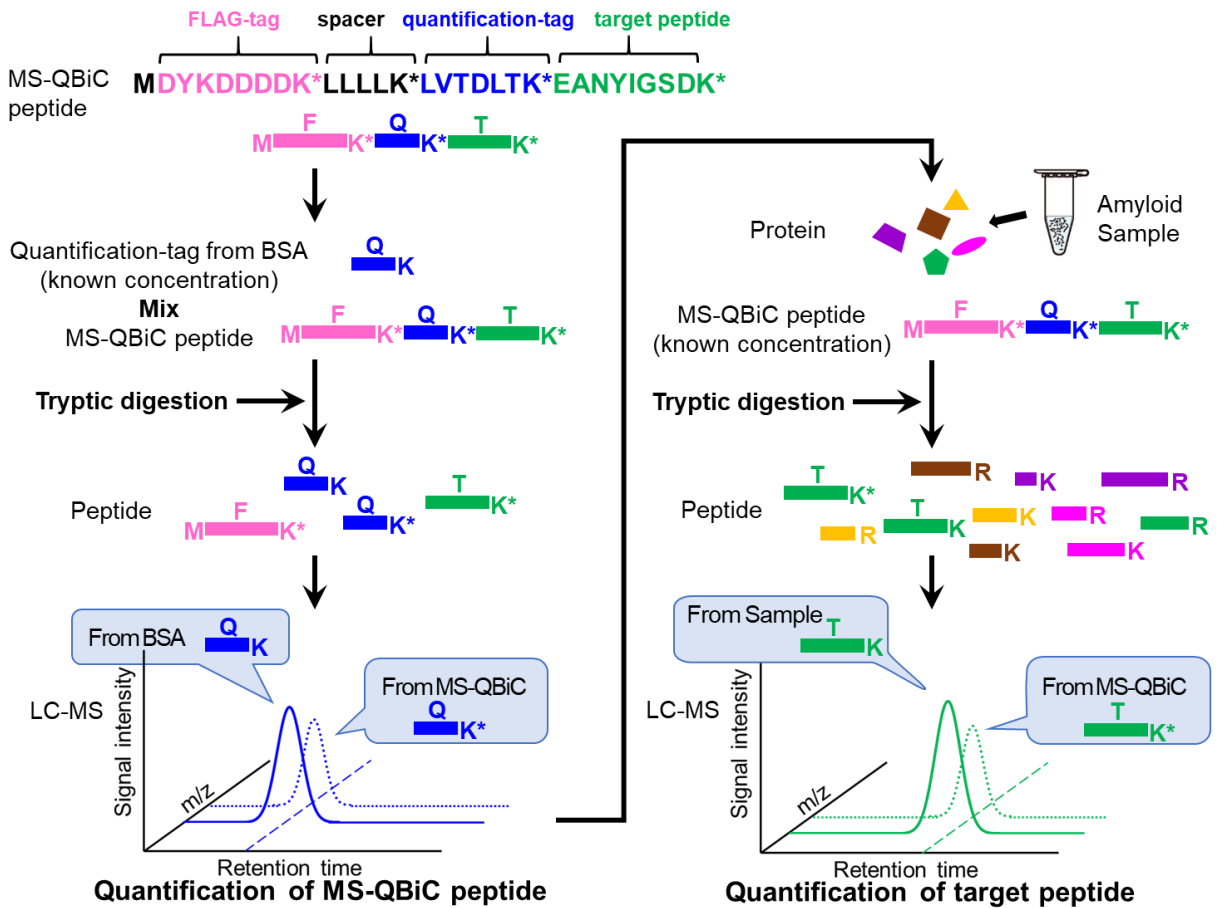

**S2 Fig. Workflow of quantification of amyloid proteins by mass spectrometry-based quantification by isotope-labeled cell-free products (MS-QBiC).**

The workflow has two parts: the synthesis and quantification of the MS-QBiC peptides (left side) and the quantification of target peptides using the MS-QBiC peptide as reference (right side).
