# Supplementary material for: Mass spectrometry-based absolute quantification of amyloid proteins in pathology tissue specimens: Merits and limitations
Source: PubMed Central journal article supplement (PMC7329117; doi:10.1371/journal.pone.0235143), 2020-07-01
Supplement: pone.0235143.s006.pdf [file pone.0235143.s006.pdf]

A

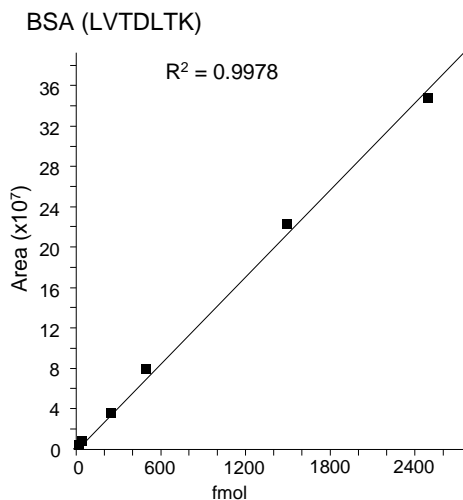

B

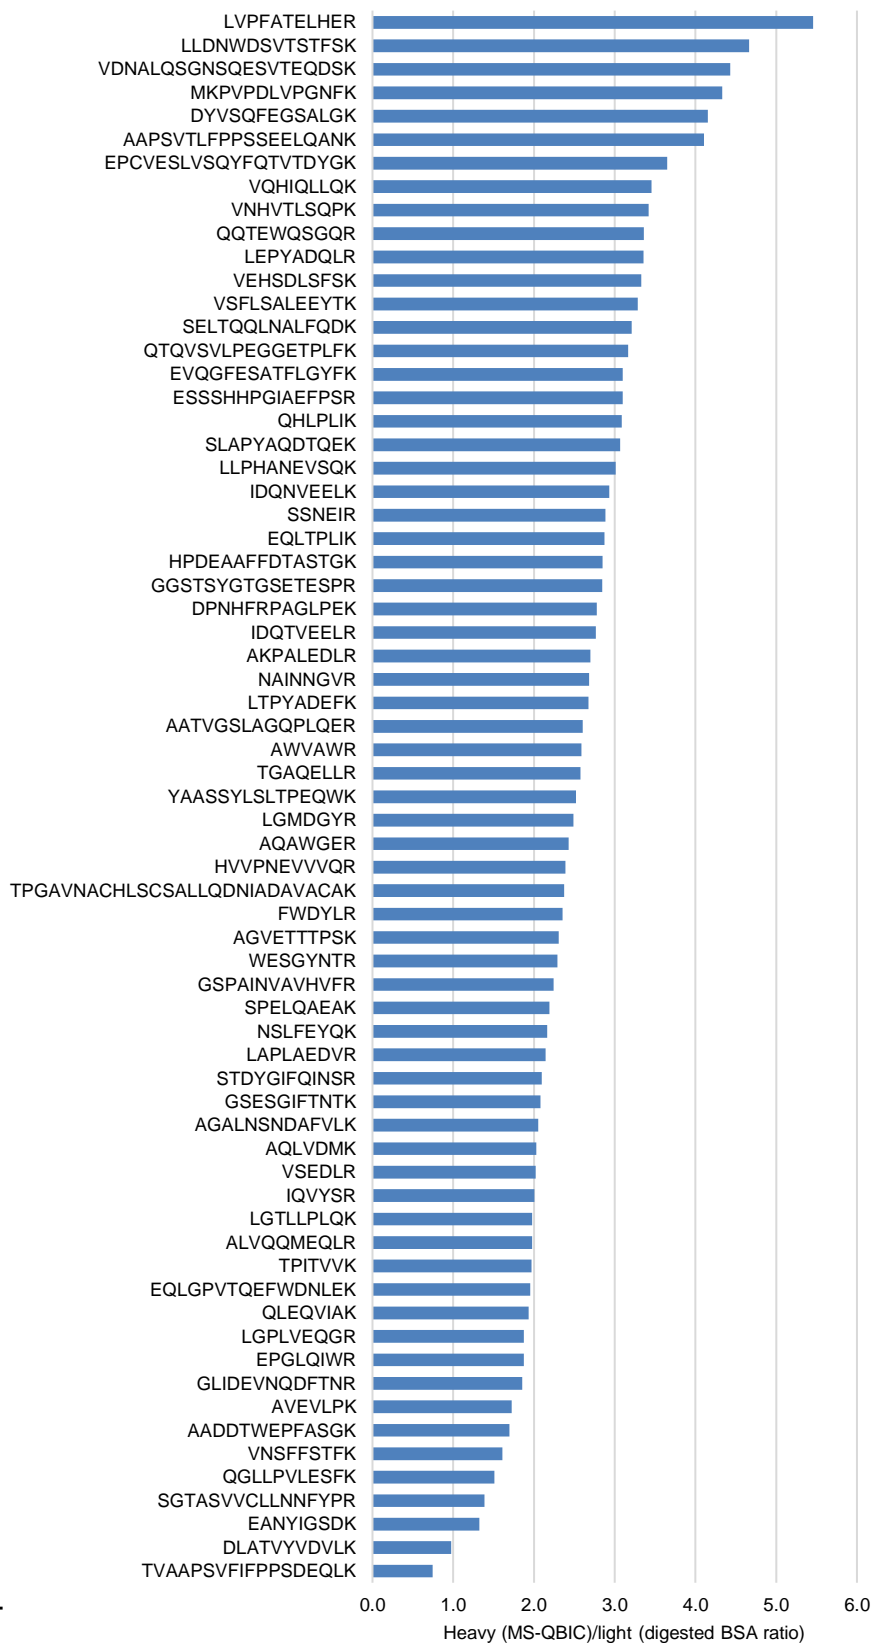

**S3 Fig. Supporting information for the estimation of the concentration of MS-QBIC peptides**

A) Signal linearity of the quantification tag measured by mass spectrometry.

B) Heavy to light ratios of quantification tag signals used to estimate the concentration of MS-QBIC peptides.
